# Supplementary material for: Polycomb misregulation in enterocytes drives tissue decline in the aging Drosophila intestine
Source: Genome Res. 2026 Jan;36(1):102–14. doi: 10.1101/gr.281058.125 (PMC12758387; doi:10.1101/gr.281058.125)
Supplement: Supplement 2 [file Supplemental_Tables.xlsx]

## Sheet: Read_me
Table S1: Alignment statistics for sequencing data used in this paper
Table S2: List of peaks called by SEACR on aggregate H3K27me3 sciCUT&Tag data
Columns in this table:
1. Chromosome
2. Start position
3. End position
Table S3: List of fragment numbers per cell for H3K27me3 sciCUT&Tag
Cutoff to retain cells with at least 100 fragments per cell
Columns in this table:
1. Cell-specific barcodes
2. Total number of fragments for each cell
3. Age of the cell
Table S4: List of fraction of reads in peaks (FRiPs) per cell for H3K27me3 sciCUT&Tag
Cutoff to retain cells with a FRiP score of 0.7 or greater
Columns in this table:
1. Cell-specific barcodes
2. Number of fragments that fall within peaks for each cell
3. Total number of fragments for each cell
4. Fraction of reads in peaks (FRiP) for one cell
5. Age of the cell
Table S5: List of ratio of reads that fall within blacklisted regions per cell for H3K27me3 sciCUT&Tag
Cutoff to retain cells with a blacklist ration less than 0.2
Columns in this table:
1. Cell-specific barcodes
2. Number of fragments that fall within blacklisted regions for each cell
3. Total number of fragments for each cell
4. Fraction of reads in blacklisted regions for one cell
5. Age of the cell
Table S6: List of number of cells by cell type for each age and median fragments per cell
Table S7: List of genes that fall within H3K27me3 sciCUT&Tag peaks
Columns in this table:
1. Chromosome
2. Start position
3. End position
4. Strandedness of the gene
5. gene name
Table S8: Gene counts table for genes within peaks for ISC/Ebs
calculated using bedtools intersect -c on fragment file and genes in peaks list and then normalized as counts per million (CPM)
columns in this table:
1. Chromosome
2. Start position
3. End position
4. Strandedness of the gene
5. gene name
6. Counts per million (CPM) for ISC/EBs 1 day old chip1
7. Counts per million (CPM) for ISC/EBs 1 day old chip2
8. Counts per million (CPM) for ISC/EBs 15 days old chip1
9. Counts per million (CPM) for ISC/EBs 15 days old chip2
10. Counts per million (CPM) for ISC/EBs 40 days old chip2
11. Counts per million (CPM) for ISC/EBs 40 days old chip2
Table S9: Gene count table for genes within peaks for enteroendocrine cells
calculated using bedtools intersect -c on fragment file and genes in peaks list and then normalized as counts per million (CPM)
columns in this table:
1. Chromosome
2. Start position
3. End position
4. Strandedness of the gene
5. gene name
6. Counts per million (CPM) for endocrine cells 1 day old chip1
7. Counts per million (CPM) for endocrine cells 1 day old chip2
8. Counts per million (CPM) for endocrine cells 15 days old chip1
9. Counts per million (CPM) for endocrine cells 15 days old chip2
10. Counts per million (CPM) for endocrine cells 40 days old chip2
11. Counts per million (CPM) for endocrine cells 40 days old chip2
Table S10: Gene count table for genes within peaks for enterocytes
calculated using bedtools intersect -c on fragment file and genes in peaks list and then normalized as counts per million (CPM)
columns in this table:
1. Chromosome
2. Start position
3. End position
4. Strandedness of the gene
5. gene name
6. Counts per million (CPM) for enterocytes 1 day old chip1
7. Counts per million (CPM) for enterocytes 1 day old chip2
8. Counts per million (CPM) for enterocytes 15 days old chip1
9. Counts per million (CPM) for enterocytes 15 days old chip2
10. Counts per million (CPM) for enterocytes 40 days old chip2
11. Counts per million (CPM) for enterocytes 40 days old chip2
Table S11: Results from differential analysis of genes between 1 day old cell types performed on the Degust server https://degust.erc.monash.edu/
performed differential analysis between all 1 day old cell types
columns in this table:
1. Chromosome
2. Start position
3. End position
4. Strandedness of the gene
5. gene name
6. FDR value
7. Average methylation count
8. P value
9. Counts per million (CPM) for enterocytes 1 day old chip1 calculated in degust
10. Counts per million (CPM) for enterocytes 1 day old chip2 calculated in degust
11. Counts per million (CPM) for endocrine cells 1 day old chip1 calculated in degust
12. Counts per million (CPM) for endocrine cells 1 day old chip2 calculated in degust
13. Counts per million (CPM) for ISC/EBs 1 day old chip1 calculated in degust
14. Counts per million (CPM) for ISC/EBs 1 day old chip2 calculated in degust
Table S12: Results from differential analysis of genes between 1 day old and 40 days old ISC/EBs performed on the Degust server https://degust.erc.monash.edu/
columns in this table:
1. Chromosome
2. Start position
3. End position
4. Strandedness of the gene
5. gene name
6. Fold change of ISC/EBs 1 day old
7. Fold change of ISC/EBs 40 days old
8. FDR value
9. Average methylation count
10. P value
11. Counts per million (CPM) for ISC/EBs 1 day old chip1 calculated in degust
12. Counts per million (CPM) for ISC/EBs 1 day old chip2 calculated in degust
13. Counts per million (CPM) for ISC/EBs 15 days old chip1 calculated in degust
14. Counts per million (CPM) for ISC/EBs 15 days old chip2 calculated in degust
15. Counts per million (CPM) for ISC/EBs 40 days old chip1 calculated in degust
16. Counts per million (CPM) for ISC/EBs 40 days old chip2 calculated in degust
Table S13: Results from differential analysis of genes between 1 day old and 40 days old enteroendocrine cells performed on the Degust server https://degust.erc.monash.edu/
columns in this table:
1. Chromosome
2. Start position
3. End position
4. Strandedness of the gene
5. gene name
6. Fold change of endocrine cells 1 day old
7. Fold change of endocrine cells 40 days old
8. FDR value
9. Average methylation count
10. P value
11. Counts per million (CPM) for endocrine cells 1 day old chip1 calculated in degust
12. Counts per million (CPM) for endocrine cells 1 day old chip2 calculated in degust
13. Counts per million (CPM) for endocrine cells 15 days old chip1 calculated in degust
14. Counts per million (CPM) for endocrine cells 15 days old chip2 calculated in degust
15. Counts per million (CPM) for endocrine cells 40 days old chip1 calculated in degust
16. Counts per million (CPM) for endocrine cells 40 days old chip2 calculated in degust
Table S14: Results from differential analysis of genes between 1 day old and 40 days old enterocytes performed on the Degust server https://degust.erc.monash.edu/
columns in this table:
1. Chromosome
2. Start position
3. End position
4. Strandedness of the gene
5. gene name
6. Fold change of enterocytes 1 day old
7. Fold change of enterocytes 40 days old
8. FDR value
9. Average methylation count
10. P value
11. Counts per million (CPM) for enterocytes 1 day old chip1 calculated in degust
12. Counts per million (CPM) for enterocytes 1 day old chip2 calculated in degust
13. Counts per million (CPM) for enterocytes 15 days old chip1 calculated in degust
14. Counts per million (CPM) for enterocytes 15 days old chip2 calculated in degust
15. Counts per million (CPM) for enterocytes 40 days old chip1 calculated in degust
16. Counts per million (CPM) for enterocytes 40 days old chip2 calculated in degust
Table S15: Results from Gene Ontology analysis for genes that lose H3K27me3 signal in aged ISC/EBs
columns in this table:
1. GO ID
2. Description of GO term
3. Gene Ratio
4. pvalue
5. p.adjust
6. qvalue
7. Gene Count
8. list of genes that fall into GO term
Table S16: Results from Gene Ontology analysis for genes that lose H3K27me3 signal in aged enteroendocrine cells
columns in this table:
1. GO ID
2. Description of GO term
3. Gene Ratio
4. pvalue
5. p.adjust
6. qvalue
7. Gene Count
8. list of genes that fall into GO term
Table S17: Results from differential analysis for STARR-seq enhancers (Zabidi et al. 2015) between 1 day old and 40 days old ISC/EBs performed on the Degust server
columns in this table:
1. Chromosome
2. Start position
3. End position
4. Name of enhancer in peak
5. Fold change of endocrine cells 1 day old
6. Fold change of endocrine cells 40 days old
7. FDR value
8. Average methylation count
9. P value
10. Counts per million (CPM) for ISC/EBs 1 day old chip1 calculated in degust
11. Counts per million (CPM) for ISC/EBs 1 day old chip2 calculated in degust
12. Counts per million (CPM) for ISC/EBs 15 days old chip1 calculated in degust
13. Counts per million (CPM) for ISC/EBs 15 days old chip2 calculated in degust
14. Counts per million (CPM) for ISC/EBs 40 days old chip1 calculated in degust
15. Counts per million (CPM) for ISC/EBs 40 days old chip2 calculated in degust
Table S18: Results from differential analysis for STARR-seq enhancers (Zabidi et al. 2015) between 1 day old and 40 days old enterocytes performed on Degust server
columns in this table:
1. Chromosome
2. Start position
3. End position
4. Name of enhancer in peak
5. Fold change of endocrine cells 1 day old
6. Fold change of endocrine cells 40 days old
7. FDR value
8. Average methylation count
9. P value
10. Counts per million (CPM) for enterocytes 1 day old chip1 calculated in degust
11. Counts per million (CPM) for enterocytes 1 day old chip2 calculated in degust
12. Counts per million (CPM) for enterocytes 15 days old chip1 calculated in degust
13. Counts per million (CPM) for enterocytes 15 days old chip2 calculated in degust
14. Counts per million (CPM) for enterocytes 40 days old chip1 calculated in degust
15. Counts per million (CPM) for enterocytes 40 days old chip2 calculated in degust
Table S19: Results from Gene Ontology analysis for genes that lose H3K27me3 signal in aged enterocytes
columns in this table:
1. GO ID
2. Description of GO term
3. Gene Ratio
4. pvalue
5. p.adjust
6. qvalue
7. Gene Count
8. list of genes that fall into GO term
Table S20: Results from Gene Ontology analysis for genes that gain H3K27me3 signal in aged enterocytes
columns in this table:
1. GO ID
2. Description of GO term
3. Gene Ratio
4. pvalue
5. p.adjust
6. qvalue
7. Gene Count
8. list of genes that fall into GO term
Table S21: Cell type counts from single-cell RNA-seq data (15) for chitin genes
Counts of cells by cell type that express chitin genes from single-cell RNA-seq data
Table S22: Promoter count tables for RNAPIIS5P
calculated using bedtools intersect -c on fragment file and genes in peaks list and then normalized as counts per million (CPM)
columns in this table:
1. Chromosome
2. Start position
3. End position
4. Strandedness of the gene
5. promoter name
6. Gene_ID
7. average counts per million (CPM) for four replicates of 1 day old RNAPIIS5P
8. average counts per million (CPM) for four replicates of 15 days old RNAPIIS5P
9. average counts per million (CPM) for four replicates of 40 days old RNAPIIS5P
Table S23: Cell counts from single-cell RNA-seq from Tauc et al
Number of cells per cell type by age from single-cell RNA-seq reported in Tauc et al
1. Cell type annotation
2. Number of cells
3. Age
Table S24: Results from differential analysis of RNAPIIS5P at promoters between 1 day old and 40 days tissues performed on the Degust server https://degust.erc.monash.edu/
columns in this table:
1. Chromosome
2. Start position
3. End position
4. Strandedness of the gene
5. promoter name
6. Fold change of 1 day old tissue
7. Fold change of 40 days old tissue
8. FDR value
9. Average RNAPIIS5P count
10. P value
11. Counts per million (CPM) for 1 day old samples rep1
12. Counts per million (CPM) for 1 day old samples rep2
13. Counts per million (CPM) for 1 day old samples rep3
14. Counts per million (CPM) for 1 day old samples rep4
15. Counts per million (CPM) for 15 days old samples rep1
16. Counts per million (CPM) for 15 days old samples rep2
17. Counts per million (CPM) for 15 days old samples rep3
18. Counts per million (CPM) for 15 days old samples rep4
19. Counts per million (CPM) for 40 days old samples rep1
20. Counts per million (CPM) for 40 days old samples rep2
21. Counts per million (CPM) for 40 days old samples rep3
22. Counts per million (CPM) for 40 days old samples rep4
Table S25: Promoter count tables for Pc
calculated using bedtools intersect -c on fragment file and genes in peaks list and then normalized as counts per million (CPM)
columns in this table:
1. Chromosome
2. Start position
3. End position
4. Strandedness of the gene
5. promoter name
6. Gene_ID
7. average counts per million (CPM) for four replicates of 1 day old Pc
8. average counts per million (CPM) for four replicates of 15 days old Pc
9. average counts per million (CPM) for four replicates of 40 days old Pc
Table S26: Pc signal vs IgG for selected promoters from Supplemental Figure S7
calculated using Kent-tools bigWigAverageOverbed usign individual bigwig files for Pc and IgG
1. Promoter name
2. Age of sample
3. Average area under the curve value for Pc for 4 replicates
4. Average area under the curve value for IgG for 2 replicates
5. Fold change between mean Pc sigal and IgG signal (Pc/IgG)
6. Log2 fold change between the mean Pc signal and IgG signal (log2(Pc/IgG))

## Sheet: Table_S1_samples
SciCUT&Tag H3K27me3
Sample_ID	Sample_name	Raw_reads	Clipped_reads	Fragments	deduplicated_fragments
SL_Dm6_gut_H3K27me3_1doC1_240313	sci_H3K27me3_1_day_old_chip1	22330320	22281530	20798003	4499077
SL_Dm6_gut_H3K27me3_1doC2_240313	sci_H3K27me3_1_day_old_chip2	24752249	24689393	23095734	7961772
SL_Dm6_gut_H3K27me3_15doC1_240313	sci_H3K27me3_15_days_old_chip1	49626728	48922312	45268750	9428390
SL_Dm6_gut_H3K27me3_15doC2_240313	sci_H3K27me3_15_days_old_chip2	53052264	51980880	48117178	16272606
SL_Dm6_gut_H3K27me3_40doC1_240313	sci_H3K27me3_40_days_old_chip1	29344801	29232183	26850531	5676626
SL_Dm6_gut_H3K27me3_40doC2_240313	sci_H3K27me3_40_days_old_chip2	31180491	31042435	28556106	9663508
CUTAC RNAPIIS5P
Sample_ID	Sample_name	Raw reads	Clipped_reads	Fragments	chrM_fraction	fraction_mapped	fraction_duplicated	estimated library size
SL_Dm_masked_transposons_S5P_1do_558	RNAPIIS5P_1_day_old_rep1	6968539	6962717	5049431	0.006	0.725	0.446879	3606194
SL_Dm_masked_transposons_S5P_1do_559	RNAPIIS5P_1_day_old_rep2	7932993	7926890	6584081	0.003	0.831	0.463419	4348512
SL_Dm_masked_transposons_S5P_1do_560	RNAPIIS5P_1_day_old_rep3	8073963	8067948	6725883	0.003	0.834	0.486003	4184005
SL_Dm_masked_transposons_S5P_1do_595	RNAPIIS5P_1_day_old_rep4	1852819	1850712	1652651	0.003	0.893	0.503789	1362417
SL_Dm_masked_transposons_S5P_15do_626	RNAPIIS5P_15_days_old_rep1	1489020	1485409	1307683	0.002	0.88	0.472537	839380
SL_Dm_masked_transposons_S5P_15do_627	RNAPIIS5P_15_days_old_rep2	1719230	1716406	1517148	0.003	0.884	0.494672	971263
SL_Dm_masked_transposons_S5P_15do_628	RNAPIIS5P_15_days_old_rep3	1929149	1926041	1722368	0.004	0.894	0.495342	1185422
SL_Dm_masked_transposons_S5P_15do_641	RNAPIIS5P_15_days_old_rep4	3749080	3745773	3351338	0.001	0.895	0.474169	2532953
SL_Dm_masked_transposons_S5P_40do_589	RNAPIIS5P_40_days_old_rep1	7420965	7414302	6607955	0.006	0.891	0.091158	4692768
SL_Dm_masked_transposons_S5P_40do_590	RNAPIIS5P_40_days_old_rep2	8501410	8493773	7505963	0.006	0.884	0.464976	5229642
SL_Dm_masked_transposons_S5P_40do_591	RNAPIIS5P_40_days_old_rep3	4479878	4475273	3920346	0.002	0.876	0.470271	2834006
SL_Dm_masked_transposons_S5P_40do_592	RNAPIIS5P_40_days_old_rep4	4499312	4495009	4002058	0.011	0.89	0.459821	2977409
CUTAC Pc
Sample_ID	Sample_name	Raw reads	Clipped_reads	Fragments	chrM_fraction	fraction_mapped	fraction_duplicated	estimated library size
SL_Dm_masked_transposons_rDNA_1do_Pc_726	Pc_1_day_old_rep1	8127552	8117212	7142399	0.044	0.88	0.603814	3284186
SL_Dm_masked_transposons_rDNA_1do_Pc_727	Pc_1_day_old_rep2	7235695	7226592	5745031	0.029	0.795	0.603781	2635541
SL_Dm_masked_transposons_rDNA_1do_Pc_728	Pc_1_day_old_rep3	11184323	11168834	8678648	0.025	0.777	0.590226	4184090
SL_Dm_masked_transposons_rDNA_1do_Pc_729	Pc_1_day_old_rep4	7508217	7498529	5831919	0.018	0.778	0.581063	2896197
SL_Dm_masked_transposons_rDNA_15do_Pc_722	Pc_15_days_old_rep1	11284612	11267936	8869273	0.024	0.787	0.584238	4361943
SL_Dm_masked_transposons_rDNA_15do_Pc_723	Pc_15_days_old_rep2	9595495	9581102	8320593	0.022	0.868	0.614782	3674721
SL_Dm_masked_transposons_rDNA_15do_Pc_724	Pc_15_days_old_rep3	10055713	10041656	6809695	0.034	0.678	0.60346	3134997
SL_Dm_masked_transposons_rDNA_15do_Pc_725	Pc_15_days_old_rep4	3261357	3257019	2496202	0.014	0.766	0.544756	1409079
SL_Dm_masked_transposons_rDNA_40do_Pc_718	Pc_40_days_old_rep1	10002373	9989179	6145936	0.037	0.615	0.594836	2913600
SL_Dm_masked_transposons_rDNA_40do_Pc_719	Pc_40_days_old_rep2	16686529	16666441	8898139	0.037	0.534	0.616928	3897301
SL_Dm_masked_transposons_rDNA_40do_Pc_720	Pc_40_days_old_rep3	12330750	12312286	9974630	0.042	0.81	0.60663	4554613
SL_Dm_masked_transposons_rDNA_40do_Pc_721	Pc_40_days_old_rep4	8897783	8886022	6412558	0.037	0.722	0.612106	2857337
SL_Dm_masked_transposons_265_IgG	IgG_rep1	295889	295304	246518	0.042	0.833144
SL_Dm_masked_transposons_319_IgG_15do	IgG_rep2	3101423	3094806	2517692	0.184	0.811786

## Sheet: Table_S2_SEACR_Peaks
chr	start	end
chr2L	2	16955
chr2L	25540	65242
chr2L	263300	271534
chr2L	284415	293213
chr2L	314451	340541
chr2L	347935	408579
chr2L	421039	432254
chr2L	478685	563633
chr2L	573707	813272
chr2L	827168	869012
chr2L	870780	975690
chr2L	977928	1008344
chr2L	1012343	1051792
chr2L	1083170	1114680
chr2L	1126962	1140783
chr2L	1196994	1514510
chr2L	1518568	1552692
chr2L	1556153	1717324
chr2L	1731276	1887173
chr2L	1930592	1979158
chr2L	1988147	2008100
chr2L	2012700	2063827
chr2L	2067383	2098428
chr2L	2100424	2109528
chr2L	2113596	2131625
chr2L	2177848	2191218
chr2L	2196137	2206453
chr2L	2234926	2358979
chr2L	2382862	2493392
chr2L	2506816	2537359
chr2L	2541202	2565580
chr2L	2585992	2615995
chr2L	2621586	2661256
chr2L	2663030	2689872
chr2L	2696703	2729915
chr2L	2773332	2785696
chr2L	2791467	2834830
chr2L	2836898	2856550
chr2L	2954340	2964314
chr2L	3009723	3019210
chr2L	3042755	3056997
chr2L	3121847	3145849
chr2L	3175610	3184351
chr2L	3187044	3202785
chr2L	3212525	3291012
chr2L	3320172	3340031
chr2L	3379013	3396499
chr2L	3423515	3433515
chr2L	3438498	3448841
chr2L	3480758	3490528
chr2L	3519565	3618709
chr2L	3630125	3637540
chr2L	3637931	3644742
chr2L	3657195	3704269
chr2L	3712584	3728266
chr2L	3743532	3765089
chr2L	3776823	3787678
chr2L	3791507	3800144
chr2L	3810811	3886793
chr2L	3895765	3903416
chr2L	3908406	3930279
chr2L	3932830	3943568
chr2L	3949985	3959889
chr2L	3966229	3992185
chr2L	4007525	4012239
chr2L	4019471	4025265
chr2L	4097090	4102214
chr2L	4118403	4125217
chr2L	4128067	4135848
chr2L	4141380	4147751
chr2L	4160307	4179674
chr2L	4197624	4218409
chr2L	4227383	4386124
chr2L	4404155	4423130
chr2L	4465111	4590564
chr2L	4595891	4601131
chr2L	4613890	4692077
chr2L	4700506	4751169
chr2L	4753784	4794396
chr2L	4795743	4811272
chr2L	4854112	4873203
chr2L	4888679	4891345
chr2L	4891384	4946660
chr2L	4951675	4966450
chr2L	5010524	5040619
chr2L	5105492	5114169
chr2L	5120987	5144069
chr2L	5209368	5218850
chr2L	5326909	5517708
chr2L	5549610	5617468
chr2L	5618958	5717966
chr2L	5724568	5755139
chr2L	5762141	5764975
chr2L	5780335	5791979
chr2L	5810725	5824639
chr2L	5827452	5851240
chr2L	5854328	5863170
chr2L	5866692	5900501
chr2L	5922149	5939337
chr2L	5965450	5971695
chr2L	6003602	6024777
chr2L	6027807	6035812
chr2L	6109367	6122687
chr2L	6124860	6134839
chr2L	6138359	6157932
chr2L	6165323	6253687
chr2L	6258646	6322778
chr2L	6348555	6426182
chr2L	6431564	6446312
chr2L	6526956	6557204
chr2L	6571968	6612160
chr2L	6622588	6632813
chr2L	6684731	6709407
chr2L	6711380	6717273
chr2L	6732810	6750180
chr2L	6751956	6777988
chr2L	6779024	6789959
chr2L	6792554	6853718
chr2L	6855454	6906975
chr2L	6931297	6942999
chr2L	6972224	6997483
chr2L	7005504	7013876
chr2L	7064753	7074876
chr2L	7085073	7096061
chr2L	7099473	7116700
chr2L	7131522	7152872
chr2L	7158823	7168811
chr2L	7242820	7264451
chr2L	7268570	7344819
chr2L	7347958	7384328
chr2L	7387545	7398153
chr2L	7441437	7450265
chr2L	7452588	7463328
chr2L	7534659	7540148
chr2L	7548143	7557638
chr2L	7595518	7623429
chr2L	7641703	7676329
chr2L	7685302	7696527
chr2L	7703800	7711759
chr2L	7713981	7727092
chr2L	7740522	7768006
chr2L	7770777	7778976
chr2L	7839347	7879856
chr2L	7893817	7900788
chr2L	7932229	7942267
chr2L	8018861	8029063
chr2L	8159854	8181698
chr2L	8204366	8209465
chr2L	8238156	8259395
chr2L	8453483	8461587
chr2L	8464376	8506347
chr2L	8519662	8525608
chr2L	8549911	8581430
chr2L	8602467	8634197
chr2L	8643574	8659255
chr2L	8671988	8683699
chr2L	8742185	8904428
chr2L	8912821	8932754
chr2L	8959259	8967065
chr2L	8968726	8976077
chr2L	9009982	9067813
chr2L	9070785	9076709
chr2L	9078644	9103727
chr2L	9106222	9121401
chr2L	9218068	9222746
chr2L	9251530	9273812
chr2L	9280091	9312096
chr2L	9326934	9330407
chr2L	9335245	9364229
chr2L	9376337	9387370
chr2L	9393568	9397015
chr2L	9401447	9410279
chr2L	9421025	9426396
chr2L	9464354	9475099
chr2L	9542536	9567281
chr2L	9570248	9613068
chr2L	9618973	9671379
chr2L	9716283	9753030
chr2L	9763320	9784721
chr2L	9797032	9808099
chr2L	9827681	9837662
chr2L	9843160	9855392
chr2L	9857772	9867876
chr2L	9898033	9905746
chr2L	9921224	9931999
chr2L	9974847	9980842
chr2L	10015563	10044472
chr2L	10048411	10053493
chr2L	10064032	10118279
chr2L	10121347	10144134
chr2L	10156377	10163791
chr2L	10175641	10199502
chr2L	10450510	10473522
chr2L	10531650	10538896
chr2L	10594325	10600500
chr2L	10627762	10673149
chr2L	10676454	10679567
chr2L	10691243	10721278
chr2L	10755911	10764989
chr2L	10767242	10795247
chr2L	10803147	10834720
chr2L	10871933	10889531
chr2L	10891711	10964955
chr2L	11020455	11028695
chr2L	11056752	11063429
chr2L	11063969	11090947
chr2L	11135685	11146157
chr2L	11156878	11168634
chr2L	11172369	11215123
chr2L	11218747	11263522
chr2L	11282002	11466663
chr2L	11468027	11479907
chr2L	11481374	11499511
chr2L	11516135	11536062
chr2L	11541473	11547986
chr2L	11561185	11594656
chr2L	11598972	11605629
chr2L	11609669	11615351
chr2L	11621063	11668515
chr2L	11668695	11674804
chr2L	11682429	11707255
chr2L	11711911	11720975
chr2L	11722177	11746271
chr2L	11747764	11764403
chr2L	11766809	11772793
chr2L	11775203	11781261
chr2L	11787220	11798125
chr2L	11815874	11828443
chr2L	11841610	11856302
chr2L	11876038	11900009
chr2L	11904113	11913626
chr2L	11918820	11931723
chr2L	11943389	11949470
chr2L	11963533	11972030
chr2L	12002926	12012957
chr2L	12021190	12038696
chr2L	12074448	12093484
chr2L	12107487	12136390
chr2L	12189893	12194734
chr2L	12238780	12242018
chr2L	12269960	12319076
chr2L	12322479	12329034
chr2L	12334733	12358997
chr2L	12403223	12419469
chr2L	12558375	12605951
chr2L	12609683	12628061
chr2L	12632426	12640906
chr2L	12642286	12686387
chr2L	12731120	12735798
chr2L	12739276	12743935
chr2L	12750226	12767534
chr2L	12777455	12797319
chr2L	12803210	12836638
chr2L	12839317	12853976
chr2L	12858039	12863160
chr2L	12868969	12897361
chr2L	12901937	12945723
chr2L	12952462	12973325
chr2L	12985379	12991763
chr2L	13028833	13043759
chr2L	13045338	13055426
chr2L	13057043	13070410
chr2L	13081767	13091262
chr2L	13094889	13111635
chr2L	13116321	13123653
chr2L	13129552	13166207
chr2L	13224561	13246432
chr2L	13255223	13282329
chr2L	13301969	13328919
chr2L	13333830	13365198
chr2L	13395470	13398758
chr2L	13405708	13410392
chr2L	13421539	13433711
chr2L	13446026	13500114
chr2L	13519623	13544425
chr2L	13560511	13565192
chr2L	13593658	13597111
chr2L	13615516	13624185
chr2L	13673904	13713470
chr2L	13716627	13757880
chr2L	13842354	13871839
chr2L	13912053	13924072
chr2L	13932459	13947914
chr2L	13950898	14008300
chr2L	14014253	14021206
chr2L	14022767	14089404
chr2L	14099581	14112962
chr2L	14114498	14145919
chr2L	14146131	14184554
chr2L	14208719	14223722
chr2L	14227274	14244003
chr2L	14252344	14261621
chr2L	14281926	14307940
chr2L	14311911	14326329
chr2L	14328304	14334782
chr2L	14367581	14397774
chr2L	14401388	14491483
chr2L	14493834	14611330
chr2L	14642175	14656932
chr2L	14704528	14709924
chr2L	14713375	14737067
chr2L	14742793	14758589
chr2L	14760614	14776861
chr2L	14778299	14798008
chr2L	14809096	14817860
chr2L	14828313	14848370
chr2L	14852037	14856880
chr2L	14861229	14867957
chr2L	14874320	14881473
chr2L	14888484	14895137
chr2L	14904234	14913670
chr2L	14918889	14968271
chr2L	14983669	14990551
chr2L	15014713	15034743
chr2L	15067756	15072045
chr2L	15074268	15105280
chr2L	15106799	15110790
chr2L	15125681	15142677
chr2L	15144488	15162140
chr2L	15164046	15168979
chr2L	15172358	15193879
chr2L	15201661	15210812
chr2L	15213872	15220246
chr2L	15228314	15233246
chr2L	15250149	15254374
chr2L	15275310	15526757
chr2L	15530826	15597016
chr2L	15600666	15606147
chr2L	15610203	15616928
chr2L	15620018	15643082
chr2L	15645591	15653660
chr2L	15660326	15678622
chr2L	15683776	15691438
chr2L	15695323	15709634
chr2L	15715001	15723163
chr2L	15782561	15798269
chr2L	15802476	15810834
chr2L	15829263	15849184
chr2L	15851451	15864933
chr2L	15873645	15902612
chr2L	15908757	15928661
chr2L	15940328	15958627
chr2L	15959716	15970270
chr2L	15978790	15994131
chr2L	16013911	16040795
chr2L	16043650	16060739
chr2L	16063135	16074722
chr2L	16076085	16084251
chr2L	16090380	16105273
chr2L	16115524	16125760
chr2L	16131204	16137052
chr2L	16163922	16178722
chr2L	16181575	16190478
chr2L	16201363	16206829
chr2L	16213488	16241188
chr2L	16369021	16384835
chr2L	16386442	16493058
chr2L	16513423	16519080
chr2L	16552707	16561716
chr2L	16663467	16670469
chr2L	16753522	16762935
chr2L	16764943	16793782
chr2L	16799456	16817323
chr2L	16830083	16838917
chr2L	16868734	16875565
chr2L	16917333	16967018
chr2L	16969525	16996163
chr2L	17006200	17016757
chr2L	17022578	17052328
chr2L	17068684	17097150
chr2L	17124042	17134112
chr2L	17145821	17187542
chr2L	17189850	17200625
chr2L	17203555	17210538
chr2L	17216261	17229082
chr2L	17233637	17244906
chr2L	17256575	17269392
chr2L	17273278	17277953
chr2L	17284661	17296846
chr2L	17303137	17314861
chr2L	17318974	17335507
chr2L	17338668	17346951
chr2L	17356754	17366591
chr2L	17382350	17388487
chr2L	17450898	17456355
chr2L	17485725	17566577
chr2L	17583704	17602762
chr2L	17605658	17611576
chr2L	17614105	17644419
chr2L	17653678	17692231
chr2L	17698526	17706192
chr2L	17717006	17760189
chr2L	17770380	17776270
chr2L	17783666	17806809
chr2L	17827987	17875114
chr2L	17883886	17911286
chr2L	17916704	17931622
chr2L	17939855	17954840
chr2L	17974270	18024333
chr2L	18028688	18105055
chr2L	18159619	18211713
chr2L	18216046	18275341
chr2L	18283095	18288587
chr2L	18292791	18326746
chr2L	18364209	18386909
chr2L	18402072	18440329
chr2L	18487734	18508960
chr2L	18520306	18533170
chr2L	18633701	18638384
chr2L	18663610	18674989
chr2L	18707974	18831750
chr2L	18837924	18845491
chr2L	18859656	18937372
chr2L	18988140	19028191
chr2L	19055354	19120573
chr2L	19191377	19208085
chr2L	19210328	19357175
chr2L	19365647	19383347
chr2L	19455701	19486597
chr2L	19507334	19525478
chr2L	19553148	19565486
chr2L	19610170	19633180
chr2L	19637917	19648416
chr2L	19657679	19673154
chr2L	19677984	19686739
chr2L	19688779	19712674
chr2L	19720944	19731790
chr2L	19823657	19831871
chr2L	19833270	19937194
chr2L	19958520	20023859
chr2L	20030170	20057765
chr2L	20066050	20079557
chr2L	20104241	20155781
chr2L	20164277	20172626
chr2L	20174703	20218220
chr2L	20223388	20270851
chr2L	20272780	20286899
chr2L	20288577	20310632
chr2L	20361176	20398334
chr2L	20405598	20416787
chr2L	20470778	20479006
chr2L	20482438	20594817
chr2L	20608237	20637054
chr2L	20683538	20733072
chr2L	20757882	20788799
chr2L	20808408	20824770
chr2L	20829448	20859023
chr2L	20891630	20897432
chr2L	20946312	20962906
chr2L	20976716	20981416
chr2L	21063393	21078731
chr2L	21089202	21096276
chr2L	21182864	21192382
chr2L	21194198	21200937
chr2L	21203479	21211761
chr2L	21325568	21334297
chr2L	21337588	21342858
chr2L	21347603	21355018
chr2L	21358068	21377802
chr2L	21384081	21390944
chr2L	21396599	21551245
chr2L	21552837	21559188
chr2L	21577208	21596433
chr2L	21652738	21657182
chr2L	21691872	21718387
chr2L	21721594	21729402
chr2L	21761753	21792795
chr2L	21793656	22094441
chr2L	22096898	22112149
chr2L	22115474	22118993
chr2L	22180339	22200122
chr2L	22201452	22234298
chr2L	22258714	22260731
chr2L	22263549	22296057
chr2L	22298330	22310199
chr2L	22311790	22336195
chr2L	22338737	22522583
chr2L	22523704	22533804
chr2L	22551714	22573787
chr2L	22587490	22594050
chr2L	22595503	22603119
chr2L	22605665	22618363
chr2L	22621432	22749146
chr2L	22757450	22765148
chr2L	22766392	22776472
chr2L	22778210	22785402
chr2L	22786843	22842527
chr2L	22855180	22888634
chr2L	22894326	22924347
chr2L	22929988	22938589
chr2L	22948382	22976966
chr2L	22999598	23016506
chr2L	23030648	23066286
chr2L	23069930	23105331
chr2L	23110511	23139668
chr2L	23180491	23199565
chr2L	23209889	23252176
chr2L	23257886	23267981
chr2L	23274109	23415538
chr2L	23417436	23472428
chr2L	23474175	23493180
chr2L	23497253	23511059
chr2R	0	68101
chr2R	73519	79854
chr2R	87414	237156
chr2R	238615	292259
chr2R	295301	317125
chr2R	330743	360863
chr2R	370502	416879
chr2R	422885	524464
chr2R	527678	536477
chr2R	537945	577963
chr2R	579427	589473
chr2R	593715	602948
chr2R	605243	610969
chr2R	620757	630252
chr2R	635390	668569
chr2R	668887	692184
chr2R	695862	699788
chr2R	705932	746444
chr2R	752608	758788
chr2R	764480	795699
chr2R	810553	867611
chr2R	870228	900554
chr2R	904388	947551
chr2R	952680	1071716
chr2R	1082410	1087091
chr2R	1097499	1101926
chr2R	1114677	1211303
chr2R	1215688	1260277
chr2R	1269138	1330415
chr2R	1330470	1339442
chr2R	1350860	1487072
chr2R	1492631	1522732
chr2R	1528369	1560203
chr2R	1562614	1589897
chr2R	1594955	1603654
chr2R	1609663	1630443
chr2R	1633621	1645677
chr2R	1648649	1654258
chr2R	1654623	1728629
chr2R	1728695	1756116
chr2R	1757694	1772455
chr2R	1775222	1840209
chr2R	1846603	1860081
chr2R	1873206	1878858
chr2R	1882000	1965413
chr2R	1968388	1995004
chr2R	1996237	2093213
chr2R	2097615	2249011
chr2R	2263208	2281153
chr2R	2287743	2388285
chr2R	2390877	2428081
chr2R	2439236	2445111
chr2R	2455531	2487443
chr2R	2498981	2508130
chr2R	2509634	2516940
chr2R	2533903	2552289
chr2R	2567392	2606433
chr2R	2608353	2651050
chr2R	2653755	2700012
chr2R	2701334	2770351
chr2R	2776445	2787826
chr2R	2796964	2821605
chr2R	2823278	2831423
chr2R	2831497	2842351
chr2R	2848790	2855640
chr2R	2858438	2905706
chr2R	2907689	2964239
chr2R	2966037	3030721
chr2R	3033172	3072660
chr2R	3074305	3114995
chr2R	3116917	3140570
chr2R	3141495	3202600
chr2R	3205016	3214633
chr2R	3227647	3235270
chr2R	3245957	3254639
chr2R	3264747	3270397
chr2R	3282908	3405396
chr2R	3409831	3425033
chr2R	3426210	3531346
chr2R	3537732	3581465
chr2R	3583242	3590926
chr2R	3594036	3647511
chr2R	3647992	3694485
chr2R	3701988	3900022
chr2R	3908907	3913944
chr2R	3956373	3961257
chr2R	3967245	3973898
chr2R	3996504	4013003
chr2R	4018448	4024498
chr2R	4034560	4116168
chr2R	4122180	4132781
chr2R	4134442	4187297
chr2R	4191168	4219379
chr2R	4224927	4235605
chr2R	4244359	4269224
chr2R	4288702	4300693
chr2R	4305947	4322880
chr2R	4323835	4353112
chr2R	4360644	4375240
chr2R	4388409	4402591
chr2R	4406138	4425872
chr2R	4470574	4507913
chr2R	4514064	4545169
chr2R	4552164	4557299
chr2R	4565633	4585612
chr2R	4589585	4592261
chr2R	4618705	4639146
chr2R	4642803	4649999
chr2R	4651132	4659192
chr2R	4673625	4691284
chr2R	4729649	4743323
chr2R	4763493	4782625
chr2R	4791286	4816923
chr2R	4831655	4873030
chr2R	4879461	4923580
chr2R	4926002	4959340
chr2R	4961214	5023156
chr2R	5025035	5034197
chr2R	5035770	5068599
chr2R	5068710	5089298
chr2R	5093512	5117251
chr2R	5131246	5140701
chr2R	5157461	5168069
chr2R	5172125	5179095
chr2R	5222911	5237613
chr2R	5252251	5258637
chr2R	5268110	5291728
chr2R	5329572	5338468
chr2R	5342267	5349886
chr2R	5367289	5378327
chr2R	5379715	5397184
chr2R	5399212	5440229
chr2R	5440356	5493712
chr2R	5498363	5512024
chr2R	5515048	5529851
chr2R	5531440	5560327
chr2R	5566370	5604202
chr2R	5610943	5637133
chr2R	5676344	5686887
chr2R	5705317	5753823
chr2R	5785598	5880366
chr2R	5886830	5964110
chr2R	6035073	6041535
chr2R	6046623	6073873
chr2R	6096779	6101890
chr2R	6189841	6199060
chr2R	6259795	6411090
chr2R	6415326	6461051
chr2R	6463533	6611784
chr2R	6711217	6739695
chr2R	6767564	6779813
chr2R	6786725	6865813
chr2R	6885274	6925078
chr2R	6944520	6958319
chr2R	7032315	7042624
chr2R	7067571	7192760
chr2R	7196644	7209894
chr2R	7217594	7240870
chr2R	7246230	7268579
chr2R	7276285	7318718
chr2R	7328021	7368221
chr2R	7402423	7447239
chr2R	7541844	7561760
chr2R	7608482	7613572
chr2R	7636035	7648040
chr2R	7815332	7822144
chr2R	7831619	7888857
chr2R	7890627	7914062
chr2R	7988472	8015705
chr2R	8017666	8062353
chr2R	8186622	8232874
chr2R	8251913	8326625
chr2R	8328311	8422341
chr2R	8425564	8518665
chr2R	8520784	8612031
chr2R	8625358	8665264
chr2R	8684118	8715738
chr2R	8729506	8855963
chr2R	8861821	8891502
chr2R	8964949	8989224
chr2R	8992303	9026585
chr2R	9029317	9094738
chr2R	9148209	9165292
chr2R	9188038	9214079
chr2R	9216420	9246029
chr2R	9310675	9349622
chr2R	9352277	9396891
chr2R	9413083	9424020
chr2R	9453340	9463400
chr2R	9477410	9541947
chr2R	9606850	9618095
chr2R	9619682	9637018
chr2R	9640931	9667970
chr2R	9677843	9684063
chr2R	9697302	9715328
chr2R	9727789	9734741
chr2R	9747694	9758195
chr2R	9759550	9791475
chr2R	9794214	9810592
chr2R	9820502	9831520
chr2R	9898930	9912985
chr2R	9968958	9990184
chr2R	10054265	10065632
chr2R	10077966	10093097
chr2R	10168488	10187426
chr2R	10191598	10202975
chr2R	10229375	10235012
chr2R	10240166	10251423
chr2R	10252888	10261419
chr2R	10263409	10273763
chr2R	10278472	10286277
chr2R	10290310	10305110
chr2R	10310924	10387587
chr2R	10394111	10417619
chr2R	10645354	10658434
chr2R	10670476	10735917
chr2R	10826142	10837872
chr2R	10898184	10906183
chr2R	10909653	10933939
chr2R	10935453	10977893
chr2R	10984532	11065290
chr2R	11073721	11080124
chr2R	11088518	11096987
chr2R	11113433	11118014
chr2R	11126031	11149014
chr2R	11158683	11167032
chr2R	11224049	11245127
chr2R	11246767	11260763
chr2R	11263807	11276530
chr2R	11293814	11301943
chr2R	11307743	11340471
chr2R	11371877	11396001
chr2R	11411272	11440364
chr2R	11442280	11449210
chr2R	11456276	11576189
chr2R	11695329	11801747
chr2R	11803123	11841760
chr2R	11844490	11852229
chr2R	11901355	11935540
chr2R	11952421	11969246
chr2R	11987820	12020577
chr2R	12022144	12025592
chr2R	12047730	12138197
chr2R	12199532	12227452
chr2R	12279240	12317509
chr2R	12350986	12399983
chr2R	12401461	12418945
chr2R	12419699	12423269
chr2R	12452989	12465510
chr2R	12501750	12503804
chr2R	12653594	12663870
chr2R	12682888	12702938
chr2R	12707571	12715877
chr2R	12754327	12783533
chr2R	12789350	12817752
chr2R	12819498	12824504
chr2R	12830489	12849186
chr2R	12862328	12867554
chr2R	12874779	12919681
chr2R	12934886	12944137
chr2R	12947728	13049022
chr2R	13053732	13134933
chr2R	13136936	13141622
chr2R	13245989	13255921
chr2R	13261358	13278582
chr2R	13281898	13292836
chr2R	13296224	13328125
chr2R	13335530	13369656
chr2R	13372800	13409481
chr2R	13507505	13523998
chr2R	13536395	13546300
chr2R	13563035	13568395
chr2R	13603272	13735918
chr2R	13739050	13819808
chr2R	13833406	13841378
chr2R	13905663	13907543
chr2R	14061590	14071442
chr2R	14093495	14107728
chr2R	14188231	14215039
chr2R	14235975	14260945
chr2R	14271450	14293459
chr2R	14363601	14408943
chr2R	14416138	14424628
chr2R	14427332	14480372
chr2R	14563161	14568689
chr2R	14589599	14596979
chr2R	14624530	14652482
chr2R	14652710	14702923
chr2R	14707341	14715674
chr2R	14737533	14745620
chr2R	14769826	14847765
chr2R	14871157	14881626
chr2R	14887281	14896358
chr2R	14909213	14913850
chr2R	14994140	15015506
chr2R	15021332	15070814
chr2R	15075452	15109954
chr2R	15157156	15174107
chr2R	15178197	15190079
chr2R	15218356	15253904
chr2R	15290424	15309488
chr2R	15332212	15339399
chr2R	15349877	15367149
chr2R	15384559	15402642
chr2R	15404339	15511007
chr2R	15543758	15558585
chr2R	15576682	15615916
chr2R	15617446	15655922
chr2R	15684657	15724727
chr2R	15728366	15848338
chr2R	15888964	15896713
chr2R	15943135	15986373
chr2R	16026145	16046731
chr2R	16065034	16078893
chr2R	16110855	16124165
chr2R	16227033	16263454
chr2R	16269287	16292445
chr2R	16295922	16319036
chr2R	16347694	16380250
chr2R	16391312	16422441
chr2R	16431689	16463452
chr2R	16468047	16479716
chr2R	16483517	16515720
chr2R	16528129	16538087
chr2R	16553468	16564704
chr2R	16592244	16606710
chr2R	16609885	16624009
chr2R	16628709	16655392
chr2R	16657373	16669252
chr2R	16731064	16749559
chr2R	16772842	16783131
chr2R	16787606	16814298
chr2R	16816309	16845739
chr2R	16871938	16890834
chr2R	16896379	16916243
chr2R	16932747	16948289
chr2R	16958977	16964012
chr2R	16977223	16987394
chr2R	16994679	17000247
chr2R	17068164	17078517
chr2R	17081647	17092884
chr2R	17121675	17132709
chr2R	17147313	17152265
chr2R	17159935	17202895
chr2R	17215656	17236545
chr2R	17244451	17264549
chr2R	17298593	17308436
chr2R	17330104	17349815
chr2R	17359054	17365780
chr2R	17382831	17392866
chr2R	17407948	17412310
chr2R	17477896	17484363
chr2R	17485973	17515083
chr2R	17604297	17667041
chr2R	17718702	17723612
chr2R	17748939	17757727
chr2R	17798389	17841799
chr2R	17883775	17898618
chr2R	17902255	17917634
chr2R	17921575	17929432
chr2R	17932655	18029255
chr2R	18032606	18039494
chr2R	18046364	18057559
chr2R	18097801	18107873
chr2R	18111746	18115514
chr2R	18180559	18346822
chr2R	18349492	18382356
chr2R	18389681	18399103
chr2R	18450637	18510992
chr2R	18516206	18556902
chr2R	18575853	18581984
chr2R	18590670	18600010
chr2R	18643093	18653353
chr2R	18661098	18673688
chr2R	18678066	18686853
chr2R	18711276	18732844
chr2R	18737969	18750387
chr2R	18782502	18798010
chr2R	18866935	18893669
chr2R	18897767	18932107
chr2R	18934005	18948084
chr2R	18952622	18983002
chr2R	18994278	19066767
chr2R	19073302	19088816
chr2R	19092608	19113392
chr2R	19238731	19286850
chr2R	19317049	19396861
chr2R	19497212	19502729
chr2R	19506102	19518314
chr2R	19529618	19610495
chr2R	19632386	19663878
chr2R	19698532	19724222
chr2R	19729054	19862598
chr2R	19866908	19915397
chr2R	19920709	19942581
chr2R	19947969	20069289
chr2R	20071901	20180369
chr2R	20188424	20222193
chr2R	20230350	20250615
chr2R	20288482	20301956
chr2R	20329629	20392401
chr2R	20392559	20416934
chr2R	20420942	20429883
chr2R	20431867	20438084
chr2R	20441126	20453410
chr2R	20456370	20470777
chr2R	20474228	20525189
chr2R	20534088	20584813
chr2R	20606598	20619209
chr2R	20655579	20662696
chr2R	20670886	20696982
chr2R	20701386	20721856
chr2R	20724220	20744178
chr2R	20747029	20813867
chr2R	20845036	20994535
chr2R	21018866	21024739
chr2R	21059924	21074413
chr2R	21096540	21103492
chr2R	21107862	21123666
chr2R	21218438	21229510
chr2R	21257141	21290941
chr2R	21294983	21310038
chr2R	21341852	21393317
chr2R	21394283	21403911
chr2R	21423280	21437663
chr2R	21521609	21612306
chr2R	21669133	21686032
chr2R	21726893	21767451
chr2R	21769140	21832271
chr2R	21834230	21842702
chr2R	21847193	21949139
chr2R	21950624	21969611
chr2R	21976429	22026440
chr2R	22028256	22034332
chr2R	22037816	22065654
chr2R	22082673	22104354
chr2R	22125390	22184571
chr2R	22198823	22297045
chr2R	22330374	22369561
chr2R	22424543	22479638
chr2R	22525837	22529293
chr2R	22580465	22586577
chr2R	22592796	22600404
chr2R	22608506	22636990
chr2R	22701321	22726357
chr2R	22729048	22755946
chr2R	22757732	22795569
chr2R	22807927	22843457
chr2R	22869087	22881461
chr2R	22895874	22916279
chr2R	22937679	23064481
chr2R	23078278	23183725
chr2R	23205090	23213125
chr2R	23214292	23235215
chr2R	23238551	23358234
chr2R	23402658	23525565
chr2R	23530255	23535363
chr2R	23555320	23676880
chr2R	23680859	23691862
chr2R	23751557	23769251
chr2R	23769333	23807054
chr2R	23914359	23921924
chr2R	23987909	24023097
chr2R	24072667	24087352
chr2R	24113107	24132269
chr2R	24160389	24173586
chr2R	24197525	24392105
chr2R	24400876	24523657
chr2R	24580096	24600780
chr2R	24617475	24648163
chr2R	24653439	24662581
chr2R	24681392	24693739
chr2R	24699027	24727925
chr2R	24735416	24742973
chr2R	24757043	24762107
chr2R	24763666	24765564
chr2R	24785573	24905479
chr2R	24928773	24944887
chr2R	24947501	24954170
chr2R	25010259	25072585
chr2R	25086504	25178340
chr2R	25189323	25193726
chr2R	25193970	25248920
chr2R	25254925	25275151
chr3L	1	19954
chr3L	65539	76274
chr3L	110263	119381
chr3L	174800	182779
chr3L	217273	225526
chr3L	275230	291696
chr3L	357932	441316
chr3L	447852	458958
chr3L	581261	592917
chr3L	607346	628820
chr3L	656510	680885
chr3L	681443	709222
chr3L	709707	731544
chr3L	737439	751068
chr3L	778456	816339
chr3L	838308	855671
chr3L	866490	871074
chr3L	895850	925227
chr3L	932628	992767
chr3L	1039675	1048234
chr3L	1053318	1066779
chr3L	1067543	1151702
chr3L	1154183	1219641
chr3L	1221499	1243590
chr3L	1247706	1262490
chr3L	1270792	1297449
chr3L	1351088	1375457
chr3L	1375703	1464819
chr3L	1468367	1490151
chr3L	1507187	1513814
chr3L	1601051	1646406
chr3L	1667336	1682188
chr3L	1684834	1718384
chr3L	1729645	1774302
chr3L	1806836	1856234
chr3L	1875077	1883555
chr3L	1892054	1915246
chr3L	1917882	1926612
chr3L	1929592	1940621
chr3L	1970293	2013389
chr3L	2019729	2106919
chr3L	2120855	2167095
chr3L	2169547	2216497
chr3L	2221552	2257219
chr3L	2261312	2311849
chr3L	2326430	2372837
chr3L	2382941	2398141
chr3L	2401290	2408922
chr3L	2447120	2456869
chr3L	2462446	2490497
chr3L	2589160	2621699
chr3L	2651411	2684968
chr3L	2688906	2701984
chr3L	2708514	2718873
chr3L	2751523	2755691
chr3L	2864944	2886590
chr3L	2895452	2904157
chr3L	2910255	2927787
chr3L	2936121	2943591
chr3L	2946870	2968010
chr3L	2973653	2983559
chr3L	2986121	3029035
chr3L	3107933	3115359
chr3L	3171554	3177729
chr3L	3251714	3289510
chr3L	3293228	3298953
chr3L	3375378	3389530
chr3L	3394655	3401461
chr3L	3422210	3433710
chr3L	3437098	3446334
chr3L	3485609	3499845
chr3L	3505417	3513094
chr3L	3608836	3714839
chr3L	3719407	3732609
chr3L	3836032	3899266
chr3L	3941035	4090896
chr3L	4093398	4099882
chr3L	4137868	4150787
chr3L	4154347	4158155
chr3L	4161484	4168541
chr3L	4171906	4185834
chr3L	4187155	4193380
chr3L	4224854	4237600
chr3L	4291510	4308545
chr3L	4366952	4373611
chr3L	4385480	4404119
chr3L	4422903	4440792
chr3L	4451979	4519934
chr3L	4521672	4536619
chr3L	4541544	4553078
chr3L	4558415	4576811
chr3L	4640920	4652002
chr3L	4655283	4671348
chr3L	4686057	4723895
chr3L	4725815	4811887
chr3L	4837843	4907956
chr3L	4911878	4962651
chr3L	4979250	4990099
chr3L	4992648	5024256
chr3L	5028140	5043556
chr3L	5045510	5062204
chr3L	5066403	5088284
chr3L	5091056	5097129
chr3L	5104542	5107763
chr3L	5114766	5122057
chr3L	5124632	5130298
chr3L	5227239	5239884
chr3L	5260070	5268231
chr3L	5296704	5311877
chr3L	5317567	5343593
chr3L	5368972	5396454
chr3L	5409678	5420982
chr3L	5429602	5438210
chr3L	5442308	5458072
chr3L	5459571	5466660
chr3L	5478010	5489488
chr3L	5492735	5514720
chr3L	5516809	5547000
chr3L	5567229	5580041
chr3L	5585616	5604477
chr3L	5608733	5639116
chr3L	5650816	5658134
chr3L	5665125	5744368
chr3L	5801615	5921457
chr3L	5921977	5930049
chr3L	5930075	5971745
chr3L	5973529	5977986
chr3L	5990600	6000351
chr3L	6001797	6040416
chr3L	6042721	6055933
chr3L	6076308	6081410
chr3L	6098784	6123864
chr3L	6137182	6164734
chr3L	6220965	6230049
chr3L	6233604	6254522
chr3L	6262192	6277001
chr3L	6277091	6334076
chr3L	6340248	6366893
chr3L	6366990	6401027
chr3L	6404821	6441638
chr3L	6477387	6486190
chr3L	6530219	6538890
chr3L	6542322	6573108
chr3L	6574538	6583321
chr3L	6592321	6689619
chr3L	6713418	6728934
chr3L	6752997	6781171
chr3L	6783147	6852488
chr3L	6852830	6948644
chr3L	6980851	6994719
chr3L	7007561	7057110
chr3L	7059099	7092129
chr3L	7098041	7123292
chr3L	7159348	7168575
chr3L	7170274	7184216
chr3L	7189393	7236636
chr3L	7248894	7264997
chr3L	7267137	7280527
chr3L	7289116	7313365
chr3L	7388475	7433190
chr3L	7435882	7480174
chr3L	7481539	7487983
chr3L	7489869	7509808
chr3L	7517657	7527941
chr3L	7540197	7555760
chr3L	7557677	7575735
chr3L	7577850	7596593
chr3L	7601371	7611833
chr3L	7622601	7627656
chr3L	7629035	7639284
chr3L	7655697	7719947
chr3L	7726759	7733178
chr3L	7744370	7749168
chr3L	7935802	7970459
chr3L	8198119	8241996
chr3L	8248497	8259493
chr3L	8288485	8296676
chr3L	8317686	8337040
chr3L	8360127	8394065
chr3L	8472694	8490931
chr3L	8498343	8507422
chr3L	8604329	8629062
chr3L	8631563	8676442
chr3L	8710164	8748503
chr3L	8750848	8765747
chr3L	8791327	8796671
chr3L	8798570	8828863
chr3L	8891157	8918280
chr3L	8924088	8930280
chr3L	8992831	9055036
chr3L	9078753	9097633
chr3L	9108794	9119281
chr3L	9123252	9126703
chr3L	9138026	9145608
chr3L	9159540	9164751
chr3L	9168799	9183097
chr3L	9189151	9230352
chr3L	9233611	9244091
chr3L	9248680	9256090
chr3L	9266840	9273875
chr3L	9278381	9284315
chr3L	9287900	9298236
chr3L	9306615	9327282
chr3L	9509935	9526536
chr3L	9528159	9571596
chr3L	9575994	9580982
chr3L	9582332	9588614
chr3L	9591957	9613904
chr3L	9758467	9814271
chr3L	9824519	9835475
chr3L	9879955	9886327
chr3L	9914974	9923678
chr3L	9929718	9938447
chr3L	9942248	9965268
chr3L	9978797	9986408
chr3L	9993993	10001002
chr3L	10006011	10027828
chr3L	10032622	10085452
chr3L	10098758	10106345
chr3L	10107356	10122858
chr3L	10125372	10147390
chr3L	10147652	10180920
chr3L	10186856	10220306
chr3L	10225979	10236063
chr3L	10246904	10270371
chr3L	10276761	10284860
chr3L	10289993	10297307
chr3L	10309203	10338490
chr3L	10394311	10401611
chr3L	10405051	10411473
chr3L	10426780	10438690
chr3L	10463890	10471371
chr3L	10483642	10500485
chr3L	10521332	10530816
chr3L	10530887	10537143
chr3L	10551631	10561616
chr3L	10565255	10576182
chr3L	10584706	10589750
chr3L	10705523	10712156
chr3L	10715622	10726838
chr3L	10736576	10737952
chr3L	10755712	10772711
chr3L	10796491	10803206
chr3L	10807440	10814130
chr3L	10822070	10836918
chr3L	10838912	10849627
chr3L	10895747	10901065
chr3L	10903566	10955382
chr3L	10956333	10993868
chr3L	10995719	11036094
chr3L	11104892	11109328
chr3L	11122287	11136547
chr3L	11142886	11166623
chr3L	11174303	11181368
chr3L	11265275	11270287
chr3L	11329758	11332855
chr3L	11388856	11409810
chr3L	11443742	11452105
chr3L	11454481	11474725
chr3L	11480262	11486066
chr3L	11499110	11508211
chr3L	11510352	11521343
chr3L	11572854	11578010
chr3L	11581460	11620866
chr3L	11634678	11645958
chr3L	11649884	11657090
chr3L	11668068	11677054
chr3L	11711932	11720507
chr3L	11723164	11753156
chr3L	11759466	11773467
chr3L	11800657	11816536
chr3L	11841196	11872660
chr3L	11878408	11890834
chr3L	11893535	11912766
chr3L	11914554	11993457
chr3L	12022504	12033859
chr3L	12037274	12067118
chr3L	12127669	12132959
chr3L	12156896	12190504
chr3L	12232440	12243669
chr3L	12281612	12293959
chr3L	12297653	12307631
chr3L	12312975	12335979
chr3L	12339323	12348259
chr3L	12350063	12357126
chr3L	12360114	12368568
chr3L	12379067	12398920
chr3L	12418021	12481906
chr3L	12544405	12731800
chr3L	12776387	12784445
chr3L	12875037	12937283
chr3L	12952129	12957841
chr3L	12964164	12987361
chr3L	12990311	13001987
chr3L	13027614	13032769
chr3L	13056606	13101184
chr3L	13109439	13150372
chr3L	13152767	13179597
chr3L	13181502	13190391
chr3L	13194268	13229365
chr3L	13286277	13358745
chr3L	13366738	13372733
chr3L	13379996	13386059
chr3L	13390302	13410968
chr3L	13412752	13433934
chr3L	13436133	13440771
chr3L	13455679	13476306
chr3L	13510604	13520440
chr3L	13537518	13558218
chr3L	13562054	13580062
chr3L	13586111	13600693
chr3L	13603316	13672681
chr3L	13674191	13709571
chr3L	13715799	13776489
chr3L	13783105	13795800
chr3L	13800441	13836892
chr3L	13840103	13864821
chr3L	13869352	13897389
chr3L	13975446	13986412
chr3L	14077656	14102077
chr3L	14108653	14193295
chr3L	14196424	14208202
chr3L	14236964	14287870
chr3L	14294111	14300475
chr3L	14312116	14324204
chr3L	14349525	14361251
chr3L	14372508	14377792
chr3L	14384172	14391099
chr3L	14461387	14467402
chr3L	14488759	14492544
chr3L	14494951	14501073
chr3L	14507522	14529061
chr3L	14564238	14576080
chr3L	14578672	14622108
chr3L	14672473	14692932
chr3L	14697254	14707093
chr3L	14776473	14781812
chr3L	14826595	14832148
chr3L	14848318	14859440
chr3L	14862832	14909920
chr3L	14918414	14929127
chr3L	14937665	14948425
chr3L	14966984	14970723
chr3L	15001356	15005579
chr3L	15014492	15026582
chr3L	15029895	15044640
chr3L	15179222	15183555
chr3L	15188090	15199957
chr3L	15206404	15223264
chr3L	15228797	15246838
chr3L	15250215	15265548
chr3L	15268029	15277605
chr3L	15295821	15303400
chr3L	15310693	15343705
chr3L	15350052	15362184
chr3L	15366196	15396181
chr3L	15401548	15405870
chr3L	15409414	15415200
chr3L	15417011	15422318
chr3L	15431327	15439102
chr3L	15460843	15488900
chr3L	15642543	15692279
chr3L	15694782	15700483
chr3L	15712764	15723418
chr3L	15725128	15760736
chr3L	15765835	15776480
chr3L	15781752	15799940
chr3L	15842070	15848506
chr3L	15860646	15869198
chr3L	15871073	15892021
chr3L	15903722	15912434
chr3L	15929257	15942064
chr3L	16013515	16020070
chr3L	16026663	16039757
chr3L	16184198	16188910
chr3L	16242389	16257805
chr3L	16260401	16307341
chr3L	16310039	16345541
chr3L	16362261	16372325
chr3L	16393568	16400545
chr3L	16423142	16431905
chr3L	16435404	16437087
chr3L	16446207	16459217
chr3L	16501953	16528442
chr3L	16533500	16542635
chr3L	16546595	16566309
chr3L	16626111	16637285
chr3L	16736503	16763234
chr3L	16770484	16776590
chr3L	16828546	16840621
chr3L	16922850	16955085
chr3L	17049053	17064843
chr3L	17066714	17082153
chr3L	17085054	17179824
chr3L	17184630	17234078
chr3L	17246981	17273459
chr3L	17274793	17308776
chr3L	17310783	17331097
chr3L	17339778	17348969
chr3L	17358117	17421713
chr3L	17448254	17455189
chr3L	17517031	17524537
chr3L	17670193	17680058
chr3L	17682824	17686952
chr3L	17691276	17731404
chr3L	17745298	17751703
chr3L	17768466	17782199
chr3L	17783589	17799760
chr3L	17803076	17812507
chr3L	17812640	17833669
chr3L	17857033	17876519
chr3L	17996650	18000451
chr3L	18002554	18006156
chr3L	18047753	18056755
chr3L	18056986	18063855
chr3L	18129350	18167605
chr3L	18169308	18183945
chr3L	18208096	18220544
chr3L	18230140	18243531
chr3L	18246634	18253536
chr3L	18267216	18273171
chr3L	18277016	18284742
chr3L	18292187	18302454
chr3L	18306571	18311546
chr3L	18319242	18333218
chr3L	18335459	18358444
chr3L	18399237	18414961
chr3L	18441983	18453202
chr3L	18461267	18493383
chr3L	18499122	18509570
chr3L	18513697	18537788
chr3L	18550064	18576321
chr3L	18578240	18593991
chr3L	18596297	18618652
chr3L	18684406	18726859
chr3L	18772460	18781090
chr3L	18916095	18921876
chr3L	18959983	18978422
chr3L	19007237	19045803
chr3L	19050671	19056018
chr3L	19106563	19109829
chr3L	19123255	19141083
chr3L	19142600	19153174
chr3L	19165836	19208112
chr3L	19209429	19233300
chr3L	19243754	19248909
chr3L	19268591	19275146
chr3L	19295568	19334276
chr3L	19341456	19446918
chr3L	19450219	19479925
chr3L	19482398	19493935
chr3L	19495603	19502944
chr3L	19508237	19521713
chr3L	19523760	19543546
chr3L	19557502	19581625
chr3L	19643167	19708522
chr3L	19708559	19713236
chr3L	19739986	19744652
chr3L	19771373	19776073
chr3L	19820344	19826025
chr3L	19848555	19857691
chr3L	19957268	19965994
chr3L	19967561	19991463
chr3L	20037462	20048679
chr3L	20053736	20128630
chr3L	20139322	20156387
chr3L	20195528	20225526
chr3L	20247335	20268618
chr3L	20272235	20297125
chr3L	20321105	20334004
chr3L	20361628	20370004
chr3L	20402434	20410690
chr3L	20416243	20424455
chr3L	20454734	20460131
chr3L	20476263	20484358
chr3L	20541545	20726402
chr3L	20756672	20766272
chr3L	20788919	20800069
chr3L	20821125	20824617
chr3L	20844056	20851605
chr3L	20853392	20987118
chr3L	21075443	21081983
chr3L	21086595	21104483
chr3L	21110360	21120653
chr3L	21136573	21142670
chr3L	21144639	21165602
chr3L	21178538	21190353
chr3L	21207438	21215395
chr3L	21234083	21240624
chr3L	21245566	21256181
chr3L	21291837	21300146
chr3L	21302375	21339126
chr3L	21348557	21363301
chr3L	21365903	21371264
chr3L	21373960	21379233
chr3L	21445593	21497582
chr3L	21554010	21567989
chr3L	21576156	21613109
chr3L	21636330	21678871
chr3L	21683070	21737059
chr3L	21739071	21754114
chr3L	21756589	21768836
chr3L	21772937	21821623
chr3L	21836629	21877283
chr3L	21930820	21938709
chr3L	21952690	22069382
chr3L	22076996	22131485
chr3L	22134032	22260536
chr3L	22270735	22283961
chr3L	22294458	22420965
chr3L	22422424	22461625
chr3L	22464963	22543103
chr3L	22548113	22634718
chr3L	22638851	22675753
chr3L	22677949	22714005
chr3L	22720225	22736205
chr3L	22753168	22775835
chr3L	22803524	22809943
chr3L	22812258	22819650
chr3L	22854605	22863348
chr3L	22886517	22933320
chr3L	22935774	22944301
chr3L	22962667	22970542
chr3L	22972185	22986545
chr3L	22990584	23022043
chr3L	23025331	23064161
chr3L	23065745	23078521
chr3L	23081130	23088732
chr3L	23104187	23124864
chr3L	23148661	23198598
chr3L	23200861	23247633
chr3L	23247711	23277144
chr3L	23280612	23318567
chr3L	23347157	23369872
chr3L	23372207	23488991
chr3L	23496044	23588682
chr3L	23590326	23685578
chr3L	23689339	23739495
chr3L	23749084	23777644
chr3L	23783423	23831116
chr3L	23841005	23860594
chr3L	23862444	23888975
chr3L	23890788	23933864
chr3L	23936033	23984187
chr3L	23985779	24027906
chr3L	24035390	24167278
chr3L	24167598	24213149
chr3L	24218878	24229213
chr3L	24233548	24240214
chr3L	24247663	24278332
chr3L	24281727	24341371
chr3L	24344148	24350244
chr3L	24351926	24369109
chr3L	24372936	24534092
chr3L	24542382	24579018
chr3L	24593095	24763289
chr3L	24769082	24827773
chr3L	24831302	24918825
chr3L	24920844	25008721
chr3L	25012550	25108451
chr3L	25122050	25169029
chr3L	25176976	25186271
chr3L	25187823	25196379
chr3L	25200002	25207205
chr3L	25210467	25252909
chr3L	25255556	25310359
chr3L	25310399	25411524
chr3L	25416050	25474568
chr3L	25474650	25504164
chr3L	25507972	25514407
chr3L	25516232	25565525
chr3L	25567007	25592179
chr3L	25595003	25608423
chr3L	25610423	25623037
chr3L	25624062	25738221
chr3L	25740119	25775610
chr3L	25777778	25799011
chr3L	25803671	25816110
chr3L	25824379	25838941
chr3L	25851504	25870013
chr3L	25878477	25890805
chr3L	25896412	25922570
chr3L	25926393	25964744
chr3L	25968806	25978254
chr3L	25979044	25995544
chr3L	26014982	26078468
chr3L	26083919	26221333
chr3L	26229583	26243777
chr3L	26246038	26259635
chr3L	26265183	26282486
chr3L	26283861	26372767
chr3L	26374329	26377191
chr3L	26377985	26400914
chr3L	26406999	26504099
chr3L	26507029	26524180
chr3L	26527210	26555381
chr3L	26555432	26562681
chr3L	26569474	26648253
chr3L	26651628	26664943
chr3L	26667111	26710073
chr3L	26712517	26784194
chr3L	26785557	26836104
chr3L	26837337	26851637
chr3L	26851690	26882293
chr3L	26936126	26952525
chr3L	27006388	27082311
chr3L	27086626	27134967
chr3L	27157344	27174923
chr3L	27177322	27262975
chr3L	27268718	27279680
chr3L	27298625	27326719
chr3L	27337008	27347080
chr3L	27357475	27383395
chr3L	27388976	27395597
chr3L	27400050	27410939
chr3L	27424040	27498598
chr3L	27498632	27533641
chr3L	27549268	27678933
chr3L	27681984	27699945
chr3L	27699986	27842622
chr3L	27860587	27886428
chr3L	27889690	27967238
chr3L	27980631	27985462
chr3L	27993038	28002284
chr3L	28013883	28110227
chr3R	0	44499
chr3R	50291	86798
chr3R	97641	169029
chr3R	172514	338512
chr3R	340644	347307
chr3R	356522	377368
chr3R	386804	429050
chr3R	432488	451752
chr3R	453250	534503
chr3R	537375	556515
chr3R	590498	610163
chr3R	620479	626364
chr3R	631246	642807
chr3R	649515	671613
chr3R	682963	690979
chr3R	693342	702566
chr3R	721278	728717
chr3R	735025	739692
chr3R	745172	764151
chr3R	765574	772404
chr3R	778386	825437
chr3R	826774	832434
chr3R	835573	846785
chr3R	852768	860821
chr3R	863315	889829
chr3R	894549	904331
chr3R	915814	931848
chr3R	935816	942679
chr3R	943563	946988
chr3R	951207	973299
chr3R	983152	1005837
chr3R	1007854	1018734
chr3R	1024126	1032213
chr3R	1036000	1055182
chr3R	1065369	1094537
chr3R	1107991	1119930
chr3R	1131344	1142542
chr3R	1145909	1153855
chr3R	1155521	1169409
chr3R	1174146	1188008
chr3R	1195615	1202524
chr3R	1221604	1256664
chr3R	1267624	1280773
chr3R	1282556	1296291
chr3R	1300747	1319677
chr3R	1323462	1342737
chr3R	1345624	1391304
chr3R	1391378	1438979
chr3R	1443366	1455261
chr3R	1468980	1481978
chr3R	1485785	1504782
chr3R	1518116	1560737
chr3R	1569634	1576932
chr3R	1586590	1608264
chr3R	1610557	1618572
chr3R	1620788	1632113
chr3R	1633147	1664335
chr3R	1669693	1679384
chr3R	1690456	1704356
chr3R	1708317	1718096
chr3R	1726824	1770022
chr3R	1794521	1816120
chr3R	1818944	1830813
chr3R	1835861	1844687
chr3R	1851619	1862468
chr3R	1865073	1878177
chr3R	1881130	1888011
chr3R	1889488	1896369
chr3R	1905634	1917055
chr3R	1919048	1924806
chr3R	1939485	1945671
chr3R	1948698	1951449
chr3R	1953680	1962248
chr3R	1973040	2012245
chr3R	2017884	2032196
chr3R	2037361	2041347
chr3R	2051217	2063319
chr3R	2068593	2097226
chr3R	2103365	2113868
chr3R	2123057	2129258
chr3R	2133213	2141261
chr3R	2143131	2157619
chr3R	2170709	2198821
chr3R	2200265	2220758
chr3R	2224993	2254600
chr3R	2259894	2336570
chr3R	2339358	2379656
chr3R	2381044	2385917
chr3R	2391883	2413126
chr3R	2421989	2432418
chr3R	2438303	2444192
chr3R	2445833	2474831
chr3R	2476149	2488669
chr3R	2499979	2515609
chr3R	2516632	2519338
chr3R	2522691	2527717
chr3R	2530100	2536014
chr3R	2544879	2549648
chr3R	2559567	2585736
chr3R	2586524	2613002
chr3R	2619276	2627653
chr3R	2629801	2647156
chr3R	2652825	2666372
chr3R	2684584	2697526
chr3R	2699215	2713237
chr3R	2721202	2781523
chr3R	2781525	2816206
chr3R	2816761	2822764
chr3R	2837110	2855950
chr3R	2860651	2878962
chr3R	2880990	2904558
chr3R	2906640	2973867
chr3R	2974894	2981963
chr3R	2984387	3022436
chr3R	3026150	3030886
chr3R	3040430	3059258
chr3R	3076260	3100608
chr3R	3103685	3122547
chr3R	3136536	3147503
chr3R	3148493	3156456
chr3R	3156559	3263202
chr3R	3263515	3267001
chr3R	3270387	3432766
chr3R	3440277	3462557
chr3R	3472938	3477304
chr3R	3488480	3499813
chr3R	3509791	3524645
chr3R	3525744	3562823
chr3R	3568275	3578907
chr3R	3588140	3620002
chr3R	3631080	3734372
chr3R	3756465	3788118
chr3R	3792174	3809579
chr3R	3815339	3821491
chr3R	3827719	3845605
chr3R	3865983	3889665
chr3R	3891026	3938084
chr3R	3944569	3985687
chr3R	3988693	4009643
chr3R	4012124	4027340
chr3R	4029973	4040527
chr3R	4042049	4064261
chr3R	4070868	4074950
chr3R	4087518	4105073
chr3R	4115501	4126674
chr3R	4129962	4134583
chr3R	4141192	4168485
chr3R	4174278	4196278
chr3R	4206120	4211636
chr3R	4244313	4265965
chr3R	4268457	4303546
chr3R	4342946	4349957
chr3R	4351571	4355609
chr3R	4358430	4378064
chr3R	4412752	4418345
chr3R	4454887	4463574
chr3R	4480444	4484906
chr3R	4488395	4513416
chr3R	4525541	4547984
chr3R	4553449	4563646
chr3R	4570831	4574668
chr3R	4588339	4594233
chr3R	4600284	4610431
chr3R	4613184	4617972
chr3R	4622347	4637543
chr3R	4661615	4683344
chr3R	4686417	4692530
chr3R	4694471	4705112
chr3R	4718685	4733692
chr3R	4750553	4757492
chr3R	4759952	4774079
chr3R	4777634	4785527
chr3R	4817853	4906852
chr3R	4953545	4969113
chr3R	4972521	4990626
chr3R	4999453	5008020
chr3R	5019027	5080345
chr3R	5086080	5169852
chr3R	5311811	5349903
chr3R	5375360	5390886
chr3R	5393731	5457998
chr3R	5488158	5501613
chr3R	5507479	5518701
chr3R	5679939	5732906
chr3R	5747076	5753202
chr3R	5757325	5790668
chr3R	5800357	5814461
chr3R	5826741	5852282
chr3R	5861617	6001914
chr3R	6009464	6016009
chr3R	6024440	6158567
chr3R	6167089	6239458
chr3R	6248457	6283490
chr3R	6285562	6341323
chr3R	6415715	6419470
chr3R	6462095	6482297
chr3R	6486894	6524969
chr3R	6526780	6645654
chr3R	6656109	6816907
chr3R	6819681	7060024
chr3R	7135311	7143243
chr3R	7159078	7187718
chr3R	7200344	7438373
chr3R	7440037	7470023
chr3R	7513487	7531097
chr3R	7551422	7563245
chr3R	7570327	7623114
chr3R	7652591	7757958
chr3R	7761822	7785472
chr3R	7797155	7854874
chr3R	7860966	7871636
chr3R	7873618	7890184
chr3R	7924641	7939418
chr3R	7981971	7992903
chr3R	8036607	8106969
chr3R	8130528	8232572
chr3R	8242988	8264563
chr3R	8268157	8286732
chr3R	8293772	8305460
chr3R	8307796	8344673
chr3R	8360936	8517518
chr3R	8523448	8532375
chr3R	8533772	8562671
chr3R	8570526	8573690
chr3R	8577844	8629804
chr3R	8637792	8647513
chr3R	8676049	8701848
chr3R	8707466	8709779
chr3R	8753514	8762503
chr3R	8764064	8800980
chr3R	8878137	8891408
chr3R	8898264	8924655
chr3R	8931690	8938321
chr3R	8950685	8955991
chr3R	8962690	8970338
chr3R	8972316	8979810
chr3R	8994958	9004042
chr3R	9070770	9084481
chr3R	9094317	9113697
chr3R	9121727	9139330
chr3R	9150393	9158870
chr3R	9162629	9180781
chr3R	9192621	9213661
chr3R	9267988	9311210
chr3R	9383063	9401927
chr3R	9457601	9478430
chr3R	9481534	9498810
chr3R	9579059	9631273
chr3R	9642520	9674890
chr3R	9728179	9741150
chr3R	9809977	9838127
chr3R	9845562	9855558
chr3R	9858787	9868794
chr3R	9992872	9998384
chr3R	10059141	10061991
chr3R	10067170	10077690
chr3R	10110809	10120139
chr3R	10162944	10190098
chr3R	10203993	10255232
chr3R	10257417	10260785
chr3R	10304491	10316023
chr3R	10361779	10374251
chr3R	10410766	10697098
chr3R	10706983	10762418
chr3R	10770759	10782350
chr3R	10791205	10800704
chr3R	10805355	10814967
chr3R	10820764	10844874
chr3R	10895633	10915813
chr3R	10917407	10955323
chr3R	10957952	10963258
chr3R	10964905	11046817
chr3R	11049540	11090056
chr3R	11092742	11098510
chr3R	11098633	11107491
chr3R	11111936	11140871
chr3R	11159964	11177883
chr3R	11185468	11197737
chr3R	11253205	11270383
chr3R	11281370	11334911
chr3R	11338378	11407366
chr3R	11413327	11427273
chr3R	11434191	11442127
chr3R	11459818	11559891
chr3R	11572137	11582712
chr3R	11656857	11674024
chr3R	11693451	11736887
chr3R	11794913	11818125
chr3R	11822770	11828012
chr3R	11841145	11856172
chr3R	11866187	11880392
chr3R	11893358	11947994
chr3R	11984411	11990550
chr3R	12000428	12005165
chr3R	12025070	12063747
chr3R	12072427	12103749
chr3R	12106456	12150213
chr3R	12153189	12351032
chr3R	12357073	12366966
chr3R	12381163	12393743
chr3R	12463251	12561529
chr3R	12568910	12623604
chr3R	12630622	12652618
chr3R	12652842	12692001
chr3R	12727219	12737472
chr3R	12744759	12791214
chr3R	12799774	12890738
chr3R	12896767	12917338
chr3R	12928521	12935459
chr3R	12937059	12951551
chr3R	12967024	12975928
chr3R	13029375	13080164
chr3R	13094428	13103520
chr3R	13122027	13248811
chr3R	13278227	13305616
chr3R	13314189	13332523
chr3R	13335927	13355675
chr3R	13385380	13395783
chr3R	13402256	13431784
chr3R	13438360	13453938
chr3R	13455635	13465496
chr3R	13467097	13480599
chr3R	13482947	13501968
chr3R	13509103	13567954
chr3R	13570265	13593098
chr3R	13604842	13620154
chr3R	13627295	13634935
chr3R	13699988	13705991
chr3R	13713790	13758023
chr3R	13765273	13779160
chr3R	13782638	13791987
chr3R	13798165	13818361
chr3R	13838537	13965444
chr3R	13978798	13980882
chr3R	14099145	14123882
chr3R	14137536	14244435
chr3R	14246459	14247826
chr3R	14329800	14352147
chr3R	14372363	14389733
chr3R	14481593	14512056
chr3R	14533614	14544638
chr3R	14576354	14620258
chr3R	14623301	14642699
chr3R	14654349	14660198
chr3R	14812000	14881809
chr3R	14901845	14970973
chr3R	14975109	15007904
chr3R	15013896	15018678
chr3R	15021746	15041467
chr3R	15041529	15045177
chr3R	15045186	15055023
chr3R	15056471	15084077
chr3R	15135200	15140092
chr3R	15153045	15159860
chr3R	15162624	15167299
chr3R	15184228	15190941
chr3R	15251789	15257400
chr3R	15374297	15416094
chr3R	15419063	15435221
chr3R	15438687	15468451
chr3R	15474647	15601847
chr3R	15607026	15658511
chr3R	15688514	15722602
chr3R	15735284	15739955
chr3R	15742481	15768713
chr3R	15773240	15787544
chr3R	15838558	15867526
chr3R	15895109	15899052
chr3R	15907527	15936178
chr3R	15975596	16003852
chr3R	16004066	16041776
chr3R	16065081	16068434
chr3R	16104469	16128916
chr3R	16132452	16143370
chr3R	16161751	16178849
chr3R	16183669	16191935
chr3R	16309390	16333623
chr3R	16354395	16434711
chr3R	16471569	16499534
chr3R	16503233	16643348
chr3R	16647376	16998632
chr3R	17015420	17036479
chr3R	17118492	17148251
chr3R	17150441	17166197
chr3R	17168499	17382065
chr3R	17403376	17414546
chr3R	17421253	17447993
chr3R	17462112	17535324
[truncated: 820 more rows]

## Sheet: Table_S3_fragments_per_cell
cell	total	sample
AAACGGTC_AGCCGTTC_TAACGATT_CCATTGTG	8112	1_day_old
AAACGGTC_CCCTTGGA_GTCCTTCG_GTCACGTC	1076	1_day_old
AAACGGTC_CCTTATGT_ATGTAGAC_TTACGCCG	136	1_day_old
AAACGGTC_CGCCAGAT_TAACGATT_TTACGCCG	2040	1_day_old
AAACGGTC_CGGACTGC_AAGGAATC_AATTCTAA	1690	1_day_old
AAACGGTC_CGGACTGC_AAGGAATC_CCATTGTG	906	1_day_old
AAACGGTC_CGGACTGC_TAACGATT_AATAACGT	470	1_day_old
AAACGGTC_CTTTAACA_GTCCTTCG_AATAACGT	292	1_day_old
AAACGGTC_GATCATTC_AAGGAATC_AATTCTAA	221	1_day_old
AAACGGTC_GATTCCCA_GTCCTTCG_TTACGCCG	1392	1_day_old
AAACGGTC_GCAAATTT_ATGTAGAC_GCGGTTAA	340	1_day_old
AAACGGTC_GGGCTTGG_ATGTAGAC_AATAACGT	1688	1_day_old
AAACGGTC_TAAGTTAC_TAACGATT_TGCGAAGT	376	1_day_old
AAACGGTC_TCCATCAA_TAACGATT_CCATTGTG	323	1_day_old
AAACGGTC_TCCGAGTT_ATGTAGAC_CGGCGACA	263	1_day_old
AAACGGTC_TTCGTGCA_ATGTAGAC_AATTCTAA	1334	1_day_old
AAACGGTC_TTCGTGCA_GTCCTTCG_CGGCGACA	1119	1_day_old
AAACGGTC_TTCGTGCA_GTCCTTCG_GCGGTTAA	1388	1_day_old
AAATACAG_AACATGAT_GTCCTTCG_TTACGCCG	2990	1_day_old
AAATACAG_AACATGAT_TAACGATT_TTACGCCG	4402	1_day_old
AAATACAG_AAGGAGTA_GTCCTTCG_TGCGAAGT	2873	1_day_old
AAATACAG_AATCTACA_GTCCTTCG_GCGGTTAA	1105	1_day_old
AAATACAG_ACATTCGT_ATGTAGAC_TTACGCCG	4513	1_day_old
AAATACAG_ACCGGCCC_TAACGATT_AATTCTAA	570	1_day_old
AAATACAG_AGCCGTTC_AAGGAATC_TTACGCCG	1601	1_day_old
AAATACAG_AGCCGTTC_GTCCTTCG_GCGGTTAA	1908	1_day_old
AAATACAG_AGCCGTTC_TAACGATT_AATAACGT	942	1_day_old
AAATACAG_AGGTTGCC_AAGGAATC_TTACGCCG	1322	1_day_old
AAATACAG_CCACCGTT_AAGGAATC_AATAACGT	1435	1_day_old
AAATACAG_CCCTTGGA_GTCCTTCG_AATAACGT	1817	1_day_old
AAATACAG_CCTTATGT_AAGGAATC_GTCACGTC	1412	1_day_old
AAATACAG_CGATAGGG_AAGGAATC_CGGCGACA	1033	1_day_old
AAATACAG_CGCCAGAT_ATGTAGAC_TGCGAAGT	851	1_day_old
AAATACAG_CGGACTGC_ATGTAGAC_TTACGCCG	3000	1_day_old
AAATACAG_CGTACCAA_TAACGATT_GTCACGTC	1155	1_day_old
AAATACAG_CGTAGACC_ATGTAGAC_GTCACGTC	1585	1_day_old
AAATACAG_CTAGAAGT_TAACGATT_AATAACGT	145	1_day_old
AAATACAG_GAGACGTG_ATGTAGAC_GTCACGTC	2145	1_day_old
AAATACAG_GATCATTC_GTCCTTCG_AATTCTAA	1826	1_day_old
AAATACAG_GCAAATTT_AAGGAATC_GCGGTTAA	2107	1_day_old
AAATACAG_GCAAATTT_AAGGAATC_TGCGAAGT	799	1_day_old
AAATACAG_GCAAATTT_GTCCTTCG_AATTCTAA	3055	1_day_old
AAATACAG_GCCCACGT_AAGGAATC_AATAACGT	307	1_day_old
AAATACAG_GGGCTTGG_GTCCTTCG_AATAACGT	971	1_day_old
AAATACAG_TAACCAAG_ATGTAGAC_CGGCGACA	2303	1_day_old
AAATACAG_TAAGTTAC_GTCCTTCG_AATTCTAA	318	1_day_old
AAATACAG_TACTGACC_TAACGATT_GCGGTTAA	483	1_day_old
AAATACAG_TATCCTCT_AAGGAATC_GTCACGTC	933	1_day_old
AAATACAG_TATTTGCG_GTCCTTCG_TTACGCCG	1872	1_day_old
AAATACAG_TATTTGCG_TAACGATT_CGGCGACA	1009	1_day_old
AAATACAG_TCAAGAGC_AAGGAATC_TGCGAAGT	2551	1_day_old
AAATACAG_TGGGCGGT_AAGGAATC_TTACGCCG	167	1_day_old
AAATACAG_TTGCCTAA_AAGGAATC_TGCGAAGT	893	1_day_old
AACGCCAT_AACATGAT_GTCCTTCG_GTCACGTC	718	1_day_old
AACGCCAT_AAGGAGTA_TAACGATT_TGCGAAGT	161	1_day_old
AACGCCAT_AATCTACA_ATGTAGAC_GCGGTTAA	337	1_day_old
AACGCCAT_ACCGGCCC_TAACGATT_AATTCTAA	2091	1_day_old
AACGCCAT_ACGCGCAG_GTCCTTCG_CCATTGTG	452	1_day_old
AACGCCAT_ACTGCATA_TAACGATT_AATAACGT	519	1_day_old
AACGCCAT_ACTTAGAA_AAGGAATC_GTCACGTC	168	1_day_old
AACGCCAT_AGAGTAGA_GTCCTTCG_TTACGCCG	1280	1_day_old
AACGCCAT_ATGGTCAT_ATGTAGAC_GCGGTTAA	430	1_day_old
AACGCCAT_ATTACCGT_AAGGAATC_TTACGCCG	657	1_day_old
AACGCCAT_ATTGGGTC_TAACGATT_AATTCTAA	955	1_day_old
AACGCCAT_CAGCAACG_GTCCTTCG_GTCACGTC	1577	1_day_old
AACGCCAT_CCAGTTTA_AAGGAATC_TGCGAAGT	529	1_day_old
AACGCCAT_CCAGTTTA_GTCCTTCG_TGCGAAGT	180	1_day_old
AACGCCAT_CCCTTGGA_GTCCTTCG_TTACGCCG	301	1_day_old
AACGCCAT_CCTGCGGG_GTCCTTCG_TGCGAAGT	166	1_day_old
AACGCCAT_CGATAGGG_ATGTAGAC_CGGCGACA	450	1_day_old
AACGCCAT_CGGACTGC_GTCCTTCG_CCATTGTG	2520	1_day_old
AACGCCAT_CGTACCAA_ATGTAGAC_CCATTGTG	772	1_day_old
AACGCCAT_CTAAGCCT_AAGGAATC_GTCACGTC	335	1_day_old
AACGCCAT_CTAAGCCT_GTCCTTCG_TGCGAAGT	626	1_day_old
AACGCCAT_CTTTAACA_AAGGAATC_CCATTGTG	1297	1_day_old
AACGCCAT_CTTTAACA_TAACGATT_TGCGAAGT	3133	1_day_old
AACGCCAT_GAACTCGA_TAACGATT_TGCGAAGT	270	1_day_old
AACGCCAT_GAGACGTG_AAGGAATC_GTCACGTC	590	1_day_old
AACGCCAT_GAGACGTG_TAACGATT_GCGGTTAA	442	1_day_old
AACGCCAT_GATTCCCA_ATGTAGAC_AATAACGT	971	1_day_old
AACGCCAT_GATTCCCA_GTCCTTCG_GTCACGTC	1686	1_day_old
AACGCCAT_GGCACGGA_GTCCTTCG_GCGGTTAA	1288	1_day_old
AACGCCAT_GGTGAAGG_AAGGAATC_TTACGCCG	132	1_day_old
AACGCCAT_GGTTCAAT_GTCCTTCG_TGCGAAGT	890	1_day_old
AACGCCAT_TAAGTTAC_TAACGATT_CCATTGTG	2302	1_day_old
AACGCCAT_TAGATCGC_GTCCTTCG_GCGGTTAA	1788	1_day_old
AACGCCAT_TAGATCGC_TAACGATT_TGCGAAGT	779	1_day_old
AACGCCAT_TGCATACT_TAACGATT_TTACGCCG	238	1_day_old
AACGCCAT_TGGAAATC_AAGGAATC_AATTCTAA	1992	1_day_old
AAGAGGCA_AACATGAT_AAGGAATC_TTACGCCG	811	1_day_old
AAGAGGCA_AATCTACA_ATGTAGAC_TTACGCCG	2003	1_day_old
AAGAGGCA_ACATTCGT_AAGGAATC_GCGGTTAA	400	1_day_old
AAGAGGCA_ACATTCGT_ATGTAGAC_CCATTGTG	1003	1_day_old
AAGAGGCA_ACATTCGT_ATGTAGAC_CGGCGACA	190	1_day_old
AAGAGGCA_ACGATAAC_AAGGAATC_TGCGAAGT	396	1_day_old
AAGAGGCA_ACGCGCAG_GTCCTTCG_CCATTGTG	778	1_day_old
AAGAGGCA_ACTTGTTG_ATGTAGAC_TGCGAAGT	578	1_day_old
AAGAGGCA_AGCCGTTC_TAACGATT_TGCGAAGT	408	1_day_old
AAGAGGCA_AGGTTGCC_ATGTAGAC_CGGCGACA	1235	1_day_old
AAGAGGCA_ATCGAATG_ATGTAGAC_CCATTGTG	774	1_day_old
AAGAGGCA_CCAGTTTA_GTCCTTCG_AATAACGT	185	1_day_old
AAGAGGCA_CCCTTGGA_AAGGAATC_TGCGAAGT	468	1_day_old
AAGAGGCA_CCCTTGGA_GTCCTTCG_TTACGCCG	173	1_day_old
AAGAGGCA_CCCTTGGA_TAACGATT_AATTCTAA	624	1_day_old
AAGAGGCA_CCCTTGGA_TAACGATT_CCATTGTG	469	1_day_old
AAGAGGCA_CGATAGGG_AAGGAATC_AATTCTAA	292	1_day_old
AAGAGGCA_CGATAGGG_ATGTAGAC_CGGCGACA	691	1_day_old
AAGAGGCA_CGGACTGC_AAGGAATC_AATTCTAA	1728	1_day_old
AAGAGGCA_CGTAGACC_TAACGATT_CCATTGTG	219	1_day_old
AAGAGGCA_CTAAGCCT_AAGGAATC_GTCACGTC	126	1_day_old
AAGAGGCA_CTTTAACA_ATGTAGAC_GCGGTTAA	1406	1_day_old
AAGAGGCA_GACGTGGC_GTCCTTCG_CGGCGACA	315	1_day_old
AAGAGGCA_GCATTAAG_ATGTAGAC_GCGGTTAA	1239	1_day_old
AAGAGGCA_GGCACGGA_GTCCTTCG_AATAACGT	300	1_day_old
AAGAGGCA_GGCACGGA_GTCCTTCG_GCGGTTAA	1735	1_day_old
AAGAGGCA_GGGCTTGG_AAGGAATC_AATTCTAA	1760	1_day_old
AAGAGGCA_GGTGAAGG_AAGGAATC_GTCACGTC	1554	1_day_old
AAGAGGCA_GGTGAAGG_AAGGAATC_TTACGCCG	359	1_day_old
AAGAGGCA_GGTTCAAT_AAGGAATC_CCATTGTG	2335	1_day_old
AAGAGGCA_TAGATCGC_ATGTAGAC_AATAACGT	1983	1_day_old
AAGAGGCA_TATTTGCG_GTCCTTCG_TTACGCCG	876	1_day_old
AAGAGGCA_TGATTGTT_ATGTAGAC_AATTCTAA	771	1_day_old
AAGAGGCA_TTAACTTG_ATGTAGAC_GTCACGTC	1360	1_day_old
AAGAGGCA_TTAACTTG_GTCCTTCG_TGCGAAGT	708	1_day_old
AAGAGGCA_TTTCTAGC_TAACGATT_AATTCTAA	513	1_day_old
AATGGTAG_AAGGAGTA_GTCCTTCG_GCGGTTAA	1315	1_day_old
AATGGTAG_ACCGGCCC_AAGGAATC_GCGGTTAA	1096	1_day_old
AATGGTAG_ACCGGCCC_TAACGATT_CCATTGTG	1004	1_day_old
AATGGTAG_ACTGCATA_AAGGAATC_GCGGTTAA	517	1_day_old
AATGGTAG_AGCCGTTC_TAACGATT_CCATTGTG	574	1_day_old
AATGGTAG_CCCTTGGA_ATGTAGAC_GTCACGTC	1323	1_day_old
AATGGTAG_CCTTATGT_TAACGATT_GTCACGTC	541	1_day_old
AATGGTAG_GACGTGGC_TAACGATT_GCGGTTAA	750	1_day_old
AATGGTAG_GAGACGTG_ATGTAGAC_GTCACGTC	1344	1_day_old
AATGGTAG_GGGCTTGG_TAACGATT_CGGCGACA	736	1_day_old
AATGGTAG_GGTGAAGG_AAGGAATC_GCGGTTAA	1133	1_day_old
AATGGTAG_TAACCAAG_AAGGAATC_GTCACGTC	1037	1_day_old
AATGGTAG_TCCATCAA_ATGTAGAC_GTCACGTC	1580	1_day_old
AATGGTAG_TGGAAATC_AAGGAATC_GCGGTTAA	3072	1_day_old
AATGGTAG_TTCGTGCA_TAACGATT_TGCGAAGT	699	1_day_old
AATGGTAG_TTGCCTAA_AAGGAATC_CGGCGACA	1368	1_day_old
AATTCGTT_AACATGAT_AAGGAATC_GCGGTTAA	3024	1_day_old
AATTCGTT_ACATTCGT_AAGGAATC_TGCGAAGT	993	1_day_old
AATTCGTT_ACATTCGT_TAACGATT_TGCGAAGT	490	1_day_old
AATTCGTT_ACCGGCCC_AAGGAATC_AATTCTAA	1140	1_day_old
AATTCGTT_ACCGGCCC_GTCCTTCG_GCGGTTAA	2530	1_day_old
AATTCGTT_ACGCGCAG_TAACGATT_AATAACGT	1363	1_day_old
AATTCGTT_AGAGTAGA_AAGGAATC_CCATTGTG	1665	1_day_old
AATTCGTT_AGCCGTTC_AAGGAATC_CCATTGTG	847	1_day_old
AATTCGTT_AGTCCGAG_GTCCTTCG_GTCACGTC	796	1_day_old
AATTCGTT_ATCCAGGA_AAGGAATC_CGGCGACA	1234	1_day_old
AATTCGTT_ATCCAGGA_TAACGATT_AATAACGT	928	1_day_old
AATTCGTT_ATGGTCAT_TAACGATT_AATTCTAA	388	1_day_old
AATTCGTT_ATTACCGT_TAACGATT_GCGGTTAA	2371	1_day_old
AATTCGTT_ATTACCGT_TAACGATT_GTCACGTC	1228	1_day_old
AATTCGTT_ATTGGGTC_ATGTAGAC_CCATTGTG	1975	1_day_old
AATTCGTT_CCAGTTTA_AAGGAATC_TTACGCCG	2523	1_day_old
AATTCGTT_CCCTTGGA_ATGTAGAC_TTACGCCG	2119	1_day_old
AATTCGTT_CGCCAGAT_GTCCTTCG_AATAACGT	2421	1_day_old
AATTCGTT_CGTACCAA_TAACGATT_CGGCGACA	1088	1_day_old
AATTCGTT_CTAAGCCT_ATGTAGAC_CCATTGTG	2937	1_day_old
AATTCGTT_CTTTAACA_TAACGATT_TGCGAAGT	343	1_day_old
AATTCGTT_GAACTCGA_AAGGAATC_AATTCTAA	2192	1_day_old
AATTCGTT_GAGACGTG_ATGTAGAC_GTCACGTC	2003	1_day_old
AATTCGTT_GATCATTC_TAACGATT_CGGCGACA	579	1_day_old
AATTCGTT_GCAAATTT_AAGGAATC_AATAACGT	3220	1_day_old
AATTCGTT_GCATTAAG_AAGGAATC_TTACGCCG	2411	1_day_old
AATTCGTT_GGGCTTGG_GTCCTTCG_TGCGAAGT	1217	1_day_old
AATTCGTT_GGTGAAGG_AAGGAATC_TTACGCCG	478	1_day_old
AATTCGTT_GGTGAAGG_ATGTAGAC_GCGGTTAA	1560	1_day_old
AATTCGTT_GGTGAAGG_GTCCTTCG_CCATTGTG	884	1_day_old
AATTCGTT_GGTGAAGG_TAACGATT_AATAACGT	1035	1_day_old
AATTCGTT_GTAAGGAG_AAGGAATC_CCATTGTG	5049	1_day_old
AATTCGTT_GTAAGGAG_ATGTAGAC_AATAACGT	572	1_day_old
AATTCGTT_GTCGGACT_TAACGATT_CCATTGTG	1394	1_day_old
AATTCGTT_TAAGTTAC_AAGGAATC_AATTCTAA	2342	1_day_old
AATTCGTT_TAGATCGC_TAACGATT_AATTCTAA	1842	1_day_old
AATTCGTT_TATTTGCG_ATGTAGAC_GTCACGTC	1911	1_day_old
AATTCGTT_TATTTGCG_GTCCTTCG_TTACGCCG	3992	1_day_old
AATTCGTT_TCACATGG_TAACGATT_CGGCGACA	564	1_day_old
AATTCGTT_TCCGAGTT_AAGGAATC_TTACGCCG	983	1_day_old
AATTCGTT_TGATGAAA_AAGGAATC_AATAACGT	2722	1_day_old
AATTCGTT_TGCATACT_AAGGAATC_CGGCGACA	1567	1_day_old
AATTCGTT_TGCATACT_ATGTAGAC_AATAACGT	2790	1_day_old
AATTCGTT_TGCATACT_GTCCTTCG_TTACGCCG	1614	1_day_old
AATTCGTT_TTGCCTAA_GTCCTTCG_GCGGTTAA	2122	1_day_old
ACAAAGTG_AGCCGTTC_GTCCTTCG_GTCACGTC	1405	1_day_old
ACAAAGTG_AGCCGTTC_GTCCTTCG_TTACGCCG	440	1_day_old
ACAAAGTG_AGTCCGAG_AAGGAATC_AATAACGT	1745	1_day_old
ACAAAGTG_CAGCAACG_GTCCTTCG_CCATTGTG	4617	1_day_old
ACAAAGTG_CCAGTTTA_AAGGAATC_AATAACGT	1442	1_day_old
ACAAAGTG_CCAGTTTA_ATGTAGAC_GTCACGTC	1106	1_day_old
ACAAAGTG_CCTTATGT_AAGGAATC_CGGCGACA	1418	1_day_old
ACAAAGTG_CGATAGGG_TAACGATT_AATAACGT	2969	1_day_old
ACAAAGTG_CGCCAGAT_GTCCTTCG_TTACGCCG	923	1_day_old
ACAAAGTG_CGGACTGC_ATGTAGAC_CCATTGTG	1520	1_day_old
ACAAAGTG_CTAGAAGT_TAACGATT_CCATTGTG	1121	1_day_old
ACAAAGTG_CTCTCTAT_GTCCTTCG_CGGCGACA	988	1_day_old
ACAAAGTG_GAGACGTG_TAACGATT_CCATTGTG	1138	1_day_old
ACAAAGTG_GAGACGTG_TAACGATT_GCGGTTAA	619	1_day_old
ACAAAGTG_GGTGAAGG_AAGGAATC_TTACGCCG	199	1_day_old
ACAAAGTG_TAACCAAG_GTCCTTCG_TGCGAAGT	703	1_day_old
ACAAAGTG_TAACCAAG_TAACGATT_GCGGTTAA	1000	1_day_old
ACAAAGTG_TAAGTTAC_AAGGAATC_AATTCTAA	1743	1_day_old
ACAAAGTG_TCAAGAGC_GTCCTTCG_TTACGCCG	1817	1_day_old
ACAAAGTG_TGGGCGGT_ATGTAGAC_GTCACGTC	962	1_day_old
ACAAAGTG_TGTTCCTG_TAACGATT_AATAACGT	1366	1_day_old
ACAAAGTG_TTAACTTG_AAGGAATC_CCATTGTG	1813	1_day_old
ACAAAGTG_TTCGTGCA_ATGTAGAC_TGCGAAGT	525	1_day_old
ACCGGCTA_AAGGAGTA_AAGGAATC_AATTCTAA	1716	1_day_old
ACCGGCTA_AAGGAGTA_GTCCTTCG_TTACGCCG	1863	1_day_old
ACCGGCTA_AATCTACA_GTCCTTCG_GCGGTTAA	151	1_day_old
ACCGGCTA_ACCGGCCC_GTCCTTCG_TTACGCCG	2439	1_day_old
ACCGGCTA_AGAGATCT_TAACGATT_AATAACGT	133	1_day_old
ACCGGCTA_AGCCGTTC_GTCCTTCG_CGGCGACA	1869	1_day_old
ACCGGCTA_AGTCCGAG_TAACGATT_AATAACGT	1442	1_day_old
ACCGGCTA_CGCCAGAT_TAACGATT_GCGGTTAA	1536	1_day_old
ACCGGCTA_CGTACCAA_TAACGATT_CCATTGTG	892	1_day_old
ACCGGCTA_CTTTAACA_AAGGAATC_AATAACGT	2728	1_day_old
ACCGGCTA_GCAAATTT_TAACGATT_CCATTGTG	859	1_day_old
ACCGGCTA_GCATTAAG_ATGTAGAC_GTCACGTC	1851	1_day_old
ACCGGCTA_TACTGACC_TAACGATT_GCGGTTAA	729	1_day_old
ACCGGCTA_TCCGAGTT_AAGGAATC_TGCGAAGT	1154	1_day_old
ACCGGCTA_TGATGAAA_GTCCTTCG_TTACGCCG	1525	1_day_old
ACCGGCTA_TGATTGTT_TAACGATT_GCGGTTAA	1308	1_day_old
ACCGGCTA_TTCGTGCA_GTCCTTCG_AATAACGT	4317	1_day_old
ACCGGCTA_TTTCTAGC_TAACGATT_AATTCTAA	514	1_day_old
AGGCAGAA_ACGCGCAG_GTCCTTCG_CCATTGTG	853	1_day_old
AGGCAGAA_ACTTGTTG_TAACGATT_TGCGAAGT	391	1_day_old
AGGCAGAA_AGGTTGCC_TAACGATT_CCATTGTG	588	1_day_old
AGGCAGAA_ATCGAATG_TAACGATT_GCGGTTAA	509	1_day_old
AGGCAGAA_ATGGTCAT_ATGTAGAC_AATAACGT	280	1_day_old
AGGCAGAA_ATTACCGT_AAGGAATC_CCATTGTG	1401	1_day_old
AGGCAGAA_ATTGGGTC_ATGTAGAC_AATAACGT	1913	1_day_old
AGGCAGAA_ATTGGGTC_TAACGATT_GTCACGTC	994	1_day_old
AGGCAGAA_CCAGTTTA_AAGGAATC_GCGGTTAA	935	1_day_old
AGGCAGAA_CCAGTTTA_AAGGAATC_TTACGCCG	863	1_day_old
AGGCAGAA_CCCTTGGA_GTCCTTCG_TTACGCCG	111	1_day_old
AGGCAGAA_CCTTATGT_GTCCTTCG_TTACGCCG	811	1_day_old
AGGCAGAA_CGATAGGG_AAGGAATC_AATTCTAA	276	1_day_old
AGGCAGAA_CGATAGGG_ATGTAGAC_CGGCGACA	662	1_day_old
AGGCAGAA_CGCCAGAT_TAACGATT_CCATTGTG	267	1_day_old
AGGCAGAA_CGGACTGC_AAGGAATC_TTACGCCG	599	1_day_old
AGGCAGAA_CGGACTGC_ATGTAGAC_GTCACGTC	251	1_day_old
AGGCAGAA_CGTACCAA_GTCCTTCG_AATTCTAA	1320	1_day_old
AGGCAGAA_CGTAGACC_AAGGAATC_CCATTGTG	1736	1_day_old
AGGCAGAA_CTAAGCCT_GTCCTTCG_AATTCTAA	3965	1_day_old
AGGCAGAA_GAACTCGA_AAGGAATC_GCGGTTAA	998	1_day_old
AGGCAGAA_GACGTGGC_AAGGAATC_GCGGTTAA	1646	1_day_old
AGGCAGAA_GATTCCCA_ATGTAGAC_GTCACGTC	197	1_day_old
AGGCAGAA_GCAAATTT_AAGGAATC_CCATTGTG	874	1_day_old
AGGCAGAA_GCAAATTT_TAACGATT_AATTCTAA	1282	1_day_old
AGGCAGAA_GCAGCCTC_GTCCTTCG_AATTCTAA	796	1_day_old
AGGCAGAA_GCATTAAG_TAACGATT_CGGCGACA	245	1_day_old
AGGCAGAA_GGCACGGA_ATGTAGAC_AATTCTAA	106	1_day_old
AGGCAGAA_GGTGAAGG_AAGGAATC_TTACGCCG	192	1_day_old
AGGCAGAA_GTAAGGAG_ATGTAGAC_AATTCTAA	267	1_day_old
AGGCAGAA_GTCGGACT_AAGGAATC_CGGCGACA	1301	1_day_old
AGGCAGAA_GTCGGACT_ATGTAGAC_GTCACGTC	981	1_day_old
AGGCAGAA_TACTGACC_AAGGAATC_AATTCTAA	1463	1_day_old
AGGCAGAA_TACTGACC_GTCCTTCG_TGCGAAGT	3042	1_day_old
AGGCAGAA_TACTGACC_TAACGATT_CGGCGACA	235	1_day_old
AGGCAGAA_TCTGGCGA_AAGGAATC_CGGCGACA	291	1_day_old
AGGCAGAA_TGATTGTT_AAGGAATC_GCGGTTAA	2193	1_day_old
AGGCAGAA_TGTTCCTG_ATGTAGAC_GTCACGTC	408	1_day_old
AGGCAGAA_TTGCCTAA_ATGTAGAC_GTCACGTC	1055	1_day_old
AGGTTGGG_AACATGAT_AAGGAATC_AATTCTAA	687	1_day_old
AGGTTGGG_AAGGAGTA_GTCCTTCG_CCATTGTG	426	1_day_old
AGGTTGGG_ACATTCGT_ATGTAGAC_AATAACGT	401	1_day_old
AGGTTGGG_ACGATAAC_TAACGATT_TGCGAAGT	217	1_day_old
AGGTTGGG_ACTTAGAA_TAACGATT_AATTCTAA	867	1_day_old
AGGTTGGG_AGAGTAGA_GTCCTTCG_CGGCGACA	392	1_day_old
AGGTTGGG_AGAGTAGA_TAACGATT_TTACGCCG	558	1_day_old
AGGTTGGG_AGGTTGCC_AAGGAATC_AATAACGT	395	1_day_old
AGGTTGGG_ATCGAATG_ATGTAGAC_CGGCGACA	1569	1_day_old
AGGTTGGG_ATCGAATG_TAACGATT_CGGCGACA	606	1_day_old
AGGTTGGG_ATGGTCAT_AAGGAATC_AATAACGT	668	1_day_old
AGGTTGGG_CCCTTGGA_TAACGATT_CCATTGTG	894	1_day_old
AGGTTGGG_CCTGCGGG_TAACGATT_TGCGAAGT	142	1_day_old
AGGTTGGG_CGATAGGG_AAGGAATC_TTACGCCG	1718	1_day_old
AGGTTGGG_CGGACTGC_GTCCTTCG_TGCGAAGT	737	1_day_old
AGGTTGGG_CTAAGCCT_ATGTAGAC_GTCACGTC	1747	1_day_old
AGGTTGGG_CTAGAAGT_GTCCTTCG_TGCGAAGT	585	1_day_old
AGGTTGGG_GAACTCGA_GTCCTTCG_AATAACGT	2404	1_day_old
AGGTTGGG_GAGACGTG_TAACGATT_TGCGAAGT	373	1_day_old
AGGTTGGG_GCATTAAG_GTCCTTCG_GCGGTTAA	1588	1_day_old
AGGTTGGG_GGGCTTGG_TAACGATT_AATTCTAA	413	1_day_old
AGGTTGGG_GGTTCAAT_AAGGAATC_TTACGCCG	3268	1_day_old
AGGTTGGG_GTAAGGAG_AAGGAATC_GTCACGTC	2474	1_day_old
AGGTTGGG_GTAAGGAG_AAGGAATC_TTACGCCG	288	1_day_old
AGGTTGGG_GTAAGGAG_TAACGATT_TTACGCCG	1936	1_day_old
AGGTTGGG_TAAGTTAC_AAGGAATC_CCATTGTG	1124	1_day_old
AGGTTGGG_TAGATCGC_AAGGAATC_GTCACGTC	2212	1_day_old
AGGTTGGG_TAGATCGC_TAACGATT_AATTCTAA	1136	1_day_old
AGGTTGGG_TCAAGAGC_GTCCTTCG_AATTCTAA	2388	1_day_old
AGGTTGGG_TCCATCAA_AAGGAATC_TGCGAAGT	728	1_day_old
AGGTTGGG_TGCATACT_TAACGATT_CCATTGTG	579	1_day_old
AGGTTGGG_TGGAAATC_TAACGATT_GCGGTTAA	478	1_day_old
AGGTTGGG_TTTCTAGC_ATGTAGAC_GCGGTTAA	199	1_day_old
AGTAGATT_AACATGAT_GTCCTTCG_TTACGCCG	2825	1_day_old
AGTAGATT_AAGGAGTA_ATGTAGAC_TGCGAAGT	3258	1_day_old
AGTAGATT_AATCTACA_TAACGATT_TGCGAAGT	385	1_day_old
AGTAGATT_ACATTCGT_ATGTAGAC_CCATTGTG	570	1_day_old
AGTAGATT_ACGATAAC_GTCCTTCG_AATTCTAA	685	1_day_old
AGTAGATT_ACTGCATA_TAACGATT_AATAACGT	1274	1_day_old
AGTAGATT_AGGTTGCC_TAACGATT_AATAACGT	947	1_day_old
AGTAGATT_AGTCCGAG_TAACGATT_CCATTGTG	856	1_day_old
AGTAGATT_CCTTATGT_GTCCTTCG_CGGCGACA	1182	1_day_old
AGTAGATT_CGGACTGC_GTCCTTCG_GCGGTTAA	925	1_day_old
AGTAGATT_CGTACCAA_TAACGATT_CGGCGACA	2849	1_day_old
AGTAGATT_CGTAGACC_AAGGAATC_TTACGCCG	379	1_day_old
AGTAGATT_CTAAGCCT_AAGGAATC_AATTCTAA	1796	1_day_old
AGTAGATT_CTAAGCCT_AAGGAATC_GCGGTTAA	1363	1_day_old
AGTAGATT_GAACTCGA_ATGTAGAC_GCGGTTAA	927	1_day_old
AGTAGATT_GATCATTC_TAACGATT_CGGCGACA	882	1_day_old
AGTAGATT_GCAGCCTC_AAGGAATC_CGGCGACA	974	1_day_old
AGTAGATT_GCAGCCTC_TAACGATT_GCGGTTAA	871	1_day_old
AGTAGATT_GGCACGGA_GTCCTTCG_TGCGAAGT	1157	1_day_old
AGTAGATT_GGTGAAGG_AAGGAATC_GCGGTTAA	2053	1_day_old
AGTAGATT_GGTGAAGG_TAACGATT_CGGCGACA	2253	1_day_old
AGTAGATT_TAGATCGC_AAGGAATC_TGCGAAGT	832	1_day_old
AGTAGATT_TCCGAGTT_GTCCTTCG_TTACGCCG	2413	1_day_old
AGTAGATT_TGATGAAA_AAGGAATC_AATTCTAA	4036	1_day_old
AGTAGATT_TGATGAAA_ATGTAGAC_CGGCGACA	1784	1_day_old
AGTAGATT_TGCATACT_TAACGATT_AATTCTAA	952	1_day_old
AGTAGATT_TGGGCGGT_AAGGAATC_AATTCTAA	2017	1_day_old
AGTAGATT_TGTTCCTG_AAGGAATC_TGCGAAGT	891	1_day_old
AGTAGATT_TTAACTTG_AAGGAATC_GCGGTTAA	942	1_day_old
AGTAGATT_TTCGTGCA_AAGGAATC_GCGGTTAA	1440	1_day_old
AGTAGATT_TTGCCTAA_TAACGATT_CCATTGTG	808	1_day_old
ATAAGTTA_AATCTACA_GTCCTTCG_CCATTGTG	804	1_day_old
ATAAGTTA_ACTGCATA_TAACGATT_AATTCTAA	853	1_day_old
ATAAGTTA_ACTTGTTG_ATGTAGAC_AATAACGT	1814	1_day_old
ATAAGTTA_ACTTGTTG_GTCCTTCG_CGGCGACA	1147	1_day_old
ATAAGTTA_AGAGTAGA_GTCCTTCG_CCATTGTG	296	1_day_old
ATAAGTTA_AGCCGTTC_TAACGATT_AATTCTAA	905	1_day_old
ATAAGTTA_ATCCAGGA_ATGTAGAC_GTCACGTC	2860	1_day_old
ATAAGTTA_ATTACCGT_AAGGAATC_CCATTGTG	1217	1_day_old
ATAAGTTA_ATTACCGT_ATGTAGAC_CGGCGACA	3143	1_day_old
ATAAGTTA_CAGCAACG_AAGGAATC_TGCGAAGT	849	1_day_old
ATAAGTTA_CCTGCGGG_TAACGATT_AATTCTAA	406	1_day_old
ATAAGTTA_CCTTATGT_TAACGATT_CGGCGACA	410	1_day_old
ATAAGTTA_CGCCAGAT_ATGTAGAC_GTCACGTC	611	1_day_old
ATAAGTTA_CGTACCAA_TAACGATT_AATTCTAA	232	1_day_old
ATAAGTTA_CTAGAAGT_TAACGATT_TTACGCCG	758	1_day_old
ATAAGTTA_GAACTCGA_TAACGATT_GCGGTTAA	968	1_day_old
ATAAGTTA_GACGTGGC_ATGTAGAC_GTCACGTC	1945	1_day_old
ATAAGTTA_GAGACGTG_ATGTAGAC_AATAACGT	1541	1_day_old
ATAAGTTA_GATCATTC_GTCCTTCG_CCATTGTG	1582	1_day_old
ATAAGTTA_GATCATTC_TAACGATT_CCATTGTG	3777	1_day_old
ATAAGTTA_GCATTAAG_TAACGATT_TGCGAAGT	849	1_day_old
ATAAGTTA_GTGTATCG_TAACGATT_AATTCTAA	476	1_day_old
ATAAGTTA_TAACCAAG_TAACGATT_CCATTGTG	1656	1_day_old
ATAAGTTA_TAAGTTAC_GTCCTTCG_AATTCTAA	2183	1_day_old
ATAAGTTA_TACTGACC_ATGTAGAC_CCATTGTG	502	1_day_old
ATAAGTTA_TAGATCGC_AAGGAATC_GCGGTTAA	2127	1_day_old
ATAAGTTA_TGCATACT_AAGGAATC_TGCGAAGT	731	1_day_old
ATAAGTTA_TGGAAATC_ATGTAGAC_AATAACGT	3005	1_day_old
ATAAGTTA_TGGGCGGT_GTCCTTCG_AATAACGT	1541	1_day_old
ATAAGTTA_TTCGTGCA_ATGTAGAC_AATTCTAA	1061	1_day_old
ATCACTCG_ACCGGCCC_GTCCTTCG_CGGCGACA	1894	1_day_old
ATCACTCG_ACGATAAC_TAACGATT_GCGGTTAA	667	1_day_old
ATCACTCG_ACTTGTTG_AAGGAATC_GCGGTTAA	732	1_day_old
ATCACTCG_ACTTGTTG_TAACGATT_AATAACGT	1473	1_day_old
ATCACTCG_ACTTGTTG_TAACGATT_GCGGTTAA	623	1_day_old
ATCACTCG_ATGGTCAT_TAACGATT_TTACGCCG	403	1_day_old
ATCACTCG_ATTACCGT_GTCCTTCG_CGGCGACA	1866	1_day_old
ATCACTCG_CCTGCGGG_GTCCTTCG_AATAACGT	547	1_day_old
ATCACTCG_CCTGCGGG_TAACGATT_TTACGCCG	503	1_day_old
ATCACTCG_CGCCAGAT_AAGGAATC_CCATTGTG	600	1_day_old
ATCACTCG_CTAAGCCT_TAACGATT_GCGGTTAA	225	1_day_old
ATCACTCG_CTAGAAGT_AAGGAATC_AATTCTAA	1285	1_day_old
ATCACTCG_CTAGAAGT_TAACGATT_TTACGCCG	302	1_day_old
ATCACTCG_CTTTAACA_TAACGATT_GTCACGTC	1432	1_day_old
ATCACTCG_GCATTAAG_AAGGAATC_TGCGAAGT	656	1_day_old
ATCACTCG_GGTTCAAT_AAGGAATC_GCGGTTAA	479	1_day_old
ATCACTCG_GTCGGACT_GTCCTTCG_TTACGCCG	1981	1_day_old
ATCACTCG_GTGTATCG_ATGTAGAC_TTACGCCG	340	1_day_old
ATCACTCG_GTGTATCG_TAACGATT_TTACGCCG	349	1_day_old
ATCACTCG_TAACCAAG_AAGGAATC_CCATTGTG	4474	1_day_old
ATCACTCG_TATTTGCG_AAGGAATC_AATTCTAA	1464	1_day_old
ATCACTCG_TCAAGAGC_TAACGATT_AATTCTAA	1224	1_day_old
ATCACTCG_TCCGAGTT_GTCCTTCG_CGGCGACA	849	1_day_old
ATCACTCG_TGATGAAA_TAACGATT_TTACGCCG	126	1_day_old
ATCACTCG_TGCATACT_TAACGATT_CGGCGACA	713	1_day_old
ATCACTCG_TTAACTTG_ATGTAGAC_AATAACGT	1381	1_day_old
ATCACTCG_TTAACTTG_GTCCTTCG_AATTCTAA	1228	1_day_old
ATGATGAT_AACATGAT_GTCCTTCG_TTACGCCG	841	1_day_old
ATGATGAT_ACATTCGT_ATGTAGAC_GTCACGTC	366	1_day_old
ATGATGAT_ACATTCGT_TAACGATT_AATTCTAA	106	1_day_old
ATGATGAT_ACGCGCAG_AAGGAATC_GCGGTTAA	441	1_day_old
ATGATGAT_ACTGCATA_TAACGATT_GTCACGTC	1950	1_day_old
ATGATGAT_ACTTAGAA_AAGGAATC_TGCGAAGT	1478	1_day_old
ATGATGAT_ACTTAGAA_TAACGATT_GTCACGTC	1002	1_day_old
ATGATGAT_AGAGATCT_AAGGAATC_AATAACGT	153	1_day_old
ATGATGAT_AGTCCGAG_AAGGAATC_AATAACGT	334	1_day_old
ATGATGAT_ATCCAGGA_AAGGAATC_AATAACGT	155	1_day_old
ATGATGAT_ATTACCGT_AAGGAATC_GCGGTTAA	2636	1_day_old
ATGATGAT_CTAAGCCT_GTCCTTCG_TTACGCCG	179	1_day_old
ATGATGAT_CTCTCTAT_ATGTAGAC_CCATTGTG	343	1_day_old
ATGATGAT_GAACTCGA_TAACGATT_CGGCGACA	426	1_day_old
ATGATGAT_GAGACGTG_GTCCTTCG_AATAACGT	153	1_day_old
ATGATGAT_GCATTAAG_TAACGATT_CGGCGACA	453	1_day_old
ATGATGAT_GGCACGGA_GTCCTTCG_GCGGTTAA	1822	1_day_old
ATGATGAT_GGCACGGA_TAACGATT_AATTCTAA	6191	1_day_old
ATGATGAT_GGCACGGA_TAACGATT_GCGGTTAA	3038	1_day_old
ATGATGAT_GGTGAAGG_AAGGAATC_GCGGTTAA	135	1_day_old
ATGATGAT_GTCGGACT_AAGGAATC_GCGGTTAA	166	1_day_old
ATGATGAT_GTCGGACT_AAGGAATC_TTACGCCG	251	1_day_old
ATGATGAT_GTGTATCG_AAGGAATC_TTACGCCG	766	1_day_old
ATGATGAT_TAACCAAG_ATGTAGAC_AATTCTAA	425	1_day_old
ATGATGAT_TATCCTCT_GTCCTTCG_TGCGAAGT	851	1_day_old
ATGATGAT_TCTGGCGA_AAGGAATC_TGCGAAGT	112	1_day_old
ATGATGAT_TGGAAATC_AAGGAATC_GTCACGTC	2092	1_day_old
ATGATGAT_TTTCTAGC_ATGTAGAC_AATAACGT	1770	1_day_old
ATGATGAT_TTTCTAGC_ATGTAGAC_GTCACGTC	2270	1_day_old
ATGGGAAC_AACATGAT_GTCCTTCG_TTACGCCG	2331	1_day_old
ATGGGAAC_AATCTACA_GTCCTTCG_CGGCGACA	1649	1_day_old
ATGGGAAC_ACATTCGT_GTCCTTCG_TGCGAAGT	939	1_day_old
ATGGGAAC_ACCGGCCC_TAACGATT_GCGGTTAA	323	1_day_old
ATGGGAAC_ACGCGCAG_GTCCTTCG_AATAACGT	2084	1_day_old
ATGGGAAC_AGAGTAGA_AAGGAATC_TTACGCCG	873	1_day_old
ATGGGAAC_AGGTTGCC_TAACGATT_CCATTGTG	1034	1_day_old
ATGGGAAC_ATCCAGGA_AAGGAATC_GTCACGTC	968	1_day_old
ATGGGAAC_ATCGAATG_AAGGAATC_AATTCTAA	692	1_day_old
ATGGGAAC_ATCGAATG_GTCCTTCG_AATAACGT	3970	1_day_old
ATGGGAAC_ATTACCGT_AAGGAATC_CGGCGACA	2069	1_day_old
ATGGGAAC_CCAGTTTA_AAGGAATC_AATTCTAA	2835	1_day_old
ATGGGAAC_CCAGTTTA_ATGTAGAC_CGGCGACA	391	1_day_old
ATGGGAAC_CGATAGGG_GTCCTTCG_CGGCGACA	255	1_day_old
ATGGGAAC_CGGACTGC_GTCCTTCG_AATAACGT	2189	1_day_old
ATGGGAAC_CTAAGCCT_GTCCTTCG_CGGCGACA	1420	1_day_old
ATGGGAAC_CTAAGCCT_TAACGATT_GTCACGTC	683	1_day_old
ATGGGAAC_CTCTCTAT_AAGGAATC_AATAACGT	3415	1_day_old
ATGGGAAC_CTCTCTAT_TAACGATT_AATAACGT	1420	1_day_old
ATGGGAAC_GAGACGTG_AAGGAATC_GCGGTTAA	1457	1_day_old
ATGGGAAC_GATCATTC_AAGGAATC_CGGCGACA	2222	1_day_old
ATGGGAAC_GTGTATCG_AAGGAATC_AATTCTAA	1166	1_day_old
ATGGGAAC_GTGTATCG_AAGGAATC_GTCACGTC	1532	1_day_old
ATGGGAAC_TCACATGG_GTCCTTCG_GCGGTTAA	914	1_day_old
ATGGGAAC_TGATGAAA_GTCCTTCG_CGGCGACA	1047	1_day_old
ATGGGAAC_TGATTGTT_AAGGAATC_CGGCGACA	2073	1_day_old
ATGGGAAC_TGGAAATC_AAGGAATC_TTACGCCG	1353	1_day_old
ATGGGAAC_TTGCCTAA_AAGGAATC_TGCGAAGT	1205	1_day_old
ATGGGAAC_TTGCCTAA_TAACGATT_AATAACGT	1909	1_day_old
ATTGCCGG_ACGATAAC_ATGTAGAC_AATAACGT	329	1_day_old
ATTGCCGG_AGCCGTTC_GTCCTTCG_GTCACGTC	1619	1_day_old
ATTGCCGG_ATTACCGT_GTCCTTCG_TTACGCCG	933	1_day_old
ATTGCCGG_ATTGGGTC_TAACGATT_AATAACGT	1042	1_day_old
ATTGCCGG_CAGCAACG_AAGGAATC_CGGCGACA	1111	1_day_old
ATTGCCGG_CAGCAACG_TAACGATT_GCGGTTAA	477	1_day_old
ATTGCCGG_CCTGCGGG_AAGGAATC_AATTCTAA	1544	1_day_old
ATTGCCGG_CCTGCGGG_AAGGAATC_CCATTGTG	994	1_day_old
ATTGCCGG_CGGACTGC_TAACGATT_GTCACGTC	787	1_day_old
ATTGCCGG_CTTTAACA_AAGGAATC_AATAACGT	3393	1_day_old
ATTGCCGG_CTTTAACA_TAACGATT_AATTCTAA	681	1_day_old
ATTGCCGG_GGGCTTGG_AAGGAATC_TTACGCCG	812	1_day_old
ATTGCCGG_TAAGTTAC_GTCCTTCG_TTACGCCG	863	1_day_old
ATTGCCGG_TCCATCAA_AAGGAATC_GTCACGTC	1821	1_day_old
ATTGCCGG_TGATGAAA_AAGGAATC_TTACGCCG	133	1_day_old
ATTGCCGG_TGGAAATC_GTCCTTCG_GTCACGTC	1034	1_day_old
ATTGCCGG_TGTTCCTG_GTCCTTCG_AATTCTAA	2657	1_day_old
ATTGCCGG_TTAACTTG_AAGGAATC_GTCACGTC	2140	1_day_old
ATTGCCGG_TTAACTTG_ATGTAGAC_AATTCTAA	1634	1_day_old
ATTGCCGG_TTAACTTG_TAACGATT_AATTCTAA	7038	1_day_old
CAAGAATT_AATCTACA_AAGGAATC_CCATTGTG	1357	1_day_old
CAAGAATT_AATCTACA_ATGTAGAC_CCATTGTG	371	1_day_old
CAAGAATT_ACGCGCAG_TAACGATT_CCATTGTG	1455	1_day_old
CAAGAATT_ACTTAGAA_ATGTAGAC_CCATTGTG	2174	1_day_old
CAAGAATT_AGAGTAGA_AAGGAATC_CCATTGTG	101	1_day_old
CAAGAATT_AGAGTAGA_AAGGAATC_GTCACGTC	1249	1_day_old
CAAGAATT_AGCCGTTC_AAGGAATC_CCATTGTG	308	1_day_old
CAAGAATT_AGCCGTTC_GTCCTTCG_GCGGTTAA	114	1_day_old
CAAGAATT_AGCCGTTC_TAACGATT_GTCACGTC	852	1_day_old
CAAGAATT_AGTCCGAG_AAGGAATC_CCATTGTG	315	1_day_old
CAAGAATT_ATCCAGGA_AAGGAATC_CCATTGTG	413	1_day_old
CAAGAATT_ATCCAGGA_ATGTAGAC_CCATTGTG	103	1_day_old
CAAGAATT_ATCCAGGA_GTCCTTCG_CGGCGACA	1660	1_day_old
CAAGAATT_CAGCAACG_AAGGAATC_CCATTGTG	142	1_day_old
CAAGAATT_CCTGCGGG_AAGGAATC_CCATTGTG	209	1_day_old
CAAGAATT_CGATAGGG_AAGGAATC_CCATTGTG	144	1_day_old
CAAGAATT_CGCCAGAT_AAGGAATC_TGCGAAGT	526	1_day_old
CAAGAATT_CTAAGCCT_AAGGAATC_AATTCTAA	817	1_day_old
CAAGAATT_GAACTCGA_AAGGAATC_GCGGTTAA	890	1_day_old
CAAGAATT_GAGACGTG_GTCCTTCG_GCGGTTAA	985	1_day_old
CAAGAATT_GATCATTC_ATGTAGAC_AATAACGT	1910	1_day_old
CAAGAATT_GATCATTC_ATGTAGAC_AATTCTAA	795	1_day_old
CAAGAATT_GCAGCCTC_AAGGAATC_CCATTGTG	249	1_day_old
CAAGAATT_GGGCTTGG_AAGGAATC_TGCGAAGT	1183	1_day_old
CAAGAATT_GGTGAAGG_AAGGAATC_AATTCTAA	1539	1_day_old
CAAGAATT_GGTTCAAT_AAGGAATC_CCATTGTG	121	1_day_old
CAAGAATT_GGTTCAAT_ATGTAGAC_GCGGTTAA	1193	1_day_old
CAAGAATT_GTCGGACT_AAGGAATC_CCATTGTG	123	1_day_old
CAAGAATT_GTGTATCG_AAGGAATC_CCATTGTG	173	1_day_old
CAAGAATT_GTGTATCG_GTCCTTCG_AATAACGT	1151	1_day_old
CAAGAATT_TAACCAAG_GTCCTTCG_AATTCTAA	1053	1_day_old
CAAGAATT_TACTGACC_AAGGAATC_CCATTGTG	236	1_day_old
CAAGAATT_TCCGAGTT_AAGGAATC_CCATTGTG	152	1_day_old
CAAGAATT_TCTGGCGA_TAACGATT_GCGGTTAA	1171	1_day_old
CAAGAATT_TGATGAAA_TAACGATT_TGCGAAGT	596	1_day_old
CAAGAATT_TGCATACT_AAGGAATC_CCATTGTG	228	1_day_old
CAAGAATT_TGGAAATC_TAACGATT_CCATTGTG	935	1_day_old
CAAGAATT_TGGAAATC_TAACGATT_GTCACGTC	686	1_day_old
CAAGAATT_TGGGCGGT_ATGTAGAC_AATAACGT	960	1_day_old
CAAGAATT_TGTTCCTG_AAGGAATC_CCATTGTG	222	1_day_old
CAAGAATT_TTCGTGCA_ATGTAGAC_AATAACGT	1174	1_day_old
CAATCTTA_AACATGAT_ATGTAGAC_AATAACGT	105	1_day_old
CAATCTTA_AACATGAT_TAACGATT_AATTCTAA	616	1_day_old
CAATCTTA_ACCGGCCC_GTCCTTCG_AATAACGT	2662	1_day_old
CAATCTTA_ACGATAAC_ATGTAGAC_CGGCGACA	1528	1_day_old
CAATCTTA_ACGCGCAG_GTCCTTCG_CCATTGTG	105	1_day_old
CAATCTTA_ACTTAGAA_AAGGAATC_GTCACGTC	415	1_day_old
CAATCTTA_ACTTAGAA_AAGGAATC_TTACGCCG	1259	1_day_old
CAATCTTA_AGAGTAGA_ATGTAGAC_CGGCGACA	1783	1_day_old
CAATCTTA_AGCCGTTC_TAACGATT_GCGGTTAA	900	1_day_old
CAATCTTA_AGCCGTTC_TAACGATT_GTCACGTC	925	1_day_old
CAATCTTA_AGTCCGAG_ATGTAGAC_AATTCTAA	1545	1_day_old
CAATCTTA_ATTACCGT_AAGGAATC_TTACGCCG	1067	1_day_old
CAATCTTA_CCAGTTTA_AAGGAATC_TGCGAAGT	227	1_day_old
CAATCTTA_CCCTTGGA_GTCCTTCG_TTACGCCG	315	1_day_old
CAATCTTA_CCTGCGGG_GTCCTTCG_AATTCTAA	423	1_day_old
CAATCTTA_CGATAGGG_TAACGATT_AATTCTAA	509	1_day_old
CAATCTTA_CGCCAGAT_TAACGATT_CCATTGTG	898	1_day_old
CAATCTTA_CGGACTGC_AAGGAATC_TGCGAAGT	2214	1_day_old
CAATCTTA_CGTACCAA_TAACGATT_AATAACGT	2251	1_day_old
CAATCTTA_CTAAGCCT_AAGGAATC_GTCACGTC	488	1_day_old
CAATCTTA_CTCTCTAT_GTCCTTCG_TGCGAAGT	643	1_day_old
CAATCTTA_GAACTCGA_AAGGAATC_GCGGTTAA	851	1_day_old
CAATCTTA_GAGACGTG_GTCCTTCG_TGCGAAGT	408	1_day_old
CAATCTTA_GATTCCCA_AAGGAATC_AATAACGT	698	1_day_old
CAATCTTA_GCATTAAG_TAACGATT_CCATTGTG	769	1_day_old
CAATCTTA_GGTGAAGG_AAGGAATC_TTACGCCG	374	1_day_old
CAATCTTA_GTCGGACT_GTCCTTCG_GTCACGTC	1813	1_day_old
CAATCTTA_TAACCAAG_GTCCTTCG_AATAACGT	1176	1_day_old
CAATCTTA_TAACCAAG_GTCCTTCG_CCATTGTG	964	1_day_old
CAATCTTA_TAAGTTAC_ATGTAGAC_GTCACGTC	2072	1_day_old
CAATCTTA_TAAGTTAC_GTCCTTCG_TGCGAAGT	663	1_day_old
CAATCTTA_TATTTGCG_AAGGAATC_TTACGCCG	267	1_day_old
CAATCTTA_TATTTGCG_TAACGATT_AATAACGT	939	1_day_old
CAATCTTA_TCCGAGTT_ATGTAGAC_TGCGAAGT	1113	1_day_old
CAATCTTA_TCTGGCGA_ATGTAGAC_TGCGAAGT	496	1_day_old
CAATCTTA_TGCATACT_AAGGAATC_TTACGCCG	2609	1_day_old
CAATCTTA_TGGGCGGT_GTCCTTCG_AATAACGT	2383	1_day_old
CAATCTTA_TGTTCCTG_TAACGATT_AATAACGT	1272	1_day_old
CAATCTTA_TTCGTGCA_TAACGATT_GCGGTTAA	513	1_day_old
CAATCTTA_TTGCCTAA_AAGGAATC_CCATTGTG	922	1_day_old
CAATCTTA_TTGCCTAA_TAACGATT_GTCACGTC	638	1_day_old
CAGAGAGG_AACATGAT_AAGGAATC_GCGGTTAA	118	1_day_old
CAGAGAGG_AACATGAT_ATGTAGAC_AATAACGT	5940	1_day_old
CAGAGAGG_AACATGAT_TAACGATT_CCATTGTG	707	1_day_old
CAGAGAGG_AATCTACA_AAGGAATC_TTACGCCG	1796	1_day_old
CAGAGAGG_ACATTCGT_TAACGATT_TTACGCCG	2208	1_day_old
CAGAGAGG_ACCGGCCC_GTCCTTCG_TTACGCCG	3512	1_day_old
CAGAGAGG_ACGATAAC_GTCCTTCG_GTCACGTC	1771	1_day_old
CAGAGAGG_ACGCGCAG_TAACGATT_CGGCGACA	732	1_day_old
CAGAGAGG_ACTGCATA_GTCCTTCG_TGCGAAGT	676	1_day_old
CAGAGAGG_ACTTAGAA_GTCCTTCG_AATTCTAA	2039	1_day_old
CAGAGAGG_ACTTGTTG_GTCCTTCG_CCATTGTG	2647	1_day_old
CAGAGAGG_ACTTGTTG_GTCCTTCG_CGGCGACA	1112	1_day_old
CAGAGAGG_AGGTTGCC_GTCCTTCG_CCATTGTG	1876	1_day_old
CAGAGAGG_ATCCAGGA_AAGGAATC_AATTCTAA	1319	1_day_old
CAGAGAGG_ATTACCGT_AAGGAATC_TTACGCCG	205	1_day_old
CAGAGAGG_ATTACCGT_ATGTAGAC_AATAACGT	136	1_day_old
CAGAGAGG_ATTGGGTC_GTCCTTCG_GCGGTTAA	1465	1_day_old
CAGAGAGG_CAGCAACG_AAGGAATC_TTACGCCG	4730	1_day_old
CAGAGAGG_CCCTTGGA_TAACGATT_GTCACGTC	562	1_day_old
CAGAGAGG_CGATAGGG_GTCCTTCG_TGCGAAGT	604	1_day_old
CAGAGAGG_CGCCAGAT_GTCCTTCG_TTACGCCG	1643	1_day_old
CAGAGAGG_CGGACTGC_AAGGAATC_GCGGTTAA	650	1_day_old
CAGAGAGG_CGGACTGC_GTCCTTCG_CGGCGACA	403	1_day_old
CAGAGAGG_CGGACTGC_GTCCTTCG_TGCGAAGT	302	1_day_old
CAGAGAGG_CGTACCAA_GTCCTTCG_AATAACGT	4703	1_day_old
CAGAGAGG_CGTAGACC_TAACGATT_CGGCGACA	681	1_day_old
CAGAGAGG_CTAAGCCT_GTCCTTCG_GCGGTTAA	1443	1_day_old
CAGAGAGG_CTAGAAGT_ATGTAGAC_AATAACGT	999	1_day_old
CAGAGAGG_CTAGAAGT_GTCCTTCG_TGCGAAGT	333	1_day_old
CAGAGAGG_GACGTGGC_GTCCTTCG_CGGCGACA	1205	1_day_old
CAGAGAGG_GATTCCCA_AAGGAATC_TTACGCCG	935	1_day_old
CAGAGAGG_GCAGCCTC_ATGTAGAC_CGGCGACA	130	1_day_old
CAGAGAGG_GGGCTTGG_AAGGAATC_CGGCGACA	346	1_day_old
CAGAGAGG_GGTGAAGG_AAGGAATC_TTACGCCG	119	1_day_old
CAGAGAGG_GGTGAAGG_GTCCTTCG_AATAACGT	1029	1_day_old
CAGAGAGG_GGTGAAGG_TAACGATT_AATTCTAA	1154	1_day_old
CAGAGAGG_GTAAGGAG_ATGTAGAC_AATAACGT	1631	1_day_old
CAGAGAGG_TAACCAAG_GTCCTTCG_TTACGCCG	2709	1_day_old
CAGAGAGG_TAAGTTAC_TAACGATT_CGGCGACA	580	1_day_old
CAGAGAGG_TACTGACC_AAGGAATC_AATAACGT	1414	1_day_old
CAGAGAGG_TAGATCGC_ATGTAGAC_AATAACGT	264	1_day_old
CAGAGAGG_TATTTGCG_TAACGATT_CCATTGTG	465	1_day_old
CAGAGAGG_TCAAGAGC_ATGTAGAC_CGGCGACA	8460	1_day_old
CAGAGAGG_TCTGGCGA_GTCCTTCG_CCATTGTG	1694	1_day_old
CAGAGAGG_TGATTGTT_AAGGAATC_CGGCGACA	511	1_day_old
CAGAGAGG_TGATTGTT_GTCCTTCG_AATAACGT	133	1_day_old
CAGAGAGG_TGGAAATC_AAGGAATC_CCATTGTG	1778	1_day_old
CAGAGAGG_TTCGTGCA_ATGTAGAC_CCATTGTG	1330	1_day_old
CAGAGAGG_TTGCCTAA_ATGTAGAC_TTACGCCG	2505	1_day_old
CATCCTGT_AGAGTAGA_ATGTAGAC_AATTCTAA	1057	1_day_old
CATCCTGT_AGCCGTTC_AAGGAATC_GTCACGTC	1451	1_day_old
CATCCTGT_CAGCAACG_GTCCTTCG_TGCGAAGT	664	1_day_old
CATCCTGT_CAGCAACG_TAACGATT_AATAACGT	643	1_day_old
CATCCTGT_CCAGTTTA_ATGTAGAC_TTACGCCG	877	1_day_old
CATCCTGT_CGTAGACC_AAGGAATC_AATTCTAA	1298	1_day_old
CATCCTGT_CTTTAACA_GTCCTTCG_TTACGCCG	3304	1_day_old
CATCCTGT_GAGACGTG_ATGTAGAC_CCATTGTG	4167	1_day_old
CATCCTGT_GCAGCCTC_ATGTAGAC_AATTCTAA	1577	1_day_old
CATCCTGT_GGCACGGA_AAGGAATC_CCATTGTG	1233	1_day_old
CATCCTGT_GGTTCAAT_GTCCTTCG_CGGCGACA	1049	1_day_old
CATCCTGT_TAAGTTAC_ATGTAGAC_GTCACGTC	1264	1_day_old
CATCCTGT_TAGATCGC_TAACGATT_GTCACGTC	730	1_day_old
CATCCTGT_TATCCTCT_TAACGATT_GTCACGTC	318	1_day_old
CATCCTGT_TCACATGG_GTCCTTCG_CCATTGTG	1158	1_day_old
CATCCTGT_TCCGAGTT_ATGTAGAC_AATAACGT	1451	1_day_old
CATCCTGT_TCCGAGTT_TAACGATT_AATTCTAA	531	1_day_old
CATCCTGT_TGATGAAA_GTCCTTCG_CGGCGACA	566	1_day_old
CATCCTGT_TGTTCCTG_AAGGAATC_TGCGAAGT	1004	1_day_old
CATCCTGT_TTTCTAGC_TAACGATT_TTACGCCG	2525	1_day_old
CATCGACC_AAGGAGTA_GTCCTTCG_AATTCTAA	5127	1_day_old
CATCGACC_ACCGGCCC_GTCCTTCG_CGGCGACA	1246	1_day_old
CATCGACC_ACGCGCAG_ATGTAGAC_GCGGTTAA	1169	1_day_old
CATCGACC_ACTGCATA_AAGGAATC_CGGCGACA	467	1_day_old
CATCGACC_ACTTAGAA_TAACGATT_CGGCGACA	649	1_day_old
CATCGACC_ATTACCGT_AAGGAATC_TTACGCCG	458	1_day_old
CATCGACC_ATTACCGT_GTCCTTCG_AATTCTAA	3115	1_day_old
CATCGACC_ATTGGGTC_GTCCTTCG_TTACGCCG	316	1_day_old
CATCGACC_CCAGTTTA_AAGGAATC_TGCGAAGT	128	1_day_old
CATCGACC_CCAGTTTA_GTCCTTCG_GTCACGTC	2265	1_day_old
CATCGACC_CCCTTGGA_GTCCTTCG_GCGGTTAA	1643	1_day_old
CATCGACC_CCCTTGGA_GTCCTTCG_GTCACGTC	2462	1_day_old
CATCGACC_CCCTTGGA_GTCCTTCG_TTACGCCG	590	1_day_old
CATCGACC_CGCCAGAT_AAGGAATC_CCATTGTG	1299	1_day_old
CATCGACC_CGCCAGAT_TAACGATT_CCATTGTG	632	1_day_old
CATCGACC_CGGACTGC_TAACGATT_TTACGCCG	1312	1_day_old
CATCGACC_CTAAGCCT_AAGGAATC_GTCACGTC	376	1_day_old
CATCGACC_CTCTCTAT_AAGGAATC_TTACGCCG	652	1_day_old
CATCGACC_CTTTAACA_TAACGATT_AATAACGT	1365	1_day_old
CATCGACC_GAACTCGA_GTCCTTCG_CGGCGACA	1743	1_day_old
CATCGACC_GAACTCGA_TAACGATT_AATTCTAA	583	1_day_old
CATCGACC_GAACTCGA_TAACGATT_GTCACGTC	565	1_day_old
CATCGACC_GACGTGGC_AAGGAATC_CGGCGACA	1198	1_day_old
CATCGACC_GACGTGGC_GTCCTTCG_CGGCGACA	1044	1_day_old
CATCGACC_GAGACGTG_ATGTAGAC_AATAACGT	2557	1_day_old
CATCGACC_GAGACGTG_TAACGATT_AATTCTAA	1019	1_day_old
CATCGACC_GCATTAAG_GTCCTTCG_TTACGCCG	1117	1_day_old
CATCGACC_GCATTAAG_TAACGATT_AATTCTAA	530	1_day_old
CATCGACC_GGCACGGA_AAGGAATC_GCGGTTAA	136	1_day_old
CATCGACC_GGCACGGA_TAACGATT_AATAACGT	971	1_day_old
CATCGACC_GGGCTTGG_AAGGAATC_TTACGCCG	2299	1_day_old
CATCGACC_GTAAGGAG_ATGTAGAC_AATTCTAA	3452	1_day_old
CATCGACC_TAAGTTAC_GTCCTTCG_AATTCTAA	4305	1_day_old
CATCGACC_TACTGACC_AAGGAATC_GTCACGTC	1223	1_day_old
CATCGACC_TACTGACC_TAACGATT_GCGGTTAA	3304	1_day_old
CATCGACC_TAGATCGC_AAGGAATC_TTACGCCG	145	1_day_old
CATCGACC_TATCCTCT_TAACGATT_AATTCTAA	981	1_day_old
CATCGACC_TATTTGCG_ATGTAGAC_CCATTGTG	1809	1_day_old
CATCGACC_TCAAGAGC_AAGGAATC_CCATTGTG	599	1_day_old
CATCGACC_TCCATCAA_GTCCTTCG_CCATTGTG	1649	1_day_old
CATCGACC_TCCGAGTT_GTCCTTCG_TTACGCCG	2802	1_day_old
CATCGACC_TCTGGCGA_GTCCTTCG_GCGGTTAA	1802	1_day_old
CATCGACC_TGATGAAA_TAACGATT_CGGCGACA	461	1_day_old
CATCGACC_TGCATACT_TAACGATT_CCATTGTG	222	1_day_old
CATCGACC_TGTTCCTG_AAGGAATC_CGGCGACA	592	1_day_old
CCAAATAA_ACCGGCCC_AAGGAATC_TGCGAAGT	258	1_day_old
CCAAATAA_ACGATAAC_ATGTAGAC_GCGGTTAA	976	1_day_old
CCAAATAA_ACTGCATA_TAACGATT_AATTCTAA	910	1_day_old
CCAAATAA_AGAGATCT_AAGGAATC_AATTCTAA	112	1_day_old
CCAAATAA_AGCCGTTC_AAGGAATC_TGCGAAGT	1121	1_day_old
CCAAATAA_AGCCGTTC_GTCCTTCG_TGCGAAGT	5188	1_day_old
CCAAATAA_AGGTTGCC_AAGGAATC_GCGGTTAA	641	1_day_old
CCAAATAA_AGTCCGAG_AAGGAATC_AATTCTAA	434	1_day_old
CCAAATAA_CCAGTTTA_AAGGAATC_AATAACGT	3818	1_day_old
CCAAATAA_CGGACTGC_AAGGAATC_CGGCGACA	5318	1_day_old
CCAAATAA_GACGTGGC_AAGGAATC_CCATTGTG	4442	1_day_old
CCAAATAA_GACGTGGC_ATGTAGAC_CCATTGTG	1380	1_day_old
CCAAATAA_GATTCCCA_GTCCTTCG_TTACGCCG	614	1_day_old
CCAAATAA_GGTGAAGG_GTCCTTCG_AATAACGT	2130	1_day_old
CCAAATAA_GGTGAAGG_TAACGATT_AATTCTAA	403	1_day_old
CCAAATAA_GGTTCAAT_TAACGATT_AATTCTAA	1178	1_day_old
CCAAATAA_GTAAGGAG_GTCCTTCG_GTCACGTC	2190	1_day_old
CCAAATAA_GTGTATCG_GTCCTTCG_TTACGCCG	1927	1_day_old
CCAAATAA_TCACATGG_AAGGAATC_CCATTGTG	1104	1_day_old
CCAAATAA_TCACATGG_GTCCTTCG_AATTCTAA	1770	1_day_old
CCAAATAA_TCACATGG_TAACGATT_CCATTGTG	502	1_day_old
CCAAATAA_TCCGAGTT_AAGGAATC_AATAACGT	1564	1_day_old
CCAAATAA_TGCATACT_GTCCTTCG_AATAACGT	1213	1_day_old
CCAAATAA_TTAACTTG_ATGTAGAC_TGCGAAGT	305	1_day_old
CCAACACG_ACTTAGAA_GTCCTTCG_CGGCGACA	975	1_day_old
CCAACACG_AGAGATCT_TAACGATT_GCGGTTAA	148	1_day_old
CCAACACG_AGAGTAGA_GTCCTTCG_AATAACGT	3818	1_day_old
CCAACACG_AGTCCGAG_TAACGATT_GCGGTTAA	1411	1_day_old
CCAACACG_ATCCAGGA_ATGTAGAC_TTACGCCG	4133	1_day_old
CCAACACG_ATCCAGGA_GTCCTTCG_AATTCTAA	1376	1_day_old
CCAACACG_ATTACCGT_TAACGATT_CCATTGTG	767	1_day_old
CCAACACG_ATTGGGTC_TAACGATT_AATTCTAA	1717	1_day_old
CCAACACG_CCAGTTTA_AAGGAATC_AATAACGT	3869	1_day_old
CCAACACG_CCCTTGGA_ATGTAGAC_TTACGCCG	279	1_day_old
CCAACACG_CCTGCGGG_AAGGAATC_AATAACGT	382	1_day_old
CCAACACG_CGCCAGAT_TAACGATT_CGGCGACA	711	1_day_old
CCAACACG_CGGACTGC_TAACGATT_AATTCTAA	498	1_day_old
CCAACACG_CGTACCAA_AAGGAATC_TGCGAAGT	368	1_day_old
CCAACACG_CGTAGACC_GTCCTTCG_TTACGCCG	1949	1_day_old
CCAACACG_CTAGAAGT_AAGGAATC_AATAACGT	5041	1_day_old
CCAACACG_CTAGAAGT_AAGGAATC_TTACGCCG	916	1_day_old
CCAACACG_GAACTCGA_TAACGATT_GTCACGTC	732	1_day_old
CCAACACG_GACGTGGC_GTCCTTCG_GCGGTTAA	175	1_day_old
CCAACACG_GCAGCCTC_GTCCTTCG_TTACGCCG	2344	1_day_old
CCAACACG_GCATTAAG_ATGTAGAC_AATTCTAA	1327	1_day_old
CCAACACG_GGGCTTGG_GTCCTTCG_CCATTGTG	2577	1_day_old
CCAACACG_GGTGAAGG_AAGGAATC_CGGCGACA	678	1_day_old
CCAACACG_GTAAGGAG_GTCCTTCG_CCATTGTG	987	1_day_old
CCAACACG_GTGTATCG_AAGGAATC_AATAACGT	109	1_day_old
CCAACACG_GTGTATCG_ATGTAGAC_CCATTGTG	685	1_day_old
CCAACACG_TAACCAAG_AAGGAATC_GCGGTTAA	4565	1_day_old
CCAACACG_TAAGTTAC_ATGTAGAC_AATAACGT	888	1_day_old
CCAACACG_TATCCTCT_ATGTAGAC_AATAACGT	1518	1_day_old
CCAACACG_TATCCTCT_TAACGATT_AATAACGT	2007	1_day_old
CCAACACG_TCAAGAGC_AAGGAATC_AATTCTAA	1432	1_day_old
CCAACACG_TCCATCAA_GTCCTTCG_TGCGAAGT	231	1_day_old
CCAACACG_TCTGGCGA_TAACGATT_CCATTGTG	1184	1_day_old
CCAACACG_TGATGAAA_TAACGATT_TTACGCCG	1200	1_day_old
CCAACACG_TGCATACT_TAACGATT_CGGCGACA	484	1_day_old
CCAACACG_TGGGCGGT_AAGGAATC_GCGGTTAA	792	1_day_old
CCAACACG_TGGGCGGT_TAACGATT_GCGGTTAA	582	1_day_old
CCAACACG_TGTTCCTG_AAGGAATC_CGGCGACA	561	1_day_old
CCAACACG_TGTTCCTG_TAACGATT_AATTCTAA	3699	1_day_old
CCAACACG_TTGCCTAA_AAGGAATC_CGGCGACA	1349	1_day_old
CCGTTTGT_ACCGGCCC_TAACGATT_AATTCTAA	500	1_day_old
CCGTTTGT_ACGCGCAG_AAGGAATC_TTACGCCG	2485	1_day_old
CCGTTTGT_ACTTAGAA_TAACGATT_GCGGTTAA	296	1_day_old
CCGTTTGT_AGAGTAGA_TAACGATT_AATTCTAA	258	1_day_old
CCGTTTGT_AGTCCGAG_ATGTAGAC_AATTCTAA	876	1_day_old
CCGTTTGT_ATCCAGGA_AAGGAATC_TTACGCCG	2995	1_day_old
CCGTTTGT_CCAGTTTA_AAGGAATC_TTACGCCG	1703	1_day_old
CCGTTTGT_CCTTATGT_GTCCTTCG_GCGGTTAA	800	1_day_old
CCGTTTGT_CGTACCAA_AAGGAATC_AATAACGT	2704	1_day_old
CCGTTTGT_CTAAGCCT_GTCCTTCG_CGGCGACA	588	1_day_old
CCGTTTGT_CTAGAAGT_AAGGAATC_TGCGAAGT	629	1_day_old
CCGTTTGT_GATCATTC_ATGTAGAC_CCATTGTG	1570	1_day_old
CCGTTTGT_GATTCCCA_GTCCTTCG_AATTCTAA	1036	1_day_old
CCGTTTGT_GCAAATTT_AAGGAATC_GCGGTTAA	163	1_day_old
CCGTTTGT_GCAAATTT_TAACGATT_TTACGCCG	3493	1_day_old
CCGTTTGT_GCAGCCTC_GTCCTTCG_GTCACGTC	684	1_day_old
CCGTTTGT_GCATTAAG_AAGGAATC_TTACGCCG	354	1_day_old
CCGTTTGT_GGTGAAGG_AAGGAATC_CGGCGACA	3470	1_day_old
CCGTTTGT_GTAAGGAG_GTCCTTCG_TTACGCCG	168	1_day_old
CCGTTTGT_GTGTATCG_GTCCTTCG_GCGGTTAA	112	1_day_old
CCGTTTGT_TAAGTTAC_AAGGAATC_TTACGCCG	161	1_day_old
CCGTTTGT_TATCCTCT_TAACGATT_GTCACGTC	459	1_day_old
CCGTTTGT_TCAAGAGC_AAGGAATC_CGGCGACA	941	1_day_old
CCGTTTGT_TGATGAAA_GTCCTTCG_GCGGTTAA	2108	1_day_old
CCGTTTGT_TGATTGTT_GTCCTTCG_CGGCGACA	622	1_day_old
CCGTTTGT_TGGAAATC_GTCCTTCG_AATAACGT	213	1_day_old
CCGTTTGT_TGTTCCTG_GTCCTTCG_CGGCGACA	1569	1_day_old
CCGTTTGT_TTAACTTG_AAGGAATC_TTACGCCG	125	1_day_old
CCGTTTGT_TTAACTTG_ATGTAGAC_GCGGTTAA	792	1_day_old
CCTCGCAG_ACTGCATA_TAACGATT_AATAACGT	815	1_day_old
CCTCGCAG_ACTTGTTG_AAGGAATC_TGCGAAGT	544	1_day_old
CCTCGCAG_AGCCGTTC_AAGGAATC_AATAACGT	1508	1_day_old
CCTCGCAG_AGGTTGCC_AAGGAATC_CCATTGTG	1664	1_day_old
CCTCGCAG_ATTACCGT_AAGGAATC_AATTCTAA	106	1_day_old
CCTCGCAG_CCACCGTT_TAACGATT_AATAACGT	148	1_day_old
CCTCGCAG_CCCTTGGA_TAACGATT_TTACGCCG	3254	1_day_old
CCTCGCAG_CGCCAGAT_AAGGAATC_GCGGTTAA	913	1_day_old
CCTCGCAG_CGTAGACC_GTCCTTCG_TGCGAAGT	752	1_day_old
CCTCGCAG_GATCATTC_TAACGATT_AATAACGT	977	1_day_old
CCTCGCAG_GATCATTC_TAACGATT_TGCGAAGT	1220	1_day_old
CCTCGCAG_GCATTAAG_AAGGAATC_CCATTGTG	1050	1_day_old
CCTCGCAG_TCCATCAA_TAACGATT_AATTCTAA	955	1_day_old
CCTCGCAG_TCCGAGTT_GTCCTTCG_CGGCGACA	3711	1_day_old
CCTCGCAG_TCTGGCGA_AAGGAATC_AATAACGT	1987	1_day_old
CCTCGCAG_TCTGGCGA_AAGGAATC_TTACGCCG	424	1_day_old
CCTCGCAG_TGGAAATC_TAACGATT_TTACGCCG	205	1_day_old
CCTCGCAG_TGTTCCTG_GTCCTTCG_AATAACGT	1458	1_day_old
CCTCGCAG_TTAACTTG_GTCCTTCG_GCGGTTAA	1219	1_day_old
CCTCGCAG_TTGCCTAA_TAACGATT_AATTCTAA	1409	1_day_old
CCTCGCAG_TTGCCTAA_TAACGATT_TGCGAAGT	511	1_day_old
CCTCGCAG_TTTCTAGC_GTCCTTCG_CCATTGTG	1481	1_day_old
CGAGGCTG_AAGGAGTA_AAGGAATC_TTACGCCG	1092	1_day_old
CGAGGCTG_ACCGGCCC_AAGGAATC_AATTCTAA	1685	1_day_old
CGAGGCTG_ACGCGCAG_ATGTAGAC_TGCGAAGT	344	1_day_old
CGAGGCTG_ACTGCATA_AAGGAATC_CCATTGTG	387	1_day_old
CGAGGCTG_ACTTGTTG_GTCCTTCG_CCATTGTG	177	1_day_old
CGAGGCTG_CCTGCGGG_GTCCTTCG_CCATTGTG	132	1_day_old
CGAGGCTG_CGATAGGG_GTCCTTCG_CCATTGTG	106	1_day_old
CGAGGCTG_GCAGCCTC_TAACGATT_TTACGCCG	4213	1_day_old
CGAGGCTG_GGTGAAGG_AAGGAATC_TTACGCCG	104	1_day_old
CGAGGCTG_GGTGAAGG_GTCCTTCG_CCATTGTG	317	1_day_old
CGAGGCTG_GTCGGACT_GTCCTTCG_GTCACGTC	220	1_day_old
CGAGGCTG_GTGTATCG_GTCCTTCG_CCATTGTG	182	1_day_old
CGAGGCTG_TAAGTTAC_ATGTAGAC_CCATTGTG	123	1_day_old
CGAGGCTG_TACTGACC_AAGGAATC_TTACGCCG	1581	1_day_old
CGAGGCTG_TACTGACC_GTCCTTCG_CCATTGTG	142	1_day_old
CGAGGCTG_TATCCTCT_ATGTAGAC_CGGCGACA	2496	1_day_old
CGAGGCTG_TATCCTCT_GTCCTTCG_CCATTGTG	369	1_day_old
CGAGGCTG_TCACATGG_TAACGATT_TTACGCCG	1062	1_day_old
CGAGGCTG_TCCGAGTT_TAACGATT_CGGCGACA	1372	1_day_old
CGAGGCTG_TTGCCTAA_ATGTAGAC_GCGGTTAA	1585	1_day_old
CGCGGACA_AACATGAT_TAACGATT_CCATTGTG	1242	1_day_old
CGCGGACA_ACATTCGT_TAACGATT_AATTCTAA	153	1_day_old
CGCGGACA_AGAGTAGA_ATGTAGAC_CCATTGTG	1085	1_day_old
CGCGGACA_AGTCCGAG_GTCCTTCG_AATAACGT	2163	1_day_old
CGCGGACA_ATCCAGGA_ATGTAGAC_TGCGAAGT	790	1_day_old
CGCGGACA_ATGGTCAT_AAGGAATC_AATAACGT	5409	1_day_old
CGCGGACA_ATTGGGTC_GTCCTTCG_TTACGCCG	604	1_day_old
CGCGGACA_CAGCAACG_AAGGAATC_CCATTGTG	113	1_day_old
CGCGGACA_CCTGCGGG_TAACGATT_CGGCGACA	1953	1_day_old
CGCGGACA_CGTACCAA_TAACGATT_CGGCGACA	906	1_day_old
CGCGGACA_GCAGCCTC_ATGTAGAC_TTACGCCG	1379	1_day_old
CGCGGACA_GTGTATCG_GTCCTTCG_CGGCGACA	1129	1_day_old
CGCGGACA_TAAGTTAC_ATGTAGAC_GTCACGTC	7422	1_day_old
CGCGGACA_TCACATGG_GTCCTTCG_TGCGAAGT	455	1_day_old
CGCGGACA_TCCATCAA_ATGTAGAC_TTACGCCG	1892	1_day_old
CGCGGACA_TGGGCGGT_ATGTAGAC_CCATTGTG	1478	1_day_old
CGGCCAAT_AACATGAT_TAACGATT_GTCACGTC	128	1_day_old
CGGCCAAT_ACTTAGAA_GTCCTTCG_GTCACGTC	181	1_day_old
CGGCCAAT_AGAGTAGA_TAACGATT_GCGGTTAA	1261	1_day_old
CGGCCAAT_ATCGAATG_AAGGAATC_CGGCGACA	5279	1_day_old
CGGCCAAT_ATCGAATG_GTCCTTCG_GTCACGTC	980	1_day_old
CGGCCAAT_CCAGTTTA_AAGGAATC_TTACGCCG	1855	1_day_old
CGGCCAAT_CCAGTTTA_GTCCTTCG_AATTCTAA	1643	1_day_old
CGGCCAAT_CCAGTTTA_GTCCTTCG_CGGCGACA	990	1_day_old
CGGCCAAT_CGATAGGG_AAGGAATC_GTCACGTC	322	1_day_old
CGGCCAAT_CGCCAGAT_TAACGATT_TTACGCCG	2012	1_day_old
CGGCCAAT_CGTACCAA_ATGTAGAC_AATAACGT	3811	1_day_old
CGGCCAAT_CGTAGACC_ATGTAGAC_TTACGCCG	2569	1_day_old
CGGCCAAT_CTAAGCCT_GTCCTTCG_GCGGTTAA	2284	1_day_old
CGGCCAAT_CTTTAACA_TAACGATT_AATAACGT	677	1_day_old
CGGCCAAT_GATCATTC_TAACGATT_AATAACGT	645	1_day_old
CGGCCAAT_GATTCCCA_AAGGAATC_TTACGCCG	626	1_day_old
CGGCCAAT_GCAGCCTC_ATGTAGAC_CGGCGACA	607	1_day_old
CGGCCAAT_GCATTAAG_ATGTAGAC_CCATTGTG	694	1_day_old
CGGCCAAT_GCATTAAG_ATGTAGAC_TTACGCCG	1141	1_day_old
CGGCCAAT_GTAAGGAG_GTCCTTCG_GCGGTTAA	1821	1_day_old
CGGCCAAT_TAACCAAG_AAGGAATC_GCGGTTAA	972	1_day_old
CGGCCAAT_TAGATCGC_GTCCTTCG_TGCGAAGT	1179	1_day_old
CGGCCAAT_TCACATGG_ATGTAGAC_TTACGCCG	2512	1_day_old
CGGCCAAT_TCCGAGTT_GTCCTTCG_GCGGTTAA	828	1_day_old
CGGCCAAT_TGATTGTT_AAGGAATC_TTACGCCG	879	1_day_old
CGGTTCCC_ACTTGTTG_ATGTAGAC_AATTCTAA	415	1_day_old
CGGTTCCC_AGAGTAGA_GTCCTTCG_CGGCGACA	2873	1_day_old
CGGTTCCC_CCAGTTTA_ATGTAGAC_TTACGCCG	1376	1_day_old
CGGTTCCC_CCCTTGGA_TAACGATT_TGCGAAGT	409	1_day_old
CGGTTCCC_CCTTATGT_AAGGAATC_TTACGCCG	994	1_day_old
CGGTTCCC_CGATAGGG_ATGTAGAC_CCATTGTG	613	1_day_old
CGGTTCCC_CGTAGACC_AAGGAATC_GCGGTTAA	541	1_day_old
CGGTTCCC_GACGTGGC_ATGTAGAC_AATAACGT	1400	1_day_old
CGGTTCCC_GCATTAAG_TAACGATT_GCGGTTAA	1211	1_day_old
CGGTTCCC_GGTGAAGG_AAGGAATC_TTACGCCG	110	1_day_old
CGGTTCCC_GTGTATCG_TAACGATT_AATAACGT	172	1_day_old
CGGTTCCC_TGTTCCTG_TAACGATT_CGGCGACA	209	1_day_old
CGTACTAG_AAGGAGTA_ATGTAGAC_CGGCGACA	2305	1_day_old
CGTACTAG_AAGGAGTA_GTCCTTCG_CCATTGTG	138	1_day_old
CGTACTAG_ACTGCATA_TAACGATT_AATTCTAA	381	1_day_old
CGTACTAG_ATGGTCAT_TAACGATT_GCGGTTAA	265	1_day_old
CGTACTAG_CAGCAACG_TAACGATT_CGGCGACA	263	1_day_old
CGTACTAG_CCAGTTTA_GTCCTTCG_AATAACGT	150	1_day_old
CGTACTAG_CCCTTGGA_GTCCTTCG_GCGGTTAA	498	1_day_old
CGTACTAG_CCCTTGGA_TAACGATT_TGCGAAGT	185	1_day_old
CGTACTAG_CCTGCGGG_AAGGAATC_AATTCTAA	129	1_day_old
CGTACTAG_CCTTATGT_AAGGAATC_CCATTGTG	3119	1_day_old
CGTACTAG_CGATAGGG_AAGGAATC_GCGGTTAA	1267	1_day_old
CGTACTAG_CTTTAACA_TAACGATT_CGGCGACA	1202	1_day_old
CGTACTAG_GAGACGTG_ATGTAGAC_AATAACGT	167	1_day_old
CGTACTAG_GAGACGTG_GTCCTTCG_TGCGAAGT	159	1_day_old
CGTACTAG_GGCACGGA_AAGGAATC_CCATTGTG	1623	1_day_old
CGTACTAG_GGCACGGA_GTCCTTCG_CGGCGACA	1339	1_day_old
CGTACTAG_GGTGAAGG_TAACGATT_TTACGCCG	432	1_day_old
CGTACTAG_GTAAGGAG_AAGGAATC_GCGGTTAA	1484	1_day_old
CGTACTAG_GTAAGGAG_ATGTAGAC_GTCACGTC	1780	1_day_old
CGTACTAG_GTAAGGAG_ATGTAGAC_TGCGAAGT	825	1_day_old
CGTACTAG_GTCGGACT_GTCCTTCG_GTCACGTC	1611	1_day_old
CGTACTAG_TAACCAAG_AAGGAATC_AATTCTAA	1613	1_day_old
CGTACTAG_TCAAGAGC_TAACGATT_CCATTGTG	359	1_day_old
CGTACTAG_TCACATGG_TAACGATT_TTACGCCG	1826	1_day_old
CGTACTAG_TGATGAAA_ATGTAGAC_CCATTGTG	579	1_day_old
CGTACTAG_TGGGCGGT_AAGGAATC_AATTCTAA	1453	1_day_old
CGTACTAG_TTGCCTAA_AAGGAATC_CCATTGTG	2232	1_day_old
CTCATGGG_AATCTACA_GTCCTTCG_AATTCTAA	2203	1_day_old
CTCATGGG_ACATTCGT_AAGGAATC_CCATTGTG	301	1_day_old
CTCATGGG_ACCGGCCC_AAGGAATC_GCGGTTAA	396	1_day_old
CTCATGGG_ACTGCATA_TAACGATT_GTCACGTC	624	1_day_old
CTCATGGG_AGTCCGAG_GTCCTTCG_TTACGCCG	164	1_day_old
CTCATGGG_ATCCAGGA_AAGGAATC_TTACGCCG	708	1_day_old
CTCATGGG_ATTACCGT_TAACGATT_GTCACGTC	646	1_day_old
CTCATGGG_CCAGTTTA_GTCCTTCG_CGGCGACA	1034	1_day_old
CTCATGGG_CGTAGACC_GTCCTTCG_TTACGCCG	924	1_day_old
CTCATGGG_CTAGAAGT_ATGTAGAC_AATAACGT	1887	1_day_old
CTCATGGG_GAACTCGA_TAACGATT_TGCGAAGT	641	1_day_old
CTCATGGG_GACGTGGC_AAGGAATC_TGCGAAGT	154	1_day_old
CTCATGGG_GACGTGGC_ATGTAGAC_AATAACGT	645	1_day_old
CTCATGGG_GACGTGGC_ATGTAGAC_GTCACGTC	212	1_day_old
CTCATGGG_GATTCCCA_AAGGAATC_CGGCGACA	1091	1_day_old
CTCATGGG_TATTTGCG_GTCCTTCG_CGGCGACA	301	1_day_old
CTCATGGG_TATTTGCG_TAACGATT_TTACGCCG	1160	1_day_old
CTCATGGG_TCACATGG_ATGTAGAC_AATAACGT	1669	1_day_old
CTCATGGG_TGATGAAA_AAGGAATC_TTACGCCG	1138	1_day_old
CTCATGGG_TGCATACT_AAGGAATC_GTCACGTC	1349	1_day_old
CTCTCTAC_AAGGAGTA_GTCCTTCG_CCATTGTG	165	1_day_old
CTCTCTAC_ACATTCGT_ATGTAGAC_GTCACGTC	1216	1_day_old
CTCTCTAC_ACGCGCAG_GTCCTTCG_CCATTGTG	1375	1_day_old
CTCTCTAC_ACGCGCAG_TAACGATT_TTACGCCG	167	1_day_old
CTCTCTAC_ACTTAGAA_AAGGAATC_CGGCGACA	551	1_day_old
CTCTCTAC_ATCCAGGA_TAACGATT_TTACGCCG	446	1_day_old
CTCTCTAC_ATCGAATG_GTCCTTCG_TGCGAAGT	433	1_day_old
CTCTCTAC_CCAGTTTA_GTCCTTCG_AATAACGT	111	1_day_old
CTCTCTAC_CCCTTGGA_GTCCTTCG_TTACGCCG	298	1_day_old
CTCTCTAC_CGATAGGG_AAGGAATC_AATTCTAA	470	1_day_old
CTCTCTAC_CGATAGGG_ATGTAGAC_CGGCGACA	1204	1_day_old
CTCTCTAC_CGATAGGG_TAACGATT_CCATTGTG	132	1_day_old
CTCTCTAC_CGCCAGAT_AAGGAATC_TGCGAAGT	1940	1_day_old
CTCTCTAC_CGCCAGAT_GTCCTTCG_AATAACGT	1419	1_day_old
CTCTCTAC_CGTAGACC_GTCCTTCG_GCGGTTAA	184	1_day_old
CTCTCTAC_CTAAGCCT_AAGGAATC_GTCACGTC	158	1_day_old
CTCTCTAC_GCAGCCTC_TAACGATT_GTCACGTC	461	1_day_old
CTCTCTAC_GGCACGGA_GTCCTTCG_AATAACGT	2495	1_day_old
CTCTCTAC_GGCACGGA_GTCCTTCG_GCGGTTAA	161	1_day_old
CTCTCTAC_GGTGAAGG_GTCCTTCG_GTCACGTC	401	1_day_old
CTCTCTAC_GTAAGGAG_ATGTAGAC_CCATTGTG	360	1_day_old
CTCTCTAC_TTAACTTG_GTCCTTCG_TGCGAAGT	220	1_day_old
CTCTCTAC_TTGCCTAA_AAGGAATC_GTCACGTC	198	1_day_old
CTTGGGTC_AAGGAGTA_ATGTAGAC_GTCACGTC	882	1_day_old
CTTGGGTC_ACATTCGT_AAGGAATC_CCATTGTG	1343	1_day_old
CTTGGGTC_ACCGGCCC_AAGGAATC_AATTCTAA	2002	1_day_old
CTTGGGTC_ACCGGCCC_GTCCTTCG_TGCGAAGT	733	1_day_old
CTTGGGTC_ACTTGTTG_ATGTAGAC_GCGGTTAA	1924	1_day_old
CTTGGGTC_AGAGTAGA_AAGGAATC_TGCGAAGT	1365	1_day_old
CTTGGGTC_AGAGTAGA_ATGTAGAC_TGCGAAGT	680	1_day_old
CTTGGGTC_AGTCCGAG_ATGTAGAC_TTACGCCG	1014	1_day_old
CTTGGGTC_CCAGTTTA_ATGTAGAC_GTCACGTC	4770	1_day_old
CTTGGGTC_CCCTTGGA_AAGGAATC_AATAACGT	1631	1_day_old
CTTGGGTC_CCCTTGGA_AAGGAATC_GTCACGTC	1961	1_day_old
CTTGGGTC_CCCTTGGA_GTCCTTCG_CGGCGACA	832	1_day_old
CTTGGGTC_CCTTATGT_TAACGATT_GTCACGTC	2279	1_day_old
CTTGGGTC_CGGACTGC_GTCCTTCG_TGCGAAGT	838	1_day_old
CTTGGGTC_CGTAGACC_GTCCTTCG_TTACGCCG	1502	1_day_old
CTTGGGTC_GATCATTC_AAGGAATC_CCATTGTG	1569	1_day_old
CTTGGGTC_GGTTCAAT_ATGTAGAC_GCGGTTAA	1344	1_day_old
CTTGGGTC_GTAAGGAG_AAGGAATC_TTACGCCG	1037	1_day_old
CTTGGGTC_TAAGTTAC_AAGGAATC_GCGGTTAA	1733	1_day_old
CTTGGGTC_TAAGTTAC_TAACGATT_GCGGTTAA	2814	1_day_old
CTTGGGTC_TACTGACC_GTCCTTCG_TTACGCCG	2688	1_day_old
CTTGGGTC_TCAAGAGC_AAGGAATC_AATTCTAA	1464	1_day_old
CTTGGGTC_TCCGAGTT_TAACGATT_CGGCGACA	515	1_day_old
CTTGGGTC_TTAACTTG_TAACGATT_TGCGAAGT	620	1_day_old
CTTGGGTC_TTCGTGCA_AAGGAATC_AATTCTAA	2134	1_day_old
CTTGGGTC_TTCGTGCA_TAACGATT_GTCACGTC	1045	1_day_old
GAAATGCC_ACGCGCAG_GTCCTTCG_CCATTGTG	520	1_day_old
GAAATGCC_ACTTGTTG_AAGGAATC_AATAACGT	2675	1_day_old
GAAATGCC_AGAGTAGA_GTCCTTCG_CCATTGTG	1214	1_day_old
GAAATGCC_AGCCGTTC_ATGTAGAC_GTCACGTC	3415	1_day_old
GAAATGCC_AGGTTGCC_ATGTAGAC_CCATTGTG	1576	1_day_old
GAAATGCC_ATGGTCAT_AAGGAATC_AATTCTAA	3764	1_day_old
GAAATGCC_ATTACCGT_AAGGAATC_GTCACGTC	5027	1_day_old
GAAATGCC_CAGCAACG_GTCCTTCG_TTACGCCG	1932	1_day_old
GAAATGCC_CAGCAACG_TAACGATT_GCGGTTAA	723	1_day_old
GAAATGCC_CCAGTTTA_AAGGAATC_CCATTGTG	854	1_day_old
GAAATGCC_CCCTTGGA_AAGGAATC_CGGCGACA	1603	1_day_old
GAAATGCC_CCCTTGGA_GTCCTTCG_TTACGCCG	122	1_day_old
GAAATGCC_CCTTATGT_GTCCTTCG_GCGGTTAA	1030	1_day_old
GAAATGCC_CCTTATGT_TAACGATT_GTCACGTC	339	1_day_old
GAAATGCC_CGATAGGG_ATGTAGAC_CGGCGACA	531	1_day_old
GAAATGCC_CGATAGGG_ATGTAGAC_GTCACGTC	1078	1_day_old
GAAATGCC_CGATAGGG_TAACGATT_CCATTGTG	2996	1_day_old
GAAATGCC_CTAAGCCT_TAACGATT_GCGGTTAA	3759	1_day_old
GAAATGCC_CTAGAAGT_ATGTAGAC_TGCGAAGT	2298	1_day_old
GAAATGCC_GATTCCCA_AAGGAATC_TTACGCCG	132	1_day_old
GAAATGCC_GCAAATTT_AAGGAATC_CCATTGTG	819	1_day_old
GAAATGCC_GGTGAAGG_GTCCTTCG_TTACGCCG	105	1_day_old
GAAATGCC_GGTTCAAT_ATGTAGAC_CCATTGTG	6151	1_day_old
GAAATGCC_GTAAGGAG_GTCCTTCG_CCATTGTG	884	1_day_old
GAAATGCC_GTCGGACT_TAACGATT_TTACGCCG	1004	1_day_old
GAAATGCC_GTGTATCG_TAACGATT_GTCACGTC	431	1_day_old
GAAATGCC_TAACCAAG_TAACGATT_AATTCTAA	2056	1_day_old
GAAATGCC_TAAGTTAC_TAACGATT_CGGCGACA	323	1_day_old
GAAATGCC_TATCCTCT_GTCCTTCG_AATAACGT	1240	1_day_old
GAAATGCC_TATTTGCG_TAACGATT_CCATTGTG	428	1_day_old
GAAATGCC_TGATTGTT_AAGGAATC_AATAACGT	1874	1_day_old
GAAATGCC_TGCATACT_ATGTAGAC_CGGCGACA	817	1_day_old
GAAATGCC_TGGAAATC_AAGGAATC_CGGCGACA	1057	1_day_old
GACGCTCC_AACATGAT_GTCCTTCG_GTCACGTC	584	1_day_old
GACGCTCC_ACTGCATA_AAGGAATC_GTCACGTC	955	1_day_old
GACGCTCC_AGGTTGCC_GTCCTTCG_AATTCTAA	608	1_day_old
GACGCTCC_AGTCCGAG_AAGGAATC_CCATTGTG	945	1_day_old
GACGCTCC_ATGGTCAT_GTCCTTCG_CGGCGACA	146	1_day_old
GACGCTCC_CCCTTGGA_GTCCTTCG_GCGGTTAA	216	1_day_old
GACGCTCC_CGATAGGG_AAGGAATC_TGCGAAGT	113	1_day_old
GACGCTCC_CGATAGGG_TAACGATT_AATAACGT	248	1_day_old
GACGCTCC_GCATTAAG_TAACGATT_AATAACGT	1148	1_day_old
GACGCTCC_GGTGAAGG_AAGGAATC_TGCGAAGT	378	1_day_old
GACGCTCC_GGTGAAGG_AAGGAATC_TTACGCCG	655	1_day_old
GACGCTCC_GTAAGGAG_GTCCTTCG_AATAACGT	2002	1_day_old
GACGCTCC_GTGTATCG_GTCCTTCG_TTACGCCG	170	1_day_old
GACGCTCC_TAACCAAG_ATGTAGAC_AATTCTAA	741	1_day_old
GACGCTCC_TCAAGAGC_AAGGAATC_TTACGCCG	717	1_day_old
GACGCTCC_TGGGCGGT_ATGTAGAC_TTACGCCG	1382	1_day_old
GACGCTCC_TGTTCCTG_GTCCTTCG_CGGCGACA	341	1_day_old
GACGCTCC_TTGCCTAA_AAGGAATC_TTACGCCG	929	1_day_old
GACGCTCC_TTGCCTAA_GTCCTTCG_GCGGTTAA	806	1_day_old
GACTTAGT_AACATGAT_GTCCTTCG_GCGGTTAA	208	1_day_old
GACTTAGT_AAGGAGTA_AAGGAATC_GTCACGTC	514	1_day_old
GACTTAGT_AATCTACA_AAGGAATC_GTCACGTC	120	1_day_old
GACTTAGT_ACATTCGT_AAGGAATC_TGCGAAGT	1613	1_day_old
GACTTAGT_ACCGGCCC_TAACGATT_TGCGAAGT	200	1_day_old
GACTTAGT_ACGCGCAG_ATGTAGAC_CCATTGTG	156	1_day_old
GACTTAGT_ACGCGCAG_GTCCTTCG_CCATTGTG	622	1_day_old
GACTTAGT_ACTTGTTG_AAGGAATC_GTCACGTC	208	1_day_old
GACTTAGT_ACTTGTTG_GTCCTTCG_CGGCGACA	851	1_day_old
GACTTAGT_AGAGTAGA_ATGTAGAC_CCATTGTG	3042	1_day_old
GACTTAGT_AGTCCGAG_AAGGAATC_GTCACGTC	120	1_day_old
GACTTAGT_ATCCAGGA_TAACGATT_AATTCTAA	776	1_day_old
GACTTAGT_ATGGTCAT_AAGGAATC_GTCACGTC	454	1_day_old
GACTTAGT_ATTACCGT_ATGTAGAC_CCATTGTG	107	1_day_old
GACTTAGT_ATTGGGTC_AAGGAATC_GTCACGTC	985	1_day_old
GACTTAGT_CAGCAACG_GTCCTTCG_AATAACGT	2700	1_day_old
GACTTAGT_CCCTTGGA_ATGTAGAC_AATTCTAA	907	1_day_old
GACTTAGT_CCCTTGGA_GTCCTTCG_TTACGCCG	175	1_day_old
GACTTAGT_CCTGCGGG_AAGGAATC_GTCACGTC	792	1_day_old
GACTTAGT_CCTGCGGG_TAACGATT_AATTCTAA	1948	1_day_old
GACTTAGT_CCTTATGT_ATGTAGAC_TTACGCCG	1139	1_day_old
GACTTAGT_CGATAGGG_AAGGAATC_AATTCTAA	206	1_day_old
GACTTAGT_CGATAGGG_AAGGAATC_GTCACGTC	150	1_day_old
GACTTAGT_CGATAGGG_ATGTAGAC_CCATTGTG	137	1_day_old
GACTTAGT_CGATAGGG_ATGTAGAC_CGGCGACA	530	1_day_old
GACTTAGT_CTAAGCCT_ATGTAGAC_TGCGAAGT	625	1_day_old
GACTTAGT_GAACTCGA_AAGGAATC_AATTCTAA	8996	1_day_old
GACTTAGT_GAGACGTG_AAGGAATC_GTCACGTC	1982	1_day_old
GACTTAGT_GAGACGTG_ATGTAGAC_AATAACGT	2420	1_day_old
GACTTAGT_GAGACGTG_TAACGATT_AATAACGT	3154	1_day_old
GACTTAGT_GAGACGTG_TAACGATT_GTCACGTC	683	1_day_old
GACTTAGT_GATTCCCA_AAGGAATC_GTCACGTC	640	1_day_old
GACTTAGT_GATTCCCA_ATGTAGAC_CCATTGTG	466	1_day_old
GACTTAGT_GCAGCCTC_TAACGATT_TGCGAAGT	437	1_day_old
GACTTAGT_GCATTAAG_ATGTAGAC_AATTCTAA	2131	1_day_old
GACTTAGT_GCATTAAG_TAACGATT_AATTCTAA	1041	1_day_old
GACTTAGT_GGCACGGA_ATGTAGAC_AATTCTAA	1312	1_day_old
GACTTAGT_GGGCTTGG_GTCCTTCG_AATAACGT	7025	1_day_old
GACTTAGT_GGTGAAGG_ATGTAGAC_GTCACGTC	313	1_day_old
GACTTAGT_GTGTATCG_AAGGAATC_GTCACGTC	416	1_day_old
GACTTAGT_GTGTATCG_TAACGATT_GTCACGTC	1059	1_day_old
GACTTAGT_TAACCAAG_TAACGATT_AATTCTAA	4361	1_day_old
GACTTAGT_TAAGTTAC_ATGTAGAC_GCGGTTAA	977	1_day_old
GACTTAGT_TACTGACC_GTCCTTCG_GCGGTTAA	2761	1_day_old
GACTTAGT_TATCCTCT_AAGGAATC_GTCACGTC	322	1_day_old
GACTTAGT_TCAAGAGC_TAACGATT_AATTCTAA	520	1_day_old
GACTTAGT_TCACATGG_AAGGAATC_GTCACGTC	248	1_day_old
GACTTAGT_TCCATCAA_AAGGAATC_GTCACGTC	102	1_day_old
GACTTAGT_TCCATCAA_TAACGATT_CCATTGTG	687	1_day_old
GACTTAGT_TGATGAAA_AAGGAATC_GTCACGTC	392	1_day_old
GACTTAGT_TGATTGTT_GTCCTTCG_CCATTGTG	1421	1_day_old
GACTTAGT_TTAACTTG_ATGTAGAC_TTACGCCG	1155	1_day_old
GACTTAGT_TTCGTGCA_AAGGAATC_CCATTGTG	1035	1_day_old
GATCCAAA_AATCTACA_GTCCTTCG_AATTCTAA	2867	1_day_old
GATCCAAA_ACATTCGT_TAACGATT_GTCACGTC	888	1_day_old
GATCCAAA_ACCGGCCC_TAACGATT_TTACGCCG	1538	1_day_old
GATCCAAA_ATCGAATG_TAACGATT_GTCACGTC	1124	1_day_old
GATCCAAA_ATTGGGTC_AAGGAATC_CCATTGTG	2494	1_day_old
GATCCAAA_CCTTATGT_AAGGAATC_CCATTGTG	1194	1_day_old
GATCCAAA_CGCCAGAT_ATGTAGAC_AATAACGT	2810	1_day_old
GATCCAAA_CGCCAGAT_TAACGATT_CCATTGTG	646	1_day_old
GATCCAAA_GAACTCGA_ATGTAGAC_AATAACGT	140	1_day_old
GATCCAAA_GATTCCCA_TAACGATT_GCGGTTAA	864	1_day_old
GATCCAAA_GCAGCCTC_TAACGATT_TTACGCCG	3046	1_day_old
GATCCAAA_GCATTAAG_ATGTAGAC_CCATTGTG	947	1_day_old
GATCCAAA_GCCCACGT_AAGGAATC_CCATTGTG	110	1_day_old
GATCCAAA_GGCACGGA_ATGTAGAC_GTCACGTC	1648	1_day_old
GATCCAAA_GGGCTTGG_TAACGATT_CCATTGTG	938	1_day_old
GATCCAAA_GTAAGGAG_GTCCTTCG_GCGGTTAA	1202	1_day_old
GATCCAAA_TAACCAAG_ATGTAGAC_TGCGAAGT	2353	1_day_old
GATCCAAA_TAACCAAG_TAACGATT_CGGCGACA	587	1_day_old
GATCCAAA_TAAGTTAC_TAACGATT_AATTCTAA	603	1_day_old
GATCCAAA_TACTGACC_GTCCTTCG_TGCGAAGT	420	1_day_old
GATCCAAA_TCAAGAGC_AAGGAATC_CCATTGTG	1632	1_day_old
GATCCAAA_TCACATGG_ATGTAGAC_CGGCGACA	1207	1_day_old
GATCCAAA_TCACATGG_TAACGATT_AATTCTAA	1942	1_day_old
GATCCAAA_TCCGAGTT_ATGTAGAC_CCATTGTG	1939	1_day_old
GATCCAAA_TGATGAAA_TAACGATT_GCGGTTAA	506	1_day_old
GATCCAAA_TGTTCCTG_AAGGAATC_GTCACGTC	1839	1_day_old
GATCCAAA_TTCGTGCA_AAGGAATC_TGCGAAGT	771	1_day_old
GATCCAAA_TTCGTGCA_TAACGATT_CGGCGACA	869	1_day_old
GATCCAAA_TTGCCTAA_AAGGAATC_CGGCGACA	1419	1_day_old
GCGTTAAA_ACATTCGT_AAGGAATC_AATAACGT	1958	1_day_old
GCGTTAAA_ACATTCGT_AAGGAATC_CCATTGTG	1682	1_day_old
GCGTTAAA_ACTGCATA_AAGGAATC_CCATTGTG	3320	1_day_old
GCGTTAAA_ACTTAGAA_ATGTAGAC_GTCACGTC	2509	1_day_old
GCGTTAAA_ACTTGTTG_TAACGATT_CCATTGTG	1008	1_day_old
GCGTTAAA_AGAGTAGA_TAACGATT_TTACGCCG	1050	1_day_old
GCGTTAAA_CCCTTGGA_AAGGAATC_TTACGCCG	180	1_day_old
GCGTTAAA_CCCTTGGA_GTCCTTCG_TTACGCCG	327	1_day_old
GCGTTAAA_CGCCAGAT_ATGTAGAC_CGGCGACA	131	1_day_old
GCGTTAAA_CGTACCAA_AAGGAATC_TTACGCCG	1076	1_day_old
GCGTTAAA_CGTACCAA_GTCCTTCG_GCGGTTAA	3002	1_day_old
GCGTTAAA_CGTAGACC_AAGGAATC_GCGGTTAA	625	1_day_old
GCGTTAAA_CTCTCTAT_ATGTAGAC_GCGGTTAA	1027	1_day_old
GCGTTAAA_GCATTAAG_AAGGAATC_GCGGTTAA	1891	1_day_old
GCGTTAAA_GGGCTTGG_ATGTAGAC_GTCACGTC	588	1_day_old
GCGTTAAA_GGTTCAAT_AAGGAATC_AATTCTAA	522	1_day_old
GCGTTAAA_GTAAGGAG_GTCCTTCG_TGCGAAGT	501	1_day_old
GCGTTAAA_TACTGACC_GTCCTTCG_TTACGCCG	2049	1_day_old
GCGTTAAA_TCAAGAGC_AAGGAATC_AATAACGT	1190	1_day_old
GCGTTAAA_TCCATCAA_GTCCTTCG_AATTCTAA	1741	1_day_old
GCGTTAAA_TCCGAGTT_AAGGAATC_AATAACGT	2196	1_day_old
GCGTTAAA_TCCGAGTT_GTCCTTCG_TGCGAAGT	613	1_day_old
GCGTTAAA_TGATTGTT_TAACGATT_TTACGCCG	981	1_day_old
GCGTTAAA_TTAACTTG_TAACGATT_AATAACGT	1498	1_day_old
GCTACGCT_AACATGAT_GTCCTTCG_AATAACGT	1368	1_day_old
GCTACGCT_AATCTACA_AAGGAATC_CCATTGTG	101	1_day_old
GCTACGCT_ACATTCGT_GTCCTTCG_AATTCTAA	941	1_day_old
GCTACGCT_ACCGGCCC_ATGTAGAC_GTCACGTC	1257	1_day_old
GCTACGCT_ACTGCATA_AAGGAATC_GCGGTTAA	101	1_day_old
GCTACGCT_AGAGTAGA_ATGTAGAC_AATTCTAA	177	1_day_old
GCTACGCT_AGCCGTTC_AAGGAATC_CCATTGTG	784	1_day_old
GCTACGCT_AGGTTGCC_TAACGATT_CGGCGACA	160	1_day_old
GCTACGCT_ATCGAATG_ATGTAGAC_AATAACGT	3742	1_day_old
GCTACGCT_ATCGAATG_GTCCTTCG_CGGCGACA	158	1_day_old
GCTACGCT_CAGCAACG_ATGTAGAC_CGGCGACA	602	1_day_old
GCTACGCT_CGCCAGAT_ATGTAGAC_GCGGTTAA	223	1_day_old
GCTACGCT_CGTACCAA_GTCCTTCG_GCGGTTAA	104	1_day_old
GCTACGCT_CGTACCAA_TAACGATT_AATTCTAA	852	1_day_old
GCTACGCT_CTTTAACA_AAGGAATC_AATAACGT	1751	1_day_old
GCTACGCT_GATTCCCA_AAGGAATC_CCATTGTG	114	1_day_old
GCTACGCT_GCAAATTT_TAACGATT_AATAACGT	1582	1_day_old
GCTACGCT_GCAGCCTC_AAGGAATC_CGGCGACA	520	1_day_old
GCTACGCT_GCAGCCTC_ATGTAGAC_TTACGCCG	118	1_day_old
GCTACGCT_GCATTAAG_AAGGAATC_TGCGAAGT	356	1_day_old
GCTACGCT_GGGCTTGG_GTCCTTCG_CGGCGACA	544	1_day_old
GCTACGCT_GTAAGGAG_ATGTAGAC_AATAACGT	1450	1_day_old
GCTACGCT_GTCGGACT_GTCCTTCG_CGGCGACA	1495	1_day_old
GCTACGCT_TAACCAAG_AAGGAATC_CCATTGTG	2730	1_day_old
GCTACGCT_TCACATGG_AAGGAATC_CGGCGACA	413	1_day_old
GCTACGCT_TGGGCGGT_GTCCTTCG_AATAACGT	686	1_day_old
GCTACGCT_TGTTCCTG_GTCCTTCG_GCGGTTAA	133	1_day_old
GCTACGCT_TTCGTGCA_GTCCTTCG_CGGCGACA	3375	1_day_old
GCTACGCT_TTGCCTAA_AAGGAATC_GTCACGTC	2896	1_day_old
GCTACGCT_TTTCTAGC_GTCCTTCG_TGCGAAGT	575	1_day_old
GGACTCCT_AACATGAT_TAACGATT_CGGCGACA	445	1_day_old
GGACTCCT_AATCTACA_AAGGAATC_AATTCTAA	315	1_day_old
GGACTCCT_ACTTAGAA_ATGTAGAC_TGCGAAGT	195	1_day_old
GGACTCCT_AGCCGTTC_AAGGAATC_TTACGCCG	184	1_day_old
GGACTCCT_AGGTTGCC_AAGGAATC_GTCACGTC	222	1_day_old
GGACTCCT_AGTCCGAG_ATGTAGAC_CCATTGTG	264	1_day_old
GGACTCCT_ATGGTCAT_ATGTAGAC_TGCGAAGT	192	1_day_old
GGACTCCT_ATGGTCAT_GTCCTTCG_GTCACGTC	639	1_day_old
GGACTCCT_CCCTTGGA_ATGTAGAC_CGGCGACA	284	1_day_old
GGACTCCT_CGTACCAA_GTCCTTCG_AATTCTAA	405	1_day_old
GGACTCCT_GAGACGTG_GTCCTTCG_AATAACGT	2304	1_day_old
GGACTCCT_GCATTAAG_AAGGAATC_AATTCTAA	378	1_day_old
GGACTCCT_GCATTAAG_TAACGATT_TTACGCCG	2743	1_day_old
GGACTCCT_GGGCTTGG_GTCCTTCG_CGGCGACA	140	1_day_old
GGACTCCT_GGTTCAAT_TAACGATT_CGGCGACA	180	1_day_old
GGACTCCT_TAACCAAG_GTCCTTCG_GCGGTTAA	477	1_day_old
GGACTCCT_TACTGACC_AAGGAATC_TGCGAAGT	445	1_day_old
GGACTCCT_TATCCTCT_GTCCTTCG_CGGCGACA	617	1_day_old
GGACTCCT_TGATGAAA_ATGTAGAC_CCATTGTG	811	1_day_old
GGACTCCT_TTGCCTAA_AAGGAATC_AATAACGT	2519	1_day_old
GGACTCCT_TTTCTAGC_TAACGATT_TTACGCCG	765	1_day_old
GGAGTAAG_ACGCGCAG_AAGGAATC_CGGCGACA	1149	1_day_old
GGAGTAAG_AGGTTGCC_AAGGAATC_GCGGTTAA	1250	1_day_old
GGAGTAAG_ATGGTCAT_ATGTAGAC_AATAACGT	104	1_day_old
GGAGTAAG_ATTACCGT_GTCCTTCG_AATTCTAA	1136	1_day_old
GGAGTAAG_ATTGGGTC_TAACGATT_GTCACGTC	639	1_day_old
GGAGTAAG_GCAAATTT_GTCCTTCG_TGCGAAGT	1141	1_day_old
GGAGTAAG_GCATTAAG_AAGGAATC_CCATTGTG	913	1_day_old
GGAGTAAG_GGTGAAGG_AAGGAATC_TTACGCCG	109	1_day_old
GGAGTAAG_TATTTGCG_AAGGAATC_GTCACGTC	1141	1_day_old
GGAGTAAG_TCCGAGTT_ATGTAGAC_AATAACGT	1789	1_day_old
GGAGTAAG_TGATGAAA_TAACGATT_AATTCTAA	811	1_day_old
GGAGTAAG_TGTTCCTG_TAACGATT_CGGCGACA	1585	1_day_old
GGAGTAAG_TTCGTGCA_AAGGAATC_GCGGTTAA	3648	1_day_old
GGAGTAAG_TTTCTAGC_AAGGAATC_GCGGTTAA	4191	1_day_old
GGAGTAAG_TTTCTAGC_GTCCTTCG_AATTCTAA	3060	1_day_old
GGCGTCGA_AACATGAT_GTCCTTCG_AATAACGT	2239	1_day_old
GGCGTCGA_ACATTCGT_ATGTAGAC_CGGCGACA	1051	1_day_old
GGCGTCGA_ACCGGCCC_GTCCTTCG_TTACGCCG	2351	1_day_old
GGCGTCGA_ACCGGCCC_TAACGATT_GTCACGTC	1658	1_day_old
GGCGTCGA_ACTGCATA_GTCCTTCG_TTACGCCG	2111	1_day_old
GGCGTCGA_AGAGATCT_AAGGAATC_TTACGCCG	150	1_day_old
GGCGTCGA_AGAGATCT_GTCCTTCG_GCGGTTAA	1555	1_day_old
GGCGTCGA_AGAGTAGA_ATGTAGAC_CCATTGTG	624	1_day_old
GGCGTCGA_AGCCGTTC_AAGGAATC_AATAACGT	501	1_day_old
GGCGTCGA_AGGTTGCC_ATGTAGAC_TGCGAAGT	502	1_day_old
GGCGTCGA_AGTCCGAG_AAGGAATC_TTACGCCG	722	1_day_old
GGCGTCGA_ATCGAATG_GTCCTTCG_GCGGTTAA	1230	1_day_old
GGCGTCGA_CAGCAACG_AAGGAATC_TTACGCCG	107	1_day_old
GGCGTCGA_CCTTATGT_AAGGAATC_GCGGTTAA	1249	1_day_old
GGCGTCGA_CCTTATGT_GTCCTTCG_CGGCGACA	2103	1_day_old
GGCGTCGA_CGATAGGG_GTCCTTCG_TTACGCCG	779	1_day_old
GGCGTCGA_CGGACTGC_AAGGAATC_TTACGCCG	1620	1_day_old
GGCGTCGA_CTAAGCCT_ATGTAGAC_AATTCTAA	1196	1_day_old
GGCGTCGA_CTCTCTAT_TAACGATT_GCGGTTAA	720	1_day_old
GGCGTCGA_GAACTCGA_GTCCTTCG_GCGGTTAA	1290	1_day_old
GGCGTCGA_GCAAATTT_AAGGAATC_AATAACGT	771	1_day_old
GGCGTCGA_GCCCACGT_TAACGATT_TGCGAAGT	110	1_day_old
GGCGTCGA_GGCACGGA_GTCCTTCG_AATTCTAA	1664	1_day_old
GGCGTCGA_GGGCTTGG_GTCCTTCG_AATTCTAA	1867	1_day_old
GGCGTCGA_GGTGAAGG_AAGGAATC_GCGGTTAA	122	1_day_old
GGCGTCGA_TAGATCGC_GTCCTTCG_TTACGCCG	1092	1_day_old
GGCGTCGA_TATCCTCT_TAACGATT_CGGCGACA	473	1_day_old
GGCGTCGA_TCAAGAGC_TAACGATT_CCATTGTG	566	1_day_old
GGCGTCGA_TCACATGG_GTCCTTCG_TGCGAAGT	442	1_day_old
GGCGTCGA_TCTGGCGA_GTCCTTCG_CGGCGACA	1014	1_day_old
GGCGTCGA_TTAACTTG_GTCCTTCG_AATTCTAA	4495	1_day_old
GGCGTCGA_TTCGTGCA_GTCCTTCG_CCATTGTG	1325	1_day_old
GGCGTCGA_TTGCCTAA_AAGGAATC_TTACGCCG	1995	1_day_old
GGCGTCGA_TTTCTAGC_AAGGAATC_GTCACGTC	1527	1_day_old
GGGAATGA_ACCGGCCC_AAGGAATC_CCATTGTG	1325	1_day_old
GGGAATGA_ACGATAAC_AAGGAATC_GCGGTTAA	3561	1_day_old
GGGAATGA_ACTTGTTG_TAACGATT_GCGGTTAA	157	1_day_old
GGGAATGA_AGAGTAGA_AAGGAATC_CCATTGTG	1310	1_day_old
GGGAATGA_AGGTTGCC_TAACGATT_GTCACGTC	1482	1_day_old
GGGAATGA_ATTACCGT_ATGTAGAC_TGCGAAGT	812	1_day_old
GGGAATGA_ATTACCGT_GTCCTTCG_TGCGAAGT	1072	1_day_old
GGGAATGA_CCAGTTTA_AAGGAATC_GTCACGTC	139	1_day_old
GGGAATGA_CGATAGGG_ATGTAGAC_CCATTGTG	1126	1_day_old
GGGAATGA_CGCCAGAT_TAACGATT_CCATTGTG	874	1_day_old
GGGAATGA_CGGACTGC_GTCCTTCG_AATTCTAA	2348	1_day_old
GGGAATGA_CTCTCTAT_ATGTAGAC_AATAACGT	1983	1_day_old
GGGAATGA_GGTGAAGG_AAGGAATC_TTACGCCG	108	1_day_old
GGGAATGA_TACTGACC_AAGGAATC_TGCGAAGT	792	1_day_old
GGGAATGA_TCCGAGTT_ATGTAGAC_TGCGAAGT	893	1_day_old
GGGAATGA_TCCGAGTT_TAACGATT_AATAACGT	130	1_day_old
GGGAATGA_TCTGGCGA_GTCCTTCG_TTACGCCG	243	1_day_old
GGGAATGA_TGCATACT_GTCCTTCG_AATAACGT	1648	1_day_old
GGGAATGA_TGGGCGGT_ATGTAGAC_GCGGTTAA	1827	1_day_old
GGGAATGA_TTCGTGCA_ATGTAGAC_CCATTGTG	987	1_day_old
GGGAATGA_TTCGTGCA_TAACGATT_TTACGCCG	3801	1_day_old
GGTAAACC_AATCTACA_TAACGATT_GCGGTTAA	738	1_day_old
GGTAAACC_ACGCGCAG_ATGTAGAC_CCATTGTG	951	1_day_old
GGTAAACC_ACGCGCAG_GTCCTTCG_CCATTGTG	593	1_day_old
GGTAAACC_ACTTAGAA_TAACGATT_CGGCGACA	689	1_day_old
GGTAAACC_ATCGAATG_TAACGATT_GCGGTTAA	892	1_day_old
GGTAAACC_CCCTTGGA_GTCCTTCG_TTACGCCG	157	1_day_old
GGTAAACC_CCTTATGT_AAGGAATC_AATAACGT	1664	1_day_old
GGTAAACC_CGATAGGG_ATGTAGAC_CGGCGACA	456	1_day_old
GGTAAACC_CGCCAGAT_TAACGATT_TTACGCCG	1404	1_day_old
GGTAAACC_CGTAGACC_AAGGAATC_TTACGCCG	1404	1_day_old
GGTAAACC_CTAGAAGT_GTCCTTCG_TTACGCCG	1990	1_day_old
GGTAAACC_GATCATTC_TAACGATT_GCGGTTAA	791	1_day_old
GGTAAACC_GCAAATTT_ATGTAGAC_TGCGAAGT	807	1_day_old
GGTAAACC_GCAGCCTC_TAACGATT_CGGCGACA	506	1_day_old
GGTAAACC_GCATTAAG_ATGTAGAC_CGGCGACA	3221	1_day_old
GGTAAACC_GCATTAAG_GTCCTTCG_GTCACGTC	1994	1_day_old
GGTAAACC_GGCACGGA_TAACGATT_AATTCTAA	579	1_day_old
GGTAAACC_GGGCTTGG_AAGGAATC_TGCGAAGT	1607	1_day_old
GGTAAACC_GGTGAAGG_ATGTAGAC_AATTCTAA	1045	1_day_old
GGTAAACC_GGTTCAAT_TAACGATT_CGGCGACA	541	1_day_old
GGTAAACC_GTGTATCG_GTCCTTCG_GCGGTTAA	1713	1_day_old
GGTAAACC_TAACCAAG_TAACGATT_CGGCGACA	1332	1_day_old
GGTAAACC_TAAGTTAC_ATGTAGAC_TTACGCCG	1683	1_day_old
GGTAAACC_TACTGACC_TAACGATT_AATAACGT	1418	1_day_old
GGTAAACC_TATCCTCT_AAGGAATC_CCATTGTG	849	1_day_old
GGTAAACC_TGATGAAA_GTCCTTCG_TTACGCCG	1900	1_day_old
GGTAAACC_TGATGAAA_TAACGATT_AATTCTAA	939	1_day_old
GGTAAACC_TGCATACT_AAGGAATC_TGCGAAGT	876	1_day_old
GGTAAACC_TTCGTGCA_TAACGATT_AATAACGT	795	1_day_old
GGTCATTT_ACATTCGT_ATGTAGAC_CGGCGACA	1356	1_day_old
GGTCATTT_ACGCGCAG_GTCCTTCG_CCATTGTG	660	1_day_old
GGTCATTT_ACTGCATA_GTCCTTCG_TGCGAAGT	280	1_day_old
GGTCATTT_AGAGTAGA_ATGTAGAC_AATTCTAA	493	1_day_old
GGTCATTT_ATCCAGGA_AAGGAATC_TTACGCCG	104	1_day_old
GGTCATTT_ATGGTCAT_ATGTAGAC_TTACGCCG	1759	1_day_old
GGTCATTT_ATTACCGT_GTCCTTCG_AATTCTAA	2640	1_day_old
GGTCATTT_ATTACCGT_GTCCTTCG_GTCACGTC	5684	1_day_old
GGTCATTT_ATTGGGTC_TAACGATT_AATTCTAA	1309	1_day_old
GGTCATTT_CCCTTGGA_GTCCTTCG_TTACGCCG	148	1_day_old
GGTCATTT_CCTGCGGG_AAGGAATC_TTACGCCG	121	1_day_old
GGTCATTT_CGATAGGG_AAGGAATC_AATTCTAA	236	1_day_old
GGTCATTT_CGATAGGG_ATGTAGAC_CGGCGACA	547	1_day_old
GGTCATTT_CGGACTGC_GTCCTTCG_AATAACGT	2336	1_day_old
GGTCATTT_GAACTCGA_TAACGATT_AATTCTAA	1329	1_day_old
GGTCATTT_GAGACGTG_ATGTAGAC_CCATTGTG	821	1_day_old
GGTCATTT_GATCATTC_AAGGAATC_AATTCTAA	2211	1_day_old
GGTCATTT_GATTCCCA_AAGGAATC_TTACGCCG	5417	1_day_old
GGTCATTT_GGGCTTGG_TAACGATT_TTACGCCG	3185	1_day_old
GGTCATTT_GTAAGGAG_TAACGATT_CGGCGACA	531	1_day_old
GGTCATTT_GTGTATCG_ATGTAGAC_GTCACGTC	1166	1_day_old
GGTCATTT_TAAGTTAC_GTCCTTCG_TTACGCCG	2784	1_day_old
GGTCATTT_TCCGAGTT_GTCCTTCG_TTACGCCG	5024	1_day_old
GGTCATTT_TCTGGCGA_AAGGAATC_GCGGTTAA	467	1_day_old
GGTCATTT_TGATGAAA_ATGTAGAC_AATAACGT	1487	1_day_old
GGTCATTT_TGGGCGGT_ATGTAGAC_GCGGTTAA	3738	1_day_old
GGTCATTT_TGTTCCTG_GTCCTTCG_AATAACGT	2106	1_day_old
GGTCATTT_TTAACTTG_GTCCTTCG_GCGGTTAA	903	1_day_old
GGTCATTT_TTCGTGCA_GTCCTTCG_TTACGCCG	1497	1_day_old
GGTCATTT_TTCGTGCA_TAACGATT_CGGCGACA	378	1_day_old
GTAGAGGA_AACATGAT_GTCCTTCG_AATTCTAA	224	1_day_old
GTAGAGGA_AATCTACA_TAACGATT_AATTCTAA	1081	1_day_old
GTAGAGGA_ACATTCGT_TAACGATT_AATTCTAA	129	1_day_old
GTAGAGGA_ACCGGCCC_AAGGAATC_AATAACGT	391	1_day_old
GTAGAGGA_ACGATAAC_AAGGAATC_AATAACGT	3123	1_day_old
GTAGAGGA_ACGATAAC_AAGGAATC_TGCGAAGT	3200	1_day_old
GTAGAGGA_ACTTAGAA_GTCCTTCG_TTACGCCG	2948	1_day_old
GTAGAGGA_ATCGAATG_GTCCTTCG_GCGGTTAA	1457	1_day_old
GTAGAGGA_ATTACCGT_GTCCTTCG_TTACGCCG	1902	1_day_old
GTAGAGGA_CCCTTGGA_TAACGATT_GTCACGTC	2368	1_day_old
GTAGAGGA_CCTTATGT_AAGGAATC_GTCACGTC	2852	1_day_old
GTAGAGGA_CCTTATGT_ATGTAGAC_TGCGAAGT	552	1_day_old
GTAGAGGA_CGTACCAA_GTCCTTCG_AATAACGT	188	1_day_old
GTAGAGGA_CGTACCAA_GTCCTTCG_TGCGAAGT	1062	1_day_old
GTAGAGGA_GACGTGGC_GTCCTTCG_GCGGTTAA	2117	1_day_old
GTAGAGGA_GAGACGTG_AAGGAATC_TTACGCCG	1571	1_day_old
GTAGAGGA_GCAAATTT_TAACGATT_AATAACGT	6101	1_day_old
GTAGAGGA_GCATTAAG_GTCCTTCG_AATTCTAA	1813	1_day_old
GTAGAGGA_GCATTAAG_TAACGATT_TGCGAAGT	161	1_day_old
GTAGAGGA_GGTGAAGG_AAGGAATC_TTACGCCG	441	1_day_old
GTAGAGGA_GTCGGACT_GTCCTTCG_AATTCTAA	142	1_day_old
GTAGAGGA_GTGTATCG_ATGTAGAC_CGGCGACA	953	1_day_old
GTAGAGGA_TAACCAAG_ATGTAGAC_GTCACGTC	244	1_day_old
GTAGAGGA_TAACCAAG_GTCCTTCG_GCGGTTAA	231	1_day_old
GTAGAGGA_TAAGTTAC_TAACGATT_GTCACGTC	774	1_day_old
GTAGAGGA_TACTGACC_TAACGATT_AATTCTAA	215	1_day_old
GTAGAGGA_TAGATCGC_AAGGAATC_GTCACGTC	1229	1_day_old
GTAGAGGA_TGATGAAA_AAGGAATC_TGCGAAGT	124	1_day_old
GTAGAGGA_TGGGCGGT_GTCCTTCG_AATAACGT	1648	1_day_old
GTAGAGGA_TTAACTTG_GTCCTTCG_TTACGCCG	1782	1_day_old
GTAGAGGA_TTGCCTAA_AAGGAATC_TTACGCCG	1340	1_day_old
GTAGAGGA_TTTCTAGC_AAGGAATC_AATAACGT	106	1_day_old
GTATTCGG_ACTTGTTG_TAACGATT_CGGCGACA	308	1_day_old
GTATTCGG_AGGTTGCC_AAGGAATC_AATTCTAA	1642	1_day_old
GTATTCGG_CCTGCGGG_AAGGAATC_TTACGCCG	276	1_day_old
GTATTCGG_CCTGCGGG_TAACGATT_CGGCGACA	317	1_day_old
GTATTCGG_CCTTATGT_AAGGAATC_TTACGCCG	1062	1_day_old
GTATTCGG_CTAAGCCT_GTCCTTCG_GTCACGTC	1757	1_day_old
GTATTCGG_GACGTGGC_AAGGAATC_AATAACGT	605	1_day_old
GTATTCGG_GATTCCCA_TAACGATT_CGGCGACA	158	1_day_old
GTATTCGG_GATTCCCA_TAACGATT_TTACGCCG	577	1_day_old
GTATTCGG_GCAAATTT_GTCCTTCG_GTCACGTC	2824	1_day_old
GTATTCGG_GCAAATTT_GTCCTTCG_TGCGAAGT	766	1_day_old
GTATTCGG_GGTTCAAT_TAACGATT_AATAACGT	1644	1_day_old
GTATTCGG_GTCGGACT_TAACGATT_AATAACGT	270	1_day_old
GTATTCGG_GTGTATCG_AAGGAATC_TTACGCCG	460	1_day_old
GTATTCGG_GTGTATCG_TAACGATT_CGGCGACA	899	1_day_old
GTATTCGG_TAGATCGC_AAGGAATC_GCGGTTAA	1409	1_day_old
GTATTCGG_TAGATCGC_GTCCTTCG_TTACGCCG	1397	1_day_old
GTATTCGG_TCAAGAGC_TAACGATT_AATAACGT	291	1_day_old
GTATTCGG_TCCATCAA_ATGTAGAC_AATAACGT	266	1_day_old
GTATTCGG_TCCATCAA_GTCCTTCG_CGGCGACA	199	1_day_old
GTATTCGG_TGATGAAA_AAGGAATC_AATTCTAA	115	1_day_old
GTATTCGG_TGCATACT_AAGGAATC_AATTCTAA	1110	1_day_old
GTATTCGG_TGCATACT_GTCCTTCG_TGCGAAGT	716	1_day_old
GTATTCGG_TGCATACT_TAACGATT_CGGCGACA	468	1_day_old
GTGATAGC_AAGGAGTA_AAGGAATC_CCATTGTG	188	1_day_old
GTGATAGC_AAGGAGTA_TAACGATT_GTCACGTC	484	1_day_old
GTGATAGC_ACATTCGT_ATGTAGAC_AATAACGT	486	1_day_old
GTGATAGC_ACATTCGT_TAACGATT_CGGCGACA	1042	1_day_old
GTGATAGC_ACTTGTTG_TAACGATT_GCGGTTAA	111	1_day_old
GTGATAGC_AGCCGTTC_TAACGATT_GTCACGTC	598	1_day_old
GTGATAGC_ATCCAGGA_GTCCTTCG_GCGGTTAA	1132	1_day_old
GTGATAGC_ATTGGGTC_GTCCTTCG_GTCACGTC	1421	1_day_old
GTGATAGC_CAGCAACG_AAGGAATC_TGCGAAGT	542	1_day_old
GTGATAGC_CGCCAGAT_ATGTAGAC_GCGGTTAA	1074	1_day_old
GTGATAGC_CGTACCAA_TAACGATT_AATAACGT	1365	1_day_old
GTGATAGC_CTAAGCCT_AAGGAATC_CGGCGACA	109	1_day_old
GTGATAGC_CTAAGCCT_TAACGATT_GTCACGTC	107	1_day_old
GTGATAGC_GAACTCGA_TAACGATT_CCATTGTG	920	1_day_old
GTGATAGC_GACGTGGC_AAGGAATC_AATTCTAA	2440	1_day_old
GTGATAGC_GATTCCCA_ATGTAGAC_AATAACGT	2395	1_day_old
GTGATAGC_GGGCTTGG_GTCCTTCG_GCGGTTAA	3793	1_day_old
GTGATAGC_GGGCTTGG_GTCCTTCG_GTCACGTC	1351	1_day_old
GTGATAGC_GGTGAAGG_AAGGAATC_TTACGCCG	460	1_day_old
GTGATAGC_GTGTATCG_ATGTAGAC_CGGCGACA	559	1_day_old
GTGATAGC_TATCCTCT_TAACGATT_AATAACGT	917	1_day_old
GTGATAGC_TCAAGAGC_ATGTAGAC_AATTCTAA	1326	1_day_old
GTGATAGC_TCCGAGTT_TAACGATT_GTCACGTC	569	1_day_old
GTGATAGC_TCTGGCGA_AAGGAATC_GTCACGTC	739	1_day_old
GTGATAGC_TCTGGCGA_GTCCTTCG_GCGGTTAA	1277	1_day_old
GTGATAGC_TGATGAAA_ATGTAGAC_CCATTGTG	864	1_day_old
GTGATAGC_TGCATACT_AAGGAATC_TGCGAAGT	497	1_day_old
GTGTGGTG_AAGGAGTA_GTCCTTCG_TGCGAAGT	620	1_day_old
GTGTGGTG_AATCTACA_AAGGAATC_AATAACGT	3547	1_day_old
GTGTGGTG_ACTTGTTG_ATGTAGAC_GCGGTTAA	1987	1_day_old
GTGTGGTG_AGCCGTTC_GTCCTTCG_AATAACGT	527	1_day_old
GTGTGGTG_ATCCAGGA_TAACGATT_AATTCTAA	835	1_day_old
GTGTGGTG_ATGGTCAT_AAGGAATC_CGGCGACA	1380	1_day_old
GTGTGGTG_CAGCAACG_ATGTAGAC_CGGCGACA	850	1_day_old
GTGTGGTG_CCAGTTTA_ATGTAGAC_AATTCTAA	730	1_day_old
GTGTGGTG_CCTTATGT_GTCCTTCG_AATAACGT	1594	1_day_old
GTGTGGTG_CCTTATGT_TAACGATT_CCATTGTG	485	1_day_old
GTGTGGTG_CGATAGGG_TAACGATT_CGGCGACA	496	1_day_old
GTGTGGTG_CGGACTGC_GTCCTTCG_CCATTGTG	943	1_day_old
GTGTGGTG_CTAGAAGT_GTCCTTCG_CGGCGACA	2024	1_day_old
GTGTGGTG_GAACTCGA_AAGGAATC_GTCACGTC	3451	1_day_old
GTGTGGTG_GACGTGGC_AAGGAATC_TGCGAAGT	742	1_day_old
GTGTGGTG_GACGTGGC_ATGTAGAC_TTACGCCG	942	1_day_old
GTGTGGTG_GCAAATTT_TAACGATT_AATAACGT	1162	1_day_old
GTGTGGTG_GCAAATTT_TAACGATT_TGCGAAGT	177	1_day_old
GTGTGGTG_GCAGCCTC_AAGGAATC_GTCACGTC	2032	1_day_old
GTGTGGTG_GGGCTTGG_GTCCTTCG_AATTCTAA	1090	1_day_old
GTGTGGTG_GGTTCAAT_GTCCTTCG_TGCGAAGT	526	1_day_old
GTGTGGTG_GTGTATCG_TAACGATT_CCATTGTG	680	1_day_old
GTGTGGTG_TAAGTTAC_AAGGAATC_TTACGCCG	1054	1_day_old
GTGTGGTG_TACTGACC_AAGGAATC_AATAACGT	1961	1_day_old
GTGTGGTG_TACTGACC_ATGTAGAC_AATTCTAA	1937	1_day_old
GTGTGGTG_TCTGGCGA_GTCCTTCG_CGGCGACA	776	1_day_old
GTTAACAG_AACATGAT_GTCCTTCG_AATAACGT	120	1_day_old
GTTAACAG_AATCTACA_TAACGATT_AATAACGT	853	1_day_old
GTTAACAG_ACATTCGT_TAACGATT_AATTCTAA	643	1_day_old
GTTAACAG_ACGCGCAG_TAACGATT_GTCACGTC	533	1_day_old
GTTAACAG_ACTTGTTG_ATGTAGAC_TTACGCCG	2738	1_day_old
GTTAACAG_AGCCGTTC_TAACGATT_TTACGCCG	1291	1_day_old
GTTAACAG_AGGTTGCC_ATGTAGAC_AATTCTAA	4738	1_day_old
GTTAACAG_AGGTTGCC_ATGTAGAC_GTCACGTC	1529	1_day_old
GTTAACAG_AGGTTGCC_TAACGATT_AATAACGT	1105	1_day_old
GTTAACAG_AGTCCGAG_AAGGAATC_TGCGAAGT	703	1_day_old
GTTAACAG_AGTCCGAG_AAGGAATC_TTACGCCG	475	1_day_old
GTTAACAG_AGTCCGAG_TAACGATT_AATTCTAA	1243	1_day_old
GTTAACAG_ATCGAATG_GTCCTTCG_AATAACGT	141	1_day_old
GTTAACAG_ATCGAATG_TAACGATT_CCATTGTG	117	1_day_old
GTTAACAG_ATTACCGT_AAGGAATC_TGCGAAGT	388	1_day_old
GTTAACAG_ATTACCGT_GTCCTTCG_AATAACGT	1316	1_day_old
GTTAACAG_CAGCAACG_ATGTAGAC_TTACGCCG	4225	1_day_old
GTTAACAG_CCAGTTTA_ATGTAGAC_TTACGCCG	1413	1_day_old
GTTAACAG_CCAGTTTA_GTCCTTCG_AATAACGT	2416	1_day_old
GTTAACAG_CGATAGGG_GTCCTTCG_TGCGAAGT	165	1_day_old
GTTAACAG_CTAAGCCT_GTCCTTCG_TTACGCCG	2201	1_day_old
GTTAACAG_CTAGAAGT_AAGGAATC_TTACGCCG	107	1_day_old
GTTAACAG_GAGACGTG_AAGGAATC_TGCGAAGT	633	1_day_old
GTTAACAG_GCAGCCTC_ATGTAGAC_GCGGTTAA	1052	1_day_old
GTTAACAG_GCATTAAG_GTCCTTCG_AATTCTAA	2914	1_day_old
GTTAACAG_GCATTAAG_TAACGATT_AATTCTAA	1212	1_day_old
GTTAACAG_GGGCTTGG_AAGGAATC_AATTCTAA	1153	1_day_old
GTTAACAG_GGTGAAGG_AAGGAATC_AATAACGT	1136	1_day_old
GTTAACAG_GGTGAAGG_AAGGAATC_CCATTGTG	1686	1_day_old
GTTAACAG_TGTTCCTG_GTCCTTCG_GCGGTTAA	4665	1_day_old
GTTAACAG_TTAACTTG_ATGTAGAC_TTACGCCG	2135	1_day_old
GTTAACAG_TTTCTAGC_TAACGATT_CGGCGACA	517	1_day_old
TAACAACA_AACATGAT_GTCCTTCG_GCGGTTAA	711	1_day_old
TAACAACA_AACATGAT_TAACGATT_TGCGAAGT	410	1_day_old
TAACAACA_AAGGAGTA_GTCCTTCG_TGCGAAGT	1171	1_day_old
TAACAACA_ACTGCATA_AAGGAATC_GCGGTTAA	101	1_day_old
TAACAACA_CCAGTTTA_ATGTAGAC_GTCACGTC	464	1_day_old
TAACAACA_CCAGTTTA_TAACGATT_CGGCGACA	225	1_day_old
TAACAACA_CCCTTGGA_ATGTAGAC_GTCACGTC	1608	1_day_old
TAACAACA_GATCATTC_AAGGAATC_CGGCGACA	1571	1_day_old
TAACAACA_GATCATTC_AAGGAATC_TTACGCCG	1555	1_day_old
TAACAACA_GCATTAAG_ATGTAGAC_TTACGCCG	820	1_day_old
TAACAACA_GGGCTTGG_TAACGATT_GTCACGTC	484	1_day_old
TAACAACA_GTGTATCG_AAGGAATC_GTCACGTC	290	1_day_old
TAACAACA_TAACCAAG_ATGTAGAC_AATAACGT	4050	1_day_old
TAACAACA_TAACCAAG_GTCCTTCG_GTCACGTC	1120	1_day_old
TAACAACA_TAACCAAG_TAACGATT_TGCGAAGT	501	1_day_old
TAACAACA_TAAGTTAC_AAGGAATC_AATTCTAA	1514	1_day_old
TAACAACA_TCCGAGTT_TAACGATT_GCGGTTAA	981	1_day_old
TAACAACA_TCTGGCGA_TAACGATT_TGCGAAGT	590	1_day_old
TAACAACA_TGATGAAA_GTCCTTCG_CGGCGACA	887	1_day_old
TAACAACA_TTAACTTG_AAGGAATC_CGGCGACA	409	1_day_old
TAACAACA_TTCGTGCA_AAGGAATC_GCGGTTAA	315	1_day_old
TAACAACA_TTCGTGCA_AAGGAATC_GTCACGTC	1543	1_day_old
TAACAACA_TTCGTGCA_AAGGAATC_TTACGCCG	1253	1_day_old
TAACAACA_TTCGTGCA_ATGTAGAC_GTCACGTC	3605	1_day_old
TAACAACA_TTGCCTAA_TAACGATT_AATAACGT	1161	1_day_old
TAAGGCGA_AATCTACA_AAGGAATC_TTACGCCG	1631	1_day_old
TAAGGCGA_AATCTACA_TAACGATT_GCGGTTAA	327	1_day_old
TAAGGCGA_ACCGGCCC_AAGGAATC_TTACGCCG	2199	1_day_old
TAAGGCGA_ACTTGTTG_AAGGAATC_TTACGCCG	1771	1_day_old
TAAGGCGA_ATCGAATG_AAGGAATC_AATAACGT	108	1_day_old
TAAGGCGA_ATCGAATG_ATGTAGAC_GTCACGTC	182	1_day_old
TAAGGCGA_ATCGAATG_TAACGATT_TTACGCCG	520	1_day_old
TAAGGCGA_CAGCAACG_GTCCTTCG_TTACGCCG	2442	1_day_old
TAAGGCGA_CCAGTTTA_ATGTAGAC_GCGGTTAA	113	1_day_old
TAAGGCGA_CCTGCGGG_TAACGATT_GCGGTTAA	309	1_day_old
TAAGGCGA_CGCCAGAT_AAGGAATC_CCATTGTG	1600	1_day_old
TAAGGCGA_CGCCAGAT_GTCCTTCG_CGGCGACA	1692	1_day_old
TAAGGCGA_CGGACTGC_GTCCTTCG_AATTCTAA	184	1_day_old
TAAGGCGA_GAACTCGA_GTCCTTCG_AATAACGT	194	1_day_old
TAAGGCGA_GATCATTC_ATGTAGAC_AATAACGT	154	1_day_old
TAAGGCGA_GCATTAAG_AAGGAATC_TGCGAAGT	1075	1_day_old
TAAGGCGA_GCATTAAG_ATGTAGAC_GCGGTTAA	923	1_day_old
TAAGGCGA_GCATTAAG_ATGTAGAC_TTACGCCG	1858	1_day_old
TAAGGCGA_GGGCTTGG_GTCCTTCG_CGGCGACA	1546	1_day_old
TAAGGCGA_GGTGAAGG_ATGTAGAC_CGGCGACA	1190	1_day_old
TAAGGCGA_GGTGAAGG_TAACGATT_AATAACGT	2241	1_day_old
TAAGGCGA_GTAAGGAG_TAACGATT_CCATTGTG	592	1_day_old
TAAGGCGA_GTCGGACT_GTCCTTCG_TGCGAAGT	516	1_day_old
TAAGGCGA_GTCGGACT_TAACGATT_GTCACGTC	173	1_day_old
TAAGGCGA_TACTGACC_AAGGAATC_CCATTGTG	855	1_day_old
TAAGGCGA_TACTGACC_ATGTAGAC_CGGCGACA	491	1_day_old
TAAGGCGA_TACTGACC_TAACGATT_TTACGCCG	1370	1_day_old
TAAGGCGA_TATCCTCT_GTCCTTCG_TTACGCCG	566	1_day_old
TAAGGCGA_TCCATCAA_ATGTAGAC_TGCGAAGT	138	1_day_old
TAAGGCGA_TCCGAGTT_GTCCTTCG_CCATTGTG	1020	1_day_old
TAAGGCGA_TGATGAAA_GTCCTTCG_AATTCTAA	157	1_day_old
TAAGGCGA_TGATTGTT_AAGGAATC_CCATTGTG	288	1_day_old
TAAGGCGA_TGGGCGGT_GTCCTTCG_TTACGCCG	1747	1_day_old
TAAGGCGA_TTTCTAGC_ATGTAGAC_TGCGAAGT	745	1_day_old
TACACCTC_AATCTACA_AAGGAATC_CGGCGACA	400	1_day_old
TACACCTC_AATCTACA_ATGTAGAC_AATTCTAA	224	1_day_old
TACACCTC_AATCTACA_GTCCTTCG_GCGGTTAA	1011	1_day_old
TACACCTC_AATCTACA_TAACGATT_CCATTGTG	317	1_day_old
TACACCTC_ACATTCGT_AAGGAATC_CCATTGTG	1243	1_day_old
TACACCTC_ACATTCGT_TAACGATT_GCGGTTAA	1298	1_day_old
TACACCTC_ACCGGCCC_ATGTAGAC_AATAACGT	175	1_day_old
TACACCTC_ACCGGCCC_GTCCTTCG_CGGCGACA	139	1_day_old
TACACCTC_AGAGTAGA_GTCCTTCG_GCGGTTAA	1508	1_day_old
TACACCTC_AGTCCGAG_TAACGATT_GTCACGTC	769	1_day_old
TACACCTC_ATCCAGGA_AAGGAATC_AATTCTAA	2159	1_day_old
TACACCTC_ATCCAGGA_GTCCTTCG_GCGGTTAA	103	1_day_old
TACACCTC_ATGGTCAT_GTCCTTCG_GCGGTTAA	101	1_day_old
TACACCTC_CCAGTTTA_TAACGATT_CGGCGACA	957	1_day_old
TACACCTC_CCTGCGGG_GTCCTTCG_GCGGTTAA	133	1_day_old
TACACCTC_CCTTATGT_AAGGAATC_GCGGTTAA	1275	1_day_old
TACACCTC_CGATAGGG_GTCCTTCG_GCGGTTAA	103	1_day_old
TACACCTC_CGCCAGAT_TAACGATT_TGCGAAGT	503	1_day_old
TACACCTC_CGGACTGC_TAACGATT_GCGGTTAA	638	1_day_old
TACACCTC_CGTAGACC_AAGGAATC_GTCACGTC	915	1_day_old
TACACCTC_CGTAGACC_ATGTAGAC_CGGCGACA	1386	1_day_old
TACACCTC_GAACTCGA_TAACGATT_AATAACGT	1909	1_day_old
TACACCTC_GACGTGGC_AAGGAATC_AATTCTAA	801	1_day_old
TACACCTC_GATTCCCA_GTCCTTCG_GTCACGTC	1100	1_day_old
TACACCTC_GCAAATTT_TAACGATT_TTACGCCG	936	1_day_old
TACACCTC_GCAGCCTC_ATGTAGAC_TTACGCCG	119	1_day_old
TACACCTC_GCAGCCTC_GTCCTTCG_CGGCGACA	1291	1_day_old
TACACCTC_GGTGAAGG_AAGGAATC_GTCACGTC	663	1_day_old
TACACCTC_GGTGAAGG_TAACGATT_TTACGCCG	1652	1_day_old
TACACCTC_GTGTATCG_GTCCTTCG_GCGGTTAA	160	1_day_old
TACACCTC_TAACCAAG_GTCCTTCG_AATAACGT	124	1_day_old
TACACCTC_TAGATCGC_ATGTAGAC_GCGGTTAA	1668	1_day_old
TACACCTC_TGGGCGGT_GTCCTTCG_CGGCGACA	1429	1_day_old
TACACCTC_TGTTCCTG_GTCCTTCG_GCGGTTAA	121	1_day_old
TACTTGAA_ACTGCATA_AAGGAATC_TTACGCCG	2683	1_day_old
TACTTGAA_ACTTGTTG_AAGGAATC_TGCGAAGT	1335	1_day_old
TACTTGAA_AGAGATCT_AAGGAATC_CCATTGTG	103	1_day_old
TACTTGAA_AGCCGTTC_AAGGAATC_TGCGAAGT	1138	1_day_old
TACTTGAA_AGTCCGAG_AAGGAATC_CCATTGTG	1251	1_day_old
TACTTGAA_ATCGAATG_TAACGATT_CCATTGTG	1391	1_day_old
TACTTGAA_ATGGTCAT_AAGGAATC_TTACGCCG	1647	1_day_old
TACTTGAA_ATTACCGT_AAGGAATC_AATAACGT	1119	1_day_old
TACTTGAA_CCCTTGGA_AAGGAATC_CGGCGACA	1117	1_day_old
TACTTGAA_CGATAGGG_AAGGAATC_CCATTGTG	2431	1_day_old
TACTTGAA_CGATAGGG_ATGTAGAC_AATAACGT	1896	1_day_old
TACTTGAA_CGCCAGAT_ATGTAGAC_CCATTGTG	1321	1_day_old
TACTTGAA_CGCCAGAT_TAACGATT_TGCGAAGT	737	1_day_old
TACTTGAA_CTAGAAGT_AAGGAATC_GCGGTTAA	1071	1_day_old
TACTTGAA_CTCTCTAT_ATGTAGAC_TGCGAAGT	609	1_day_old
TACTTGAA_GGTGAAGG_AAGGAATC_TTACGCCG	151	1_day_old
TACTTGAA_GGTGAAGG_GTCCTTCG_CCATTGTG	1169	1_day_old
TACTTGAA_GGTTCAAT_GTCCTTCG_AATTCTAA	2287	1_day_old
TACTTGAA_GGTTCAAT_TAACGATT_GCGGTTAA	616	1_day_old
TACTTGAA_GTAAGGAG_TAACGATT_AATAACGT	1519	1_day_old
TACTTGAA_GTCGGACT_AAGGAATC_GTCACGTC	1315	1_day_old
TACTTGAA_GTGTATCG_GTCCTTCG_GCGGTTAA	819	1_day_old
TACTTGAA_TCCGAGTT_AAGGAATC_AATTCTAA	1091	1_day_old
TACTTGAA_TCTGGCGA_AAGGAATC_CGGCGACA	1571	1_day_old
TACTTGAA_TGATTGTT_GTCCTTCG_AATAACGT	2912	1_day_old
TACTTGAA_TGCATACT_GTCCTTCG_CCATTGTG	1457	1_day_old
TACTTGAA_TGTTCCTG_TAACGATT_GCGGTTAA	1420	1_day_old
TACTTGAA_TTGCCTAA_GTCCTTCG_CGGCGACA	1175	1_day_old
TACTTGAA_TTGCCTAA_GTCCTTCG_GTCACGTC	2292	1_day_old
TACTTGAA_TTGCCTAA_GTCCTTCG_TGCGAAGT	1017	1_day_old
TAGGCATG_AAGGAGTA_GTCCTTCG_CCATTGTG	155	1_day_old
TAGGCATG_ACCGGCCC_AAGGAATC_CCATTGTG	622	1_day_old
TAGGCATG_ACGCGCAG_GTCCTTCG_TTACGCCG	613	1_day_old
TAGGCATG_ACTTAGAA_AAGGAATC_TTACGCCG	2149	1_day_old
TAGGCATG_AGAGTAGA_GTCCTTCG_GCGGTTAA	4801	1_day_old
TAGGCATG_ATGGTCAT_AAGGAATC_GCGGTTAA	327	1_day_old
TAGGCATG_CAGCAACG_GTCCTTCG_TTACGCCG	2628	1_day_old
TAGGCATG_CCAGTTTA_AAGGAATC_TTACGCCG	906	1_day_old
TAGGCATG_CCAGTTTA_GTCCTTCG_AATAACGT	154	1_day_old
TAGGCATG_CCTGCGGG_GTCCTTCG_AATAACGT	121	1_day_old
TAGGCATG_CGTACCAA_ATGTAGAC_AATAACGT	1997	1_day_old
TAGGCATG_CGTAGACC_GTCCTTCG_CCATTGTG	834	1_day_old
TAGGCATG_CTAGAAGT_AAGGAATC_TTACGCCG	351	1_day_old
TAGGCATG_CTTTAACA_TAACGATT_AATAACGT	608	1_day_old
TAGGCATG_GAACTCGA_GTCCTTCG_CCATTGTG	641	1_day_old
TAGGCATG_GATCATTC_AAGGAATC_CCATTGTG	149	1_day_old
TAGGCATG_GATCATTC_GTCCTTCG_AATAACGT	1036	1_day_old
TAGGCATG_GATTCCCA_AAGGAATC_TGCGAAGT	165	1_day_old
TAGGCATG_GGCACGGA_GTCCTTCG_TTACGCCG	1954	1_day_old
TAGGCATG_GGGCTTGG_GTCCTTCG_TTACGCCG	5999	1_day_old
TAGGCATG_GGTGAAGG_AAGGAATC_AATAACGT	1789	1_day_old
TAGGCATG_GGTGAAGG_AAGGAATC_GTCACGTC	1305	1_day_old
TAGGCATG_GGTGAAGG_ATGTAGAC_TGCGAAGT	905	1_day_old
TAGGCATG_GTGTATCG_ATGTAGAC_AATTCTAA	1443	1_day_old
TAGGCATG_GTGTATCG_ATGTAGAC_TGCGAAGT	335	1_day_old
TAGGCATG_GTGTATCG_GTCCTTCG_AATAACGT	123	1_day_old
TAGGCATG_TACTGACC_TAACGATT_TTACGCCG	690	1_day_old
TAGGCATG_TATCCTCT_ATGTAGAC_GCGGTTAA	692	1_day_old
TAGGCATG_TCCATCAA_AAGGAATC_CGGCGACA	3050	1_day_old
TAGGCATG_TCCGAGTT_TAACGATT_GCGGTTAA	121	1_day_old
TAGGCATG_TGTTCCTG_TAACGATT_CCATTGTG	1759	1_day_old
TAGGCATG_TTGCCTAA_GTCCTTCG_TGCGAAGT	899	1_day_old
TCAGCTAT_ACCGGCCC_ATGTAGAC_GTCACGTC	1115	1_day_old
TCAGCTAT_ACGATAAC_GTCCTTCG_TTACGCCG	2582	1_day_old
TCAGCTAT_ACGCGCAG_AAGGAATC_CGGCGACA	309	1_day_old
TCAGCTAT_ACTGCATA_TAACGATT_CGGCGACA	476	1_day_old
TCAGCTAT_ACTTAGAA_ATGTAGAC_CGGCGACA	1950	1_day_old
TCAGCTAT_ACTTAGAA_GTCCTTCG_GCGGTTAA	1572	1_day_old
TCAGCTAT_AGAGATCT_GTCCTTCG_TGCGAAGT	215	1_day_old
TCAGCTAT_AGCCGTTC_GTCCTTCG_GTCACGTC	176	1_day_old
TCAGCTAT_AGTCCGAG_GTCCTTCG_TGCGAAGT	2288	1_day_old
TCAGCTAT_ATCCAGGA_ATGTAGAC_CGGCGACA	3203	1_day_old
TCAGCTAT_ATCCAGGA_TAACGATT_AATAACGT	483	1_day_old
TCAGCTAT_ATCCAGGA_TAACGATT_GCGGTTAA	643	1_day_old
TCAGCTAT_ATGGTCAT_ATGTAGAC_CGGCGACA	3242	1_day_old
TCAGCTAT_ATTACCGT_AAGGAATC_TGCGAAGT	972	1_day_old
TCAGCTAT_ATTACCGT_AAGGAATC_TTACGCCG	1827	1_day_old
TCAGCTAT_CCAGTTTA_GTCCTTCG_CGGCGACA	1431	1_day_old
TCAGCTAT_CGATAGGG_ATGTAGAC_GTCACGTC	302	1_day_old
TCAGCTAT_CGATAGGG_GTCCTTCG_CCATTGTG	1051	1_day_old
TCAGCTAT_CTAAGCCT_ATGTAGAC_CGGCGACA	528	1_day_old
TCAGCTAT_CTAAGCCT_GTCCTTCG_CCATTGTG	1593	1_day_old
TCAGCTAT_CTCTCTAT_ATGTAGAC_GCGGTTAA	1730	1_day_old
TCAGCTAT_GAACTCGA_ATGTAGAC_TGCGAAGT	1051	1_day_old
TCAGCTAT_GATCATTC_AAGGAATC_GTCACGTC	3764	1_day_old
TCAGCTAT_GGCACGGA_GTCCTTCG_CCATTGTG	967	1_day_old
TCAGCTAT_TAAGTTAC_TAACGATT_CGGCGACA	251	1_day_old
TCAGCTAT_TACTGACC_GTCCTTCG_AATAACGT	5782	1_day_old
TCAGCTAT_TATCCTCT_TAACGATT_GTCACGTC	750	1_day_old
TCAGCTAT_TGGGCGGT_AAGGAATC_AATAACGT	110	1_day_old
TCAGCTAT_TTGCCTAA_TAACGATT_GCGGTTAA	1732	1_day_old
TCCTGAGC_AACATGAT_AAGGAATC_AATTCTAA	855	1_day_old
TCCTGAGC_ACATTCGT_ATGTAGAC_GTCACGTC	2939	1_day_old
TCCTGAGC_ACGATAAC_AAGGAATC_GCGGTTAA	150	1_day_old
TCCTGAGC_ACGATAAC_GTCCTTCG_TTACGCCG	1348	1_day_old
TCCTGAGC_ACTGCATA_TAACGATT_AATAACGT	719	1_day_old
TCCTGAGC_ACTTAGAA_ATGTAGAC_TGCGAAGT	1146	1_day_old
TCCTGAGC_AGCCGTTC_ATGTAGAC_AATTCTAA	1045	1_day_old
TCCTGAGC_AGCCGTTC_GTCCTTCG_TTACGCCG	570	1_day_old
TCCTGAGC_AGGTTGCC_TAACGATT_GCGGTTAA	906	1_day_old
TCCTGAGC_ATCCAGGA_TAACGATT_GTCACGTC	1832	1_day_old
TCCTGAGC_ATGGTCAT_GTCCTTCG_AATAACGT	3456	1_day_old
TCCTGAGC_ATTACCGT_AAGGAATC_TTACGCCG	204	1_day_old
TCCTGAGC_ATTGGGTC_GTCCTTCG_TTACGCCG	6418	1_day_old
TCCTGAGC_CCAGTTTA_AAGGAATC_TGCGAAGT	298	1_day_old
TCCTGAGC_CCAGTTTA_GTCCTTCG_TGCGAAGT	111	1_day_old
TCCTGAGC_CCTTATGT_GTCCTTCG_AATAACGT	1621	1_day_old
TCCTGAGC_CGTACCAA_GTCCTTCG_AATAACGT	266	1_day_old
TCCTGAGC_CTAAGCCT_AAGGAATC_AATTCTAA	3237	1_day_old
TCCTGAGC_CTAAGCCT_AAGGAATC_CGGCGACA	1739	1_day_old
TCCTGAGC_CTCTCTAT_AAGGAATC_GCGGTTAA	4581	1_day_old
TCCTGAGC_CTTTAACA_GTCCTTCG_CCATTGTG	805	1_day_old
TCCTGAGC_CTTTAACA_GTCCTTCG_GTCACGTC	928	1_day_old
TCCTGAGC_CTTTAACA_TAACGATT_TGCGAAGT	411	1_day_old
TCCTGAGC_GAACTCGA_AAGGAATC_CCATTGTG	1178	1_day_old
TCCTGAGC_GAACTCGA_AAGGAATC_CGGCGACA	3123	1_day_old
TCCTGAGC_GAACTCGA_TAACGATT_CCATTGTG	1463	1_day_old
TCCTGAGC_GAGACGTG_GTCCTTCG_AATTCTAA	2484	1_day_old
TCCTGAGC_GATCATTC_AAGGAATC_GCGGTTAA	139	1_day_old
TCCTGAGC_GCAGCCTC_ATGTAGAC_CGGCGACA	508	1_day_old
TCCTGAGC_GCAGCCTC_GTCCTTCG_GCGGTTAA	1128	1_day_old
TCCTGAGC_GGTGAAGG_AAGGAATC_TTACGCCG	1078	1_day_old
TCCTGAGC_GGTTCAAT_TAACGATT_GTCACGTC	845	1_day_old
TCCTGAGC_GTAAGGAG_AAGGAATC_GTCACGTC	1052	1_day_old
TCCTGAGC_TAACCAAG_AAGGAATC_GCGGTTAA	134	1_day_old
TCCTGAGC_TAACCAAG_GTCCTTCG_TTACGCCG	147	1_day_old
TCCTGAGC_TACTGACC_AAGGAATC_TGCGAAGT	420	1_day_old
TCCTGAGC_TAGATCGC_AAGGAATC_AATTCTAA	4368	1_day_old
TCCTGAGC_TAGATCGC_AAGGAATC_GCGGTTAA	146	1_day_old
TCCTGAGC_TCAAGAGC_TAACGATT_AATAACGT	856	1_day_old
TCCTGAGC_TCCATCAA_TAACGATT_AATTCTAA	377	1_day_old
TCCTGAGC_TCCGAGTT_ATGTAGAC_AATAACGT	1633	1_day_old
TCCTGAGC_TCCGAGTT_GTCCTTCG_TGCGAAGT	834	1_day_old
TCCTGAGC_TCCGAGTT_TAACGATT_AATAACGT	1350	1_day_old
TCCTGAGC_TCCGAGTT_TAACGATT_CCATTGTG	741	1_day_old
TCCTGAGC_TGATGAAA_AAGGAATC_TGCGAAGT	1410	1_day_old
TCCTGAGC_TGATTGTT_GTCCTTCG_AATTCTAA	469	1_day_old
TCCTGAGC_TGTTCCTG_TAACGATT_TGCGAAGT	588	1_day_old
TCCTGAGC_TTAACTTG_TAACGATT_GCGGTTAA	682	1_day_old
TCCTGAGC_TTTCTAGC_AAGGAATC_AATTCTAA	1248	1_day_old
TCCTGAGC_TTTCTAGC_AAGGAATC_CGGCGACA	972	1_day_old
TCTTATTA_AATCTACA_TAACGATT_TGCGAAGT	271	1_day_old
TCTTATTA_ACTGCATA_AAGGAATC_GCGGTTAA	2870	1_day_old
TCTTATTA_AGAGTAGA_AAGGAATC_TTACGCCG	1602	1_day_old
TCTTATTA_AGCCGTTC_AAGGAATC_TTACGCCG	613	1_day_old
TCTTATTA_ATCCAGGA_AAGGAATC_AATTCTAA	1167	1_day_old
TCTTATTA_ATCCAGGA_AAGGAATC_CCATTGTG	7484	1_day_old
TCTTATTA_ATCCAGGA_AAGGAATC_TTACGCCG	878	1_day_old
TCTTATTA_ATCCAGGA_ATGTAGAC_GTCACGTC	1416	1_day_old
TCTTATTA_ATCCAGGA_ATGTAGAC_TTACGCCG	3541	1_day_old
TCTTATTA_ATTACCGT_TAACGATT_AATTCTAA	155	1_day_old
TCTTATTA_CTAAGCCT_AAGGAATC_GCGGTTAA	1409	1_day_old
TCTTATTA_GATCATTC_AAGGAATC_CCATTGTG	4244	1_day_old
TCTTATTA_GATCATTC_GTCCTTCG_TGCGAAGT	440	1_day_old
TCTTATTA_GATCATTC_TAACGATT_TTACGCCG	488	1_day_old
TCTTATTA_GCAAATTT_GTCCTTCG_TGCGAAGT	341	1_day_old
TCTTATTA_GCAGCCTC_ATGTAGAC_TTACGCCG	2127	1_day_old
TCTTATTA_GCATTAAG_TAACGATT_TGCGAAGT	258	1_day_old
TCTTATTA_GGGCTTGG_GTCCTTCG_GCGGTTAA	3281	1_day_old
TCTTATTA_GGTTCAAT_GTCCTTCG_CGGCGACA	1641	1_day_old
TCTTATTA_TAACCAAG_AAGGAATC_TTACGCCG	1334	1_day_old
TCTTATTA_TACTGACC_ATGTAGAC_TGCGAAGT	995	1_day_old
TCTTATTA_TCCATCAA_GTCCTTCG_GCGGTTAA	935	1_day_old
TCTTATTA_TCCATCAA_GTCCTTCG_GTCACGTC	1034	1_day_old
TCTTATTA_TCCATCAA_TAACGATT_GTCACGTC	565	1_day_old
TCTTATTA_TGGAAATC_TAACGATT_CGGCGACA	488	1_day_old
TCTTATTA_TGGGCGGT_AAGGAATC_GCGGTTAA	1691	1_day_old
TCTTATTA_TTAACTTG_ATGTAGAC_TTACGCCG	711	1_day_old
TCTTATTA_TTAACTTG_GTCCTTCG_TTACGCCG	3058	1_day_old
TCTTATTA_TTCGTGCA_AAGGAATC_AATAACGT	1180	1_day_old
TCTTATTA_TTCGTGCA_GTCCTTCG_CGGCGACA	664	1_day_old
TGCTGGGT_AACATGAT_AAGGAATC_GCGGTTAA	1014	1_day_old
TGCTGGGT_AAGGAGTA_AAGGAATC_CCATTGTG	497	1_day_old
TGCTGGGT_ACCGGCCC_ATGTAGAC_AATAACGT	2333	1_day_old
TGCTGGGT_ACCGGCCC_ATGTAGAC_CCATTGTG	821	1_day_old
TGCTGGGT_ACCGGCCC_TAACGATT_CGGCGACA	1282	1_day_old
TGCTGGGT_ACGCGCAG_GTCCTTCG_CCATTGTG	661	1_day_old
TGCTGGGT_ACGCGCAG_GTCCTTCG_GCGGTTAA	1063	1_day_old
TGCTGGGT_ACTTGTTG_GTCCTTCG_CGGCGACA	1448	1_day_old
TGCTGGGT_AGCCGTTC_AAGGAATC_GCGGTTAA	105	1_day_old
TGCTGGGT_AGTCCGAG_TAACGATT_TTACGCCG	216	1_day_old
TGCTGGGT_ATCCAGGA_AAGGAATC_CCATTGTG	743	1_day_old
TGCTGGGT_ATTGGGTC_GTCCTTCG_GCGGTTAA	214	1_day_old
TGCTGGGT_ATTGGGTC_GTCCTTCG_TTACGCCG	1698	1_day_old
TGCTGGGT_CCCTTGGA_GTCCTTCG_TTACGCCG	246	1_day_old
TGCTGGGT_CCCTTGGA_TAACGATT_TGCGAAGT	385	1_day_old
TGCTGGGT_CCTGCGGG_GTCCTTCG_AATTCTAA	902	1_day_old
TGCTGGGT_CGATAGGG_AAGGAATC_AATTCTAA	173	1_day_old
TGCTGGGT_CGATAGGG_ATGTAGAC_CGGCGACA	430	1_day_old
TGCTGGGT_CGCCAGAT_ATGTAGAC_CGGCGACA	169	1_day_old
TGCTGGGT_CGGACTGC_TAACGATT_TTACGCCG	1382	1_day_old
TGCTGGGT_CTAAGCCT_AAGGAATC_GTCACGTC	115	1_day_old
TGCTGGGT_CTCTCTAT_AAGGAATC_TGCGAAGT	846	1_day_old
TGCTGGGT_GATCATTC_ATGTAGAC_TTACGCCG	1802	1_day_old
TGCTGGGT_GATCATTC_GTCCTTCG_TGCGAAGT	658	1_day_old
TGCTGGGT_GCAGCCTC_ATGTAGAC_AATTCTAA	195	1_day_old
TGCTGGGT_GGCACGGA_AAGGAATC_GTCACGTC	3495	1_day_old
TGCTGGGT_GGCACGGA_GTCCTTCG_TTACGCCG	1828	1_day_old
TGCTGGGT_GGCACGGA_TAACGATT_AATTCTAA	841	1_day_old
TGCTGGGT_GGTGAAGG_AAGGAATC_TTACGCCG	1173	1_day_old
TGCTGGGT_GGTGAAGG_TAACGATT_AATAACGT	317	1_day_old
TGCTGGGT_GGTTCAAT_AAGGAATC_GCGGTTAA	2439	1_day_old
TGCTGGGT_GTCGGACT_TAACGATT_TTACGCCG	1383	1_day_old
TGCTGGGT_TAAGTTAC_ATGTAGAC_CGGCGACA	3456	1_day_old
TGCTGGGT_TACTGACC_AAGGAATC_TGCGAAGT	1276	1_day_old
TGCTGGGT_TATTTGCG_TAACGATT_AATTCTAA	714	1_day_old
TGCTGGGT_TGATGAAA_AAGGAATC_AATTCTAA	828	1_day_old
TGCTGGGT_TGATTGTT_AAGGAATC_TGCGAAGT	808	1_day_old
TGCTGGGT_TGGGCGGT_ATGTAGAC_GTCACGTC	1335	1_day_old
TGCTGGGT_TGTTCCTG_AAGGAATC_AATTCTAA	4605	1_day_old
TGCTGGGT_TGTTCCTG_AAGGAATC_GCGGTTAA	1504	1_day_old
TGCTGGGT_TTCGTGCA_AAGGAATC_AATTCTAA	1361	1_day_old
TGGATCTG_AAGGAGTA_TAACGATT_AATTCTAA	551	1_day_old
TGGATCTG_AATCTACA_ATGTAGAC_GTCACGTC	583	1_day_old
TGGATCTG_ACGATAAC_ATGTAGAC_CGGCGACA	1028	1_day_old
TGGATCTG_ACGCGCAG_ATGTAGAC_TTACGCCG	1059	1_day_old
TGGATCTG_AGCCGTTC_GTCCTTCG_TTACGCCG	2334	1_day_old
TGGATCTG_AGCCGTTC_TAACGATT_TTACGCCG	3741	1_day_old
TGGATCTG_AGGTTGCC_AAGGAATC_GCGGTTAA	1076	1_day_old
TGGATCTG_ATCGAATG_GTCCTTCG_GTCACGTC	1418	1_day_old
TGGATCTG_CCAGTTTA_TAACGATT_GCGGTTAA	340	1_day_old
TGGATCTG_CCTGCGGG_AAGGAATC_AATAACGT	1180	1_day_old
TGGATCTG_CGATAGGG_TAACGATT_CCATTGTG	1202	1_day_old
TGGATCTG_CGCCAGAT_AAGGAATC_TTACGCCG	1077	1_day_old
TGGATCTG_CGCCAGAT_GTCCTTCG_CCATTGTG	612	1_day_old
TGGATCTG_CGTACCAA_GTCCTTCG_GCGGTTAA	1029	1_day_old
TGGATCTG_GAACTCGA_AAGGAATC_CGGCGACA	982	1_day_old
TGGATCTG_GAACTCGA_GTCCTTCG_AATAACGT	1960	1_day_old
TGGATCTG_GCAGCCTC_ATGTAGAC_CGGCGACA	1204	1_day_old
TGGATCTG_GGTTCAAT_ATGTAGAC_CCATTGTG	5352	1_day_old
TGGATCTG_TAACCAAG_AAGGAATC_AATAACGT	2122	1_day_old
TGGATCTG_TAAGTTAC_AAGGAATC_GCGGTTAA	1047	1_day_old
TGGATCTG_TAAGTTAC_ATGTAGAC_CCATTGTG	958	1_day_old
TGGATCTG_TAAGTTAC_ATGTAGAC_CGGCGACA	1131	1_day_old
TGGATCTG_TAAGTTAC_ATGTAGAC_GCGGTTAA	902	1_day_old
TGGATCTG_TAAGTTAC_GTCCTTCG_AATTCTAA	862	1_day_old
TGGATCTG_TATTTGCG_ATGTAGAC_AATTCTAA	115	1_day_old
TGGATCTG_TCAAGAGC_TAACGATT_CGGCGACA	537	1_day_old
TGGATCTG_TGCATACT_AAGGAATC_CGGCGACA	164	1_day_old
TGGATCTG_TGGGCGGT_TAACGATT_CGGCGACA	678	1_day_old
TGGATCTG_TGTTCCTG_GTCCTTCG_GCGGTTAA	2941	1_day_old
TGGATCTG_TTCGTGCA_AAGGAATC_CCATTGTG	3441	1_day_old
TGGATCTG_TTGCCTAA_GTCCTTCG_TGCGAAGT	471	1_day_old
TGGGTTTC_AAGGAGTA_TAACGATT_CCATTGTG	1004	1_day_old
TGGGTTTC_ACTTGTTG_ATGTAGAC_CGGCGACA	4052	1_day_old
TGGGTTTC_AGAGATCT_GTCCTTCG_GCGGTTAA	137	1_day_old
TGGGTTTC_AGAGATCT_TAACGATT_GTCACGTC	326	1_day_old
TGGGTTTC_AGGTTGCC_AAGGAATC_CCATTGTG	287	1_day_old
TGGGTTTC_ATTACCGT_ATGTAGAC_GTCACGTC	484	1_day_old
TGGGTTTC_CCCTTGGA_AAGGAATC_CCATTGTG	1256	1_day_old
TGGGTTTC_CCTGCGGG_ATGTAGAC_GCGGTTAA	1161	1_day_old
TGGGTTTC_CGCCAGAT_ATGTAGAC_GTCACGTC	1917	1_day_old
TGGGTTTC_GACGTGGC_AAGGAATC_CCATTGTG	1045	1_day_old
TGGGTTTC_GACGTGGC_TAACGATT_GCGGTTAA	872	1_day_old
TGGGTTTC_GCAAATTT_AAGGAATC_CCATTGTG	5886	1_day_old
TGGGTTTC_GCAAATTT_ATGTAGAC_CCATTGTG	2064	1_day_old
TGGGTTTC_GCCCACGT_AAGGAATC_AATAACGT	132	1_day_old
TGGGTTTC_GGTGAAGG_AAGGAATC_TTACGCCG	107	1_day_old
TGGGTTTC_GGTTCAAT_AAGGAATC_TGCGAAGT	602	1_day_old
TGGGTTTC_GGTTCAAT_GTCCTTCG_TGCGAAGT	570	1_day_old
TGGGTTTC_GTAAGGAG_AAGGAATC_AATAACGT	2817	1_day_old
TGGGTTTC_GTGTATCG_AAGGAATC_TGCGAAGT	1026	1_day_old
TGGGTTTC_TACTGACC_AAGGAATC_GTCACGTC	3681	1_day_old
TGGGTTTC_TCAAGAGC_AAGGAATC_AATAACGT	2523	1_day_old
TGGGTTTC_TCCGAGTT_AAGGAATC_TTACGCCG	1439	1_day_old
TGGGTTTC_TGATTGTT_AAGGAATC_GTCACGTC	2048	1_day_old
TGGGTTTC_TGATTGTT_ATGTAGAC_TTACGCCG	1798	1_day_old
TGGGTTTC_TGATTGTT_TAACGATT_AATTCTAA	2068	1_day_old
TGGGTTTC_TGTTCCTG_GTCCTTCG_CGGCGACA	954	1_day_old
TGGGTTTC_TTAACTTG_ATGTAGAC_CCATTGTG	1044	1_day_old
TGGGTTTC_TTGCCTAA_ATGTAGAC_GTCACGTC	6438	1_day_old
TGGTCACA_AATCTACA_AAGGAATC_CGGCGACA	937	1_day_old
TGGTCACA_ACGATAAC_GTCCTTCG_TTACGCCG	3426	1_day_old
TGGTCACA_ACTTGTTG_AAGGAATC_CCATTGTG	1381	1_day_old
TGGTCACA_ACTTGTTG_GTCCTTCG_CGGCGACA	351	1_day_old
TGGTCACA_ACTTGTTG_TAACGATT_GCGGTTAA	483	1_day_old
TGGTCACA_AGAGATCT_GTCCTTCG_GCGGTTAA	539	1_day_old
TGGTCACA_AGTCCGAG_GTCCTTCG_GCGGTTAA	207	1_day_old
TGGTCACA_ATGGTCAT_AAGGAATC_GCGGTTAA	1215	1_day_old
TGGTCACA_ATGGTCAT_AAGGAATC_TTACGCCG	992	1_day_old
TGGTCACA_ATTACCGT_GTCCTTCG_TTACGCCG	211	1_day_old
TGGTCACA_CAGCAACG_AAGGAATC_TGCGAAGT	655	1_day_old
TGGTCACA_CCCTTGGA_TAACGATT_CCATTGTG	228	1_day_old
TGGTCACA_CCCTTGGA_TAACGATT_GTCACGTC	107	1_day_old
TGGTCACA_CGATAGGG_GTCCTTCG_GCGGTTAA	1079	1_day_old
TGGTCACA_CGCCAGAT_GTCCTTCG_GTCACGTC	1960	1_day_old
TGGTCACA_CGGACTGC_TAACGATT_GTCACGTC	569	1_day_old
TGGTCACA_CTTTAACA_TAACGATT_TGCGAAGT	165	1_day_old
TGGTCACA_GATCATTC_AAGGAATC_GCGGTTAA	1777	1_day_old
TGGTCACA_GATTCCCA_GTCCTTCG_AATTCTAA	3788	1_day_old
TGGTCACA_GCAGCCTC_AAGGAATC_AATAACGT	1247	1_day_old
TGGTCACA_GGTGAAGG_AAGGAATC_TTACGCCG	2662	1_day_old
TGGTCACA_GGTGAAGG_ATGTAGAC_GCGGTTAA	524	1_day_old
TGGTCACA_GGTGAAGG_GTCCTTCG_CCATTGTG	288	1_day_old
TGGTCACA_GGTGAAGG_TAACGATT_AATAACGT	364	1_day_old
TGGTCACA_GGTTCAAT_TAACGATT_GCGGTTAA	700	1_day_old
TGGTCACA_TAAGTTAC_ATGTAGAC_GTCACGTC	1845	1_day_old
TGGTCACA_TAAGTTAC_TAACGATT_AATTCTAA	3119	1_day_old
TGGTCACA_TACTGACC_AAGGAATC_CGGCGACA	208	1_day_old
TGGTCACA_TCACATGG_AAGGAATC_AATTCTAA	1382	1_day_old
TGGTCACA_TCCATCAA_AAGGAATC_TTACGCCG	1257	1_day_old
TGGTCACA_TCCGAGTT_AAGGAATC_GCGGTTAA	638	1_day_old
TGGTCACA_TCCGAGTT_AAGGAATC_TTACGCCG	917	1_day_old
TGGTCACA_TCTGGCGA_TAACGATT_GTCACGTC	1750	1_day_old
TGGTCACA_TGATGAAA_GTCCTTCG_TTACGCCG	3988	1_day_old
TGGTCACA_TGATTGTT_AAGGAATC_GTCACGTC	1474	1_day_old
TGGTCACA_TGCATACT_AAGGAATC_CGGCGACA	1113	1_day_old
TGGTCACA_TGCATACT_AAGGAATC_TGCGAAGT	1604	1_day_old
TGGTCACA_TTGCCTAA_GTCCTTCG_CGGCGACA	1214	1_day_old
TGGTCACA_TTTCTAGC_TAACGATT_AATTCTAA	1447	1_day_old
TGTGCCTT_ACATTCGT_GTCCTTCG_CGGCGACA	979	1_day_old
TGTGCCTT_ACGATAAC_GTCCTTCG_TGCGAAGT	960	1_day_old
TGTGCCTT_ACTTAGAA_AAGGAATC_AATAACGT	2874	1_day_old
TGTGCCTT_AGGTTGCC_ATGTAGAC_TTACGCCG	2176	1_day_old
TGTGCCTT_AGTCCGAG_ATGTAGAC_GCGGTTAA	870	1_day_old
TGTGCCTT_ATCCAGGA_TAACGATT_CGGCGACA	885	1_day_old
TGTGCCTT_ATTACCGT_TAACGATT_AATTCTAA	1388	1_day_old
TGTGCCTT_CCAGTTTA_ATGTAGAC_CGGCGACA	1594	1_day_old
TGTGCCTT_CGATAGGG_TAACGATT_AATTCTAA	676	1_day_old
TGTGCCTT_CGGACTGC_GTCCTTCG_GCGGTTAA	1159	1_day_old
TGTGCCTT_CGGACTGC_TAACGATT_GCGGTTAA	464	1_day_old
TGTGCCTT_CGGACTGC_TAACGATT_TGCGAAGT	539	1_day_old
TGTGCCTT_CGTACCAA_TAACGATT_CCATTGTG	715	1_day_old
TGTGCCTT_CTAAGCCT_ATGTAGAC_CGGCGACA	1689	1_day_old
TGTGCCTT_CTCTCTAT_ATGTAGAC_GTCACGTC	1240	1_day_old
TGTGCCTT_GAGACGTG_GTCCTTCG_TTACGCCG	2167	1_day_old
TGTGCCTT_GATCATTC_TAACGATT_CGGCGACA	1199	1_day_old
TGTGCCTT_GCATTAAG_GTCCTTCG_GCGGTTAA	2530	1_day_old
TGTGCCTT_GGTTCAAT_TAACGATT_AATAACGT	1175	1_day_old
TGTGCCTT_TACTGACC_TAACGATT_AATTCTAA	608	1_day_old
TGTGCCTT_TATCCTCT_TAACGATT_AATTCTAA	492	1_day_old
TGTGCCTT_TCAAGAGC_AAGGAATC_TTACGCCG	2170	1_day_old
TGTGCCTT_TCACATGG_AAGGAATC_AATAACGT	1545	1_day_old
TGTGCCTT_TCCATCAA_AAGGAATC_GTCACGTC	1253	1_day_old
TGTGCCTT_TCTGGCGA_AAGGAATC_CGGCGACA	1289	1_day_old
TGTGCCTT_TGCATACT_ATGTAGAC_AATTCTAA	949	1_day_old
TGTGCCTT_TGGAAATC_AAGGAATC_GTCACGTC	1560	1_day_old
TGTGCCTT_TGGAAATC_GTCCTTCG_AATAACGT	2943	1_day_old
TGTGCCTT_TTAACTTG_ATGTAGAC_AATAACGT	4106	1_day_old
TTATGAAA_ACGATAAC_ATGTAGAC_CCATTGTG	127	1_day_old
TTATGAAA_ACGCGCAG_TAACGATT_GTCACGTC	413	1_day_old
TTATGAAA_AGCCGTTC_GTCCTTCG_GTCACGTC	2082	1_day_old
TTATGAAA_AGTCCGAG_AAGGAATC_TGCGAAGT	128	1_day_old
TTATGAAA_ATCGAATG_ATGTAGAC_TGCGAAGT	466	1_day_old
TTATGAAA_ATGGTCAT_AAGGAATC_TGCGAAGT	1163	1_day_old
TTATGAAA_CAGCAACG_AAGGAATC_TTACGCCG	2902	1_day_old
TTATGAAA_CGATAGGG_ATGTAGAC_GCGGTTAA	914	1_day_old
TTATGAAA_CGCCAGAT_AAGGAATC_CCATTGTG	1212	1_day_old
TTATGAAA_CTAAGCCT_TAACGATT_CCATTGTG	914	1_day_old
TTATGAAA_CTCTCTAT_TAACGATT_TTACGCCG	163	1_day_old
TTATGAAA_TCACATGG_ATGTAGAC_GCGGTTAA	923	1_day_old
TTATGAAA_TTAACTTG_TAACGATT_CCATTGTG	1479	1_day_old
TTATGAAA_TTTCTAGC_ATGTAGAC_CCATTGTG	1501	1_day_old
TTCCATAT_AACATGAT_AAGGAATC_GTCACGTC	1433	1_day_old
TTCCATAT_AATCTACA_AAGGAATC_TGCGAAGT	1337	1_day_old
TTCCATAT_ACCGGCCC_AAGGAATC_AATTCTAA	3280	1_day_old
TTCCATAT_ACTGCATA_AAGGAATC_TGCGAAGT	940	1_day_old
TTCCATAT_ACTGCATA_GTCCTTCG_AATTCTAA	350	1_day_old
TTCCATAT_AGAGATCT_GTCCTTCG_GCGGTTAA	147	1_day_old
TTCCATAT_ATGGTCAT_TAACGATT_GCGGTTAA	1943	1_day_old
TTCCATAT_ATTGGGTC_AAGGAATC_TGCGAAGT	1586	1_day_old
TTCCATAT_CAGCAACG_GTCCTTCG_TTACGCCG	3870	1_day_old
TTCCATAT_CCAGTTTA_AAGGAATC_AATAACGT	389	1_day_old
TTCCATAT_CGCCAGAT_TAACGATT_AATAACGT	4184	1_day_old
TTCCATAT_CTCTCTAT_ATGTAGAC_TGCGAAGT	566	1_day_old
TTCCATAT_CTCTCTAT_ATGTAGAC_TTACGCCG	212	1_day_old
TTCCATAT_GACGTGGC_AAGGAATC_TGCGAAGT	1830	1_day_old
TTCCATAT_GCAAATTT_TAACGATT_GTCACGTC	318	1_day_old
TTCCATAT_GCAAATTT_TAACGATT_TTACGCCG	1544	1_day_old
TTCCATAT_GGTGAAGG_AAGGAATC_TTACGCCG	168	1_day_old
TTCCATAT_GGTTCAAT_AAGGAATC_TGCGAAGT	1231	1_day_old
TTCCATAT_GTGTATCG_ATGTAGAC_GCGGTTAA	2620	1_day_old
TTCCATAT_GTGTATCG_GTCCTTCG_AATTCTAA	374	1_day_old
TTCCATAT_TAACCAAG_AAGGAATC_AATTCTAA	1637	1_day_old
TTCCATAT_TAAGTTAC_ATGTAGAC_GTCACGTC	119	1_day_old
TTCCATAT_TAGATCGC_ATGTAGAC_GTCACGTC	2040	1_day_old
TTCCATAT_TATCCTCT_AAGGAATC_TGCGAAGT	811	1_day_old
TTCCATAT_TCACATGG_GTCCTTCG_CGGCGACA	1439	1_day_old
TTCCATAT_TCTGGCGA_TAACGATT_CGGCGACA	446	1_day_old
TTCCATAT_TGATGAAA_GTCCTTCG_AATTCTAA	3627	1_day_old
TTCCATAT_TGATGAAA_GTCCTTCG_GCGGTTAA	769	1_day_old
TTCCATAT_TGATTGTT_GTCCTTCG_TGCGAAGT	836	1_day_old
TTCCATAT_TGCATACT_GTCCTTCG_AATAACGT	2032	1_day_old
TTCCATAT_TGTTCCTG_AAGGAATC_TTACGCCG	1662	1_day_old
TTCCATAT_TTCGTGCA_GTCCTTCG_AATAACGT	126	1_day_old
TTCGCGGC_AATCTACA_ATGTAGAC_TGCGAAGT	645	1_day_old
TTCGCGGC_ACGATAAC_GTCCTTCG_TTACGCCG	103	1_day_old
TTCGCGGC_ACTGCATA_TAACGATT_GCGGTTAA	707	1_day_old
TTCGCGGC_AGGTTGCC_ATGTAGAC_AATTCTAA	1194	1_day_old
TTCGCGGC_ATGGTCAT_GTCCTTCG_TTACGCCG	496	1_day_old
TTCGCGGC_CCCTTGGA_AAGGAATC_AATTCTAA	204	1_day_old
TTCGCGGC_CCTGCGGG_AAGGAATC_AATAACGT	776	1_day_old
TTCGCGGC_CCTGCGGG_GTCCTTCG_TTACGCCG	1016	1_day_old
TTCGCGGC_CCTTATGT_GTCCTTCG_AATAACGT	1706	1_day_old
TTCGCGGC_CGATAGGG_AAGGAATC_TTACGCCG	486	1_day_old
TTCGCGGC_CGTACCAA_TAACGATT_AATTCTAA	615	1_day_old
TTCGCGGC_CTAGAAGT_GTCCTTCG_TTACGCCG	404	1_day_old
TTCGCGGC_GAACTCGA_AAGGAATC_AATTCTAA	2927	1_day_old
TTCGCGGC_GCAAATTT_ATGTAGAC_CCATTGTG	3077	1_day_old
TTCGCGGC_GCAGCCTC_ATGTAGAC_TGCGAAGT	554	1_day_old
TTCGCGGC_GCATTAAG_GTCCTTCG_GTCACGTC	1165	1_day_old
TTCGCGGC_GCATTAAG_TAACGATT_AATAACGT	1529	1_day_old
TTCGCGGC_GGCACGGA_ATGTAGAC_CCATTGTG	4545	1_day_old
TTCGCGGC_GGTGAAGG_AAGGAATC_TGCGAAGT	362	1_day_old
TTCGCGGC_GTGTATCG_GTCCTTCG_TTACGCCG	535	1_day_old
TTCGCGGC_TAACCAAG_GTCCTTCG_GCGGTTAA	1991	1_day_old
TTCGCGGC_TAGATCGC_TAACGATT_GTCACGTC	1164	1_day_old
TTCGCGGC_TCACATGG_ATGTAGAC_CCATTGTG	1369	1_day_old
TTCGCGGC_TCCGAGTT_AAGGAATC_TGCGAAGT	1038	1_day_old
TTCGCGGC_TGATGAAA_GTCCTTCG_TTACGCCG	218	1_day_old
TTCGCGGC_TGGGCGGT_TAACGATT_CGGCGACA	2853	1_day_old
TTCGCGGC_TGTTCCTG_TAACGATT_AATAACGT	672	1_day_old
TTCGCGGC_TTCGTGCA_ATGTAGAC_AATAACGT	1234	1_day_old
TTCGCGGC_TTGCCTAA_ATGTAGAC_CGGCGACA	1834	1_day_old
TTCGCGGC_TTGCCTAA_TAACGATT_AATAACGT	965	1_day_old
TTGACCCT_ACATTCGT_AAGGAATC_TTACGCCG	1895	1_day_old
TTGACCCT_ACATTCGT_GTCCTTCG_TTACGCCG	2346	1_day_old
TTGACCCT_ACGCGCAG_GTCCTTCG_TTACGCCG	717	1_day_old
TTGACCCT_ACTTGTTG_ATGTAGAC_GTCACGTC	1465	1_day_old
TTGACCCT_AGGTTGCC_AAGGAATC_GTCACGTC	997	1_day_old
TTGACCCT_AGGTTGCC_AAGGAATC_TGCGAAGT	581	1_day_old
TTGACCCT_ATCCAGGA_AAGGAATC_AATAACGT	1724	1_day_old
TTGACCCT_ATCCAGGA_ATGTAGAC_AATAACGT	1663	1_day_old
TTGACCCT_CCAGTTTA_ATGTAGAC_TTACGCCG	4844	1_day_old
TTGACCCT_CCAGTTTA_GTCCTTCG_TGCGAAGT	1267	1_day_old
TTGACCCT_CCCTTGGA_AAGGAATC_TTACGCCG	493	1_day_old
TTGACCCT_CCTGCGGG_AAGGAATC_TGCGAAGT	538	1_day_old
TTGACCCT_CCTGCGGG_AAGGAATC_TTACGCCG	999	1_day_old
TTGACCCT_CGTAGACC_AAGGAATC_AATTCTAA	323	1_day_old
TTGACCCT_CTAGAAGT_AAGGAATC_TGCGAAGT	1005	1_day_old
TTGACCCT_CTTTAACA_AAGGAATC_CCATTGTG	1148	1_day_old
TTGACCCT_GACGTGGC_GTCCTTCG_TTACGCCG	426	1_day_old
TTGACCCT_GATTCCCA_TAACGATT_GCGGTTAA	1771	1_day_old
TTGACCCT_TAACCAAG_GTCCTTCG_CGGCGACA	1144	1_day_old
TTGACCCT_TAAGTTAC_AAGGAATC_GTCACGTC	1194	1_day_old
TTGACCCT_TCACATGG_AAGGAATC_GTCACGTC	548	1_day_old
TTGACCCT_TCCATCAA_GTCCTTCG_CCATTGTG	1261	1_day_old
TTGACCCT_TGGAAATC_GTCCTTCG_GCGGTTAA	4746	1_day_old
TTGCTAAG_AACATGAT_TAACGATT_GCGGTTAA	830	1_day_old
TTGCTAAG_ACATTCGT_ATGTAGAC_AATAACGT	1653	1_day_old
TTGCTAAG_ACATTCGT_ATGTAGAC_AATTCTAA	1410	1_day_old
TTGCTAAG_ACATTCGT_GTCCTTCG_CCATTGTG	3426	1_day_old
TTGCTAAG_ACGATAAC_AAGGAATC_GCGGTTAA	1271	1_day_old
TTGCTAAG_ACTTGTTG_ATGTAGAC_GTCACGTC	740	1_day_old
TTGCTAAG_ACTTGTTG_TAACGATT_GTCACGTC	1418	1_day_old
TTGCTAAG_AGAGTAGA_AAGGAATC_AATAACGT	2788	1_day_old
TTGCTAAG_ATCGAATG_GTCCTTCG_AATAACGT	2825	1_day_old
TTGCTAAG_ATCGAATG_TAACGATT_CGGCGACA	640	1_day_old
TTGCTAAG_ATGGTCAT_ATGTAGAC_AATAACGT	2502	1_day_old
TTGCTAAG_CTTTAACA_AAGGAATC_CCATTGTG	1241	1_day_old
TTGCTAAG_GACGTGGC_ATGTAGAC_GTCACGTC	2526	1_day_old
TTGCTAAG_GATCATTC_AAGGAATC_CGGCGACA	6455	1_day_old
TTGCTAAG_GATTCCCA_GTCCTTCG_GCGGTTAA	2418	1_day_old
TTGCTAAG_GCAGCCTC_AAGGAATC_AATTCTAA	1407	1_day_old
TTGCTAAG_GCAGCCTC_ATGTAGAC_CCATTGTG	2086	1_day_old
TTGCTAAG_GGGCTTGG_TAACGATT_AATTCTAA	1083	1_day_old
TTGCTAAG_GTAAGGAG_TAACGATT_TGCGAAGT	364	1_day_old
TTGCTAAG_GTGTATCG_GTCCTTCG_GTCACGTC	1087	1_day_old
TTGCTAAG_TACTGACC_GTCCTTCG_CGGCGACA	3288	1_day_old
TTGCTAAG_TATCCTCT_TAACGATT_TGCGAAGT	476	1_day_old
TTGCTAAG_TGCATACT_GTCCTTCG_AATAACGT	1580	1_day_old
TTGCTAAG_TGGAAATC_ATGTAGAC_AATTCTAA	2090	1_day_old
TTGCTAAG_TGGAAATC_GTCCTTCG_CGGCGACA	1179	1_day_old
TTGCTAAG_TGTTCCTG_AAGGAATC_TGCGAAGT	681	1_day_old
TTGCTAAG_TTCGTGCA_ATGTAGAC_GTCACGTC	2140	1_day_old
TTTAATGC_AACATGAT_ATGTAGAC_GTCACGTC	2264	1_day_old
TTTAATGC_ACTTAGAA_AAGGAATC_CCATTGTG	1330	1_day_old
TTTAATGC_ACTTGTTG_AAGGAATC_CGGCGACA	1025	1_day_old
TTTAATGC_ACTTGTTG_AAGGAATC_GTCACGTC	1725	1_day_old
TTTAATGC_AGAGATCT_TAACGATT_CCATTGTG	693	1_day_old
TTTAATGC_AGAGATCT_TAACGATT_TTACGCCG	782	1_day_old
TTTAATGC_ATGGTCAT_GTCCTTCG_GTCACGTC	203	1_day_old
TTTAATGC_CAGCAACG_TAACGATT_AATAACGT	1772	1_day_old
TTTAATGC_CCACCGTT_GTCCTTCG_GTCACGTC	479	1_day_old
TTTAATGC_CCTGCGGG_GTCCTTCG_GTCACGTC	601	1_day_old
TTTAATGC_CCTTATGT_AAGGAATC_GCGGTTAA	1072	1_day_old
TTTAATGC_CCTTATGT_ATGTAGAC_TTACGCCG	2434	1_day_old
TTTAATGC_CGTACCAA_ATGTAGAC_GTCACGTC	517	1_day_old
TTTAATGC_CTAGAAGT_GTCCTTCG_GTCACGTC	416	1_day_old
TTTAATGC_GACGTGGC_AAGGAATC_CCATTGTG	2263	1_day_old
TTTAATGC_GACGTGGC_GTCCTTCG_AATTCTAA	1713	1_day_old
TTTAATGC_GACGTGGC_GTCCTTCG_CCATTGTG	499	1_day_old
[truncated: 38,983 more rows]

## Sheet: Table_S4_FRiP_per_cell
cell	count	total	FRiP	sample
TTTCGTCA_TTGCCTAA_TAACGATT_TTACGCCG	259	305	0.84918	1_day_old
TTTCGTCA_TTGCCTAA_TAACGATT_AATTCTAA	610	709	0.860367	1_day_old
TTTCGTCA_TTGCCTAA_GTCCTTCG_TGCGAAGT	1616	1851	0.873042	1_day_old
TTTCGTCA_TTGCCTAA_GTCCTTCG_AATAACGT	2379	2705	0.879482	1_day_old
TTTCGTCA_TTCGTGCA_TAACGATT_GCGGTTAA	92	105	0.87619	1_day_old
TTTCGTCA_TTCGTGCA_TAACGATT_AATAACGT	674	759	0.888011	1_day_old
TTTCGTCA_TTCGTGCA_AAGGAATC_TTACGCCG	847	962	0.880457	1_day_old
TTTCGTCA_TTAACTTG_TCGACCGA_AATTCTAA	3346	4015	0.833375	1_day_old
TTTCGTCA_TTAACTTG_TAACGATT_AATTCTAA	584	651	0.897081	1_day_old
TTTCGTCA_TTAACTTG_TAACGATT_AATAACGT	139	149	0.932886	1_day_old
TTTCGTCA_TTAACTTG_ATGTAGAC_GCGGTTAA	733	826	0.887409	1_day_old
TTTCGTCA_TGGGCGGT_GTCCTTCG_AATAACGT	495	564	0.87766	1_day_old
TTTCGTCA_TGGGCGGT_ATGTAGAC_AATAACGT	86	103	0.834951	1_day_old
TTTCGTCA_TGGGCGGT_AAGGAATC_GCGGTTAA	263	303	0.867987	1_day_old
TTTCGTCA_TGGAAATC_TAACGATT_AATAACGT	475	527	0.901328	1_day_old
TTTCGTCA_TGGAAATC_GTCCTTCG_TTACGCCG	2051	2389	0.858518	1_day_old
TTTCGTCA_TGGAAATC_ATGTAGAC_CGGCGACA	1621	1819	0.891149	1_day_old
TTTCGTCA_TGCATACT_GTCCTTCG_CGGCGACA	650	720	0.902778	1_day_old
TTTCGTCA_TGCATACT_ATGTAGAC_AATAACGT	2392	2774	0.862293	1_day_old
TTTCGTCA_TGATTGTT_ATGTAGAC_GTCACGTC	1149	1334	0.861319	1_day_old
TTTCGTCA_TGATTGTT_ATGTAGAC_CGGCGACA	896	1019	0.879293	1_day_old
TTTCGTCA_TGATTGTT_AAGGAATC_GTCACGTC	636	714	0.890756	1_day_old
TTTCGTCA_TGATTGTT_AAGGAATC_AATAACGT	675	752	0.897606	1_day_old
TTTCGTCA_TGATGAAA_TAACGATT_AATAACGT	184	220	0.836364	1_day_old
TTTCGTCA_TGATGAAA_ATGTAGAC_CGGCGACA	3351	3777	0.887212	1_day_old
TTTCGTCA_TGATGAAA_AAGGAATC_GCGGTTAA	165	175	0.942857	1_day_old
TTTCGTCA_TCTGGCGA_GTCCTTCG_TTACGCCG	242	266	0.909774	1_day_old
TTTCGTCA_TCTGGCGA_GTCCTTCG_AATAACGT	146	171	0.853801	1_day_old
TTTCGTCA_TCTGGCGA_CGAGCGCT_TTACGCCG	329	366	0.898907	1_day_old
TTTCGTCA_TCTGGCGA_ATGTAGAC_GCGGTTAA	693	780	0.888462	1_day_old
TTTCGTCA_TCTGGCGA_ATGTAGAC_CGGCGACA	1048	1205	0.86971	1_day_old
TTTCGTCA_TCTGGCGA_AAGGAATC_CGGCGACA	929	1059	0.877243	1_day_old
TTTCGTCA_TCCGAGTT_TCGACCGA_TTACGCCG	5576	6429	0.86732	1_day_old
TTTCGTCA_TCCGAGTT_TAACGATT_TTACGCCG	2754	3219	0.855545	1_day_old
TTTCGTCA_TCCGAGTT_CATTGTGG_CCATTGTG	4889	5776	0.846434	1_day_old
TTTCGTCA_TCACATGG_GTCCTTCG_AATAACGT	871	1015	0.858128	1_day_old
TTTCGTCA_TCACATGG_ATGTAGAC_GTCACGTC	105	118	0.889831	1_day_old
TTTCGTCA_TCAAGAGC_TAACGATT_AATTCTAA	115	131	0.877863	1_day_old
TTTCGTCA_TCAAGAGC_GTCCTTCG_CGGCGACA	675	748	0.902406	1_day_old
TTTCGTCA_TCAAGAGC_AAGGAATC_CGGCGACA	3567	4256	0.838111	1_day_old
TTTCGTCA_TATCCTCT_GTCCTTCG_AATAACGT	160	175	0.914286	1_day_old
TTTCGTCA_TATCCTCT_AAGGAATC_CCATTGTG	473	559	0.846154	1_day_old
TTTCGTCA_TAGATCGC_ATGTAGAC_AATTCTAA	761	876	0.868721	1_day_old
TTTCGTCA_TAGATCGC_AAGGAATC_CCATTGTG	824	965	0.853886	1_day_old
TTTCGTCA_TACTGACC_AAGGAATC_CCATTGTG	142	166	0.855422	1_day_old
TTTCGTCA_TAAGTTAC_GTTATCCG_CGGCGACA	587	695	0.844604	1_day_old
TTTCGTCA_TAAGTTAC_GTCCTTCG_TTACGCCG	1475	1657	0.890163	1_day_old
TTTCGTCA_TAAGTTAC_GTCCTTCG_CGGCGACA	376	412	0.912621	1_day_old
TTTCGTCA_TAAGTTAC_GTCCTTCG_AATAACGT	283	333	0.84985	1_day_old
TTTCGTCA_TAAGTTAC_ATGTAGAC_TTACGCCG	135	160	0.84375	1_day_old
TTTCGTCA_TAAGTTAC_AAGGAATC_TGCGAAGT	202	226	0.893805	1_day_old
TTTCGTCA_TAAGTTAC_AAGGAATC_GTCACGTC	90	110	0.818182	1_day_old
TTTCGTCA_TAACCAAG_TAACGATT_CGGCGACA	508	584	0.869863	1_day_old
TTTCGTCA_TAACCAAG_GTCCTTCG_CCATTGTG	1142	1300	0.878462	1_day_old
TTTCGTCA_TAACCAAG_ATGTAGAC_TTACGCCG	185	218	0.848624	1_day_old
TTTCGTCA_TAACCAAG_ATGTAGAC_CGGCGACA	171	200	0.855	1_day_old
TTTCGTCA_TAACCAAG_ATGTAGAC_CCATTGTG	1769	1990	0.888945	1_day_old
TTTCGTCA_TAACCAAG_AAGGAATC_GCGGTTAA	115	133	0.864662	1_day_old
TTTCGTCA_TAACCAAG_AAGGAATC_AATTCTAA	168	190	0.884211	1_day_old
TTTCGTCA_GTAAGGAG_TAACGATT_GCGGTTAA	439	506	0.867589	1_day_old
TTTCGTCA_GTAAGGAG_TAACGATT_CGGCGACA	312	350	0.891429	1_day_old
TTTCGTCA_GTAAGGAG_TAACGATT_CCATTGTG	453	505	0.89703	1_day_old
TTTCGTCA_GTAAGGAG_GTCCTTCG_TGCGAAGT	343	378	0.907407	1_day_old
TTTCGTCA_GTAAGGAG_GTCCTTCG_AATAACGT	227	264	0.859848	1_day_old
TTTCGTCA_GTAAGGAG_ATGTAGAC_CGGCGACA	112	129	0.868217	1_day_old
TTTCGTCA_GTAAGGAG_ATGTAGAC_AATTCTAA	96	116	0.827586	1_day_old
TTTCGTCA_GTAAGGAG_AAGGAATC_TGCGAAGT	533	603	0.883914	1_day_old
TTTCGTCA_GGTTCAAT_ATGTAGAC_GCGGTTAA	2141	2406	0.889859	1_day_old
TTTCGTCA_GGTTCAAT_AAGGAATC_GTCACGTC	398	451	0.882483	1_day_old
TTTCGTCA_GGTTCAAT_AAGGAATC_AATTCTAA	803	928	0.865302	1_day_old
TTTCGTCA_GGGCTTGG_TAACGATT_TTACGCCG	591	695	0.85036	1_day_old
TTTCGTCA_GGGCTTGG_TAACGATT_CGGCGACA	1657	1878	0.882322	1_day_old
TTTCGTCA_GGGCTTGG_GTCCTTCG_CCATTGTG	103	120	0.858333	1_day_old
TTTCGTCA_GGCACGGA_GTTATCCG_GTCACGTC	2856	3326	0.858689	1_day_old
TTTCGTCA_GGCACGGA_GTCCTTCG_TGCGAAGT	259	306	0.846405	1_day_old
TTTCGTCA_GGCACGGA_GTCCTTCG_GCGGTTAA	817	915	0.892896	1_day_old
TTTCGTCA_GGCACGGA_GTCCTTCG_AATAACGT	291	334	0.871257	1_day_old
TTTCGTCA_GCATTAAG_TAACGATT_TGCGAAGT	485	547	0.886654	1_day_old
TTTCGTCA_GCATTAAG_CGAGCGCT_GCGGTTAA	6304	7500	0.840533	1_day_old
TTTCGTCA_GCAGCCTC_GTCCTTCG_CGGCGACA	2007	2291	0.876037	1_day_old
TTTCGTCA_GCAGCCTC_GTCCTTCG_AATTCTAA	584	674	0.866469	1_day_old
TTTCGTCA_GCAGCCTC_CGAGCGCT_TTACGCCG	4709	5397	0.872522	1_day_old
TTTCGTCA_GCAGCCTC_AAGGAATC_TTACGCCG	528	598	0.882943	1_day_old
TTTCGTCA_GCAAATTT_GTCCTTCG_AATAACGT	1738	1960	0.886735	1_day_old
TTTCGTCA_GCAAATTT_AAGGAATC_CCATTGTG	1723	1959	0.87953	1_day_old
TTTCGTCA_GATCATTC_TCGACCGA_TTACGCCG	1754	2246	0.780944	1_day_old
TTTCGTCA_GATCATTC_TAACGATT_AATTCTAA	246	286	0.86014	1_day_old
TTTCGTCA_GATCATTC_ATGTAGAC_AATAACGT	1537	1784	0.861547	1_day_old
TTTCGTCA_GAGACGTG_TAACGATT_GTCACGTC	500	582	0.859107	1_day_old
TTTCGTCA_GAGACGTG_TAACGATT_CGGCGACA	268	293	0.914676	1_day_old
TTTCGTCA_GAGACGTG_TAACGATT_CCATTGTG	317	350	0.905714	1_day_old
TTTCGTCA_GAGACGTG_ATGTAGAC_AATTCTAA	101	112	0.901786	1_day_old
TTTCGTCA_GAGACGTG_AAGGAATC_GCGGTTAA	742	852	0.870892	1_day_old
TTTCGTCA_GACGTGGC_ATGTAGAC_AATTCTAA	680	755	0.900662	1_day_old
TTTCGTCA_GACGTGGC_ATGTAGAC_AATAACGT	1062	1243	0.854385	1_day_old
TTTCGTCA_GACGTGGC_AAGGAATC_GCGGTTAA	1022	1171	0.872758	1_day_old
TTTCGTCA_CTTTAACA_ATGTAGAC_CCATTGTG	631	692	0.91185	1_day_old
TTTCGTCA_CTTTAACA_AAGGAATC_GTCACGTC	1730	2076	0.833333	1_day_old
TTTCGTCA_CTTTAACA_AAGGAATC_CGGCGACA	788	907	0.868798	1_day_old
TTTCGTCA_CTTTAACA_AAGGAATC_AATAACGT	2393	2837	0.843497	1_day_old
TTTCGTCA_CTTTAACA_AAGGAATC_AATAACGT	742	836	0.88756	1_day_old
TTTCGTCA_CTCTCTAT_GTCCTTCG_TGCGAAGT	1371	1568	0.874362	1_day_old
TTTCGTCA_CTAGAAGT_AAGGAATC_TTACGCCG	117	131	0.89313	1_day_old
TTTCGTCA_CTAGAAGT_AAGGAATC_CCATTGTG	156	182	0.857143	1_day_old
TTTCGTCA_CTAGAAGT_AAGGAATC_AATTCTAA	130	149	0.872483	1_day_old
TTTCGTCA_CTAAGCCT_GTCCTTCG_CGGCGACA	140	164	0.853659	1_day_old
TTTCGTCA_CTAAGCCT_CGAGCGCT_TGCGAAGT	6506	7611	0.854815	1_day_old
TTTCGTCA_CTAAGCCT_CGAGCGCT_AATTCTAA	4177	4878	0.856294	1_day_old
TTTCGTCA_CGTAGACC_GTCCTTCG_GCGGTTAA	1285	1449	0.886818	1_day_old
TTTCGTCA_CGTAGACC_GTCCTTCG_CGGCGACA	463	524	0.883588	1_day_old
TTTCGTCA_CGTAGACC_ATGTAGAC_CGGCGACA	95	101	0.940594	1_day_old
TTTCGTCA_CGTAGACC_AAGGAATC_GCGGTTAA	104	123	0.845528	1_day_old
TTTCGTCA_CGTACCAA_TAACGATT_CGGCGACA	166	198	0.838384	1_day_old
TTTCGTCA_CGTACCAA_GTCCTTCG_GTCACGTC	592	673	0.879643	1_day_old
TTTCGTCA_CGTACCAA_GTCCTTCG_GTCACGTC	121	137	0.883212	1_day_old
TTTCGTCA_CGTACCAA_ATGTAGAC_CGGCGACA	187	203	0.921182	1_day_old
TTTCGTCA_CGTACCAA_AAGGAATC_CCATTGTG	160	178	0.898876	1_day_old
TTTCGTCA_CGGACTGC_TCGACCGA_AATAACGT	2348	2754	0.852578	1_day_old
TTTCGTCA_CGGACTGC_TAACGATT_TTACGCCG	1643	1886	0.871156	1_day_old
TTTCGTCA_CGGACTGC_GTCCTTCG_CGGCGACA	905	1038	0.871869	1_day_old
TTTCGTCA_CGGACTGC_GTCCTTCG_AATAACGT	108	127	0.850394	1_day_old
TTTCGTCA_CGGACTGC_GTCCTTCG_AATAACGT	403	470	0.857447	1_day_old
TTTCGTCA_CGGACTGC_AAGGAATC_TTACGCCG	275	320	0.859375	1_day_old
TTTCGTCA_CGCCAGAT_TAACGATT_AATAACGT	274	323	0.848297	1_day_old
TTTCGTCA_CGATAGGG_CGAGCGCT_CGGCGACA	3744	4260	0.878873	1_day_old
TTTCGTCA_CGATAGGG_ATGTAGAC_GTCACGTC	772	873	0.884307	1_day_old
TTTCGTCA_CCTTATGT_TAACGATT_GTCACGTC	89	101	0.881188	1_day_old
TTTCGTCA_CCTTATGT_TAACGATT_GTCACGTC	361	390	0.925641	1_day_old
TTTCGTCA_CCTTATGT_GTCCTTCG_TTACGCCG	890	1013	0.878578	1_day_old
TTTCGTCA_CCTTATGT_AAGGAATC_AATTCTAA	184	218	0.844037	1_day_old
TTTCGTCA_CCTGCGGG_TAACGATT_GTCACGTC	546	626	0.872204	1_day_old
TTTCGTCA_CCTGCGGG_GTCCTTCG_TTACGCCG	206	241	0.854772	1_day_old
TTTCGTCA_CCTGCGGG_ATGTAGAC_GCGGTTAA	881	1010	0.872277	1_day_old
TTTCGTCA_CCTGCGGG_AAGGAATC_CCATTGTG	566	627	0.902711	1_day_old
TTTCGTCA_CCCTTGGA_GTTATCCG_GTCACGTC	7646	8935	0.855736	1_day_old
TTTCGTCA_CCCTTGGA_CATTGTGG_GTCACGTC	2683	3046	0.880827	1_day_old
TTTCGTCA_CCCTTGGA_CATTGTGG_AATTCTAA	3962	4637	0.854432	1_day_old
TTTCGTCA_CCCTTGGA_ATGTAGAC_GTCACGTC	203	232	0.875	1_day_old
TTTCGTCA_CCCTTGGA_AAGGAATC_TTACGCCG	2955	3416	0.865047	1_day_old
TTTCGTCA_CCAGTTTA_AAGGAATC_CCATTGTG	3594	4152	0.865607	1_day_old
TTTCGTCA_CCACCGTT_ATGTAGAC_GTCACGTC	541	597	0.906198	1_day_old
TTTCGTCA_ATTACCGT_TAACGATT_GTCACGTC	436	503	0.866799	1_day_old
TTTCGTCA_ATTACCGT_GTCCTTCG_AATTCTAA	142	165	0.860606	1_day_old
TTTCGTCA_ATTACCGT_ATGTAGAC_TGCGAAGT	817	930	0.878495	1_day_old
TTTCGTCA_ATTACCGT_ATGTAGAC_AATTCTAA	1020	1166	0.874786	1_day_old
TTTCGTCA_ATTACCGT_AAGGAATC_AATTCTAA	260	311	0.836013	1_day_old
TTTCGTCA_ATTACCGT_AAGGAATC_AATAACGT	1137	1288	0.882764	1_day_old
TTTCGTCA_ATGGTCAT_GTCCTTCG_CGGCGACA	308	361	0.853186	1_day_old
TTTCGTCA_ATGGTCAT_AAGGAATC_GTCACGTC	230	265	0.867925	1_day_old
TTTCGTCA_ATGGTCAT_AAGGAATC_AATTCTAA	1563	1779	0.878583	1_day_old
TTTCGTCA_ATCCAGGA_TAACGATT_CCATTGTG	359	409	0.877751	1_day_old
TTTCGTCA_ATCCAGGA_GTCCTTCG_GCGGTTAA	804	908	0.885463	1_day_old
TTTCGTCA_ATCCAGGA_GTCCTTCG_CGGCGACA	163	185	0.881081	1_day_old
TTTCGTCA_ATCCAGGA_AAGGAATC_TTACGCCG	132	146	0.90411	1_day_old
TTTCGTCA_AGTCCGAG_ATGTAGAC_GTCACGTC	472	538	0.877323	1_day_old
TTTCGTCA_AGTCCGAG_ATGTAGAC_GCGGTTAA	171	188	0.909574	1_day_old
TTTCGTCA_AGTCCGAG_AAGGAATC_TGCGAAGT	225	254	0.885827	1_day_old
TTTCGTCA_AGCCGTTC_AAGGAATC_CGGCGACA	909	1004	0.905378	1_day_old
TTTCGTCA_AGAGTAGA_TAACGATT_AATAACGT	251	285	0.880702	1_day_old
TTTCGTCA_AGAGTAGA_GTCCTTCG_AATAACGT	712	820	0.868293	1_day_old
TTTCGTCA_AGAGTAGA_AAGGAATC_CGGCGACA	496	563	0.880995	1_day_old
TTTCGTCA_AGAGATCT_TAACGATT_GCGGTTAA	226	245	0.922449	1_day_old
TTTCGTCA_ACTTGTTG_TAACGATT_AATTCTAA	1013	1176	0.861395	1_day_old
TTTCGTCA_ACTTGTTG_GTCCTTCG_TTACGCCG	1155	1350	0.855556	1_day_old
TTTCGTCA_ACTTGTTG_AAGGAATC_AATTCTAA	291	324	0.898148	1_day_old
TTTCGTCA_ACTTAGAA_GTCCTTCG_TTACGCCG	165	198	0.833333	1_day_old
TTTCGTCA_ACTTAGAA_GTCCTTCG_CGGCGACA	635	737	0.861601	1_day_old
TTTCGTCA_ACTTAGAA_ATGTAGAC_CCATTGTG	158	179	0.882682	1_day_old
TTTCGTCA_ACTGCATA_TAACGATT_TGCGAAGT	240	275	0.872727	1_day_old
TTTCGTCA_ACTGCATA_TAACGATT_AATAACGT	788	864	0.912037	1_day_old
TTTCGTCA_ACTGCATA_GTTATCCG_TGCGAAGT	1090	1292	0.843653	1_day_old
TTTCGTCA_ACTGCATA_CATTGTGG_GCGGTTAA	2858	3324	0.859807	1_day_old
TTTCGTCA_ACTGCATA_AAGGAATC_CCATTGTG	1371	1562	0.877721	1_day_old
TTTCGTCA_ACGATAAC_GTCCTTCG_TGCGAAGT	600	685	0.875912	1_day_old
TTTCGTCA_ACCGGCCC_GTCCTTCG_CGGCGACA	1285	1465	0.877133	1_day_old
TTTCGTCA_ACCGGCCC_GTCCTTCG_CCATTGTG	3791	4359	0.869695	1_day_old
TTTCGTCA_ACCGGCCC_ATGTAGAC_CCATTGTG	381	436	0.873853	1_day_old
TTTCGTCA_ACCGGCCC_ATGTAGAC_AATTCTAA	103	128	0.804688	1_day_old
TTTCGTCA_ACATTCGT_TAACGATT_GTCACGTC	123	137	0.89781	1_day_old
TTTCGTCA_ACATTCGT_TAACGATT_AATAACGT	2527	2869	0.880795	1_day_old
TTTCGTCA_ACATTCGT_GTTATCCG_GTCACGTC	4303	4913	0.87584	1_day_old
TTTCGTCA_ACATTCGT_ATGTAGAC_TTACGCCG	236	272	0.867647	1_day_old
TTTCGTCA_AAGGAGTA_AAGGAATC_TTACGCCG	696	802	0.86783	1_day_old
TTTCGTCA_AAGGAGTA_AAGGAATC_TTACGCCG	1894	2155	0.878886	1_day_old
TTTAATGC_TTGCCTAA_TAACGATT_GTCACGTC	182	207	0.879227	1_day_old
TTTAATGC_TTGCCTAA_GTTATCCG_GTCACGTC	734	856	0.857477	1_day_old
TTTAATGC_TTGCCTAA_CGAGCGCT_GTCACGTC	1910	2202	0.867393	1_day_old
TTTAATGC_TTGCCTAA_CATTGTGG_CGGCGACA	744	852	0.873239	1_day_old
TTTAATGC_TTGCCTAA_ATGTAGAC_CGGCGACA	1371	1547	0.886231	1_day_old
TTTAATGC_TTCGTGCA_TAACGATT_CCATTGTG	303	354	0.855932	1_day_old
TTTAATGC_TTCGTGCA_GTCCTTCG_CGGCGACA	591	656	0.900915	1_day_old
TTTAATGC_TTAACTTG_TAACGATT_TGCGAAGT	180	200	0.9	1_day_old
TTTAATGC_TTAACTTG_GTTATCCG_TGCGAAGT	4038	4644	0.869509	1_day_old
TTTAATGC_TTAACTTG_GTTATCCG_AATTCTAA	2887	3275	0.881527	1_day_old
TTTAATGC_TTAACTTG_ATGTAGAC_AATAACGT	1554	1722	0.902439	1_day_old
TTTAATGC_TTAACTTG_AAGGAATC_CGGCGACA	2751	3365	0.817533	1_day_old
TTTAATGC_TGTTCCTG_GTTATCCG_TGCGAAGT	2320	2816	0.823864	1_day_old
TTTAATGC_TGTTCCTG_GTTATCCG_GCGGTTAA	99	118	0.838983	1_day_old
TTTAATGC_TGTTCCTG_GTCCTTCG_CGGCGACA	114	126	0.904762	1_day_old
TTTAATGC_TGTTCCTG_ATGTAGAC_TTACGCCG	209	253	0.826087	1_day_old
TTTAATGC_TGTTCCTG_AAGGAATC_CCATTGTG	206	246	0.837398	1_day_old
TTTAATGC_TGGGCGGT_GTCCTTCG_CGGCGACA	388	450	0.862222	1_day_old
TTTAATGC_TGGGCGGT_GTCCTTCG_CGGCGACA	145	157	0.923567	1_day_old
TTTAATGC_TGGGCGGT_AAGGAATC_AATTCTAA	1208	1374	0.879185	1_day_old
TTTAATGC_TGGAAATC_TAACGATT_AATTCTAA	898	1005	0.893532	1_day_old
TTTAATGC_TGGAAATC_GTTATCCG_CCATTGTG	2746	3121	0.879846	1_day_old
TTTAATGC_TGGAAATC_ATGTAGAC_GTCACGTC	134	145	0.924138	1_day_old
TTTAATGC_TGGAAATC_AAGGAATC_CCATTGTG	238	269	0.884758	1_day_old
TTTAATGC_TGCATACT_GTCCTTCG_GTCACGTC	186	224	0.830357	1_day_old
TTTAATGC_TGCATACT_GTCCTTCG_GTCACGTC	383	441	0.868481	1_day_old
TTTAATGC_TGCATACT_GTCCTTCG_GCGGTTAA	1549	1727	0.896931	1_day_old
TTTAATGC_TGCATACT_CATTGTGG_CGGCGACA	104	119	0.87395	1_day_old
TTTAATGC_TGCATACT_CATTGTGG_AATAACGT	2819	3307	0.852434	1_day_old
TTTAATGC_TGCATACT_AAGGAATC_GTCACGTC	132	147	0.897959	1_day_old
TTTAATGC_TGCATACT_AAGGAATC_GCGGTTAA	1593	1841	0.865291	1_day_old
TTTAATGC_TGCATACT_AAGGAATC_CGGCGACA	392	469	0.835821	1_day_old
TTTAATGC_TGATTGTT_TAACGATT_TGCGAAGT	437	493	0.88641	1_day_old
TTTAATGC_TGATTGTT_GTCCTTCG_CCATTGTG	103	114	0.903509	1_day_old
TTTAATGC_TGATTGTT_ATGTAGAC_GTCACGTC	163	196	0.831633	1_day_old
TTTAATGC_TGATTGTT_ATGTAGAC_CCATTGTG	351	392	0.895408	1_day_old
TTTAATGC_TGATGAAA_TAACGATT_TTACGCCG	652	736	0.88587	1_day_old
TTTAATGC_TGATGAAA_TAACGATT_TGCGAAGT	617	728	0.847527	1_day_old
TTTAATGC_TGATGAAA_TAACGATT_GCGGTTAA	252	285	0.884211	1_day_old
TTTAATGC_TCTGGCGA_TAACGATT_CCATTGTG	3057	3524	0.86748	1_day_old
TTTAATGC_TCTGGCGA_TAACGATT_CCATTGTG	622	713	0.87237	1_day_old
TTTAATGC_TCTGGCGA_GTCCTTCG_TTACGCCG	94	101	0.930693	1_day_old
TTTAATGC_TCTGGCGA_ATGTAGAC_TTACGCCG	583	645	0.903876	1_day_old
TTTAATGC_TCTGGCGA_AAGGAATC_GCGGTTAA	382	437	0.874142	1_day_old
TTTAATGC_TCTGGCGA_AAGGAATC_CGGCGACA	849	953	0.890871	1_day_old
TTTAATGC_TCTGGCGA_AAGGAATC_CCATTGTG	889	1017	0.87414	1_day_old
TTTAATGC_TCTGGCGA_AAGGAATC_CCATTGTG	530	598	0.886288	1_day_old
TTTAATGC_TCCGAGTT_GTTATCCG_GTCACGTC	3558	4196	0.84795	1_day_old
TTTAATGC_TCCGAGTT_GTCCTTCG_TTACGCCG	1132	1257	0.900557	1_day_old
TTTAATGC_TCCGAGTT_GTCCTTCG_AATAACGT	1713	1943	0.881626	1_day_old
TTTAATGC_TCCGAGTT_AAGGAATC_CCATTGTG	1381	1588	0.869647	1_day_old
TTTAATGC_TCCATCAA_GTCCTTCG_GCGGTTAA	222	261	0.850575	1_day_old
TTTAATGC_TCCATCAA_GTCCTTCG_AATAACGT	1885	2162	0.871878	1_day_old
TTTAATGC_TCACATGG_TCGACCGA_GCGGTTAA	4784	5549	0.862137	1_day_old
TTTAATGC_TCACATGG_TAACGATT_GTCACGTC	141	165	0.854545	1_day_old
TTTAATGC_TCACATGG_TAACGATT_GCGGTTAA	621	723	0.858921	1_day_old
TTTAATGC_TCAAGAGC_TAACGATT_CCATTGTG	116	137	0.846715	1_day_old
TTTAATGC_TCAAGAGC_TAACGATT_CCATTGTG	777	898	0.865256	1_day_old
TTTAATGC_TCAAGAGC_GTCCTTCG_AATAACGT	1861	2150	0.865581	1_day_old
TTTAATGC_TCAAGAGC_AAGGAATC_CGGCGACA	217	241	0.900415	1_day_old
TTTAATGC_TCAAGAGC_AAGGAATC_CCATTGTG	690	781	0.883483	1_day_old
TTTAATGC_TATTTGCG_TAACGATT_GTCACGTC	375	427	0.87822	1_day_old
TTTAATGC_TATTTGCG_CGAGCGCT_GCGGTTAA	2781	3205	0.867707	1_day_old
TTTAATGC_TATTTGCG_ATGTAGAC_CGGCGACA	980	1092	0.897436	1_day_old
TTTAATGC_TATCCTCT_GTTATCCG_TTACGCCG	2345	2756	0.850871	1_day_old
TTTAATGC_TATCCTCT_ATGTAGAC_AATTCTAA	1994	2292	0.869983	1_day_old
TTTAATGC_TATCCTCT_AAGGAATC_CGGCGACA	380	470	0.808511	1_day_old
TTTAATGC_TACTGACC_GTCCTTCG_TTACGCCG	5805	6537	0.888022	1_day_old
TTTAATGC_TACTGACC_CGAGCGCT_TTACGCCG	2434	2763	0.880927	1_day_old
TTTAATGC_TAAGTTAC_TAACGATT_CCATTGTG	227	273	0.831502	1_day_old
TTTAATGC_TAAGTTAC_GTCCTTCG_AATTCTAA	102	108	0.944444	1_day_old
TTTAATGC_TAAGTTAC_AAGGAATC_TGCGAAGT	2298	2628	0.874429	1_day_old
TTTAATGC_TAACCAAG_ATGTAGAC_TTACGCCG	505	568	0.889085	1_day_old
TTTAATGC_TAACCAAG_AAGGAATC_TGCGAAGT	417	486	0.858025	1_day_old
TTTAATGC_TAACCAAG_AAGGAATC_GTCACGTC	1744	2005	0.869825	1_day_old
TTTAATGC_GTGTATCG_GTTATCCG_CGGCGACA	105	124	0.846774	1_day_old
TTTAATGC_GTGTATCG_GTCCTTCG_GTCACGTC	213	242	0.880165	1_day_old
TTTAATGC_GTGTATCG_AAGGAATC_TGCGAAGT	532	615	0.865041	1_day_old
TTTAATGC_GGTTCAAT_TAACGATT_TGCGAAGT	134	151	0.887417	1_day_old
TTTAATGC_GGTTCAAT_TAACGATT_CGGCGACA	157	185	0.848649	1_day_old
TTTAATGC_GGTTCAAT_AAGGAATC_CCATTGTG	1184	1377	0.85984	1_day_old
TTTAATGC_GGTGAAGG_GTCCTTCG_AATAACGT	2429	2755	0.88167	1_day_old
TTTAATGC_GGTGAAGG_ATGTAGAC_GTCACGTC	817	932	0.876609	1_day_old
TTTAATGC_GGTGAAGG_AAGGAATC_TGCGAAGT	317	371	0.854447	1_day_old
TTTAATGC_GGGCTTGG_GTCCTTCG_TGCGAAGT	300	333	0.900901	1_day_old
TTTAATGC_GGGCTTGG_GTCCTTCG_CGGCGACA	115	135	0.851852	1_day_old
TTTAATGC_GGGCTTGG_GTCCTTCG_CCATTGTG	154	176	0.875	1_day_old
TTTAATGC_GGCACGGA_TCGACCGA_GTCACGTC	2765	3285	0.841705	1_day_old
TTTAATGC_GGCACGGA_TAACGATT_AATTCTAA	1380	1543	0.894362	1_day_old
TTTAATGC_GGCACGGA_ATGTAGAC_CCATTGTG	2980	3403	0.875698	1_day_old
TTTAATGC_GGCACGGA_ATGTAGAC_AATAACGT	523	594	0.880471	1_day_old
TTTAATGC_GCCCACGT_GTCCTTCG_GTCACGTC	95	112	0.848214	1_day_old
TTTAATGC_GCCCACGT_GTCCTTCG_CGGCGACA	708	834	0.848921	1_day_old
TTTAATGC_GCATTAAG_GTCCTTCG_GTCACGTC	218	256	0.851562	1_day_old
TTTAATGC_GCATTAAG_GTCCTTCG_AATTCTAA	169	202	0.836634	1_day_old
TTTAATGC_GCAGCCTC_ATGTAGAC_GTCACGTC	113	122	0.92623	1_day_old
TTTAATGC_GCAAATTT_TAACGATT_CCATTGTG	1255	1452	0.864325	1_day_old
TTTAATGC_GCAAATTT_TAACGATT_AATTCTAA	100	116	0.862069	1_day_old
TTTAATGC_GCAAATTT_GTCCTTCG_TTACGCCG	150	176	0.852273	1_day_old
TTTAATGC_GCAAATTT_GTCCTTCG_CGGCGACA	1438	1621	0.887107	1_day_old
TTTAATGC_GCAAATTT_ATGTAGAC_TTACGCCG	274	313	0.875399	1_day_old
TTTAATGC_GCAAATTT_AAGGAATC_GTCACGTC	101	121	0.834711	1_day_old
TTTAATGC_GATTCCCA_GTTATCCG_CGGCGACA	215	255	0.843137	1_day_old
TTTAATGC_GATTCCCA_GTCCTTCG_GTCACGTC	456	527	0.865275	1_day_old
TTTAATGC_GATCATTC_CGAGCGCT_CGGCGACA	2086	2455	0.849695	1_day_old
TTTAATGC_GATCATTC_ATGTAGAC_TGCGAAGT	368	416	0.884615	1_day_old
TTTAATGC_GATCATTC_ATGTAGAC_CGGCGACA	1106	1245	0.888353	1_day_old
TTTAATGC_GATCATTC_AAGGAATC_GCGGTTAA	1563	1824	0.856908	1_day_old
TTTAATGC_GAGACGTG_TAACGATT_TTACGCCG	99	120	0.825	1_day_old
TTTAATGC_GAGACGTG_GTCCTTCG_TTACGCCG	856	994	0.861167	1_day_old
TTTAATGC_GAGACGTG_ATGTAGAC_AATAACGT	246	284	0.866197	1_day_old
TTTAATGC_GACGTGGC_GTCCTTCG_CCATTGTG	435	499	0.871743	1_day_old
TTTAATGC_GACGTGGC_GTCCTTCG_AATTCTAA	1511	1713	0.882078	1_day_old
TTTAATGC_GACGTGGC_AAGGAATC_CCATTGTG	2047	2263	0.904551	1_day_old
TTTAATGC_GAACTCGA_TAACGATT_CCATTGTG	477	527	0.905123	1_day_old
TTTAATGC_GAACTCGA_ATGTAGAC_GTCACGTC	1356	1572	0.862595	1_day_old
TTTAATGC_CTTTAACA_TAACGATT_GCGGTTAA	705	841	0.838288	1_day_old
TTTAATGC_CTTTAACA_GTCCTTCG_AATAACGT	1342	1516	0.885224	1_day_old
TTTAATGC_CTCTCTAT_TAACGATT_TTACGCCG	2059	2290	0.899127	1_day_old
TTTAATGC_CTCTCTAT_TAACGATT_AATAACGT	111	124	0.895161	1_day_old
TTTAATGC_CTCTCTAT_GTCCTTCG_TTACGCCG	175	192	0.911458	1_day_old
TTTAATGC_CTCTCTAT_GTCCTTCG_GTCACGTC	133	147	0.904762	1_day_old
TTTAATGC_CTAGAAGT_GTCCTTCG_GTCACGTC	361	416	0.867788	1_day_old
TTTAATGC_CTAGAAGT_AAGGAATC_AATTCTAA	3682	4138	0.889802	1_day_old
TTTAATGC_CTAAGCCT_GTCCTTCG_AATAACGT	682	775	0.88	1_day_old
TTTAATGC_CGTAGACC_CATTGTGG_GCGGTTAA	1151	1290	0.892248	1_day_old
TTTAATGC_CGTACCAA_GTCCTTCG_CCATTGTG	157	172	0.912791	1_day_old
TTTAATGC_CGTACCAA_ATGTAGAC_GTCACGTC	442	517	0.854932	1_day_old
TTTAATGC_CGTACCAA_AAGGAATC_TGCGAAGT	122	139	0.877698	1_day_old
TTTAATGC_CGGACTGC_TAACGATT_GTCACGTC	958	1101	0.870118	1_day_old
TTTAATGC_CGGACTGC_GTCCTTCG_CGGCGACA	240	280	0.857143	1_day_old
TTTAATGC_CGCCAGAT_TAACGATT_AATTCTAA	504	582	0.865979	1_day_old
TTTAATGC_CGCCAGAT_GTTATCCG_GTCACGTC	1344	1535	0.87557	1_day_old
TTTAATGC_CGCCAGAT_GTCCTTCG_CGGCGACA	2556	2901	0.881075	1_day_old
TTTAATGC_CGCCAGAT_ATGTAGAC_TTACGCCG	250	289	0.865052	1_day_old
TTTAATGC_CGATAGGG_TAACGATT_TGCGAAGT	205	228	0.899123	1_day_old
TTTAATGC_CGATAGGG_GTCCTTCG_CGGCGACA	796	912	0.872807	1_day_old
TTTAATGC_CGATAGGG_ATGTAGAC_TTACGCCG	353	430	0.82093	1_day_old
TTTAATGC_CCTTATGT_GTCCTTCG_TTACGCCG	668	725	0.921379	1_day_old
TTTAATGC_CCTTATGT_ATGTAGAC_TTACGCCG	2148	2434	0.882498	1_day_old
TTTAATGC_CCTTATGT_ATGTAGAC_TGCGAAGT	493	546	0.90293	1_day_old
TTTAATGC_CCTTATGT_AAGGAATC_GCGGTTAA	964	1072	0.899254	1_day_old
TTTAATGC_CCTGCGGG_GTTATCCG_CGGCGACA	257	297	0.86532	1_day_old
TTTAATGC_CCTGCGGG_GTCCTTCG_GTCACGTC	512	601	0.851913	1_day_old
TTTAATGC_CCCTTGGA_TCGACCGA_GTCACGTC	1019	1176	0.866497	1_day_old
TTTAATGC_CCCTTGGA_GTCCTTCG_AATTCTAA	122	149	0.818792	1_day_old
TTTAATGC_CCCTTGGA_ATGTAGAC_TTACGCCG	1038	1151	0.901825	1_day_old
TTTAATGC_CCCTTGGA_AAGGAATC_TTACGCCG	304	353	0.86119	1_day_old
TTTAATGC_CCCTTGGA_AAGGAATC_AATAACGT	374	416	0.899038	1_day_old
TTTAATGC_CCAGTTTA_AAGGAATC_AATTCTAA	1720	1943	0.885229	1_day_old
TTTAATGC_CCACCGTT_GTTATCCG_CGGCGACA	161	186	0.865591	1_day_old
TTTAATGC_CCACCGTT_GTCCTTCG_GTCACGTC	415	479	0.866388	1_day_old
TTTAATGC_CCACCGTT_GTCCTTCG_GTCACGTC	1667	1875	0.889067	1_day_old
TTTAATGC_CCACCGTT_ATGTAGAC_CGGCGACA	750	844	0.888626	1_day_old
TTTAATGC_CCACCGTT_AAGGAATC_AATAACGT	940	1098	0.856102	1_day_old
TTTAATGC_CAGCAACG_TAACGATT_AATAACGT	1502	1772	0.84763	1_day_old
TTTAATGC_CAGCAACG_GTCCTTCG_TTACGCCG	1102	1261	0.87391	1_day_old
TTTAATGC_CAGCAACG_GTCCTTCG_TGCGAAGT	118	150	0.786667	1_day_old
TTTAATGC_CAGCAACG_ATGTAGAC_AATAACGT	679	776	0.875	1_day_old
TTTAATGC_CAGCAACG_AAGGAATC_TGCGAAGT	538	611	0.880524	1_day_old
TTTAATGC_CAGCAACG_AAGGAATC_GCGGTTAA	159	193	0.823834	1_day_old
TTTAATGC_ATTGGGTC_AAGGAATC_GCGGTTAA	179	200	0.895	1_day_old
TTTAATGC_ATTGGGTC_AAGGAATC_AATTCTAA	1499	1659	0.903556	1_day_old
TTTAATGC_ATTACCGT_AAGGAATC_GCGGTTAA	116	137	0.846715	1_day_old
TTTAATGC_ATGGTCAT_TAACGATT_AATAACGT	636	690	0.921739	1_day_old
TTTAATGC_ATGGTCAT_GTCCTTCG_GTCACGTC	180	203	0.8867	1_day_old
TTTAATGC_ATGGTCAT_GTCCTTCG_CGGCGACA	1622	1890	0.858201	1_day_old
TTTAATGC_ATGGTCAT_CATTGTGG_TTACGCCG	1750	2071	0.845002	1_day_old
TTTAATGC_ATGGTCAT_AAGGAATC_GCGGTTAA	574	664	0.864458	1_day_old
TTTAATGC_ATGGTCAT_AAGGAATC_AATAACGT	270	315	0.857143	1_day_old
TTTAATGC_ATCGAATG_GTTATCCG_CCATTGTG	1268	1479	0.857336	1_day_old
TTTAATGC_ATCGAATG_CATTGTGG_CGGCGACA	1938	2298	0.843342	1_day_old
TTTAATGC_ATCGAATG_ATGTAGAC_GTCACGTC	200	227	0.881057	1_day_old
TTTAATGC_ATCGAATG_ATGTAGAC_CCATTGTG	409	466	0.877682	1_day_old
TTTAATGC_ATCGAATG_AAGGAATC_AATTCTAA	120	138	0.869565	1_day_old
TTTAATGC_ATCCAGGA_GTCCTTCG_GTCACGTC	108	126	0.857143	1_day_old
TTTAATGC_ATCCAGGA_GTCCTTCG_AATAACGT	857	975	0.878974	1_day_old
TTTAATGC_ATCCAGGA_ATGTAGAC_AATAACGT	1909	2147	0.889148	1_day_old
TTTAATGC_ATCCAGGA_AAGGAATC_AATTCTAA	956	1117	0.855864	1_day_old
TTTAATGC_AGGTTGCC_TCGACCGA_AATAACGT	3235	3680	0.879076	1_day_old
TTTAATGC_AGGTTGCC_TAACGATT_TGCGAAGT	200	227	0.881057	1_day_old
TTTAATGC_AGGTTGCC_GTTATCCG_CGGCGACA	1248	1438	0.867872	1_day_old
TTTAATGC_AGGTTGCC_GTCCTTCG_GCGGTTAA	398	442	0.900452	1_day_old
TTTAATGC_AGGTTGCC_GTCCTTCG_CCATTGTG	1120	1344	0.833333	1_day_old
TTTAATGC_AGCCGTTC_GTCCTTCG_AATTCTAA	422	498	0.84739	1_day_old
TTTAATGC_AGAGATCT_TAACGATT_TTACGCCG	680	782	0.869565	1_day_old
TTTAATGC_AGAGATCT_TAACGATT_CCATTGTG	624	693	0.900433	1_day_old
TTTAATGC_AGAGATCT_GTCCTTCG_AATAACGT	202	227	0.889868	1_day_old
TTTAATGC_ACTTGTTG_TAACGATT_TTACGCCG	237	274	0.864964	1_day_old
TTTAATGC_ACTTGTTG_GTCCTTCG_GTCACGTC	113	128	0.882812	1_day_old
TTTAATGC_ACTTGTTG_AAGGAATC_GTCACGTC	1485	1725	0.86087	1_day_old
TTTAATGC_ACTTGTTG_AAGGAATC_CGGCGACA	892	1025	0.870244	1_day_old
TTTAATGC_ACTTAGAA_GTCCTTCG_GCGGTTAA	180	218	0.825688	1_day_old
TTTAATGC_ACTTAGAA_ATGTAGAC_GTCACGTC	139	165	0.842424	1_day_old
TTTAATGC_ACTTAGAA_AAGGAATC_CCATTGTG	1170	1330	0.879699	1_day_old
TTTAATGC_ACTGCATA_GTCCTTCG_AATAACGT	157	188	0.835106	1_day_old
TTTAATGC_ACGCGCAG_AAGGAATC_AATAACGT	897	1003	0.894317	1_day_old
TTTAATGC_ACGATAAC_GTCCTTCG_CCATTGTG	834	964	0.865145	1_day_old
TTTAATGC_ACGATAAC_GTCCTTCG_AATTCTAA	304	356	0.853933	1_day_old
TTTAATGC_ACGATAAC_AAGGAATC_TTACGCCG	123	134	0.91791	1_day_old
TTTAATGC_ACGATAAC_AAGGAATC_TGCGAAGT	303	357	0.848739	1_day_old
TTTAATGC_ACCGGCCC_GTCCTTCG_GCGGTTAA	738	813	0.907749	1_day_old
TTTAATGC_ACCGGCCC_ATGTAGAC_TTACGCCG	1399	1604	0.872195	1_day_old
TTTAATGC_ACCGGCCC_AAGGAATC_AATAACGT	647	744	0.869624	1_day_old
TTTAATGC_ACATTCGT_TAACGATT_CGGCGACA	380	438	0.86758	1_day_old
TTTAATGC_ACATTCGT_CGAGCGCT_CCATTGTG	3236	3750	0.862933	1_day_old
TTTAATGC_ACATTCGT_AAGGAATC_CGGCGACA	106	126	0.84127	1_day_old
TTTAATGC_AATCTACA_TCGACCGA_CGGCGACA	2785	3315	0.840121	1_day_old
TTTAATGC_AATCTACA_CGAGCGCT_AATTCTAA	200	235	0.851064	1_day_old
TTTAATGC_AATCTACA_ATGTAGAC_AATAACGT	2794	3204	0.872035	1_day_old
TTTAATGC_AATCTACA_AAGGAATC_AATAACGT	597	693	0.861472	1_day_old
TTTAATGC_AAGGAGTA_GTTATCCG_TGCGAAGT	1238	1424	0.869382	1_day_old
TTTAATGC_AAGGAGTA_GTCCTTCG_AATAACGT	1769	1927	0.918007	1_day_old
TTTAATGC_AAGGAGTA_AAGGAATC_GTCACGTC	490	567	0.864198	1_day_old
TTTAATGC_AACATGAT_ATGTAGAC_GTCACGTC	2023	2264	0.893551	1_day_old
TTTAATGC_AACATGAT_AAGGAATC_AATTCTAA	641	720	0.890278	1_day_old
TTTAATGC_AACATGAT_AAGGAATC_AATAACGT	1321	1514	0.872523	1_day_old
TTGCTAAG_TTGCCTAA_TAACGATT_TTACGCCG	971	1074	0.904097	1_day_old
TTGCTAAG_TTGCCTAA_CGAGCGCT_GTCACGTC	2442	2775	0.88	1_day_old
TTGCTAAG_TTGCCTAA_AAGGAATC_CGGCGACA	1458	1647	0.885246	1_day_old
TTGCTAAG_TTCGTGCA_GTCCTTCG_CGGCGACA	616	698	0.882521	1_day_old
TTGCTAAG_TTCGTGCA_ATGTAGAC_GTCACGTC	1887	2140	0.881776	1_day_old
TTGCTAAG_TTCGTGCA_AAGGAATC_TGCGAAGT	114	139	0.820144	1_day_old
TTGCTAAG_TTAACTTG_TAACGATT_CCATTGTG	1298	1483	0.875253	1_day_old
TTGCTAAG_TTAACTTG_AAGGAATC_AATTCTAA	357	399	0.894737	1_day_old
TTGCTAAG_TGTTCCTG_GTCCTTCG_AATTCTAA	1345	1515	0.887789	1_day_old
TTGCTAAG_TGTTCCTG_AAGGAATC_TGCGAAGT	621	681	0.911894	1_day_old
TTGCTAAG_TGGGCGGT_TAACGATT_AATAACGT	543	617	0.880065	1_day_old
TTGCTAAG_TGGGCGGT_CATTGTGG_CGGCGACA	740	845	0.87574	1_day_old
TTGCTAAG_TGGAAATC_GTCCTTCG_CGGCGACA	1035	1179	0.877863	1_day_old
TTGCTAAG_TGGAAATC_GTCCTTCG_CCATTGTG	2790	3267	0.853994	1_day_old
TTGCTAAG_TGGAAATC_ATGTAGAC_AATTCTAA	1826	2090	0.873684	1_day_old
TTGCTAAG_TGGAAATC_ATGTAGAC_AATAACGT	176	197	0.893401	1_day_old
TTGCTAAG_TGGAAATC_AAGGAATC_AATTCTAA	902	1018	0.886051	1_day_old
TTGCTAAG_TGCATACT_GTCCTTCG_AATAACGT	1388	1580	0.878481	1_day_old
TTGCTAAG_TGCATACT_ATGTAGAC_AATTCTAA	154	186	0.827957	1_day_old
TTGCTAAG_TGCATACT_AAGGAATC_TGCGAAGT	1513	1718	0.880675	1_day_old
TTGCTAAG_TGCATACT_AAGGAATC_CCATTGTG	531	606	0.876238	1_day_old
TTGCTAAG_TGATTGTT_ATGTAGAC_CGGCGACA	395	446	0.88565	1_day_old
TTGCTAAG_TGATTGTT_AAGGAATC_CGGCGACA	1081	1246	0.867576	1_day_old
TTGCTAAG_TGATGAAA_ATGTAGAC_GTCACGTC	1419	1709	0.83031	1_day_old
TTGCTAAG_TGATGAAA_AAGGAATC_TTACGCCG	230	274	0.839416	1_day_old
TTGCTAAG_TCTGGCGA_ATGTAGAC_AATAACGT	139	163	0.852761	1_day_old
TTGCTAAG_TCTGGCGA_AAGGAATC_AATTCTAA	3510	3964	0.885469	1_day_old
TTGCTAAG_TCTGGCGA_AAGGAATC_AATAACGT	1870	2124	0.880414	1_day_old
TTGCTAAG_TCCGAGTT_TAACGATT_GCGGTTAA	1212	1388	0.873199	1_day_old
TTGCTAAG_TCCGAGTT_TAACGATT_CCATTGTG	181	209	0.866029	1_day_old
TTGCTAAG_TCCGAGTT_GTTATCCG_AATAACGT	4285	4876	0.878794	1_day_old
TTGCTAAG_TCCGAGTT_AAGGAATC_CCATTGTG	140	159	0.880503	1_day_old
TTGCTAAG_TCCGAGTT_AAGGAATC_AATAACGT	982	1132	0.867491	1_day_old
TTGCTAAG_TCCATCAA_TAACGATT_TTACGCCG	758	891	0.85073	1_day_old
TTGCTAAG_TCCATCAA_TAACGATT_CGGCGACA	268	302	0.887417	1_day_old
TTGCTAAG_TCACATGG_TAACGATT_GTCACGTC	348	373	0.932976	1_day_old
TTGCTAAG_TCACATGG_GTCCTTCG_TGCGAAGT	801	950	0.843158	1_day_old
TTGCTAAG_TCACATGG_GTCCTTCG_CCATTGTG	292	331	0.882175	1_day_old
TTGCTAAG_TCACATGG_AAGGAATC_TTACGCCG	242	269	0.899628	1_day_old
TTGCTAAG_TCAAGAGC_GTCCTTCG_GCGGTTAA	659	763	0.863696	1_day_old
TTGCTAAG_TCAAGAGC_AAGGAATC_GTCACGTC	952	1096	0.868613	1_day_old
TTGCTAAG_TCAAGAGC_AAGGAATC_GCGGTTAA	708	833	0.84994	1_day_old
TTGCTAAG_TATTTGCG_GTCCTTCG_TTACGCCG	611	694	0.880403	1_day_old
TTGCTAAG_TATCCTCT_TAACGATT_TGCGAAGT	391	476	0.821429	1_day_old
TTGCTAAG_TATCCTCT_TAACGATT_GCGGTTAA	99	112	0.883929	1_day_old
TTGCTAAG_TATCCTCT_AAGGAATC_TGCGAAGT	491	577	0.850953	1_day_old
TTGCTAAG_TAGATCGC_GTCCTTCG_AATAACGT	240	281	0.854093	1_day_old
TTGCTAAG_TAGATCGC_ATGTAGAC_GCGGTTAA	209	234	0.893162	1_day_old
TTGCTAAG_TACTGACC_GTTATCCG_GTCACGTC	1668	1908	0.874214	1_day_old
TTGCTAAG_TACTGACC_GTTATCCG_CCATTGTG	1362	1608	0.847015	1_day_old
TTGCTAAG_TACTGACC_GTCCTTCG_CGGCGACA	2873	3288	0.873783	1_day_old
TTGCTAAG_TACTGACC_ATGTAGAC_TTACGCCG	1423	1617	0.880025	1_day_old
TTGCTAAG_TACTGACC_ATGTAGAC_CGGCGACA	285	335	0.850746	1_day_old
TTGCTAAG_TACTGACC_ATGTAGAC_AATTCTAA	935	1060	0.882075	1_day_old
TTGCTAAG_TACTGACC_AAGGAATC_CCATTGTG	2109	2457	0.858364	1_day_old
TTGCTAAG_TAAGTTAC_GTCCTTCG_TGCGAAGT	108	114	0.947368	1_day_old
TTGCTAAG_TAAGTTAC_AAGGAATC_TTACGCCG	121	136	0.889706	1_day_old
TTGCTAAG_TAACCAAG_AAGGAATC_AATTCTAA	635	743	0.854643	1_day_old
TTGCTAAG_GTGTATCG_TAACGATT_TGCGAAGT	140	158	0.886076	1_day_old
TTGCTAAG_GTGTATCG_GTCCTTCG_GTCACGTC	948	1087	0.872125	1_day_old
TTGCTAAG_GTGTATCG_AAGGAATC_AATAACGT	799	893	0.894737	1_day_old
TTGCTAAG_GTCGGACT_ATGTAGAC_CCATTGTG	8348	9633	0.866604	1_day_old
TTGCTAAG_GTAAGGAG_TAACGATT_TGCGAAGT	321	364	0.881868	1_day_old
TTGCTAAG_GTAAGGAG_ATGTAGAC_CGGCGACA	229	253	0.905138	1_day_old
TTGCTAAG_GTAAGGAG_ATGTAGAC_AATAACGT	104	110	0.945455	1_day_old
TTGCTAAG_GGTTCAAT_CGAGCGCT_AATTCTAA	6600	7602	0.868193	1_day_old
TTGCTAAG_GGTTCAAT_AAGGAATC_TGCGAAGT	438	493	0.888438	1_day_old
TTGCTAAG_GGGCTTGG_TAACGATT_AATTCTAA	956	1083	0.882733	1_day_old
TTGCTAAG_GGGCTTGG_GTCCTTCG_TTACGCCG	2132	2413	0.883547	1_day_old
TTGCTAAG_GGGCTTGG_GTCCTTCG_GCGGTTAA	155	188	0.824468	1_day_old
TTGCTAAG_GGGCTTGG_ATGTAGAC_GTCACGTC	766	881	0.869467	1_day_old
TTGCTAAG_GGGCTTGG_AAGGAATC_TGCGAAGT	556	634	0.876972	1_day_old
TTGCTAAG_GGGCTTGG_AAGGAATC_AATAACGT	308	349	0.882521	1_day_old
TTGCTAAG_GGCACGGA_GTCCTTCG_TGCGAAGT	258	300	0.86	1_day_old
TTGCTAAG_GGCACGGA_ATGTAGAC_GTCACGTC	1339	1509	0.887343	1_day_old
TTGCTAAG_GGCACGGA_ATGTAGAC_CCATTGTG	903	995	0.907538	1_day_old
TTGCTAAG_GGCACGGA_ATGTAGAC_AATAACGT	205	237	0.864979	1_day_old
TTGCTAAG_GGCACGGA_ATGTAGAC_AATAACGT	1675	1891	0.885775	1_day_old
TTGCTAAG_GCCCACGT_TAACGATT_CGGCGACA	1405	1588	0.884761	1_day_old
TTGCTAAG_GCCCACGT_AAGGAATC_CCATTGTG	767	838	0.915274	1_day_old
TTGCTAAG_GCATTAAG_TAACGATT_AATAACGT	460	519	0.88632	1_day_old
TTGCTAAG_GCATTAAG_GTTATCCG_CGGCGACA	2903	3445	0.842671	1_day_old
TTGCTAAG_GCATTAAG_GTCCTTCG_AATAACGT	700	767	0.912647	1_day_old
TTGCTAAG_GCATTAAG_AAGGAATC_AATAACGT	679	768	0.884115	1_day_old
TTGCTAAG_GCAGCCTC_GTTATCCG_GCGGTTAA	2451	2786	0.879756	1_day_old
TTGCTAAG_GCAGCCTC_ATGTAGAC_CGGCGACA	331	378	0.875661	1_day_old
TTGCTAAG_GCAGCCTC_ATGTAGAC_CCATTGTG	1830	2086	0.877277	1_day_old
TTGCTAAG_GCAGCCTC_AAGGAATC_TTACGCCG	886	1002	0.884232	1_day_old
TTGCTAAG_GCAGCCTC_AAGGAATC_TGCGAAGT	610	701	0.870185	1_day_old
TTGCTAAG_GCAGCCTC_AAGGAATC_AATTCTAA	1262	1407	0.896944	1_day_old
TTGCTAAG_GCAAATTT_AAGGAATC_GTCACGTC	1484	1646	0.90158	1_day_old
TTGCTAAG_GATTCCCA_GTCCTTCG_GCGGTTAA	2133	2418	0.882134	1_day_old
TTGCTAAG_GATTCCCA_GTCCTTCG_CCATTGTG	171	191	0.895288	1_day_old
TTGCTAAG_GATTCCCA_AAGGAATC_GCGGTTAA	242	279	0.867384	1_day_old
TTGCTAAG_GATCATTC_TAACGATT_CGGCGACA	429	510	0.841176	1_day_old
TTGCTAAG_GATCATTC_TAACGATT_AATTCTAA	622	722	0.861496	1_day_old
TTGCTAAG_GATCATTC_TAACGATT_AATAACGT	669	776	0.862113	1_day_old
TTGCTAAG_GATCATTC_AAGGAATC_TGCGAAGT	706	815	0.866258	1_day_old
TTGCTAAG_GATCATTC_AAGGAATC_CGGCGACA	5446	6455	0.843687	1_day_old
TTGCTAAG_GAGACGTG_TCGACCGA_TTACGCCG	2587	3008	0.86004	1_day_old
TTGCTAAG_GAGACGTG_TAACGATT_AATTCTAA	832	960	0.866667	1_day_old
TTGCTAAG_GAGACGTG_GTTATCCG_CGGCGACA	764	868	0.880184	1_day_old
TTGCTAAG_GAGACGTG_GTCCTTCG_CGGCGACA	408	462	0.883117	1_day_old
TTGCTAAG_GAGACGTG_AAGGAATC_TTACGCCG	1548	1790	0.864804	1_day_old
TTGCTAAG_GACGTGGC_TAACGATT_GTCACGTC	278	319	0.871473	1_day_old
TTGCTAAG_GACGTGGC_GTCCTTCG_TTACGCCG	457	508	0.899606	1_day_old
TTGCTAAG_GACGTGGC_ATGTAGAC_GTCACGTC	2230	2526	0.882819	1_day_old
TTGCTAAG_GAACTCGA_GTCCTTCG_CGGCGACA	352	395	0.891139	1_day_old
TTGCTAAG_CTTTAACA_TAACGATT_TTACGCCG	169	188	0.898936	1_day_old
TTGCTAAG_CTTTAACA_TAACGATT_CGGCGACA	525	595	0.882353	1_day_old
TTGCTAAG_CTTTAACA_GTCCTTCG_AATAACGT	2654	3116	0.851733	1_day_old
TTGCTAAG_CTTTAACA_ATGTAGAC_AATAACGT	891	992	0.898185	1_day_old
TTGCTAAG_CTTTAACA_AAGGAATC_TGCGAAGT	743	824	0.901699	1_day_old
TTGCTAAG_CTTTAACA_AAGGAATC_CCATTGTG	433	480	0.902083	1_day_old
TTGCTAAG_CTTTAACA_AAGGAATC_CCATTGTG	1121	1241	0.903304	1_day_old
TTGCTAAG_CTTTAACA_AAGGAATC_AATTCTAA	1043	1174	0.888416	1_day_old
TTGCTAAG_CTCTCTAT_GTTATCCG_TGCGAAGT	1506	1733	0.869013	1_day_old
TTGCTAAG_CTAGAAGT_ATGTAGAC_CGGCGACA	560	628	0.89172	1_day_old
TTGCTAAG_CTAGAAGT_AAGGAATC_CCATTGTG	217	269	0.806691	1_day_old
TTGCTAAG_CTAAGCCT_GTCCTTCG_GCGGTTAA	198	227	0.872247	1_day_old
TTGCTAAG_CTAAGCCT_GTCCTTCG_CGGCGACA	1631	1816	0.898128	1_day_old
TTGCTAAG_CTAAGCCT_GTCCTTCG_AATAACGT	222	245	0.906122	1_day_old
TTGCTAAG_CGTAGACC_TAACGATT_GCGGTTAA	137	153	0.895425	1_day_old
TTGCTAAG_CGTAGACC_ATGTAGAC_TTACGCCG	1237	1398	0.884835	1_day_old
TTGCTAAG_CGTAGACC_AAGGAATC_AATAACGT	836	993	0.841893	1_day_old
TTGCTAAG_CGTACCAA_CGAGCGCT_CGGCGACA	4594	5318	0.863859	1_day_old
TTGCTAAG_CGTACCAA_AAGGAATC_GTCACGTC	154	169	0.911243	1_day_old
TTGCTAAG_CGGACTGC_TAACGATT_TTACGCCG	349	397	0.879093	1_day_old
TTGCTAAG_CGGACTGC_AAGGAATC_GCGGTTAA	246	290	0.848276	1_day_old
TTGCTAAG_CGCCAGAT_ATGTAGAC_GTCACGTC	597	704	0.848011	1_day_old
TTGCTAAG_CGATAGGG_TCGACCGA_AATTCTAA	8111	9345	0.867951	1_day_old
TTGCTAAG_CGATAGGG_AAGGAATC_TGCGAAGT	438	516	0.848837	1_day_old
TTGCTAAG_CGATAGGG_AAGGAATC_AATAACGT	422	506	0.833992	1_day_old
TTGCTAAG_CCTTATGT_GTCCTTCG_GCGGTTAA	1055	1157	0.911841	1_day_old
TTGCTAAG_CCTTATGT_GTCCTTCG_CCATTGTG	996	1121	0.888492	1_day_old
TTGCTAAG_CCTGCGGG_CATTGTGG_GCGGTTAA	2423	2764	0.876628	1_day_old
TTGCTAAG_CCTGCGGG_AAGGAATC_TGCGAAGT	309	354	0.872881	1_day_old
TTGCTAAG_CCCTTGGA_TCGACCGA_AATTCTAA	6625	7954	0.832914	1_day_old
TTGCTAAG_CCCTTGGA_GTCCTTCG_CCATTGTG	220	253	0.869565	1_day_old
TTGCTAAG_CCCTTGGA_GTCCTTCG_AATAACGT	111	131	0.847328	1_day_old
TTGCTAAG_CCCTTGGA_ATGTAGAC_AATTCTAA	998	1117	0.893465	1_day_old
TTGCTAAG_CCCTTGGA_ATGTAGAC_AATAACGT	212	243	0.872428	1_day_old
TTGCTAAG_CCAGTTTA_TAACGATT_CCATTGTG	3587	4037	0.888531	1_day_old
TTGCTAAG_CCAGTTTA_GTCCTTCG_CGGCGACA	239	291	0.821306	1_day_old
TTGCTAAG_CCAGTTTA_CATTGTGG_GCGGTTAA	8180	9364	0.873558	1_day_old
TTGCTAAG_CCACCGTT_GTCCTTCG_AATAACGT	149	180	0.827778	1_day_old
TTGCTAAG_CAGCAACG_ATGTAGAC_AATTCTAA	99	113	0.876106	1_day_old
TTGCTAAG_ATTGGGTC_TAACGATT_GCGGTTAA	95	106	0.896226	1_day_old
TTGCTAAG_ATTGGGTC_ATGTAGAC_AATTCTAA	1432	1630	0.878528	1_day_old
TTGCTAAG_ATTGGGTC_AAGGAATC_GTCACGTC	662	741	0.893387	1_day_old
TTGCTAAG_ATTGGGTC_AAGGAATC_AATAACGT	90	110	0.818182	1_day_old
TTGCTAAG_ATTACCGT_TAACGATT_AATTCTAA	414	463	0.894168	1_day_old
TTGCTAAG_ATTACCGT_ATGTAGAC_AATTCTAA	933	1062	0.878531	1_day_old
TTGCTAAG_ATTACCGT_AAGGAATC_GCGGTTAA	128	140	0.914286	1_day_old
TTGCTAAG_ATGGTCAT_GTCCTTCG_TTACGCCG	162	198	0.818182	1_day_old
TTGCTAAG_ATGGTCAT_CATTGTGG_AATTCTAA	2016	2383	0.845992	1_day_old
TTGCTAAG_ATGGTCAT_ATGTAGAC_AATAACGT	2211	2502	0.883693	1_day_old
TTGCTAAG_ATCGAATG_TAACGATT_TGCGAAGT	391	437	0.894737	1_day_old
TTGCTAAG_ATCGAATG_TAACGATT_CGGCGACA	551	640	0.860938	1_day_old
TTGCTAAG_ATCGAATG_GTCCTTCG_AATAACGT	2523	2825	0.893097	1_day_old
TTGCTAAG_ATCGAATG_AAGGAATC_TTACGCCG	1043	1188	0.877946	1_day_old
TTGCTAAG_ATCCAGGA_TAACGATT_AATAACGT	1381	1566	0.881865	1_day_old
TTGCTAAG_AGTCCGAG_GTCCTTCG_CGGCGACA	744	857	0.868145	1_day_old
TTGCTAAG_AGTCCGAG_CGAGCGCT_AATAACGT	100	119	0.840336	1_day_old
TTGCTAAG_AGTCCGAG_AAGGAATC_CCATTGTG	119	133	0.894737	1_day_old
TTGCTAAG_AGGTTGCC_AAGGAATC_AATAACGT	1861	2162	0.860777	1_day_old
TTGCTAAG_AGCCGTTC_TCGACCGA_AATTCTAA	124	142	0.873239	1_day_old
TTGCTAAG_AGCCGTTC_TAACGATT_GTCACGTC	296	348	0.850575	1_day_old
TTGCTAAG_AGCCGTTC_GTCCTTCG_AATTCTAA	1405	1613	0.871048	1_day_old
TTGCTAAG_AGCCGTTC_ATGTAGAC_CGGCGACA	961	1087	0.884085	1_day_old
TTGCTAAG_AGCCGTTC_AAGGAATC_AATTCTAA	179	209	0.856459	1_day_old
TTGCTAAG_AGAGTAGA_TCGACCGA_CGGCGACA	1814	2142	0.846872	1_day_old
TTGCTAAG_AGAGTAGA_TAACGATT_TTACGCCG	1420	1674	0.848268	1_day_old
TTGCTAAG_AGAGTAGA_ATGTAGAC_TTACGCCG	1305	1492	0.874665	1_day_old
TTGCTAAG_AGAGTAGA_AAGGAATC_AATAACGT	2403	2788	0.861908	1_day_old
TTGCTAAG_AGAGATCT_ATGTAGAC_GTCACGTC	670	768	0.872396	1_day_old
TTGCTAAG_ACTTGTTG_TAACGATT_GTCACGTC	1266	1418	0.892807	1_day_old
TTGCTAAG_ACTTGTTG_TAACGATT_CGGCGACA	397	443	0.896163	1_day_old
TTGCTAAG_ACTTGTTG_ATGTAGAC_GTCACGTC	661	740	0.893243	1_day_old
TTGCTAAG_ACTTAGAA_GTTATCCG_CCATTGTG	417	479	0.870564	1_day_old
TTGCTAAG_ACTTAGAA_ATGTAGAC_CGGCGACA	337	381	0.884514	1_day_old
TTGCTAAG_ACTGCATA_TAACGATT_CGGCGACA	1178	1352	0.871302	1_day_old
TTGCTAAG_ACGCGCAG_TAACGATT_CCATTGTG	473	516	0.916667	1_day_old
TTGCTAAG_ACGCGCAG_GTCCTTCG_TTACGCCG	448	504	0.888889	1_day_old
TTGCTAAG_ACGCGCAG_GTCCTTCG_CCATTGTG	2453	2846	0.861911	1_day_old
TTGCTAAG_ACGCGCAG_ATGTAGAC_CGGCGACA	187	209	0.894737	1_day_old
TTGCTAAG_ACGCGCAG_ATGTAGAC_AATAACGT	1643	1850	0.888108	1_day_old
TTGCTAAG_ACGCGCAG_AAGGAATC_GTCACGTC	2133	2395	0.890605	1_day_old
TTGCTAAG_ACGATAAC_AAGGAATC_GCGGTTAA	1154	1271	0.907946	1_day_old
TTGCTAAG_ACCGGCCC_TCGACCGA_AATTCTAA	3593	4180	0.859569	1_day_old
TTGCTAAG_ACCGGCCC_TAACGATT_TGCGAAGT	178	197	0.903553	1_day_old
TTGCTAAG_ACCGGCCC_TAACGATT_GTCACGTC	996	1140	0.873684	1_day_old
TTGCTAAG_ACCGGCCC_GTCCTTCG_TTACGCCG	242	293	0.825939	1_day_old
TTGCTAAG_ACCGGCCC_GTCCTTCG_GCGGTTAA	850	946	0.89852	1_day_old
TTGCTAAG_ACATTCGT_GTCCTTCG_GTCACGTC	932	1042	0.894434	1_day_old
TTGCTAAG_ACATTCGT_GTCCTTCG_CCATTGTG	2996	3426	0.874489	1_day_old
TTGCTAAG_ACATTCGT_ATGTAGAC_TTACGCCG	1280	1440	0.888889	1_day_old
TTGCTAAG_ACATTCGT_ATGTAGAC_GTCACGTC	200	215	0.930233	1_day_old
TTGCTAAG_ACATTCGT_ATGTAGAC_AATTCTAA	1217	1410	0.863121	1_day_old
TTGCTAAG_ACATTCGT_ATGTAGAC_AATAACGT	1453	1653	0.879008	1_day_old
TTGCTAAG_AATCTACA_GTCCTTCG_CCATTGTG	341	393	0.867684	1_day_old
TTGCTAAG_AATCTACA_AAGGAATC_GTCACGTC	864	984	0.878049	1_day_old
TTGCTAAG_AAGGAGTA_GTCCTTCG_GCGGTTAA	1474	1671	0.882107	1_day_old
TTGCTAAG_AAGGAGTA_CATTGTGG_GTCACGTC	1443	1622	0.889642	1_day_old
TTGCTAAG_AACATGAT_TAACGATT_GCGGTTAA	713	830	0.859036	1_day_old
TTGCTAAG_AACATGAT_GTCCTTCG_TTACGCCG	1238	1359	0.910964	1_day_old
TTGCTAAG_AACATGAT_ATGTAGAC_CGGCGACA	867	993	0.873112	1_day_old
TTGACCCT_TTGCCTAA_GTTATCCG_CGGCGACA	6238	7314	0.852885	1_day_old
TTGACCCT_TTGCCTAA_ATGTAGAC_GCGGTTAA	116	133	0.87218	1_day_old
TTGACCCT_TTCGTGCA_AAGGAATC_TTACGCCG	494	573	0.862129	1_day_old
TTGACCCT_TTAACTTG_GTTATCCG_AATTCTAA	109	121	0.900826	1_day_old
TTGACCCT_TTAACTTG_CATTGTGG_TTACGCCG	1713	2046	0.837243	1_day_old
TTGACCCT_TTAACTTG_ATGTAGAC_AATAACGT	375	415	0.903614	1_day_old
TTGACCCT_TGTTCCTG_TAACGATT_AATAACGT	2235	2543	0.878883	1_day_old
TTGACCCT_TGGGCGGT_ATGTAGAC_TTACGCCG	570	627	0.909091	1_day_old
TTGACCCT_TGGGCGGT_AAGGAATC_CCATTGTG	449	526	0.853612	1_day_old
TTGACCCT_TGGAAATC_GTCCTTCG_GCGGTTAA	4092	4746	0.8622	1_day_old
TTGACCCT_TGGAAATC_AAGGAATC_AATTCTAA	377	426	0.884977	1_day_old
TTGACCCT_TGCATACT_GTCCTTCG_AATTCTAA	157	176	0.892045	1_day_old
TTGACCCT_TGATTGTT_TAACGATT_AATTCTAA	930	1093	0.850869	1_day_old
TTGACCCT_TGATTGTT_GTCCTTCG_GCGGTTAA	797	929	0.857912	1_day_old
TTGACCCT_TGATTGTT_GTCCTTCG_CCATTGTG	3103	3548	0.874577	1_day_old
TTGACCCT_TGATGAAA_GTCCTTCG_GTCACGTC	1352	1562	0.865557	1_day_old
TTGACCCT_TCTGGCGA_TAACGATT_CGGCGACA	133	143	0.93007	1_day_old
TTGACCCT_TCTGGCGA_AAGGAATC_AATAACGT	299	353	0.847025	1_day_old
TTGACCCT_TCCGAGTT_TAACGATT_GTCACGTC	445	505	0.881188	1_day_old
TTGACCCT_TCCATCAA_TCGACCGA_CGGCGACA	881	1064	0.828008	1_day_old
TTGACCCT_TCCATCAA_TAACGATT_GTCACGTC	135	146	0.924658	1_day_old
TTGACCCT_TCCATCAA_TAACGATT_GCGGTTAA	116	132	0.878788	1_day_old
TTGACCCT_TCCATCAA_GTTATCCG_GTCACGTC	5215	6085	0.857025	1_day_old
TTGACCCT_TCCATCAA_GTCCTTCG_CCATTGTG	1119	1261	0.887391	1_day_old
TTGACCCT_TCACATGG_GTCCTTCG_GCGGTTAA	420	473	0.887949	1_day_old
TTGACCCT_TCACATGG_CGAGCGCT_GTCACGTC	2506	2936	0.853542	1_day_old
TTGACCCT_TCACATGG_AAGGAATC_GTCACGTC	456	548	0.832117	1_day_old
TTGACCCT_TATTTGCG_CATTGTGG_TTACGCCG	6492	7400	0.877297	1_day_old
TTGACCCT_TATTTGCG_ATGTAGAC_TTACGCCG	1385	1546	0.89586	1_day_old
TTGACCCT_TATCCTCT_GTTATCCG_GCGGTTAA	111	129	0.860465	1_day_old
TTGACCCT_TAGATCGC_ATGTAGAC_GTCACGTC	132	148	0.891892	1_day_old
TTGACCCT_TACTGACC_TAACGATT_GTCACGTC	138	161	0.857143	1_day_old
TTGACCCT_TACTGACC_ATGTAGAC_GTCACGTC	2118	2462	0.860276	1_day_old
TTGACCCT_TACTGACC_ATGTAGAC_CGGCGACA	406	460	0.882609	1_day_old
TTGACCCT_TAAGTTAC_ATGTAGAC_AATAACGT	146	171	0.853801	1_day_old
TTGACCCT_TAAGTTAC_AAGGAATC_TTACGCCG	532	596	0.892617	1_day_old
TTGACCCT_TAAGTTAC_AAGGAATC_GTCACGTC	1027	1194	0.860134	1_day_old
TTGACCCT_TAACCAAG_TCGACCGA_CCATTGTG	708	811	0.872996	1_day_old
TTGACCCT_TAACCAAG_TAACGATT_CCATTGTG	470	530	0.886792	1_day_old
TTGACCCT_TAACCAAG_GTCCTTCG_CGGCGACA	728	831	0.876053	1_day_old
TTGACCCT_TAACCAAG_GTCCTTCG_CGGCGACA	1023	1144	0.894231	1_day_old
TTGACCCT_GTGTATCG_TAACGATT_AATTCTAA	717	807	0.888476	1_day_old
TTGACCCT_GTGTATCG_TAACGATT_AATAACGT	860	973	0.883864	1_day_old
TTGACCCT_GTGTATCG_CGAGCGCT_TGCGAAGT	93	111	0.837838	1_day_old
TTGACCCT_GTCGGACT_GTCCTTCG_CGGCGACA	1004	1147	0.875327	1_day_old
TTGACCCT_GTCGGACT_GTCCTTCG_AATTCTAA	1094	1248	0.876603	1_day_old
TTGACCCT_GTCGGACT_CGAGCGCT_TGCGAAGT	5511	6529	0.84408	1_day_old
TTGACCCT_GTCGGACT_AAGGAATC_GCGGTTAA	502	600	0.836667	1_day_old
TTGACCCT_GTCGGACT_AAGGAATC_AATTCTAA	2259	2600	0.868846	1_day_old
TTGACCCT_GTAAGGAG_CATTGTGG_GTCACGTC	95	108	0.87963	1_day_old
TTGACCCT_GGTTCAAT_GTCCTTCG_AATAACGT	888	1050	0.845714	1_day_old
TTGACCCT_GGTTCAAT_CGAGCGCT_GCGGTTAA	2729	3118	0.875241	1_day_old
TTGACCCT_GGTTCAAT_AAGGAATC_CCATTGTG	359	431	0.832947	1_day_old
TTGACCCT_GGTTCAAT_AAGGAATC_AATTCTAA	425	480	0.885417	1_day_old
TTGACCCT_GGTTCAAT_AAGGAATC_AATAACGT	627	703	0.891892	1_day_old
TTGACCCT_GGTGAAGG_TAACGATT_CCATTGTG	183	204	0.897059	1_day_old
TTGACCCT_GGTGAAGG_CATTGTGG_GTCACGTC	5649	6488	0.870684	1_day_old
TTGACCCT_GGTGAAGG_ATGTAGAC_CGGCGACA	99	109	0.908257	1_day_old
TTGACCCT_GGGCTTGG_TAACGATT_TTACGCCG	1689	1913	0.882906	1_day_old
TTGACCCT_GGGCTTGG_CGAGCGCT_AATAACGT	106	118	0.898305	1_day_old
TTGACCCT_GGGCTTGG_AAGGAATC_TGCGAAGT	117	131	0.89313	1_day_old
TTGACCCT_GGGCTTGG_AAGGAATC_AATAACGT	374	437	0.855835	1_day_old
TTGACCCT_GGCACGGA_TAACGATT_GTCACGTC	113	127	0.889764	1_day_old
TTGACCCT_GCATTAAG_GTCCTTCG_AATAACGT	865	983	0.879959	1_day_old
TTGACCCT_GCAGCCTC_CGAGCGCT_GCGGTTAA	223	259	0.861004	1_day_old
TTGACCCT_GCAAATTT_GTCCTTCG_TGCGAAGT	862	1011	0.852621	1_day_old
TTGACCCT_GATTCCCA_TCGACCGA_GTCACGTC	129	148	0.871622	1_day_old
TTGACCCT_GATTCCCA_TCGACCGA_CCATTGTG	84	101	0.831683	1_day_old
TTGACCCT_GATTCCCA_TAACGATT_GCGGTTAA	1521	1771	0.858837	1_day_old
TTGACCCT_GATTCCCA_CGAGCGCT_TGCGAAGT	157	181	0.867403	1_day_old
TTGACCCT_GATTCCCA_CGAGCGCT_AATTCTAA	131	153	0.856209	1_day_old
TTGACCCT_GATCATTC_GTCCTTCG_AATAACGT	286	337	0.848665	1_day_old
TTGACCCT_GATCATTC_CATTGTGG_GTCACGTC	2169	2541	0.853601	1_day_old
TTGACCCT_GAGACGTG_GTCCTTCG_CCATTGTG	242	282	0.858156	1_day_old
TTGACCCT_GACGTGGC_GTCCTTCG_TTACGCCG	369	426	0.866197	1_day_old
TTGACCCT_GAACTCGA_GTCCTTCG_CCATTGTG	478	549	0.870674	1_day_old
TTGACCCT_GAACTCGA_ATGTAGAC_GCGGTTAA	937	1069	0.87652	1_day_old
TTGACCCT_CTTTAACA_GTCCTTCG_CGGCGACA	96	104	0.923077	1_day_old
TTGACCCT_CTTTAACA_GTCCTTCG_CCATTGTG	792	881	0.898978	1_day_old
TTGACCCT_CTTTAACA_ATGTAGAC_AATTCTAA	547	659	0.830046	1_day_old
TTGACCCT_CTTTAACA_AAGGAATC_CCATTGTG	1028	1148	0.89547	1_day_old
TTGACCCT_CTCTCTAT_TAACGATT_CCATTGTG	670	746	0.898123	1_day_old
TTGACCCT_CTCTCTAT_GTTATCCG_GCGGTTAA	1647	1931	0.852926	1_day_old
TTGACCCT_CTCTCTAT_GTTATCCG_CCATTGTG	2947	3415	0.862958	1_day_old
TTGACCCT_CTCTCTAT_AAGGAATC_AATTCTAA	2368	2763	0.857039	1_day_old
TTGACCCT_CTAGAAGT_GTCCTTCG_TTACGCCG	174	203	0.857143	1_day_old
TTGACCCT_CTAGAAGT_ATGTAGAC_CGGCGACA	610	675	0.903704	1_day_old
TTGACCCT_CTAGAAGT_AAGGAATC_TGCGAAGT	888	1005	0.883582	1_day_old
TTGACCCT_CTAGAAGT_AAGGAATC_CGGCGACA	2788	3199	0.871522	1_day_old
TTGACCCT_CTAGAAGT_AAGGAATC_AATTCTAA	711	832	0.854567	1_day_old
TTGACCCT_CTAGAAGT_AAGGAATC_AATAACGT	210	240	0.875	1_day_old
TTGACCCT_CGTAGACC_GTCCTTCG_GCGGTTAA	94	113	0.831858	1_day_old
TTGACCCT_CGTAGACC_GTCCTTCG_AATAACGT	825	964	0.855809	1_day_old
TTGACCCT_CGTAGACC_AAGGAATC_CGGCGACA	104	116	0.896552	1_day_old
TTGACCCT_CGTAGACC_AAGGAATC_AATTCTAA	293	323	0.907121	1_day_old
TTGACCCT_CGTACCAA_TAACGATT_GTCACGTC	436	521	0.836852	1_day_old
TTGACCCT_CGTACCAA_TAACGATT_CGGCGACA	92	109	0.844037	1_day_old
TTGACCCT_CGTACCAA_ATGTAGAC_GTCACGTC	116	137	0.846715	1_day_old
TTGACCCT_CGTACCAA_AAGGAATC_GCGGTTAA	191	216	0.884259	1_day_old
TTGACCCT_CGGACTGC_ATGTAGAC_TTACGCCG	135	158	0.85443	1_day_old
TTGACCCT_CGGACTGC_AAGGAATC_GTCACGTC	348	388	0.896907	1_day_old
TTGACCCT_CGCCAGAT_AAGGAATC_TGCGAAGT	99	114	0.868421	1_day_old
TTGACCCT_CGCCAGAT_AAGGAATC_AATAACGT	872	977	0.892528	1_day_old
TTGACCCT_CGATAGGG_GTCCTTCG_AATAACGT	921	1068	0.86236	1_day_old
TTGACCCT_CCTTATGT_TAACGATT_AATAACGT	304	380	0.8	1_day_old
TTGACCCT_CCTTATGT_GTCCTTCG_GCGGTTAA	425	487	0.87269	1_day_old
TTGACCCT_CCTTATGT_AAGGAATC_AATTCTAA	2773	3166	0.875869	1_day_old
TTGACCCT_CCTGCGGG_TAACGATT_GCGGTTAA	145	165	0.878788	1_day_old
TTGACCCT_CCTGCGGG_GTTATCCG_CGGCGACA	119	140	0.85	1_day_old
TTGACCCT_CCTGCGGG_GTCCTTCG_GCGGTTAA	1614	1885	0.856233	1_day_old
TTGACCCT_CCTGCGGG_ATGTAGAC_CCATTGTG	361	415	0.86988	1_day_old
TTGACCCT_CCTGCGGG_AAGGAATC_TTACGCCG	880	999	0.880881	1_day_old
TTGACCCT_CCTGCGGG_AAGGAATC_TGCGAAGT	490	538	0.910781	1_day_old
TTGACCCT_CCTGCGGG_AAGGAATC_CCATTGTG	444	492	0.902439	1_day_old
TTGACCCT_CCCTTGGA_AAGGAATC_TTACGCCG	435	493	0.882353	1_day_old
TTGACCCT_CCAGTTTA_TAACGATT_GTCACGTC	296	351	0.843305	1_day_old
TTGACCCT_CCAGTTTA_TAACGATT_CCATTGTG	316	355	0.890141	1_day_old
TTGACCCT_CCAGTTTA_GTCCTTCG_TGCGAAGT	1134	1267	0.895028	1_day_old
TTGACCCT_CCAGTTTA_CGAGCGCT_TTACGCCG	826	923	0.894908	1_day_old
TTGACCCT_CCAGTTTA_ATGTAGAC_TTACGCCG	4233	4844	0.873865	1_day_old
TTGACCCT_CCAGTTTA_AAGGAATC_GTCACGTC	400	440	0.909091	1_day_old
TTGACCCT_CCACCGTT_GTCCTTCG_GCGGTTAA	304	341	0.891496	1_day_old
TTGACCCT_CAGCAACG_ATGTAGAC_CCATTGTG	95	113	0.840708	1_day_old
TTGACCCT_CAGCAACG_ATGTAGAC_AATAACGT	2049	2382	0.860202	1_day_old
TTGACCCT_ATTGGGTC_TAACGATT_CCATTGTG	459	513	0.894737	1_day_old
TTGACCCT_ATTACCGT_GTCCTTCG_GCGGTTAA	116	146	0.794521	1_day_old
TTGACCCT_ATCGAATG_CGAGCGCT_AATTCTAA	4798	5551	0.864349	1_day_old
TTGACCCT_ATCGAATG_AAGGAATC_GCGGTTAA	1746	2026	0.861797	1_day_old
TTGACCCT_ATCGAATG_AAGGAATC_AATTCTAA	758	869	0.872267	1_day_old
TTGACCCT_ATCCAGGA_TAACGATT_TTACGCCG	186	228	0.815789	1_day_old
TTGACCCT_ATCCAGGA_ATGTAGAC_AATAACGT	1447	1663	0.870114	1_day_old
TTGACCCT_ATCCAGGA_AAGGAATC_AATAACGT	1514	1724	0.87819	1_day_old
TTGACCCT_AGTCCGAG_TAACGATT_CCATTGTG	352	394	0.893401	1_day_old
TTGACCCT_AGTCCGAG_ATGTAGAC_TTACGCCG	518	586	0.883959	1_day_old
TTGACCCT_AGTCCGAG_AAGGAATC_TTACGCCG	326	357	0.913165	1_day_old
TTGACCCT_AGTCCGAG_AAGGAATC_GCGGTTAA	868	1014	0.856016	1_day_old
TTGACCCT_AGGTTGCC_AAGGAATC_TGCGAAGT	526	581	0.905336	1_day_old
TTGACCCT_AGGTTGCC_AAGGAATC_GTCACGTC	854	997	0.85657	1_day_old
TTGACCCT_AGCCGTTC_GTCCTTCG_GCGGTTAA	727	830	0.875904	1_day_old
TTGACCCT_AGAGTAGA_GTCCTTCG_TGCGAAGT	303	359	0.844011	1_day_old
TTGACCCT_AGAGTAGA_ATGTAGAC_TTACGCCG	186	237	0.78481	1_day_old
TTGACCCT_AGAGATCT_ATGTAGAC_GTCACGTC	685	763	0.897772	1_day_old
TTGACCCT_AGAGATCT_AAGGAATC_TTACGCCG	996	1110	0.897297	1_day_old
TTGACCCT_ACTTGTTG_GTCCTTCG_TTACGCCG	109	121	0.900826	1_day_old
TTGACCCT_ACTTGTTG_GTCCTTCG_GCGGTTAA	86	105	0.819048	1_day_old
TTGACCCT_ACTTGTTG_ATGTAGAC_GTCACGTC	1307	1465	0.89215	1_day_old
TTGACCCT_ACTTGTTG_ATGTAGAC_CGGCGACA	88	107	0.82243	1_day_old
TTGACCCT_ACTTGTTG_ATGTAGAC_CCATTGTG	306	356	0.859551	1_day_old
TTGACCCT_ACTTGTTG_AAGGAATC_CCATTGTG	666	748	0.890374	1_day_old
TTGACCCT_ACTTAGAA_TAACGATT_GTCACGTC	876	966	0.906832	1_day_old
TTGACCCT_ACTTAGAA_ATGTAGAC_TTACGCCG	561	654	0.857798	1_day_old
TTGACCCT_ACTTAGAA_ATGTAGAC_AATAACGT	705	784	0.899235	1_day_old
TTGACCCT_ACGCGCAG_GTCCTTCG_TTACGCCG	613	717	0.854951	1_day_old
TTGACCCT_ACGATAAC_GTCCTTCG_TTACGCCG	207	236	0.877119	1_day_old
TTGACCCT_ACGATAAC_GTCCTTCG_AATAACGT	1413	1559	0.90635	1_day_old
TTGACCCT_ACGATAAC_AAGGAATC_GCGGTTAA	636	740	0.859459	1_day_old
TTGACCCT_ACCGGCCC_TAACGATT_AATTCTAA	154	173	0.890173	1_day_old
TTGACCCT_ACCGGCCC_GTCCTTCG_AATTCTAA	707	794	0.890428	1_day_old
TTGACCCT_ACCGGCCC_ATGTAGAC_CCATTGTG	912	1010	0.90297	1_day_old
TTGACCCT_ACCGGCCC_AAGGAATC_CGGCGACA	210	247	0.850202	1_day_old
TTGACCCT_ACCGGCCC_AAGGAATC_AATTCTAA	903	1022	0.883562	1_day_old
TTGACCCT_ACATTCGT_TAACGATT_AATAACGT	251	274	0.916058	1_day_old
TTGACCCT_ACATTCGT_GTCCTTCG_TTACGCCG	1839	2103	0.874465	1_day_old
TTGACCCT_ACATTCGT_GTCCTTCG_TTACGCCG	2052	2346	0.87468	1_day_old
TTGACCCT_ACATTCGT_GTCCTTCG_CGGCGACA	502	541	0.927911	1_day_old
TTGACCCT_ACATTCGT_AAGGAATC_TTACGCCG	1674	1895	0.883377	1_day_old
TTGACCCT_AATCTACA_ATGTAGAC_CCATTGTG	106	124	0.854839	1_day_old
TTGACCCT_AATCTACA_AAGGAATC_GCGGTTAA	1250	1446	0.864454	1_day_old
TTGACCCT_AACATGAT_GTTATCCG_GTCACGTC	6093	7074	0.861323	1_day_old
TTGACCCT_AACATGAT_AAGGAATC_CCATTGTG	189	213	0.887324	1_day_old
TTCGCGGC_TTTCTAGC_ATGTAGAC_CGGCGACA	222	261	0.850575	1_day_old
TTCGCGGC_TTGCCTAA_TAACGATT_AATAACGT	849	965	0.879793	1_day_old
TTCGCGGC_TTGCCTAA_CGAGCGCT_GTCACGTC	2518	2896	0.869475	1_day_old
TTCGCGGC_TTGCCTAA_CATTGTGG_GTCACGTC	3355	3874	0.86603	1_day_old
TTCGCGGC_TTGCCTAA_ATGTAGAC_CGGCGACA	1592	1834	0.868048	1_day_old
TTCGCGGC_TTGCCTAA_AAGGAATC_TTACGCCG	212	235	0.902128	1_day_old
TTCGCGGC_TTGCCTAA_AAGGAATC_GCGGTTAA	896	1008	0.888889	1_day_old
TTCGCGGC_TTCGTGCA_ATGTAGAC_AATAACGT	1089	1234	0.882496	1_day_old
TTCGCGGC_TTAACTTG_GTTATCCG_AATTCTAA	92	105	0.87619	1_day_old
TTCGCGGC_TGTTCCTG_TAACGATT_AATAACGT	592	672	0.880952	1_day_old
TTCGCGGC_TGTTCCTG_GTCCTTCG_TTACGCCG	199	235	0.846809	1_day_old
TTCGCGGC_TGTTCCTG_CATTGTGG_GTCACGTC	2323	2680	0.866791	1_day_old
TTCGCGGC_TGTTCCTG_CATTGTGG_AATAACGT	459	534	0.859551	1_day_old
TTCGCGGC_TGGGCGGT_TAACGATT_TTACGCCG	614	706	0.869688	1_day_old
TTCGCGGC_TGGGCGGT_TAACGATT_CGGCGACA	2471	2853	0.866106	1_day_old
TTCGCGGC_TGGGCGGT_TAACGATT_CCATTGTG	279	321	0.869159	1_day_old
TTCGCGGC_TGCATACT_TAACGATT_TGCGAAGT	136	155	0.877419	1_day_old
TTCGCGGC_TGCATACT_GTCCTTCG_TTACGCCG	717	813	0.881919	1_day_old
TTCGCGGC_TGCATACT_CGAGCGCT_GTCACGTC	116	122	0.95082	1_day_old
TTCGCGGC_TGCATACT_CATTGTGG_AATAACGT	101	116	0.87069	1_day_old
TTCGCGGC_TGATTGTT_AAGGAATC_GCGGTTAA	236	263	0.897338	1_day_old
TTCGCGGC_TGATTGTT_AAGGAATC_CGGCGACA	1439	1687	0.852993	1_day_old
TTCGCGGC_TGATGAAA_GTCCTTCG_TTACGCCG	189	218	0.866972	1_day_old
TTCGCGGC_TGATGAAA_AAGGAATC_AATTCTAA	276	299	0.923077	1_day_old
TTCGCGGC_TCTGGCGA_TAACGATT_GTCACGTC	411	464	0.885776	1_day_old
TTCGCGGC_TCTGGCGA_AAGGAATC_TGCGAAGT	532	575	0.925217	1_day_old
TTCGCGGC_TCTGGCGA_AAGGAATC_CGGCGACA	638	708	0.90113	1_day_old
TTCGCGGC_TCCGAGTT_TAACGATT_AATAACGT	131	147	0.891156	1_day_old
TTCGCGGC_TCCGAGTT_ATGTAGAC_GTCACGTC	1366	1551	0.880722	1_day_old
TTCGCGGC_TCCGAGTT_AAGGAATC_TGCGAAGT	148	173	0.855491	1_day_old
TTCGCGGC_TCCGAGTT_AAGGAATC_TGCGAAGT	927	1038	0.893064	1_day_old
TTCGCGGC_TCCATCAA_AAGGAATC_TGCGAAGT	451	497	0.907445	1_day_old
TTCGCGGC_TCCATCAA_AAGGAATC_GTCACGTC	1057	1197	0.883041	1_day_old
TTCGCGGC_TCACATGG_TCGACCGA_AATAACGT	1593	1938	0.821981	1_day_old
TTCGCGGC_TCACATGG_TAACGATT_GCGGTTAA	403	463	0.87041	1_day_old
TTCGCGGC_TCACATGG_TAACGATT_CGGCGACA	413	457	0.90372	1_day_old
TTCGCGGC_TCACATGG_ATGTAGAC_CCATTGTG	1188	1369	0.867787	1_day_old
TTCGCGGC_TCACATGG_AAGGAATC_TTACGCCG	610	687	0.887918	1_day_old
TTCGCGGC_TCAAGAGC_GTTATCCG_GTCACGTC	2756	3298	0.835658	1_day_old
TTCGCGGC_TATTTGCG_GTCCTTCG_AATAACGT	160	174	0.91954	1_day_old
TTCGCGGC_TATTTGCG_ATGTAGAC_CCATTGTG	723	828	0.873188	1_day_old
TTCGCGGC_TATTTGCG_AAGGAATC_TTACGCCG	1180	1333	0.885221	1_day_old
TTCGCGGC_TATCCTCT_TCGACCGA_CGGCGACA	995	1133	0.878199	1_day_old
TTCGCGGC_TATCCTCT_AAGGAATC_AATAACGT	709	816	0.868873	1_day_old
TTCGCGGC_TAGATCGC_TAACGATT_GTCACGTC	1016	1164	0.872852	1_day_old
TTCGCGGC_TAGATCGC_CGAGCGCT_AATTCTAA	3310	3844	0.861082	1_day_old
TTCGCGGC_TAGATCGC_ATGTAGAC_GTCACGTC	151	173	0.872832	1_day_old
TTCGCGGC_TACTGACC_TAACGATT_TGCGAAGT	467	512	0.912109	1_day_old
TTCGCGGC_TACTGACC_AAGGAATC_GCGGTTAA	150	171	0.877193	1_day_old
TTCGCGGC_TAAGTTAC_TAACGATT_GTCACGTC	451	501	0.9002	1_day_old
TTCGCGGC_TAAGTTAC_TAACGATT_GCGGTTAA	364	408	0.892157	1_day_old
TTCGCGGC_TAAGTTAC_GTCCTTCG_TGCGAAGT	88	102	0.862745	1_day_old
TTCGCGGC_TAAGTTAC_CATTGTGG_TTACGCCG	537	625	0.8592	1_day_old
TTCGCGGC_TAAGTTAC_ATGTAGAC_GCGGTTAA	253	290	0.872414	1_day_old
TTCGCGGC_TAACCAAG_GTCCTTCG_GCGGTTAA	1696	1991	0.851833	1_day_old
TTCGCGGC_GTGTATCG_GTCCTTCG_TTACGCCG	469	535	0.876636	1_day_old
TTCGCGGC_GTCGGACT_TAACGATT_AATTCTAA	182	204	0.892157	1_day_old
TTCGCGGC_GTCGGACT_CATTGTGG_CGGCGACA	1118	1306	0.856049	1_day_old
TTCGCGGC_GTCGGACT_ATGTAGAC_GTCACGTC	308	352	0.875	1_day_old
TTCGCGGC_GTAAGGAG_TAACGATT_TTACGCCG	351	419	0.837709	1_day_old
TTCGCGGC_GTAAGGAG_TAACGATT_CGGCGACA	146	159	0.918239	1_day_old
TTCGCGGC_GTAAGGAG_TAACGATT_AATAACGT	427	468	0.912393	1_day_old
TTCGCGGC_GTAAGGAG_GTCCTTCG_CGGCGACA	463	521	0.888676	1_day_old
TTCGCGGC_GTAAGGAG_CGAGCGCT_AATAACGT	2903	3321	0.874134	1_day_old
TTCGCGGC_GGTTCAAT_ATGTAGAC_GTCACGTC	100	110	0.909091	1_day_old
TTCGCGGC_GGTTCAAT_AAGGAATC_GTCACGTC	296	326	0.907975	1_day_old
TTCGCGGC_GGTGAAGG_ATGTAGAC_GTCACGTC	515	594	0.867003	1_day_old
TTCGCGGC_GGTGAAGG_AAGGAATC_TTACGCCG	674	790	0.853165	1_day_old
TTCGCGGC_GGTGAAGG_AAGGAATC_TGCGAAGT	290	362	0.801105	1_day_old
TTCGCGGC_GGGCTTGG_TAACGATT_GCGGTTAA	262	299	0.876254	1_day_old
TTCGCGGC_GGGCTTGG_GTCCTTCG_TTACGCCG	256	306	0.836601	1_day_old
TTCGCGGC_GGGCTTGG_GTCCTTCG_CGGCGACA	602	703	0.85633	1_day_old
TTCGCGGC_GGGCTTGG_CATTGTGG_TTACGCCG	3446	3947	0.873068	1_day_old
TTCGCGGC_GGCACGGA_ATGTAGAC_CCATTGTG	3884	4545	0.854565	1_day_old
TTCGCGGC_GGCACGGA_ATGTAGAC_AATTCTAA	719	822	0.874696	1_day_old
TTCGCGGC_GCATTAAG_TAACGATT_CGGCGACA	388	436	0.889908	1_day_old
TTCGCGGC_GCATTAAG_TAACGATT_CCATTGTG	2990	3337	0.896014	1_day_old
TTCGCGGC_GCATTAAG_TAACGATT_AATAACGT	1345	1529	0.87966	1_day_old
TTCGCGGC_GCATTAAG_GTCCTTCG_GTCACGTC	992	1165	0.851502	1_day_old
TTCGCGGC_GCATTAAG_AAGGAATC_AATTCTAA	985	1131	0.870911	1_day_old
TTCGCGGC_GCAGCCTC_TCGACCGA_TGCGAAGT	550	667	0.824588	1_day_old
TTCGCGGC_GCAGCCTC_GTTATCCG_TTACGCCG	2431	2814	0.863895	1_day_old
TTCGCGGC_GCAGCCTC_ATGTAGAC_TGCGAAGT	483	554	0.871841	1_day_old
TTCGCGGC_GCAAATTT_TAACGATT_CGGCGACA	364	409	0.889976	1_day_old
TTCGCGGC_GCAAATTT_ATGTAGAC_CCATTGTG	2693	3077	0.875203	1_day_old
TTCGCGGC_GATTCCCA_TCGACCGA_AATTCTAA	2304	2648	0.870091	1_day_old
TTCGCGGC_GATCATTC_GTTATCCG_CGGCGACA	5606	6666	0.840984	1_day_old
TTCGCGGC_GATCATTC_GTCCTTCG_TTACGCCG	94	106	0.886792	1_day_old
TTCGCGGC_GAGACGTG_ATGTAGAC_TGCGAAGT	116	127	0.913386	1_day_old
TTCGCGGC_GAGACGTG_ATGTAGAC_AATTCTAA	194	222	0.873874	1_day_old
TTCGCGGC_GAGACGTG_AAGGAATC_TTACGCCG	403	443	0.909707	1_day_old
TTCGCGGC_GACGTGGC_GTCCTTCG_TTACGCCG	200	226	0.884956	1_day_old
TTCGCGGC_GACGTGGC_ATGTAGAC_CCATTGTG	400	457	0.875274	1_day_old
TTCGCGGC_GAACTCGA_AAGGAATC_AATTCTAA	2595	2927	0.886573	1_day_old
TTCGCGGC_CTCTCTAT_CGAGCGCT_TTACGCCG	7858	9121	0.861528	1_day_old
TTCGCGGC_CTAGAAGT_GTCCTTCG_TTACGCCG	362	404	0.89604	1_day_old
TTCGCGGC_CTAGAAGT_GTCCTTCG_CGGCGACA	987	1134	0.87037	1_day_old
TTCGCGGC_CTAGAAGT_AAGGAATC_TTACGCCG	883	994	0.88833	1_day_old
TTCGCGGC_CTAAGCCT_GTTATCCG_CGGCGACA	2781	3206	0.867436	1_day_old
TTCGCGGC_CTAAGCCT_ATGTAGAC_CCATTGTG	166	180	0.922222	1_day_old
TTCGCGGC_CTAAGCCT_AAGGAATC_AATAACGT	269	302	0.890728	1_day_old
TTCGCGGC_CGTAGACC_GTTATCCG_AATTCTAA	530	617	0.858995	1_day_old
TTCGCGGC_CGTAGACC_AAGGAATC_CCATTGTG	352	406	0.866995	1_day_old
TTCGCGGC_CGTAGACC_AAGGAATC_AATTCTAA	162	177	0.915254	1_day_old
TTCGCGGC_CGTACCAA_TAACGATT_AATTCTAA	556	615	0.904065	1_day_old
TTCGCGGC_CGTACCAA_GTCCTTCG_TGCGAAGT	209	232	0.900862	1_day_old
TTCGCGGC_CGTACCAA_GTCCTTCG_CCATTGTG	671	779	0.861361	1_day_old
TTCGCGGC_CGTACCAA_GTCCTTCG_AATTCTAA	237	265	0.89434	1_day_old
TTCGCGGC_CGTACCAA_ATGTAGAC_GTCACGTC	119	139	0.856115	1_day_old
TTCGCGGC_CGTACCAA_ATGTAGAC_AATAACGT	108	126	0.857143	1_day_old
TTCGCGGC_CGGACTGC_ATGTAGAC_AATAACGT	367	401	0.915212	1_day_old
TTCGCGGC_CGGACTGC_AAGGAATC_GTCACGTC	992	1157	0.85739	1_day_old
TTCGCGGC_CGCCAGAT_GTCCTTCG_CGGCGACA	812	902	0.900222	1_day_old
TTCGCGGC_CGCCAGAT_AAGGAATC_CCATTGTG	135	160	0.84375	1_day_old
TTCGCGGC_CGATAGGG_GTCCTTCG_CGGCGACA	509	569	0.894552	1_day_old
TTCGCGGC_CGATAGGG_ATGTAGAC_CGGCGACA	228	260	0.876923	1_day_old
TTCGCGGC_CGATAGGG_AAGGAATC_TTACGCCG	427	486	0.878601	1_day_old
TTCGCGGC_CCTTATGT_GTTATCCG_AATAACGT	6080	7127	0.853094	1_day_old
TTCGCGGC_CCTTATGT_GTCCTTCG_AATAACGT	1493	1706	0.875147	1_day_old
TTCGCGGC_CCTGCGGG_GTCCTTCG_TTACGCCG	895	1016	0.880906	1_day_old
TTCGCGGC_CCTGCGGG_GTCCTTCG_AATAACGT	243	289	0.84083	1_day_old
TTCGCGGC_CCTGCGGG_CATTGTGG_CGGCGACA	127	150	0.846667	1_day_old
TTCGCGGC_CCTGCGGG_AAGGAATC_GCGGTTAA	290	333	0.870871	1_day_old
TTCGCGGC_CCTGCGGG_AAGGAATC_AATAACGT	699	776	0.900773	1_day_old
TTCGCGGC_CCCTTGGA_ATGTAGAC_CGGCGACA	409	469	0.872068	1_day_old
TTCGCGGC_CCCTTGGA_AAGGAATC_TTACGCCG	127	145	0.875862	1_day_old
TTCGCGGC_CCCTTGGA_AAGGAATC_AATTCTAA	182	204	0.892157	1_day_old
TTCGCGGC_CCAGTTTA_TAACGATT_TTACGCCG	776	893	0.868981	1_day_old
TTCGCGGC_CCAGTTTA_TAACGATT_AATAACGT	100	118	0.847458	1_day_old
TTCGCGGC_CCAGTTTA_GTCCTTCG_TTACGCCG	106	122	0.868852	1_day_old
TTCGCGGC_CCAGTTTA_ATGTAGAC_CCATTGTG	299	339	0.882006	1_day_old
TTCGCGGC_CAGCAACG_TAACGATT_AATAACGT	895	1010	0.886139	1_day_old
TTCGCGGC_CAGCAACG_GTCCTTCG_AATTCTAA	534	605	0.882645	1_day_old
TTCGCGGC_CAGCAACG_ATGTAGAC_GTCACGTC	222	260	0.853846	1_day_old
TTCGCGGC_CAGCAACG_AAGGAATC_GCGGTTAA	143	153	0.934641	1_day_old
TTCGCGGC_ATTGGGTC_CATTGTGG_CCATTGTG	2559	2867	0.892571	1_day_old
TTCGCGGC_ATTGGGTC_AAGGAATC_AATTCTAA	594	687	0.864629	1_day_old
TTCGCGGC_ATTGGGTC_AAGGAATC_AATAACGT	655	730	0.89726	1_day_old
TTCGCGGC_ATTACCGT_ATGTAGAC_GCGGTTAA	531	596	0.89094	1_day_old
TTCGCGGC_ATTACCGT_AAGGAATC_AATAACGT	711	823	0.863913	1_day_old
TTCGCGGC_ATGGTCAT_TAACGATT_GCGGTTAA	108	122	0.885246	1_day_old
TTCGCGGC_ATGGTCAT_GTCCTTCG_TTACGCCG	449	496	0.905242	1_day_old
TTCGCGGC_ATGGTCAT_GTCCTTCG_GTCACGTC	147	173	0.849711	1_day_old
TTCGCGGC_ATGGTCAT_AAGGAATC_GCGGTTAA	653	743	0.878869	1_day_old
TTCGCGGC_ATCGAATG_GTCCTTCG_AATTCTAA	862	997	0.864594	1_day_old
TTCGCGGC_ATCCAGGA_AAGGAATC_CGGCGACA	383	433	0.884527	1_day_old
TTCGCGGC_AGTCCGAG_TCGACCGA_AATAACGT	1207	1419	0.850599	1_day_old
TTCGCGGC_AGTCCGAG_AAGGAATC_CGGCGACA	279	338	0.825444	1_day_old
TTCGCGGC_AGGTTGCC_GTCCTTCG_CGGCGACA	196	214	0.915888	1_day_old
TTCGCGGC_AGGTTGCC_GTCCTTCG_AATTCTAA	453	525	0.862857	1_day_old
TTCGCGGC_AGGTTGCC_ATGTAGAC_AATTCTAA	1074	1194	0.899497	1_day_old
TTCGCGGC_AGGTTGCC_AAGGAATC_AATTCTAA	107	121	0.884298	1_day_old
TTCGCGGC_AGCCGTTC_GTCCTTCG_TTACGCCG	2083	2389	0.871913	1_day_old
TTCGCGGC_AGCCGTTC_CATTGTGG_GTCACGTC	464	530	0.875472	1_day_old
TTCGCGGC_AGCCGTTC_ATGTAGAC_GCGGTTAA	1834	2132	0.860225	1_day_old
TTCGCGGC_AGCCGTTC_ATGTAGAC_CCATTGTG	591	655	0.90229	1_day_old
TTCGCGGC_AGAGATCT_AAGGAATC_GTCACGTC	114	135	0.844444	1_day_old
TTCGCGGC_ACTTGTTG_TAACGATT_CGGCGACA	279	315	0.885714	1_day_old
TTCGCGGC_ACTTAGAA_GTCCTTCG_GTCACGTC	522	611	0.854337	1_day_old
TTCGCGGC_ACTGCATA_TAACGATT_TTACGCCG	472	509	0.927308	1_day_old
TTCGCGGC_ACTGCATA_TAACGATT_GTCACGTC	531	613	0.866232	1_day_old
TTCGCGGC_ACTGCATA_TAACGATT_GCGGTTAA	635	707	0.898161	1_day_old
TTCGCGGC_ACTGCATA_ATGTAGAC_GTCACGTC	763	912	0.836623	1_day_old
TTCGCGGC_ACTGCATA_AAGGAATC_CGGCGACA	1575	1834	0.858779	1_day_old
TTCGCGGC_ACGCGCAG_ATGTAGAC_GTCACGTC	226	265	0.85283	1_day_old
TTCGCGGC_ACGCGCAG_AAGGAATC_TGCGAAGT	152	168	0.904762	1_day_old
TTCGCGGC_ACGCGCAG_AAGGAATC_CCATTGTG	167	198	0.843434	1_day_old
TTCGCGGC_ACGATAAC_GTCCTTCG_TTACGCCG	93	103	0.902913	1_day_old
TTCGCGGC_ACGATAAC_GTCCTTCG_CCATTGTG	471	536	0.878731	1_day_old
TTCGCGGC_ACGATAAC_AAGGAATC_GTCACGTC	744	850	0.875294	1_day_old
TTCGCGGC_ACGATAAC_AAGGAATC_CGGCGACA	163	198	0.823232	1_day_old
TTCGCGGC_ACCGGCCC_ATGTAGAC_CCATTGTG	853	987	0.864235	1_day_old
TTCGCGGC_ACATTCGT_GTCCTTCG_AATTCTAA	204	229	0.89083	1_day_old
TTCGCGGC_ACATTCGT_GTCCTTCG_AATAACGT	167	184	0.907609	1_day_old
TTCGCGGC_ACATTCGT_AAGGAATC_GCGGTTAA	637	784	0.8125	1_day_old
TTCGCGGC_ACATTCGT_AAGGAATC_CCATTGTG	90	101	0.891089	1_day_old
TTCGCGGC_AATCTACA_TAACGATT_GTCACGTC	420	508	0.826772	1_day_old
TTCGCGGC_AATCTACA_TAACGATT_AATAACGT	335	384	0.872396	1_day_old
TTCGCGGC_AATCTACA_GTCCTTCG_TTACGCCG	1690	1910	0.884817	1_day_old
TTCGCGGC_AATCTACA_GTCCTTCG_CGGCGACA	1027	1138	0.90246	1_day_old
TTCGCGGC_AATCTACA_CGAGCGCT_AATTCTAA	3390	3931	0.862376	1_day_old
TTCGCGGC_AATCTACA_ATGTAGAC_TGCGAAGT	574	645	0.889922	1_day_old
TTCGCGGC_AAGGAGTA_TAACGATT_AATAACGT	466	514	0.906615	1_day_old
TTCGCGGC_AAGGAGTA_GTCCTTCG_GTCACGTC	705	801	0.88015	1_day_old
TTCGCGGC_AAGGAGTA_AAGGAATC_CCATTGTG	1401	1604	0.873441	1_day_old
TTCGCGGC_AACATGAT_GTCCTTCG_TTACGCCG	216	237	0.911392	1_day_old
TTCGCGGC_AACATGAT_GTCCTTCG_TGCGAAGT	269	299	0.899666	1_day_old
TTCGCGGC_AACATGAT_GTCCTTCG_GCGGTTAA	540	624	0.865385	1_day_old
TTCGCGGC_AACATGAT_AAGGAATC_AATTCTAA	768	872	0.880734	1_day_old
TTCCATAT_TTTCTAGC_GTTATCCG_CCATTGTG	3312	3776	0.877119	1_day_old
TTCCATAT_TTTCTAGC_GTCCTTCG_CGGCGACA	105	129	0.813953	1_day_old
TTCCATAT_TTTCTAGC_GTCCTTCG_CGGCGACA	161	191	0.842932	1_day_old
TTCCATAT_TTTCTAGC_AAGGAATC_GTCACGTC	321	384	0.835938	1_day_old
TTCCATAT_TTTCTAGC_AAGGAATC_GCGGTTAA	805	939	0.857295	1_day_old
TTCCATAT_TTTCTAGC_AAGGAATC_CCATTGTG	179	207	0.864734	1_day_old
TTCCATAT_TTGCCTAA_AAGGAATC_CGGCGACA	150	176	0.852273	1_day_old
TTCCATAT_TTCGTGCA_GTCCTTCG_AATAACGT	118	126	0.936508	1_day_old
TTCCATAT_TTCGTGCA_AAGGAATC_GCGGTTAA	468	532	0.879699	1_day_old
TTCCATAT_TTAACTTG_GTCCTTCG_CGGCGACA	614	717	0.856346	1_day_old
TTCCATAT_TGTTCCTG_GTCCTTCG_TTACGCCG	1218	1375	0.885818	1_day_old
TTCCATAT_TGTTCCTG_AAGGAATC_TTACGCCG	1453	1662	0.874248	1_day_old
TTCCATAT_TGGGCGGT_CGAGCGCT_TTACGCCG	129	154	0.837662	1_day_old
TTCCATAT_TGGGCGGT_ATGTAGAC_CGGCGACA	1184	1329	0.890895	1_day_old
TTCCATAT_TGGAAATC_ATGTAGAC_TGCGAAGT	616	700	0.88	1_day_old
TTCCATAT_TGCATACT_GTCCTTCG_AATAACGT	1775	2032	0.873524	1_day_old
TTCCATAT_TGATTGTT_GTCCTTCG_TGCGAAGT	725	836	0.867225	1_day_old
TTCCATAT_TGATTGTT_GTCCTTCG_CGGCGACA	636	761	0.835742	1_day_old
TTCCATAT_TGATTGTT_CATTGTGG_GTCACGTC	1104	1293	0.853828	1_day_old
TTCCATAT_TGATTGTT_AAGGAATC_GCGGTTAA	217	252	0.861111	1_day_old
TTCCATAT_TGATTGTT_AAGGAATC_CCATTGTG	158	183	0.863388	1_day_old
TTCCATAT_TGATGAAA_GTCCTTCG_GCGGTTAA	655	769	0.851756	1_day_old
TTCCATAT_TGATGAAA_GTCCTTCG_AATTCTAA	3176	3627	0.875655	1_day_old
TTCCATAT_TGATGAAA_CGAGCGCT_CGGCGACA	2619	3063	0.855044	1_day_old
TTCCATAT_TGATGAAA_ATGTAGAC_GCGGTTAA	134	160	0.8375	1_day_old
TTCCATAT_TGATGAAA_AAGGAATC_GCGGTTAA	1129	1283	0.879969	1_day_old
TTCCATAT_TGATGAAA_AAGGAATC_CCATTGTG	2558	2969	0.86157	1_day_old
TTCCATAT_TGATGAAA_AAGGAATC_AATTCTAA	104	124	0.83871	1_day_old
TTCCATAT_TCTGGCGA_TAACGATT_CGGCGACA	386	446	0.865471	1_day_old
TTCCATAT_TCTGGCGA_CGAGCGCT_CCATTGTG	5386	6254	0.861209	1_day_old
TTCCATAT_TCTGGCGA_ATGTAGAC_AATTCTAA	667	777	0.85843	1_day_old
TTCCATAT_TCTGGCGA_ATGTAGAC_AATAACGT	1885	2153	0.875523	1_day_old
TTCCATAT_TCTGGCGA_AAGGAATC_GCGGTTAA	2530	3018	0.838304	1_day_old
TTCCATAT_TCCGAGTT_TAACGATT_GTCACGTC	407	463	0.87905	1_day_old
TTCCATAT_TCCGAGTT_CGAGCGCT_TGCGAAGT	138	162	0.851852	1_day_old
TTCCATAT_TCCATCAA_TAACGATT_TTACGCCG	151	181	0.834254	1_day_old
TTCCATAT_TCCATCAA_TAACGATT_CGGCGACA	299	332	0.900602	1_day_old
TTCCATAT_TCCATCAA_GTCCTTCG_AATTCTAA	761	874	0.870709	1_day_old
TTCCATAT_TCCATCAA_AAGGAATC_GTCACGTC	186	205	0.907317	1_day_old
TTCCATAT_TCACATGG_TAACGATT_GTCACGTC	255	297	0.858586	1_day_old
TTCCATAT_TCACATGG_GTCCTTCG_CGGCGACA	1239	1439	0.861015	1_day_old
TTCCATAT_TCAAGAGC_GTCCTTCG_AATTCTAA	101	110	0.918182	1_day_old
TTCCATAT_TATTTGCG_GTCCTTCG_TGCGAAGT	136	159	0.855346	1_day_old
TTCCATAT_TATTTGCG_AAGGAATC_AATAACGT	567	637	0.89011	1_day_old
TTCCATAT_TATCCTCT_TAACGATT_GCGGTTAA	185	204	0.906863	1_day_old
TTCCATAT_TATCCTCT_GTCCTTCG_GCGGTTAA	159	186	0.854839	1_day_old
TTCCATAT_TATCCTCT_AAGGAATC_TGCGAAGT	717	811	0.884094	1_day_old
TTCCATAT_TATCCTCT_AAGGAATC_GCGGTTAA	206	232	0.887931	1_day_old
TTCCATAT_TAGATCGC_CGAGCGCT_AATTCTAA	3670	4271	0.859284	1_day_old
TTCCATAT_TAGATCGC_ATGTAGAC_GTCACGTC	1771	2040	0.868137	1_day_old
TTCCATAT_TAGATCGC_AAGGAATC_AATAACGT	4776	5544	0.861472	1_day_old
TTCCATAT_TACTGACC_TAACGATT_CGGCGACA	1314	1494	0.879518	1_day_old
TTCCATAT_TACTGACC_CATTGTGG_GTCACGTC	1323	1544	0.856865	1_day_old
TTCCATAT_TACTGACC_ATGTAGAC_CGGCGACA	1032	1200	0.86	1_day_old
TTCCATAT_TACTGACC_AAGGAATC_CCATTGTG	523	595	0.878992	1_day_old
TTCCATAT_TAAGTTAC_TCGACCGA_AATAACGT	1590	1861	0.854379	1_day_old
TTCCATAT_TAAGTTAC_ATGTAGAC_GTCACGTC	108	119	0.907563	1_day_old
TTCCATAT_TAACCAAG_ATGTAGAC_CCATTGTG	666	728	0.914835	1_day_old
TTCCATAT_TAACCAAG_AAGGAATC_TTACGCCG	906	1037	0.873674	1_day_old
TTCCATAT_TAACCAAG_AAGGAATC_AATTCTAA	1438	1637	0.878436	1_day_old
TTCCATAT_GTGTATCG_GTCCTTCG_AATTCTAA	332	374	0.887701	1_day_old
TTCCATAT_GTGTATCG_CGAGCGCT_TGCGAAGT	1521	1791	0.849246	1_day_old
TTCCATAT_GTGTATCG_CGAGCGCT_CGGCGACA	256	303	0.844884	1_day_old
TTCCATAT_GTGTATCG_ATGTAGAC_TGCGAAGT	308	347	0.887608	1_day_old
TTCCATAT_GTGTATCG_ATGTAGAC_GTCACGTC	419	462	0.906926	1_day_old
TTCCATAT_GTGTATCG_ATGTAGAC_GCGGTTAA	2308	2620	0.880916	1_day_old
TTCCATAT_GTGTATCG_AAGGAATC_CCATTGTG	334	399	0.837093	1_day_old
TTCCATAT_GTCGGACT_GTCCTTCG_GTCACGTC	1336	1496	0.893048	1_day_old
TTCCATAT_GTCGGACT_ATGTAGAC_GTCACGTC	693	813	0.852399	1_day_old
TTCCATAT_GTCGGACT_AAGGAATC_CCATTGTG	542	595	0.910924	1_day_old
TTCCATAT_GTCGGACT_AAGGAATC_AATAACGT	100	112	0.892857	1_day_old
TTCCATAT_GTAAGGAG_TAACGATT_GCGGTTAA	98	114	0.859649	1_day_old
TTCCATAT_GTAAGGAG_TAACGATT_AATTCTAA	733	835	0.877844	1_day_old
TTCCATAT_GTAAGGAG_CATTGTGG_GCGGTTAA	4692	5647	0.830884	1_day_old
TTCCATAT_GGTTCAAT_TAACGATT_GTCACGTC	338	376	0.898936	1_day_old
TTCCATAT_GGTTCAAT_GTCCTTCG_TTACGCCG	184	208	0.884615	1_day_old
TTCCATAT_GGTTCAAT_AAGGAATC_TGCGAAGT	1101	1231	0.894395	1_day_old
TTCCATAT_GGTGAAGG_GTCCTTCG_GTCACGTC	639	733	0.87176	1_day_old
TTCCATAT_GGTGAAGG_ATGTAGAC_TGCGAAGT	1306	1485	0.879461	1_day_old
TTCCATAT_GGTGAAGG_AAGGAATC_TTACGCCG	139	168	0.827381	1_day_old
TTCCATAT_GGCACGGA_TAACGATT_TTACGCCG	232	259	0.895753	1_day_old
TTCCATAT_GGCACGGA_GTCCTTCG_TTACGCCG	1229	1376	0.893169	1_day_old
TTCCATAT_GGCACGGA_GTCCTTCG_AATAACGT	1281	1432	0.894553	1_day_old
TTCCATAT_GGCACGGA_CATTGTGG_GTCACGTC	3394	3957	0.85772	1_day_old
TTCCATAT_GGCACGGA_AAGGAATC_TTACGCCG	1585	1827	0.867542	1_day_old
TTCCATAT_GCCCACGT_ATGTAGAC_CGGCGACA	87	101	0.861386	1_day_old
TTCCATAT_GCCCACGT_AAGGAATC_TTACGCCG	684	776	0.881443	1_day_old
TTCCATAT_GCATTAAG_GTCCTTCG_TGCGAAGT	108	113	0.955752	1_day_old
TTCCATAT_GCATTAAG_GTCCTTCG_CCATTGTG	167	196	0.852041	1_day_old
TTCCATAT_GCATTAAG_GTCCTTCG_AATAACGT	419	532	0.787594	1_day_old
TTCCATAT_GCAGCCTC_CATTGTGG_AATAACGT	235	274	0.857664	1_day_old
TTCCATAT_GCAAATTT_TAACGATT_TTACGCCG	1355	1544	0.877591	1_day_old
TTCCATAT_GCAAATTT_TAACGATT_GTCACGTC	253	318	0.795597	1_day_old
TTCCATAT_GCAAATTT_CGAGCGCT_TGCGAAGT	5881	6989	0.841465	1_day_old
TTCCATAT_GCAAATTT_AAGGAATC_TGCGAAGT	99	106	0.933962	1_day_old
TTCCATAT_GATTCCCA_GTCCTTCG_TGCGAAGT	555	624	0.889423	1_day_old
TTCCATAT_GATTCCCA_ATGTAGAC_TTACGCCG	340	379	0.897098	1_day_old
TTCCATAT_GATTCCCA_AAGGAATC_CCATTGTG	729	804	0.906716	1_day_old
TTCCATAT_GATCATTC_TAACGATT_AATAACGT	707	787	0.898348	1_day_old
TTCCATAT_GATCATTC_ATGTAGAC_CCATTGTG	273	320	0.853125	1_day_old
TTCCATAT_GATCATTC_AAGGAATC_GCGGTTAA	135	150	0.9	1_day_old
TTCCATAT_GAGACGTG_TCGACCGA_AATAACGT	3337	3839	0.869237	1_day_old
TTCCATAT_GAGACGTG_TAACGATT_CGGCGACA	850	946	0.89852	1_day_old
TTCCATAT_GAGACGTG_AAGGAATC_CGGCGACA	400	449	0.890869	1_day_old
TTCCATAT_GACGTGGC_GTCCTTCG_CCATTGTG	141	168	0.839286	1_day_old
TTCCATAT_GACGTGGC_AAGGAATC_TGCGAAGT	1613	1830	0.881421	1_day_old
TTCCATAT_GAACTCGA_TAACGATT_CGGCGACA	542	605	0.895868	1_day_old
TTCCATAT_GAACTCGA_GTCCTTCG_GTCACGTC	711	803	0.88543	1_day_old
TTCCATAT_GAACTCGA_ATGTAGAC_GTCACGTC	695	774	0.897933	1_day_old
TTCCATAT_GAACTCGA_ATGTAGAC_AATTCTAA	1751	1984	0.88256	1_day_old
TTCCATAT_GAACTCGA_AAGGAATC_CCATTGTG	469	540	0.868519	1_day_old
TTCCATAT_CTTTAACA_GTCCTTCG_GCGGTTAA	1358	1544	0.879534	1_day_old
TTCCATAT_CTCTCTAT_ATGTAGAC_TTACGCCG	183	212	0.863208	1_day_old
TTCCATAT_CTCTCTAT_ATGTAGAC_TGCGAAGT	458	566	0.809187	1_day_old
TTCCATAT_CTCTCTAT_AAGGAATC_TGCGAAGT	96	111	0.864865	1_day_old
TTCCATAT_CTAGAAGT_TAACGATT_AATTCTAA	432	491	0.879837	1_day_old
TTCCATAT_CTAGAAGT_CGAGCGCT_CGGCGACA	108	125	0.864	1_day_old
TTCCATAT_CTAGAAGT_AAGGAATC_CGGCGACA	287	332	0.864458	1_day_old
TTCCATAT_CGTAGACC_GTCCTTCG_AATTCTAA	641	735	0.872109	1_day_old
TTCCATAT_CGTAGACC_AAGGAATC_GTCACGTC	671	758	0.885224	1_day_old
TTCCATAT_CGTAGACC_AAGGAATC_AATTCTAA	180	200	0.9	1_day_old
TTCCATAT_CGTACCAA_GTCCTTCG_GTCACGTC	180	214	0.841121	1_day_old
TTCCATAT_CGGACTGC_AAGGAATC_AATAACGT	3941	4422	0.891226	1_day_old
TTCCATAT_CGCCAGAT_TAACGATT_AATAACGT	3744	4184	0.894837	1_day_old
TTCCATAT_CGCCAGAT_GTCCTTCG_AATAACGT	258	310	0.832258	1_day_old
TTCCATAT_CGATAGGG_TAACGATT_GTCACGTC	577	639	0.902973	1_day_old
TTCCATAT_CGATAGGG_TAACGATT_CCATTGTG	476	534	0.891386	1_day_old
TTCCATAT_CCTTATGT_ATGTAGAC_GTCACGTC	158	191	0.827225	1_day_old
TTCCATAT_CCTGCGGG_GTCCTTCG_GTCACGTC	117	136	0.860294	1_day_old
TTCCATAT_CCTGCGGG_ATGTAGAC_TGCGAAGT	226	258	0.875969	1_day_old
TTCCATAT_CCTGCGGG_AAGGAATC_CGGCGACA	535	624	0.857372	1_day_old
TTCCATAT_CCCTTGGA_GTCCTTCG_AATTCTAA	3958	4476	0.884272	1_day_old
TTCCATAT_CCAGTTTA_GTCCTTCG_TGCGAAGT	539	612	0.880719	1_day_old
TTCCATAT_CCAGTTTA_AAGGAATC_AATAACGT	326	389	0.838046	1_day_old
TTCCATAT_CCAGTTTA_AAGGAATC_AATAACGT	141	155	0.909677	1_day_old
TTCCATAT_CAGCAACG_GTCCTTCG_TTACGCCG	3343	3870	0.863824	1_day_old
TTCCATAT_CAGCAACG_AAGGAATC_CCATTGTG	669	746	0.896783	1_day_old
TTCCATAT_ATTGGGTC_ATGTAGAC_CGGCGACA	851	946	0.899577	1_day_old
TTCCATAT_ATTGGGTC_ATGTAGAC_AATAACGT	795	917	0.866957	1_day_old
TTCCATAT_ATTGGGTC_AAGGAATC_TGCGAAGT	1386	1586	0.873897	1_day_old
TTCCATAT_ATTACCGT_ATGTAGAC_TGCGAAGT	750	850	0.882353	1_day_old
TTCCATAT_ATTACCGT_ATGTAGAC_CGGCGACA	324	372	0.870968	1_day_old
TTCCATAT_ATGGTCAT_TAACGATT_GCGGTTAA	1675	1943	0.862069	1_day_old
TTCCATAT_ATGGTCAT_GTCCTTCG_CGGCGACA	472	527	0.895636	1_day_old
TTCCATAT_ATGGTCAT_AAGGAATC_CCATTGTG	409	489	0.836401	1_day_old
TTCCATAT_ATGGTCAT_AAGGAATC_AATAACGT	104	114	0.912281	1_day_old
TTCCATAT_ATCGAATG_GTCCTTCG_TTACGCCG	238	258	0.922481	1_day_old
TTCCATAT_ATCGAATG_GTCCTTCG_GCGGTTAA	3921	4420	0.887104	1_day_old
TTCCATAT_ATCGAATG_GTCCTTCG_AATAACGT	827	903	0.915836	1_day_old
TTCCATAT_ATCCAGGA_TCGACCGA_GTCACGTC	2874	3423	0.839614	1_day_old
TTCCATAT_ATCCAGGA_AAGGAATC_AATAACGT	626	701	0.89301	1_day_old
TTCCATAT_AGTCCGAG_AAGGAATC_GTCACGTC	1507	1745	0.86361	1_day_old
TTCCATAT_AGGTTGCC_TCGACCGA_GTCACGTC	4539	5275	0.860474	1_day_old
TTCCATAT_AGGTTGCC_TAACGATT_CGGCGACA	1733	1985	0.873048	1_day_old
TTCCATAT_AGGTTGCC_ATGTAGAC_AATAACGT	114	122	0.934426	1_day_old
TTCCATAT_AGCCGTTC_GTCCTTCG_GCGGTTAA	1427	1620	0.880864	1_day_old
TTCCATAT_AGAGTAGA_GTTATCCG_GTCACGTC	1611	1861	0.865664	1_day_old
TTCCATAT_AGAGTAGA_AAGGAATC_TTACGCCG	1143	1347	0.848552	1_day_old
TTCCATAT_AGAGTAGA_AAGGAATC_CCATTGTG	445	527	0.844402	1_day_old
TTCCATAT_AGAGATCT_TAACGATT_GCGGTTAA	688	808	0.851485	1_day_old
TTCCATAT_AGAGATCT_GTCCTTCG_GCGGTTAA	131	147	0.891156	1_day_old
TTCCATAT_AGAGATCT_GTCCTTCG_CCATTGTG	98	110	0.890909	1_day_old
TTCCATAT_AGAGATCT_ATGTAGAC_GTCACGTC	195	232	0.840517	1_day_old
TTCCATAT_AGAGATCT_AAGGAATC_TTACGCCG	722	819	0.881563	1_day_old
TTCCATAT_ACTTGTTG_TAACGATT_CGGCGACA	120	136	0.882353	1_day_old
TTCCATAT_ACTTGTTG_TAACGATT_AATTCTAA	2761	3147	0.877344	1_day_old
TTCCATAT_ACTTGTTG_ATGTAGAC_GTCACGTC	256	300	0.853333	1_day_old
TTCCATAT_ACTTGTTG_ATGTAGAC_GCGGTTAA	651	727	0.895461	1_day_old
TTCCATAT_ACTTAGAA_GTCCTTCG_AATAACGT	141	169	0.83432	1_day_old
TTCCATAT_ACTTAGAA_AAGGAATC_GTCACGTC	100	122	0.819672	1_day_old
TTCCATAT_ACTGCATA_GTCCTTCG_AATTCTAA	299	350	0.854286	1_day_old
TTCCATAT_ACTGCATA_GTCCTTCG_AATTCTAA	169	191	0.884817	1_day_old
TTCCATAT_ACTGCATA_ATGTAGAC_TTACGCCG	1791	2037	0.879234	1_day_old
TTCCATAT_ACTGCATA_AAGGAATC_TGCGAAGT	818	940	0.870213	1_day_old
TTCCATAT_ACTGCATA_AAGGAATC_AATTCTAA	530	579	0.915371	1_day_old
TTCCATAT_ACGCGCAG_GTCCTTCG_TTACGCCG	487	579	0.841105	1_day_old
TTCCATAT_ACGCGCAG_CGAGCGCT_TTACGCCG	775	975	0.794872	1_day_old
TTCCATAT_ACGATAAC_GTCCTTCG_TTACGCCG	194	213	0.910798	1_day_old
TTCCATAT_ACGATAAC_GTCCTTCG_AATAACGT	140	162	0.864198	1_day_old
TTCCATAT_ACGATAAC_AAGGAATC_AATTCTAA	367	413	0.88862	1_day_old
TTCCATAT_ACCGGCCC_GTTATCCG_TGCGAAGT	1443	1687	0.855365	1_day_old
TTCCATAT_ACCGGCCC_AAGGAATC_CCATTGTG	124	142	0.873239	1_day_old
TTCCATAT_ACCGGCCC_AAGGAATC_AATTCTAA	2826	3280	0.861585	1_day_old
TTCCATAT_ACATTCGT_AAGGAATC_GCGGTTAA	876	971	0.902163	1_day_old
TTCCATAT_AATCTACA_AAGGAATC_TGCGAAGT	1206	1337	0.902019	1_day_old
TTCCATAT_AAGGAGTA_TAACGATT_CGGCGACA	457	521	0.877159	1_day_old
TTCCATAT_AAGGAGTA_GTCCTTCG_TGCGAAGT	523	573	0.91274	1_day_old
TTCCATAT_AAGGAGTA_ATGTAGAC_GTCACGTC	846	968	0.873967	1_day_old
TTCCATAT_AACATGAT_ATGTAGAC_TTACGCCG	2085	2342	0.890265	1_day_old
TTCCATAT_AACATGAT_AAGGAATC_GTCACGTC	1281	1433	0.893929	1_day_old
TTCCATAT_AACATGAT_AAGGAATC_AATAACGT	984	1109	0.887286	1_day_old
TTATGAAA_TTTCTAGC_ATGTAGAC_CCATTGTG	1310	1501	0.872751	1_day_old
TTATGAAA_TTTCTAGC_AAGGAATC_TGCGAAGT	87	101	0.861386	1_day_old
TTATGAAA_TTTCTAGC_AAGGAATC_GTCACGTC	612	680	0.9	1_day_old
TTATGAAA_TTGCCTAA_TAACGATT_CCATTGTG	257	290	0.886207	1_day_old
TTATGAAA_TTGCCTAA_GTCCTTCG_TGCGAAGT	104	122	0.852459	1_day_old
TTATGAAA_TTGCCTAA_GTCCTTCG_CGGCGACA	150	178	0.842697	1_day_old
TTATGAAA_TTGCCTAA_ATGTAGAC_CGGCGACA	530	611	0.86743	1_day_old
TTATGAAA_TTAACTTG_TAACGATT_CCATTGTG	1286	1479	0.869506	1_day_old
TTATGAAA_TTAACTTG_AAGGAATC_TTACGCCG	1180	1358	0.868925	1_day_old
TTATGAAA_TGTTCCTG_ATGTAGAC_CGGCGACA	125	134	0.932836	1_day_old
TTATGAAA_TGTTCCTG_ATGTAGAC_CCATTGTG	973	1073	0.906803	1_day_old
TTATGAAA_TGTTCCTG_AAGGAATC_TGCGAAGT	262	293	0.894198	1_day_old
TTATGAAA_TGCATACT_GTCCTTCG_TGCGAAGT	437	509	0.858546	1_day_old
TTATGAAA_TGCATACT_GTCCTTCG_GCGGTTAA	644	736	0.875	1_day_old
TTATGAAA_TGCATACT_ATGTAGAC_AATTCTAA	955	1047	0.91213	1_day_old
TTATGAAA_TGATTGTT_GTCCTTCG_CCATTGTG	580	675	0.859259	1_day_old
TTATGAAA_TGATTGTT_CATTGTGG_GTCACGTC	795	905	0.878453	1_day_old
TTATGAAA_TCCGAGTT_GTCCTTCG_GCGGTTAA	503	573	0.877836	1_day_old
TTATGAAA_TCCGAGTT_GTCCTTCG_CCATTGTG	706	824	0.856796	1_day_old
TTATGAAA_TCCGAGTT_GTCCTTCG_AATAACGT	149	171	0.871345	1_day_old
TTATGAAA_TCACATGG_GTCCTTCG_GTCACGTC	402	448	0.897321	1_day_old
TTATGAAA_TCACATGG_ATGTAGAC_GCGGTTAA	824	923	0.892741	1_day_old
TTATGAAA_TATTTGCG_TAACGATT_TGCGAAGT	521	595	0.87563	1_day_old
TTATGAAA_TATTTGCG_GTCCTTCG_TTACGCCG	569	648	0.878086	1_day_old
TTATGAAA_TATCCTCT_ATGTAGAC_GTCACGTC	165	191	0.863874	1_day_old
TTATGAAA_TAGATCGC_GTCCTTCG_GCGGTTAA	192	207	0.927536	1_day_old
TTATGAAA_TAAGTTAC_GTTATCCG_AATTCTAA	313	375	0.834667	1_day_old
TTATGAAA_TAAGTTAC_GTCCTTCG_CCATTGTG	1390	1652	0.841404	1_day_old
TTATGAAA_TAAGTTAC_GTCCTTCG_AATAACGT	665	790	0.841772	1_day_old
TTATGAAA_TAAGTTAC_ATGTAGAC_GTCACGTC	1038	1182	0.878173	1_day_old
TTATGAAA_TAAGTTAC_AAGGAATC_GTCACGTC	145	170	0.852941	1_day_old
TTATGAAA_GTGTATCG_AAGGAATC_TGCGAAGT	330	375	0.88	1_day_old
TTATGAAA_GTCGGACT_TAACGATT_CGGCGACA	1174	1321	0.888721	1_day_old
TTATGAAA_GTCGGACT_CGAGCGCT_CGGCGACA	713	802	0.889027	1_day_old
TTATGAAA_GTAAGGAG_GTCCTTCG_AATTCTAA	1144	1303	0.877974	1_day_old
TTATGAAA_GGTTCAAT_GTTATCCG_CGGCGACA	1605	1930	0.831606	1_day_old
TTATGAAA_GGTTCAAT_AAGGAATC_AATTCTAA	91	101	0.90099	1_day_old
TTATGAAA_GGTGAAGG_TAACGATT_GCGGTTAA	486	560	0.867857	1_day_old
TTATGAAA_GGTGAAGG_GTCCTTCG_CGGCGACA	1564	1780	0.878652	1_day_old
TTATGAAA_GGGCTTGG_GTCCTTCG_AATTCTAA	843	980	0.860204	1_day_old
TTATGAAA_GGGCTTGG_ATGTAGAC_AATAACGT	179	213	0.840376	1_day_old
TTATGAAA_GGGCTTGG_AAGGAATC_TGCGAAGT	292	335	0.871642	1_day_old
TTATGAAA_GGCACGGA_AAGGAATC_TGCGAAGT	475	545	0.87156	1_day_old
TTATGAAA_GCATTAAG_GTCCTTCG_CGGCGACA	372	417	0.892086	1_day_old
TTATGAAA_GCAGCCTC_TCGACCGA_AATTCTAA	5996	6923	0.866099	1_day_old
TTATGAAA_GCAGCCTC_GTTATCCG_GTCACGTC	1961	2230	0.879372	1_day_old
TTATGAAA_GCAGCCTC_ATGTAGAC_TTACGCCG	833	958	0.86952	1_day_old
TTATGAAA_GCAGCCTC_ATGTAGAC_CGGCGACA	272	324	0.839506	1_day_old
TTATGAAA_GCAGCCTC_AAGGAATC_GCGGTTAA	912	1035	0.881159	1_day_old
TTATGAAA_GCAAATTT_GTCCTTCG_TTACGCCG	839	943	0.889714	1_day_old
TTATGAAA_GCAAATTT_AAGGAATC_CGGCGACA	732	835	0.876647	1_day_old
TTATGAAA_GCAAATTT_AAGGAATC_CCATTGTG	338	376	0.898936	1_day_old
TTATGAAA_GATTCCCA_TAACGATT_AATTCTAA	311	349	0.891117	1_day_old
TTATGAAA_GATCATTC_ATGTAGAC_GTCACGTC	169	187	0.903743	1_day_old
TTATGAAA_GAGACGTG_GTCCTTCG_TTACGCCG	149	179	0.832402	1_day_old
TTATGAAA_GAGACGTG_GTCCTTCG_TGCGAAGT	577	673	0.857355	1_day_old
TTATGAAA_GAGACGTG_AAGGAATC_TTACGCCG	1279	1446	0.884509	1_day_old
TTATGAAA_GACGTGGC_ATGTAGAC_GTCACGTC	841	977	0.860798	1_day_old
TTATGAAA_GACGTGGC_ATGTAGAC_AATTCTAA	1457	1661	0.877182	1_day_old
TTATGAAA_GAACTCGA_TAACGATT_CCATTGTG	160	175	0.914286	1_day_old
TTATGAAA_GAACTCGA_AAGGAATC_CCATTGTG	132	156	0.846154	1_day_old
TTATGAAA_CTTTAACA_TAACGATT_GTCACGTC	152	174	0.873563	1_day_old
TTATGAAA_CTTTAACA_AAGGAATC_GCGGTTAA	405	460	0.880435	1_day_old
TTATGAAA_CTCTCTAT_TAACGATT_TTACGCCG	140	163	0.858896	1_day_old
TTATGAAA_CTAGAAGT_TAACGATT_AATAACGT	194	222	0.873874	1_day_old
TTATGAAA_CTAAGCCT_TAACGATT_CCATTGTG	807	914	0.882932	1_day_old
TTATGAAA_CTAAGCCT_TAACGATT_AATAACGT	106	120	0.883333	1_day_old
TTATGAAA_CTAAGCCT_CATTGTGG_GTCACGTC	3159	3657	0.863823	1_day_old
TTATGAAA_CGGACTGC_GTCCTTCG_AATTCTAA	724	805	0.899379	1_day_old
TTATGAAA_CGGACTGC_ATGTAGAC_AATAACGT	753	862	0.87355	1_day_old
TTATGAAA_CGCCAGAT_CATTGTGG_TGCGAAGT	592	664	0.891566	1_day_old
TTATGAAA_CGCCAGAT_AAGGAATC_CCATTGTG	964	1212	0.79538	1_day_old
TTATGAAA_CGCCAGAT_AAGGAATC_CCATTGTG	2289	2715	0.843094	1_day_old
TTATGAAA_CGATAGGG_GTCCTTCG_TTACGCCG	175	207	0.845411	1_day_old
TTATGAAA_CGATAGGG_ATGTAGAC_GCGGTTAA	802	914	0.877462	1_day_old
TTATGAAA_CCTGCGGG_AAGGAATC_CGGCGACA	744	881	0.844495	1_day_old
TTATGAAA_CCCTTGGA_GTTATCCG_TTACGCCG	1899	2174	0.873505	1_day_old
TTATGAAA_CCCTTGGA_ATGTAGAC_CGGCGACA	804	909	0.884488	1_day_old
TTATGAAA_CCCTTGGA_AAGGAATC_CCATTGTG	115	129	0.891473	1_day_old
TTATGAAA_CCAGTTTA_TAACGATT_AATAACGT	160	181	0.883978	1_day_old
TTATGAAA_CCACCGTT_ATGTAGAC_CGGCGACA	767	875	0.876571	1_day_old
TTATGAAA_CAGCAACG_AAGGAATC_TTACGCCG	2556	2902	0.880772	1_day_old
TTATGAAA_ATTGGGTC_GTCCTTCG_AATAACGT	1229	1369	0.897736	1_day_old
TTATGAAA_ATTACCGT_ATGTAGAC_CGGCGACA	1429	1620	0.882099	1_day_old
TTATGAAA_ATGGTCAT_AAGGAATC_TGCGAAGT	1022	1163	0.878762	1_day_old
TTATGAAA_ATCGAATG_GTCCTTCG_GTCACGTC	765	876	0.873288	1_day_old
TTATGAAA_ATCGAATG_ATGTAGAC_TGCGAAGT	412	466	0.88412	1_day_old
TTATGAAA_ATCGAATG_AAGGAATC_AATAACGT	682	767	0.889179	1_day_old
TTATGAAA_AGTCCGAG_TAACGATT_AATAACGT	328	376	0.87234	1_day_old
TTATGAAA_AGTCCGAG_AAGGAATC_TGCGAAGT	113	128	0.882812	1_day_old
TTATGAAA_AGGTTGCC_ATGTAGAC_CGGCGACA	1554	1778	0.874016	1_day_old
TTATGAAA_AGCCGTTC_TAACGATT_GCGGTTAA	556	620	0.896774	1_day_old
TTATGAAA_AGCCGTTC_GTCCTTCG_GTCACGTC	1779	2082	0.854467	1_day_old
TTATGAAA_AGAGTAGA_AAGGAATC_AATAACGT	1648	1878	0.877529	1_day_old
TTATGAAA_AGAGATCT_TAACGATT_CCATTGTG	96	111	0.864865	1_day_old
TTATGAAA_ACTTGTTG_GTCCTTCG_AATTCTAA	234	274	0.854015	1_day_old
TTATGAAA_ACTTGTTG_ATGTAGAC_AATTCTAA	719	804	0.894279	1_day_old
TTATGAAA_ACTTGTTG_AAGGAATC_TTACGCCG	179	208	0.860577	1_day_old
TTATGAAA_ACTTGTTG_AAGGAATC_CCATTGTG	587	656	0.894817	1_day_old
TTATGAAA_ACTTAGAA_AAGGAATC_TGCGAAGT	921	1050	0.877143	1_day_old
TTATGAAA_ACTGCATA_GTCCTTCG_AATTCTAA	1043	1161	0.898363	1_day_old
TTATGAAA_ACGCGCAG_TAACGATT_GTCACGTC	380	413	0.920097	1_day_old
TTATGAAA_ACGCGCAG_TAACGATT_CCATTGTG	157	182	0.862637	1_day_old
TTATGAAA_ACGATAAC_ATGTAGAC_CCATTGTG	111	127	0.874016	1_day_old
TTATGAAA_ACCGGCCC_AAGGAATC_TTACGCCG	787	913	0.861993	1_day_old
TTATGAAA_ACCGGCCC_AAGGAATC_CCATTGTG	783	912	0.858553	1_day_old
TTATGAAA_ACATTCGT_GTCCTTCG_GTCACGTC	337	389	0.866324	1_day_old
TTATGAAA_AATCTACA_TAACGATT_TTACGCCG	2328	2684	0.867362	1_day_old
TTATGAAA_AATCTACA_GTCCTTCG_TTACGCCG	1184	1347	0.87899	1_day_old
TTATGAAA_AATCTACA_GTCCTTCG_CCATTGTG	975	1139	0.856014	1_day_old
TTATGAAA_AATCTACA_CATTGTGG_GCGGTTAA	1437	1644	0.874088	1_day_old
TTATGAAA_AATCTACA_ATGTAGAC_AATTCTAA	2168	2486	0.872084	1_day_old
TTATGAAA_AAGGAGTA_AAGGAATC_TTACGCCG	535	596	0.897651	1_day_old
TTATGAAA_AACATGAT_TAACGATT_GTCACGTC	539	603	0.893864	1_day_old
TTATGAAA_AACATGAT_AAGGAATC_TGCGAAGT	582	652	0.892638	1_day_old
TTATGAAA_AACATGAT_AAGGAATC_GTCACGTC	560	659	0.849772	1_day_old
TTATGAAA_AACATGAT_AAGGAATC_CCATTGTG	1004	1155	0.869264	1_day_old
TGTGCCTT_TTTCTAGC_GTCCTTCG_TTACGCCG	187	213	0.877934	1_day_old
TGTGCCTT_TTTCTAGC_GTCCTTCG_CCATTGTG	318	346	0.919075	1_day_old
TGTGCCTT_TTTCTAGC_GTCCTTCG_AATAACGT	2233	2486	0.89823	1_day_old
TGTGCCTT_TTTCTAGC_CGAGCGCT_AATTCTAA	874	1006	0.868787	1_day_old
TGTGCCTT_TTTCTAGC_ATGTAGAC_AATAACGT	2931	3346	0.875971	1_day_old
TGTGCCTT_TTGCCTAA_TAACGATT_CGGCGACA	333	368	0.904891	1_day_old
TGTGCCTT_TTGCCTAA_GTCCTTCG_CGGCGACA	246	279	0.88172	1_day_old
TGTGCCTT_TTGCCTAA_CGAGCGCT_GTCACGTC	2669	3028	0.88144	1_day_old
TGTGCCTT_TTGCCTAA_CGAGCGCT_AATAACGT	641	743	0.862719	1_day_old
TGTGCCTT_TTGCCTAA_AAGGAATC_CCATTGTG	1042	1188	0.877104	1_day_old
TGTGCCTT_TTCGTGCA_ATGTAGAC_AATAACGT	847	979	0.865169	1_day_old
TGTGCCTT_TTCGTGCA_AAGGAATC_AATTCTAA	266	325	0.818462	1_day_old
TGTGCCTT_TTAACTTG_ATGTAGAC_AATAACGT	3624	4106	0.882611	1_day_old
TGTGCCTT_TGTTCCTG_ATGTAGAC_CCATTGTG	654	717	0.912134	1_day_old
TGTGCCTT_TGTTCCTG_AAGGAATC_GTCACGTC	937	1067	0.878163	1_day_old
TGTGCCTT_TGGGCGGT_TAACGATT_TTACGCCG	655	743	0.881561	1_day_old
TGTGCCTT_TGGGCGGT_GTTATCCG_GTCACGTC	6178	7192	0.85901	1_day_old
TGTGCCTT_TGGAAATC_TAACGATT_CGGCGACA	323	361	0.894737	1_day_old
TGTGCCTT_TGGAAATC_GTCCTTCG_AATAACGT	2560	2943	0.869861	1_day_old
TGTGCCTT_TGGAAATC_AAGGAATC_GTCACGTC	1380	1560	0.884615	1_day_old
TGTGCCTT_TGCATACT_TCGACCGA_CCATTGTG	921	1067	0.863168	1_day_old
TGTGCCTT_TGCATACT_TAACGATT_GTCACGTC	679	793	0.856242	1_day_old
TGTGCCTT_TGCATACT_ATGTAGAC_AATTCTAA	834	949	0.87882	1_day_old
TGTGCCTT_TGATTGTT_TAACGATT_CGGCGACA	227	259	0.876448	1_day_old
TGTGCCTT_TGATTGTT_CGAGCGCT_GCGGTTAA	2979	3401	0.875919	1_day_old
TGTGCCTT_TGATGAAA_GTCCTTCG_GCGGTTAA	1078	1243	0.867257	1_day_old
TGTGCCTT_TGATGAAA_GTCCTTCG_CGGCGACA	107	123	0.869919	1_day_old
TGTGCCTT_TGATGAAA_GTCCTTCG_AATAACGT	1425	1600	0.890625	1_day_old
TGTGCCTT_TCTGGCGA_GTCCTTCG_AATTCTAA	1317	1479	0.890467	1_day_old
TGTGCCTT_TCTGGCGA_ATGTAGAC_CGGCGACA	179	211	0.848341	1_day_old
TGTGCCTT_TCTGGCGA_AAGGAATC_CGGCGACA	1149	1289	0.891389	1_day_old
TGTGCCTT_TCCGAGTT_GTCCTTCG_CGGCGACA	325	354	0.918079	1_day_old
TGTGCCTT_TCCGAGTT_CGAGCGCT_AATAACGT	207	245	0.844898	1_day_old
TGTGCCTT_TCCGAGTT_AAGGAATC_CGGCGACA	1043	1229	0.848657	1_day_old
TGTGCCTT_TCCATCAA_TAACGATT_TTACGCCG	2050	2356	0.870119	1_day_old
TGTGCCTT_TCCATCAA_CGAGCGCT_GCGGTTAA	1221	1380	0.884783	1_day_old
TGTGCCTT_TCCATCAA_CATTGTGG_GTCACGTC	464	553	0.83906	1_day_old
TGTGCCTT_TCCATCAA_AAGGAATC_GTCACGTC	1084	1253	0.865124	1_day_old
TGTGCCTT_TCACATGG_AAGGAATC_AATAACGT	1343	1545	0.869256	1_day_old
TGTGCCTT_TCAAGAGC_ATGTAGAC_TTACGCCG	471	520	0.905769	1_day_old
TGTGCCTT_TCAAGAGC_AAGGAATC_TTACGCCG	1860	2170	0.857143	1_day_old
TGTGCCTT_TATTTGCG_CGAGCGCT_TTACGCCG	6654	7719	0.862029	1_day_old
TGTGCCTT_TATTTGCG_ATGTAGAC_TTACGCCG	1010	1156	0.873702	1_day_old
TGTGCCTT_TATTTGCG_AAGGAATC_GCGGTTAA	124	136	0.911765	1_day_old
TGTGCCTT_TATCCTCT_TAACGATT_AATTCTAA	417	492	0.847561	1_day_old
TGTGCCTT_TATCCTCT_GTCCTTCG_TGCGAAGT	131	144	0.909722	1_day_old
TGTGCCTT_TATCCTCT_ATGTAGAC_TTACGCCG	1022	1171	0.872758	1_day_old
TGTGCCTT_TATCCTCT_AAGGAATC_TTACGCCG	162	174	0.931034	1_day_old
TGTGCCTT_TAGATCGC_GTCCTTCG_CCATTGTG	275	326	0.843558	1_day_old
TGTGCCTT_TACTGACC_TAACGATT_AATTCTAA	530	608	0.871711	1_day_old
TGTGCCTT_TACTGACC_ATGTAGAC_GTCACGTC	237	282	0.840426	1_day_old
TGTGCCTT_TACTGACC_AAGGAATC_CCATTGTG	797	943	0.845175	1_day_old
TGTGCCTT_TAAGTTAC_TAACGATT_CGGCGACA	309	335	0.922388	1_day_old
TGTGCCTT_TAAGTTAC_AAGGAATC_GTCACGTC	841	956	0.879707	1_day_old
TGTGCCTT_TAACCAAG_TAACGATT_GTCACGTC	2140	2454	0.872046	1_day_old
TGTGCCTT_TAACCAAG_CGAGCGCT_GTCACGTC	7651	8939	0.855912	1_day_old
TGTGCCTT_TAACCAAG_AAGGAATC_CCATTGTG	704	821	0.857491	1_day_old
TGTGCCTT_GTGTATCG_GTCCTTCG_TGCGAAGT	165	205	0.804878	1_day_old
TGTGCCTT_GTGTATCG_ATGTAGAC_GTCACGTC	751	852	0.881455	1_day_old
TGTGCCTT_GTGTATCG_AAGGAATC_TGCGAAGT	119	129	0.922481	1_day_old
TGTGCCTT_GTAAGGAG_TAACGATT_AATTCTAA	494	564	0.875887	1_day_old
TGTGCCTT_GTAAGGAG_GTCCTTCG_TGCGAAGT	92	107	0.859813	1_day_old
TGTGCCTT_GGTTCAAT_TAACGATT_AATAACGT	1023	1175	0.870638	1_day_old
TGTGCCTT_GGTTCAAT_AAGGAATC_GTCACGTC	115	138	0.833333	1_day_old
TGTGCCTT_GGTGAAGG_CATTGTGG_GTCACGTC	3303	3825	0.863529	1_day_old
TGTGCCTT_GGTGAAGG_AAGGAATC_GTCACGTC	186	201	0.925373	1_day_old
TGTGCCTT_GGGCTTGG_CATTGTGG_CGGCGACA	5556	6613	0.840163	1_day_old
TGTGCCTT_GGCACGGA_GTTATCCG_GCGGTTAA	4692	5513	0.851079	1_day_old
TGTGCCTT_GGCACGGA_CGAGCGCT_TTACGCCG	1088	1345	0.808922	1_day_old
TGTGCCTT_GCCCACGT_TAACGATT_AATAACGT	855	967	0.884178	1_day_old
TGTGCCTT_GCCCACGT_ATGTAGAC_GCGGTTAA	200	223	0.896861	1_day_old
TGTGCCTT_GCCCACGT_ATGTAGAC_AATAACGT	316	362	0.872928	1_day_old
TGTGCCTT_GCATTAAG_GTCCTTCG_GCGGTTAA	2263	2530	0.894466	1_day_old
TGTGCCTT_GCATTAAG_ATGTAGAC_TGCGAAGT	1373	1574	0.8723	1_day_old
TGTGCCTT_GCATTAAG_AAGGAATC_TTACGCCG	175	195	0.897436	1_day_old
TGTGCCTT_GCATTAAG_AAGGAATC_CCATTGTG	102	123	0.829268	1_day_old
TGTGCCTT_GCAGCCTC_TAACGATT_GTCACGTC	353	401	0.880299	1_day_old
TGTGCCTT_GCAGCCTC_TAACGATT_AATTCTAA	550	619	0.88853	1_day_old
TGTGCCTT_GCAGCCTC_GTCCTTCG_AATAACGT	223	251	0.888446	1_day_old
TGTGCCTT_GCAAATTT_GTCCTTCG_CGGCGACA	272	305	0.891803	1_day_old
TGTGCCTT_GCAAATTT_ATGTAGAC_GCGGTTAA	551	613	0.898858	1_day_old
TGTGCCTT_GATTCCCA_GTTATCCG_GTCACGTC	3413	3994	0.854532	1_day_old
TGTGCCTT_GATTCCCA_GTCCTTCG_AATTCTAA	201	230	0.873913	1_day_old
TGTGCCTT_GATCATTC_TAACGATT_CGGCGACA	1045	1199	0.87156	1_day_old
TGTGCCTT_GATCATTC_TAACGATT_AATTCTAA	158	180	0.877778	1_day_old
TGTGCCTT_GATCATTC_GTCCTTCG_TTACGCCG	547	610	0.896721	1_day_old
TGTGCCTT_GATCATTC_GTCCTTCG_AATAACGT	757	854	0.886417	1_day_old
TGTGCCTT_GATCATTC_AAGGAATC_GTCACGTC	173	195	0.887179	1_day_old
TGTGCCTT_GAGACGTG_GTTATCCG_GTCACGTC	1747	2063	0.846825	1_day_old
TGTGCCTT_GAGACGTG_GTCCTTCG_TTACGCCG	1877	2167	0.866174	1_day_old
TGTGCCTT_GAGACGTG_GTCCTTCG_CGGCGACA	251	282	0.890071	1_day_old
TGTGCCTT_GAGACGTG_AAGGAATC_GCGGTTAA	185	213	0.868545	1_day_old
TGTGCCTT_GACGTGGC_TAACGATT_GTCACGTC	104	117	0.888889	1_day_old
TGTGCCTT_GACGTGGC_AAGGAATC_TGCGAAGT	369	430	0.85814	1_day_old
TGTGCCTT_GAACTCGA_TAACGATT_CCATTGTG	111	131	0.847328	1_day_old
TGTGCCTT_CTTTAACA_TAACGATT_GCGGTTAA	274	314	0.872611	1_day_old
TGTGCCTT_CTTTAACA_GTCCTTCG_AATTCTAA	759	864	0.878472	1_day_old
TGTGCCTT_CTTTAACA_CATTGTGG_CCATTGTG	3654	4166	0.8771	1_day_old
TGTGCCTT_CTCTCTAT_GTCCTTCG_TGCGAAGT	222	256	0.867188	1_day_old
TGTGCCTT_CTCTCTAT_GTCCTTCG_GCGGTTAA	429	480	0.89375	1_day_old
TGTGCCTT_CTCTCTAT_ATGTAGAC_GTCACGTC	1107	1240	0.892742	1_day_old
TGTGCCTT_CTCTCTAT_ATGTAGAC_CCATTGTG	402	475	0.846316	1_day_old
TGTGCCTT_CTCTCTAT_AAGGAATC_TGCGAAGT	294	347	0.847262	1_day_old
TGTGCCTT_CTCTCTAT_AAGGAATC_CGGCGACA	549	621	0.884058	1_day_old
TGTGCCTT_CTAGAAGT_TAACGATT_GTCACGTC	569	637	0.89325	1_day_old
TGTGCCTT_CTAGAAGT_AAGGAATC_GTCACGTC	1043	1185	0.880169	1_day_old
TGTGCCTT_CTAGAAGT_AAGGAATC_GCGGTTAA	356	406	0.876847	1_day_old
TGTGCCTT_CTAAGCCT_CGAGCGCT_CCATTGTG	171	194	0.881443	1_day_old
TGTGCCTT_CTAAGCCT_ATGTAGAC_GTCACGTC	475	544	0.873162	1_day_old
TGTGCCTT_CTAAGCCT_ATGTAGAC_CGGCGACA	1482	1689	0.877442	1_day_old
TGTGCCTT_CTAAGCCT_AAGGAATC_TGCGAAGT	343	397	0.86398	1_day_old
TGTGCCTT_CGTAGACC_GTCCTTCG_CGGCGACA	784	883	0.887882	1_day_old
TGTGCCTT_CGTACCAA_TAACGATT_CCATTGTG	625	715	0.874126	1_day_old
TGTGCCTT_CGTACCAA_GTCCTTCG_CCATTGTG	1262	1425	0.885614	1_day_old
TGTGCCTT_CGTACCAA_AAGGAATC_AATTCTAA	868	967	0.897622	1_day_old
TGTGCCTT_CGGACTGC_TAACGATT_TGCGAAGT	459	539	0.851577	1_day_old
TGTGCCTT_CGGACTGC_TAACGATT_GCGGTTAA	401	464	0.864224	1_day_old
TGTGCCTT_CGGACTGC_GTTATCCG_TGCGAAGT	1788	2031	0.880355	1_day_old
TGTGCCTT_CGGACTGC_GTCCTTCG_TGCGAAGT	110	126	0.873016	1_day_old
TGTGCCTT_CGGACTGC_GTCCTTCG_GCGGTTAA	1005	1159	0.867127	1_day_old
TGTGCCTT_CGCCAGAT_GTCCTTCG_GCGGTTAA	806	942	0.855626	1_day_old
TGTGCCTT_CGCCAGAT_GTCCTTCG_CGGCGACA	601	665	0.903759	1_day_old
TGTGCCTT_CGCCAGAT_AAGGAATC_GCGGTTAA	1357	1558	0.870988	1_day_old
TGTGCCTT_CGATAGGG_TAACGATT_AATTCTAA	586	676	0.866864	1_day_old
TGTGCCTT_CGATAGGG_AAGGAATC_TTACGCCG	272	319	0.852665	1_day_old
TGTGCCTT_CCTTATGT_GTCCTTCG_AATAACGT	149	162	0.919753	1_day_old
TGTGCCTT_CCTGCGGG_GTCCTTCG_CGGCGACA	219	267	0.820225	1_day_old
TGTGCCTT_CCTGCGGG_CGAGCGCT_GTCACGTC	811	959	0.845673	1_day_old
TGTGCCTT_CCTGCGGG_ATGTAGAC_CGGCGACA	990	1128	0.87766	1_day_old
TGTGCCTT_CCTGCGGG_AAGGAATC_AATAACGT	104	121	0.859504	1_day_old
TGTGCCTT_CCCTTGGA_GTCCTTCG_GCGGTTAA	88	106	0.830189	1_day_old
TGTGCCTT_CCCTTGGA_GTCCTTCG_AATTCTAA	127	137	0.927007	1_day_old
TGTGCCTT_CCAGTTTA_ATGTAGAC_GCGGTTAA	387	437	0.885584	1_day_old
TGTGCCTT_CCAGTTTA_ATGTAGAC_CGGCGACA	1410	1594	0.884567	1_day_old
TGTGCCTT_CCACCGTT_GTCCTTCG_TGCGAAGT	204	233	0.875536	1_day_old
TGTGCCTT_CCACCGTT_ATGTAGAC_GTCACGTC	471	543	0.867403	1_day_old
TGTGCCTT_CAGCAACG_TCGACCGA_GTCACGTC	6103	7147	0.853925	1_day_old
TGTGCCTT_CAGCAACG_ATGTAGAC_CGGCGACA	176	215	0.818605	1_day_old
TGTGCCTT_ATTGGGTC_TAACGATT_CCATTGTG	318	354	0.898305	1_day_old
TGTGCCTT_ATTGGGTC_TAACGATT_AATTCTAA	354	400	0.885	1_day_old
TGTGCCTT_ATTGGGTC_GTCCTTCG_TTACGCCG	2941	3398	0.865509	1_day_old
TGTGCCTT_ATTGGGTC_AAGGAATC_TGCGAAGT	363	415	0.874699	1_day_old
TGTGCCTT_ATTACCGT_TCGACCGA_GCGGTTAA	6844	7989	0.856678	1_day_old
TGTGCCTT_ATTACCGT_TAACGATT_TTACGCCG	272	318	0.855346	1_day_old
TGTGCCTT_ATTACCGT_TAACGATT_AATTCTAA	1240	1388	0.893372	1_day_old
TGTGCCTT_ATTACCGT_AAGGAATC_GCGGTTAA	994	1118	0.889088	1_day_old
TGTGCCTT_ATGGTCAT_GTCCTTCG_AATAACGT	112	130	0.861538	1_day_old
TGTGCCTT_ATCGAATG_TCGACCGA_GTCACGTC	8185	9523	0.859498	1_day_old
TGTGCCTT_ATCGAATG_TAACGATT_GCGGTTAA	106	118	0.898305	1_day_old
TGTGCCTT_ATCGAATG_ATGTAGAC_TGCGAAGT	661	733	0.901774	1_day_old
TGTGCCTT_ATCGAATG_AAGGAATC_AATAACGT	141	171	0.824561	1_day_old
TGTGCCTT_ATCCAGGA_TAACGATT_GTCACGTC	654	755	0.866225	1_day_old
TGTGCCTT_ATCCAGGA_TAACGATT_CGGCGACA	783	885	0.884746	1_day_old
TGTGCCTT_ATCCAGGA_GTTATCCG_GTCACGTC	2855	3380	0.844675	1_day_old
TGTGCCTT_ATCCAGGA_GTCCTTCG_AATTCTAA	541	609	0.888342	1_day_old
TGTGCCTT_ATCCAGGA_ATGTAGAC_AATAACGT	2229	2543	0.876524	1_day_old
TGTGCCTT_AGTCCGAG_ATGTAGAC_GCGGTTAA	766	870	0.88046	1_day_old
TGTGCCTT_AGGTTGCC_GTCCTTCG_TGCGAAGT	488	564	0.865248	1_day_old
TGTGCCTT_AGGTTGCC_ATGTAGAC_TTACGCCG	1907	2176	0.876379	1_day_old
TGTGCCTT_AGCCGTTC_GTTATCCG_CGGCGACA	4361	5115	0.85259	1_day_old
TGTGCCTT_AGCCGTTC_ATGTAGAC_AATAACGT	882	1010	0.873267	1_day_old
TGTGCCTT_AGAGATCT_TAACGATT_GCGGTTAA	666	741	0.898785	1_day_old
TGTGCCTT_AGAGATCT_GTCCTTCG_GCGGTTAA	1067	1252	0.852236	1_day_old
TGTGCCTT_AGAGATCT_AAGGAATC_CCATTGTG	937	1075	0.871628	1_day_old
TGTGCCTT_ACTTAGAA_TCGACCGA_CGGCGACA	3337	3919	0.851493	1_day_old
TGTGCCTT_ACTTAGAA_ATGTAGAC_AATTCTAA	956	1105	0.865158	1_day_old
TGTGCCTT_ACTTAGAA_AAGGAATC_TGCGAAGT	103	119	0.865546	1_day_old
TGTGCCTT_ACTTAGAA_AAGGAATC_AATAACGT	2535	2874	0.882046	1_day_old
TGTGCCTT_ACTGCATA_TAACGATT_CGGCGACA	241	277	0.870036	1_day_old
TGTGCCTT_ACTGCATA_TAACGATT_AATAACGT	811	918	0.883442	1_day_old
TGTGCCTT_ACTGCATA_ATGTAGAC_AATAACGT	550	657	0.837139	1_day_old
TGTGCCTT_ACGCGCAG_TAACGATT_AATTCTAA	561	613	0.915171	1_day_old
TGTGCCTT_ACGCGCAG_CGAGCGCT_CCATTGTG	520	594	0.875421	1_day_old
TGTGCCTT_ACGCGCAG_AAGGAATC_AATTCTAA	964	1113	0.866128	1_day_old
TGTGCCTT_ACGATAAC_TAACGATT_TTACGCCG	140	165	0.848485	1_day_old
TGTGCCTT_ACGATAAC_GTTATCCG_GCGGTTAA	4895	5647	0.866832	1_day_old
TGTGCCTT_ACGATAAC_GTCCTTCG_TGCGAAGT	856	960	0.891667	1_day_old
TGTGCCTT_ACGATAAC_GTCCTTCG_CGGCGACA	144	169	0.852071	1_day_old
TGTGCCTT_ACCGGCCC_CGAGCGCT_TGCGAAGT	7472	8908	0.838797	1_day_old
TGTGCCTT_ACCGGCCC_CATTGTGG_GCGGTTAA	901	1073	0.839702	1_day_old
TGTGCCTT_ACCGGCCC_ATGTAGAC_CCATTGTG	160	181	0.883978	1_day_old
TGTGCCTT_ACATTCGT_GTCCTTCG_CGGCGACA	856	979	0.874362	1_day_old
TGTGCCTT_ACATTCGT_ATGTAGAC_CGGCGACA	105	117	0.897436	1_day_old
TGTGCCTT_AATCTACA_TAACGATT_CCATTGTG	137	153	0.895425	1_day_old
TGTGCCTT_AATCTACA_GTCCTTCG_AATTCTAA	694	789	0.879594	1_day_old
TGTGCCTT_AATCTACA_AAGGAATC_TGCGAAGT	304	340	0.894118	1_day_old
TGTGCCTT_AAGGAGTA_TAACGATT_AATTCTAA	260	288	0.902778	1_day_old
TGTGCCTT_AACATGAT_ATGTAGAC_GTCACGTC	168	198	0.848485	1_day_old
TGTGCCTT_AACATGAT_ATGTAGAC_CCATTGTG	594	665	0.893233	1_day_old
TGGTCACA_TTTCTAGC_TAACGATT_CCATTGTG	419	478	0.876569	1_day_old
TGGTCACA_TTTCTAGC_TAACGATT_AATTCTAA	1265	1447	0.874223	1_day_old
TGGTCACA_TTTCTAGC_GTCCTTCG_TTACGCCG	785	926	0.847732	1_day_old
TGGTCACA_TTTCTAGC_GTCCTTCG_AATAACGT	136	158	0.860759	1_day_old
TGGTCACA_TTTCTAGC_ATGTAGAC_CGGCGACA	1243	1420	0.875352	1_day_old
TGGTCACA_TTTCTAGC_AAGGAATC_TTACGCCG	605	687	0.88064	1_day_old
TGGTCACA_TTTCTAGC_AAGGAATC_TGCGAAGT	496	560	0.885714	1_day_old
TGGTCACA_TTGCCTAA_GTCCTTCG_CGGCGACA	1042	1214	0.85832	1_day_old
TGGTCACA_TTGCCTAA_CATTGTGG_TTACGCCG	1481	1695	0.873746	1_day_old
TGGTCACA_TTGCCTAA_CATTGTGG_GTCACGTC	2565	2992	0.857286	1_day_old
TGGTCACA_TTCGTGCA_TAACGATT_GTCACGTC	99	114	0.868421	1_day_old
TGGTCACA_TTAACTTG_TAACGATT_TTACGCCG	848	945	0.897354	1_day_old
TGGTCACA_TTAACTTG_TAACGATT_CGGCGACA	646	740	0.872973	1_day_old
TGGTCACA_TTAACTTG_ATGTAGAC_AATTCTAA	220	247	0.890688	1_day_old
TGGTCACA_TTAACTTG_AAGGAATC_TTACGCCG	836	932	0.896996	1_day_old
TGGTCACA_TGGGCGGT_AAGGAATC_AATTCTAA	499	571	0.873905	1_day_old
TGGTCACA_TGGGCGGT_AAGGAATC_AATAACGT	6314	7260	0.869697	1_day_old
TGGTCACA_TGGAAATC_TAACGATT_TTACGCCG	557	615	0.905691	1_day_old
TGGTCACA_TGGAAATC_ATGTAGAC_CGGCGACA	162	181	0.895028	1_day_old
TGGTCACA_TGGAAATC_AAGGAATC_CGGCGACA	1228	1348	0.910979	1_day_old
TGGTCACA_TGGAAATC_AAGGAATC_CCATTGTG	959	1090	0.879817	1_day_old
TGGTCACA_TGGAAATC_AAGGAATC_AATTCTAA	776	881	0.880817	1_day_old
TGGTCACA_TGCATACT_TAACGATT_AATAACGT	596	675	0.882963	1_day_old
TGGTCACA_TGCATACT_CATTGTGG_CGGCGACA	1141	1330	0.857895	1_day_old
TGGTCACA_TGCATACT_AAGGAATC_TGCGAAGT	1415	1604	0.88217	1_day_old
TGGTCACA_TGCATACT_AAGGAATC_CGGCGACA	998	1113	0.896676	1_day_old
TGGTCACA_TGCATACT_AAGGAATC_AATAACGT	744	818	0.909535	1_day_old
TGGTCACA_TGATTGTT_CATTGTGG_GCGGTTAA	1586	1789	0.886529	1_day_old
TGGTCACA_TGATTGTT_ATGTAGAC_CGGCGACA	244	273	0.893773	1_day_old
TGGTCACA_TGATTGTT_ATGTAGAC_AATAACGT	309	343	0.900875	1_day_old
TGGTCACA_TGATTGTT_AAGGAATC_GTCACGTC	1313	1474	0.890773	1_day_old
TGGTCACA_TGATTGTT_AAGGAATC_CGGCGACA	982	1145	0.857642	1_day_old
TGGTCACA_TGATTGTT_AAGGAATC_AATTCTAA	1425	1619	0.880173	1_day_old
TGGTCACA_TGATGAAA_GTCCTTCG_TTACGCCG	3502	3988	0.878134	1_day_old
TGGTCACA_TGATGAAA_GTCCTTCG_TGCGAAGT	399	450	0.886667	1_day_old
TGGTCACA_TGATGAAA_ATGTAGAC_TTACGCCG	482	560	0.860714	1_day_old
TGGTCACA_TCTGGCGA_TAACGATT_GTCACGTC	1524	1750	0.870857	1_day_old
TGGTCACA_TCTGGCGA_GTCCTTCG_CGGCGACA	140	159	0.880503	1_day_old
TGGTCACA_TCTGGCGA_GTCCTTCG_AATAACGT	882	993	0.888218	1_day_old
TGGTCACA_TCTGGCGA_ATGTAGAC_AATAACGT	1190	1339	0.888723	1_day_old
TGGTCACA_TCTGGCGA_AAGGAATC_TTACGCCG	235	263	0.893536	1_day_old
TGGTCACA_TCTGGCGA_AAGGAATC_AATAACGT	2613	2999	0.87129	1_day_old
TGGTCACA_TCCGAGTT_TAACGATT_CCATTGTG	240	265	0.90566	1_day_old
TGGTCACA_TCCGAGTT_AAGGAATC_TTACGCCG	807	917	0.880044	1_day_old
TGGTCACA_TCCGAGTT_AAGGAATC_GCGGTTAA	548	638	0.858934	1_day_old
TGGTCACA_TCCATCAA_TCGACCGA_CGGCGACA	2731	3288	0.830596	1_day_old
TGGTCACA_TCCATCAA_TAACGATT_CGGCGACA	96	104	0.923077	1_day_old
TGGTCACA_TCCATCAA_GTCCTTCG_TGCGAAGT	201	242	0.830579	1_day_old
TGGTCACA_TCCATCAA_GTCCTTCG_CGGCGACA	108	118	0.915254	1_day_old
TGGTCACA_TCCATCAA_GTCCTTCG_AATTCTAA	1115	1296	0.86034	1_day_old
TGGTCACA_TCCATCAA_ATGTAGAC_CGGCGACA	1163	1340	0.86791	1_day_old
TGGTCACA_TCCATCAA_AAGGAATC_TTACGCCG	1131	1257	0.899761	1_day_old
TGGTCACA_TCCATCAA_AAGGAATC_CGGCGACA	97	122	0.795082	1_day_old
TGGTCACA_TCACATGG_GTCCTTCG_AATAACGT	120	135	0.888889	1_day_old
TGGTCACA_TCACATGG_AAGGAATC_AATTCTAA	1208	1382	0.874096	1_day_old
TGGTCACA_TCAAGAGC_AAGGAATC_AATAACGT	280	319	0.877743	1_day_old
TGGTCACA_TATTTGCG_GTCCTTCG_TGCGAAGT	856	972	0.880658	1_day_old
TGGTCACA_TAGATCGC_TAACGATT_GTCACGTC	702	815	0.86135	1_day_old
TGGTCACA_TACTGACC_TAACGATT_GCGGTTAA	104	119	0.87395	1_day_old
TGGTCACA_TACTGACC_CGAGCGCT_TGCGAAGT	296	362	0.81768	1_day_old
TGGTCACA_TACTGACC_ATGTAGAC_AATAACGT	1145	1311	0.873379	1_day_old
TGGTCACA_TACTGACC_AAGGAATC_CGGCGACA	185	208	0.889423	1_day_old
TGGTCACA_TAAGTTAC_TAACGATT_GCGGTTAA	86	103	0.834951	1_day_old
TGGTCACA_TAAGTTAC_TAACGATT_AATTCTAA	2669	3119	0.855723	1_day_old
TGGTCACA_TAAGTTAC_ATGTAGAC_GTCACGTC	1602	1845	0.868293	1_day_old
TGGTCACA_TAAGTTAC_AAGGAATC_CCATTGTG	405	462	0.876623	1_day_old
TGGTCACA_TAAGTTAC_AAGGAATC_AATTCTAA	890	1031	0.86324	1_day_old
TGGTCACA_TAACCAAG_GTTATCCG_CGGCGACA	2834	3263	0.868526	1_day_old
TGGTCACA_TAACCAAG_AAGGAATC_CCATTGTG	3767	4264	0.883443	1_day_old
TGGTCACA_GTGTATCG_GTCCTTCG_GCGGTTAA	861	966	0.891304	1_day_old
TGGTCACA_GTGTATCG_ATGTAGAC_TTACGCCG	2413	2807	0.859637	1_day_old
TGGTCACA_GTGTATCG_AAGGAATC_GCGGTTAA	148	166	0.891566	1_day_old
TGGTCACA_GTCGGACT_TAACGATT_GTCACGTC	204	241	0.846473	1_day_old
TGGTCACA_GTCGGACT_CATTGTGG_TGCGAAGT	1278	1447	0.883207	1_day_old
TGGTCACA_GTAAGGAG_TAACGATT_GCGGTTAA	2401	2696	0.890579	1_day_old
TGGTCACA_GTAAGGAG_ATGTAGAC_CGGCGACA	1168	1323	0.882842	1_day_old
TGGTCACA_GGTTCAAT_TAACGATT_GCGGTTAA	618	700	0.882857	1_day_old
TGGTCACA_GGTTCAAT_ATGTAGAC_AATTCTAA	1071	1275	0.84	1_day_old
TGGTCACA_GGTGAAGG_TCGACCGA_AATAACGT	911	1085	0.839631	1_day_old
TGGTCACA_GGTGAAGG_TAACGATT_AATAACGT	320	364	0.879121	1_day_old
TGGTCACA_GGTGAAGG_GTCCTTCG_CCATTGTG	244	288	0.847222	1_day_old
TGGTCACA_GGTGAAGG_CGAGCGCT_CCATTGTG	786	933	0.842444	1_day_old
TGGTCACA_GGTGAAGG_CATTGTGG_GTCACGTC	106	116	0.913793	1_day_old
TGGTCACA_GGTGAAGG_ATGTAGAC_GCGGTTAA	455	524	0.868321	1_day_old
TGGTCACA_GGTGAAGG_AAGGAATC_TTACGCCG	2328	2662	0.87453	1_day_old
TGGTCACA_GGTGAAGG_AAGGAATC_GCGGTTAA	283	320	0.884375	1_day_old
TGGTCACA_GGGCTTGG_TAACGATT_CCATTGTG	110	126	0.873016	1_day_old
TGGTCACA_GGGCTTGG_AAGGAATC_TTACGCCG	113	130	0.869231	1_day_old
TGGTCACA_GGCACGGA_TAACGATT_TGCGAAGT	659	753	0.875166	1_day_old
TGGTCACA_GGCACGGA_TAACGATT_GCGGTTAA	712	832	0.855769	1_day_old
TGGTCACA_GGCACGGA_GTCCTTCG_CCATTGTG	732	855	0.85614	1_day_old
TGGTCACA_GGCACGGA_ATGTAGAC_CGGCGACA	253	280	0.903571	1_day_old
TGGTCACA_GCCCACGT_AAGGAATC_GCGGTTAA	1078	1240	0.869355	1_day_old
TGGTCACA_GCCCACGT_AAGGAATC_AATAACGT	618	691	0.894356	1_day_old
TGGTCACA_GCATTAAG_TAACGATT_TGCGAAGT	149	169	0.881657	1_day_old
TGGTCACA_GCATTAAG_TAACGATT_GTCACGTC	474	519	0.913295	1_day_old
TGGTCACA_GCAGCCTC_GTCCTTCG_CGGCGACA	157	187	0.839572	1_day_old
TGGTCACA_GCAGCCTC_AAGGAATC_AATAACGT	1054	1247	0.845229	1_day_old
TGGTCACA_GCAAATTT_GTCCTTCG_CGGCGACA	134	151	0.887417	1_day_old
TGGTCACA_GCAAATTT_ATGTAGAC_TTACGCCG	168	188	0.893617	1_day_old
TGGTCACA_GCAAATTT_ATGTAGAC_TTACGCCG	145	162	0.895062	1_day_old
TGGTCACA_GCAAATTT_AAGGAATC_AATTCTAA	677	787	0.860229	1_day_old
TGGTCACA_GCAAATTT_AAGGAATC_AATAACGT	801	909	0.881188	1_day_old
TGGTCACA_GATTCCCA_GTCCTTCG_CCATTGTG	298	352	0.846591	1_day_old
TGGTCACA_GATTCCCA_GTCCTTCG_AATTCTAA	3221	3788	0.850317	1_day_old
TGGTCACA_GATTCCCA_AAGGAATC_AATTCTAA	555	640	0.867188	1_day_old
TGGTCACA_GATCATTC_TAACGATT_GCGGTTAA	430	495	0.868687	1_day_old
TGGTCACA_GATCATTC_TAACGATT_AATTCTAA	489	572	0.854895	1_day_old
TGGTCACA_GATCATTC_AAGGAATC_GCGGTTAA	1500	1777	0.844119	1_day_old
TGGTCACA_GATCATTC_AAGGAATC_CCATTGTG	449	507	0.885602	1_day_old
TGGTCACA_GAGACGTG_ATGTAGAC_AATAACGT	420	472	0.889831	1_day_old
TGGTCACA_GAGACGTG_AAGGAATC_CGGCGACA	483	534	0.904494	1_day_old
TGGTCACA_GACGTGGC_TAACGATT_CGGCGACA	1237	1407	0.879176	1_day_old
TGGTCACA_GACGTGGC_ATGTAGAC_CCATTGTG	528	633	0.834123	1_day_old
TGGTCACA_GAACTCGA_TAACGATT_CCATTGTG	370	414	0.89372	1_day_old
TGGTCACA_GAACTCGA_TAACGATT_AATTCTAA	170	195	0.871795	1_day_old
TGGTCACA_CTTTAACA_TAACGATT_TGCGAAGT	152	165	0.921212	1_day_old
TGGTCACA_CTTTAACA_CGAGCGCT_TTACGCCG	2061	2346	0.878517	1_day_old
TGGTCACA_CTTTAACA_ATGTAGAC_GTCACGTC	1064	1227	0.867156	1_day_old
TGGTCACA_CTTTAACA_ATGTAGAC_AATAACGT	473	550	0.86	1_day_old
TGGTCACA_CTCTCTAT_GTCCTTCG_CCATTGTG	6434	7347	0.875732	1_day_old
TGGTCACA_CTCTCTAT_GTCCTTCG_AATAACGT	369	428	0.86215	1_day_old
TGGTCACA_CTCTCTAT_ATGTAGAC_TGCGAAGT	545	624	0.873397	1_day_old
TGGTCACA_CTCTCTAT_ATGTAGAC_CGGCGACA	122	145	0.841379	1_day_old
TGGTCACA_CTCTCTAT_AAGGAATC_TTACGCCG	402	440	0.913636	1_day_old
TGGTCACA_CTCTCTAT_AAGGAATC_CCATTGTG	772	885	0.872316	1_day_old
TGGTCACA_CTAGAAGT_GTCCTTCG_AATAACGT	1897	2126	0.892286	1_day_old
TGGTCACA_CTAGAAGT_AAGGAATC_TTACGCCG	86	106	0.811321	1_day_old
TGGTCACA_CTAGAAGT_AAGGAATC_AATAACGT	1399	1595	0.877116	1_day_old
TGGTCACA_CGTAGACC_CATTGTGG_GCGGTTAA	228	266	0.857143	1_day_old
TGGTCACA_CGTAGACC_AAGGAATC_CGGCGACA	640	741	0.863698	1_day_old
TGGTCACA_CGTACCAA_GTCCTTCG_GCGGTTAA	1094	1282	0.853354	1_day_old
TGGTCACA_CGTACCAA_GTCCTTCG_AATAACGT	1175	1347	0.872309	1_day_old
TGGTCACA_CGTACCAA_AAGGAATC_CCATTGTG	177	204	0.867647	1_day_old
TGGTCACA_CGGACTGC_TAACGATT_GTCACGTC	510	569	0.896309	1_day_old
TGGTCACA_CGGACTGC_CATTGTGG_AATTCTAA	8054	9280	0.867888	1_day_old
TGGTCACA_CGGACTGC_ATGTAGAC_AATTCTAA	235	257	0.914397	1_day_old
TGGTCACA_CGGACTGC_AAGGAATC_CGGCGACA	1808	2048	0.882812	1_day_old
TGGTCACA_CGCCAGAT_TCGACCGA_CCATTGTG	1822	2109	0.863917	1_day_old
TGGTCACA_CGCCAGAT_GTTATCCG_CGGCGACA	1649	1929	0.854847	1_day_old
TGGTCACA_CGCCAGAT_GTCCTTCG_GTCACGTC	1646	1960	0.839796	1_day_old
TGGTCACA_CGCCAGAT_ATGTAGAC_TGCGAAGT	233	255	0.913725	1_day_old
TGGTCACA_CGATAGGG_GTCCTTCG_TGCGAAGT	387	453	0.854305	1_day_old
TGGTCACA_CGATAGGG_GTCCTTCG_GCGGTTAA	937	1079	0.868397	1_day_old
TGGTCACA_CCTTATGT_ATGTAGAC_TGCGAAGT	1731	1979	0.874684	1_day_old
TGGTCACA_CCTTATGT_AAGGAATC_GTCACGTC	202	235	0.859574	1_day_old
TGGTCACA_CCTGCGGG_GTCCTTCG_GCGGTTAA	314	374	0.839572	1_day_old
TGGTCACA_CCTGCGGG_ATGTAGAC_GTCACGTC	91	104	0.875	1_day_old
TGGTCACA_CCTGCGGG_AAGGAATC_TTACGCCG	683	783	0.872286	1_day_old
TGGTCACA_CCTGCGGG_AAGGAATC_AATAACGT	536	613	0.874388	1_day_old
TGGTCACA_CCCTTGGA_TAACGATT_GTCACGTC	96	107	0.897196	1_day_old
TGGTCACA_CCCTTGGA_TAACGATT_CCATTGTG	200	228	0.877193	1_day_old
TGGTCACA_CCCTTGGA_TAACGATT_AATTCTAA	127	143	0.888112	1_day_old
TGGTCACA_CCCTTGGA_GTTATCCG_TGCGAAGT	98	117	0.837607	1_day_old
TGGTCACA_CCCTTGGA_GTCCTTCG_AATAACGT	164	185	0.886486	1_day_old
TGGTCACA_CCCTTGGA_CGAGCGCT_AATAACGT	1238	1420	0.871831	1_day_old
TGGTCACA_CCCTTGGA_ATGTAGAC_GTCACGTC	780	871	0.895522	1_day_old
TGGTCACA_CCCTTGGA_ATGTAGAC_CCATTGTG	91	103	0.883495	1_day_old
TGGTCACA_CCCTTGGA_ATGTAGAC_AATTCTAA	991	1115	0.888789	1_day_old
TGGTCACA_CCACCGTT_GTCCTTCG_AATAACGT	137	159	0.861635	1_day_old
TGGTCACA_CCACCGTT_AAGGAATC_AATTCTAA	981	1101	0.891008	1_day_old
TGGTCACA_CAGCAACG_TAACGATT_CGGCGACA	372	411	0.905109	1_day_old
TGGTCACA_CAGCAACG_TAACGATT_AATAACGT	150	165	0.909091	1_day_old
TGGTCACA_CAGCAACG_GTCCTTCG_AATTCTAA	222	257	0.863813	1_day_old
TGGTCACA_CAGCAACG_ATGTAGAC_AATTCTAA	827	969	0.853457	1_day_old
TGGTCACA_CAGCAACG_AAGGAATC_TGCGAAGT	585	655	0.89313	1_day_old
TGGTCACA_ATTGGGTC_AAGGAATC_CCATTGTG	279	314	0.888535	1_day_old
TGGTCACA_ATTACCGT_TAACGATT_AATAACGT	95	119	0.798319	1_day_old
TGGTCACA_ATTACCGT_GTCCTTCG_TTACGCCG	184	211	0.872038	1_day_old
TGGTCACA_ATTACCGT_ATGTAGAC_AATAACGT	2418	2790	0.866667	1_day_old
TGGTCACA_ATGGTCAT_TAACGATT_AATTCTAA	431	468	0.92094	1_day_old
TGGTCACA_ATGGTCAT_GTCCTTCG_GTCACGTC	609	708	0.860169	1_day_old
TGGTCACA_ATGGTCAT_AAGGAATC_TTACGCCG	879	992	0.886089	1_day_old
TGGTCACA_ATGGTCAT_AAGGAATC_GCGGTTAA	1027	1215	0.845267	1_day_old
TGGTCACA_ATCCAGGA_AAGGAATC_GTCACGTC	361	435	0.829885	1_day_old
TGGTCACA_AGTCCGAG_GTTATCCG_GTCACGTC	408	476	0.857143	1_day_old
TGGTCACA_AGTCCGAG_GTCCTTCG_TGCGAAGT	160	181	0.883978	1_day_old
TGGTCACA_AGTCCGAG_GTCCTTCG_GCGGTTAA	188	207	0.908213	1_day_old
TGGTCACA_AGTCCGAG_GTCCTTCG_CCATTGTG	133	151	0.880795	1_day_old
TGGTCACA_AGTCCGAG_GTCCTTCG_CCATTGTG	619	690	0.897101	1_day_old
TGGTCACA_AGTCCGAG_CGAGCGCT_CGGCGACA	595	687	0.866084	1_day_old
TGGTCACA_AGTCCGAG_CGAGCGCT_AATAACGT	1707	1999	0.853927	1_day_old
TGGTCACA_AGTCCGAG_ATGTAGAC_TTACGCCG	297	360	0.825	1_day_old
TGGTCACA_AGCCGTTC_AAGGAATC_AATTCTAA	1083	1223	0.885527	1_day_old
TGGTCACA_AGAGTAGA_ATGTAGAC_AATAACGT	1068	1258	0.848967	1_day_old
TGGTCACA_AGAGTAGA_AAGGAATC_CCATTGTG	676	756	0.89418	1_day_old
TGGTCACA_AGAGATCT_GTCCTTCG_GCGGTTAA	493	539	0.914657	1_day_old
TGGTCACA_AGAGATCT_GTCCTTCG_CCATTGTG	307	358	0.857542	1_day_old
TGGTCACA_AGAGATCT_AAGGAATC_CGGCGACA	393	447	0.879195	1_day_old
TGGTCACA_ACTTGTTG_TCGACCGA_TTACGCCG	1453	1726	0.841831	1_day_old
TGGTCACA_ACTTGTTG_TAACGATT_GCGGTTAA	407	483	0.84265	1_day_old
TGGTCACA_ACTTGTTG_GTCCTTCG_CGGCGACA	314	351	0.894587	1_day_old
TGGTCACA_ACTTGTTG_ATGTAGAC_TTACGCCG	154	180	0.855556	1_day_old
TGGTCACA_ACTTGTTG_ATGTAGAC_GCGGTTAA	98	117	0.837607	1_day_old
TGGTCACA_ACTTGTTG_ATGTAGAC_AATTCTAA	622	697	0.892396	1_day_old
TGGTCACA_ACTTGTTG_AAGGAATC_CCATTGTG	1198	1381	0.867487	1_day_old
TGGTCACA_ACTTAGAA_GTCCTTCG_CGGCGACA	1084	1219	0.889253	1_day_old
TGGTCACA_ACTTAGAA_GTCCTTCG_AATAACGT	719	808	0.889851	1_day_old
TGGTCACA_ACTGCATA_TAACGATT_AATTCTAA	344	394	0.873096	1_day_old
TGGTCACA_ACTGCATA_TAACGATT_AATAACGT	126	142	0.887324	1_day_old
TGGTCACA_ACTGCATA_GTTATCCG_CCATTGTG	3178	3614	0.879358	1_day_old
TGGTCACA_ACGCGCAG_ATGTAGAC_AATTCTAA	134	157	0.853503	1_day_old
TGGTCACA_ACGCGCAG_AAGGAATC_CCATTGTG	480	524	0.916031	1_day_old
TGGTCACA_ACGATAAC_TAACGATT_TTACGCCG	209	232	0.900862	1_day_old
TGGTCACA_ACGATAAC_GTCCTTCG_TTACGCCG	3038	3426	0.886748	1_day_old
TGGTCACA_ACGATAAC_ATGTAGAC_AATAACGT	1308	1576	0.829949	1_day_old
TGGTCACA_ACGATAAC_AAGGAATC_GTCACGTC	155	172	0.901163	1_day_old
TGGTCACA_ACGATAAC_AAGGAATC_AATTCTAA	969	1086	0.892265	1_day_old
TGGTCACA_ACATTCGT_GTCCTTCG_TTACGCCG	274	309	0.886731	1_day_old
TGGTCACA_ACATTCGT_AAGGAATC_TTACGCCG	765	876	0.873288	1_day_old
TGGTCACA_ACATTCGT_AAGGAATC_CGGCGACA	577	655	0.880916	1_day_old
TGGTCACA_ACATTCGT_AAGGAATC_AATTCTAA	1185	1407	0.842217	1_day_old
TGGTCACA_AATCTACA_TAACGATT_TGCGAAGT	579	691	0.837916	1_day_old
TGGTCACA_AATCTACA_TAACGATT_GCGGTTAA	1296	1475	0.878644	1_day_old
TGGTCACA_AATCTACA_GTCCTTCG_TTACGCCG	194	218	0.889908	1_day_old
TGGTCACA_AATCTACA_AAGGAATC_CGGCGACA	817	937	0.871932	1_day_old
TGGTCACA_AAGGAGTA_GTCCTTCG_TGCGAAGT	491	572	0.858392	1_day_old
TGGTCACA_AAGGAGTA_CATTGTGG_TTACGCCG	175	203	0.862069	1_day_old
TGGTCACA_AACATGAT_TAACGATT_TGCGAAGT	202	235	0.859574	1_day_old
TGGTCACA_AACATGAT_ATGTAGAC_GTCACGTC	465	531	0.875706	1_day_old
TGGTCACA_AACATGAT_AAGGAATC_AATAACGT	714	839	0.851013	1_day_old
TGGGTTTC_TTTCTAGC_TAACGATT_GCGGTTAA	135	162	0.833333	1_day_old
TGGGTTTC_TTTCTAGC_TAACGATT_AATAACGT	763	846	0.901891	1_day_old
TGGGTTTC_TTTCTAGC_GTCCTTCG_TGCGAAGT	330	383	0.861619	1_day_old
TGGGTTTC_TTTCTAGC_GTCCTTCG_AATTCTAA	1058	1178	0.898132	1_day_old
TGGGTTTC_TTGCCTAA_GTTATCCG_GCGGTTAA	3503	4077	0.85921	1_day_old
TGGGTTTC_TTGCCTAA_GTCCTTCG_CGGCGACA	829	963	0.860852	1_day_old
TGGGTTTC_TTGCCTAA_ATGTAGAC_GTCACGTC	5652	6438	0.877912	1_day_old
TGGGTTTC_TTCGTGCA_TAACGATT_GTCACGTC	100	121	0.826446	1_day_old
TGGGTTTC_TTCGTGCA_GTCCTTCG_TGCGAAGT	507	570	0.889474	1_day_old
TGGGTTTC_TTCGTGCA_GTCCTTCG_GCGGTTAA	885	989	0.894843	1_day_old
TGGGTTTC_TTCGTGCA_CATTGTGG_GTCACGTC	5637	6531	0.863114	1_day_old
TGGGTTTC_TTCGTGCA_AAGGAATC_AATTCTAA	155	174	0.890805	1_day_old
TGGGTTTC_TTAACTTG_ATGTAGAC_CCATTGTG	893	1044	0.855364	1_day_old
TGGGTTTC_TTAACTTG_AAGGAATC_TTACGCCG	758	855	0.88655	1_day_old
TGGGTTTC_TGTTCCTG_GTCCTTCG_TGCGAAGT	93	112	0.830357	1_day_old
TGGGTTTC_TGTTCCTG_GTCCTTCG_CGGCGACA	793	954	0.831237	1_day_old
TGGGTTTC_TGTTCCTG_GTCCTTCG_CCATTGTG	153	177	0.864407	1_day_old
TGGGTTTC_TGTTCCTG_ATGTAGAC_AATAACGT	221	269	0.821561	1_day_old
TGGGTTTC_TGTTCCTG_AAGGAATC_TTACGCCG	1485	1718	0.864377	1_day_old
TGGGTTTC_TGGGCGGT_TAACGATT_TTACGCCG	746	853	0.87456	1_day_old
TGGGTTTC_TGGAAATC_ATGTAGAC_TGCGAAGT	104	112	0.928571	1_day_old
TGGGTTTC_TGGAAATC_ATGTAGAC_GCGGTTAA	1945	2206	0.881686	1_day_old
TGGGTTTC_TGCATACT_AAGGAATC_GCGGTTAA	399	467	0.85439	1_day_old
TGGGTTTC_TGATTGTT_TAACGATT_TTACGCCG	180	215	0.837209	1_day_old
TGGGTTTC_TGATTGTT_TAACGATT_AATTCTAA	1849	2068	0.894101	1_day_old
TGGGTTTC_TGATTGTT_GTCCTTCG_TTACGCCG	238	268	0.88806	1_day_old
TGGGTTTC_TGATTGTT_ATGTAGAC_TTACGCCG	1638	1798	0.911012	1_day_old
TGGGTTTC_TGATTGTT_AAGGAATC_GTCACGTC	1757	2048	0.85791	1_day_old
TGGGTTTC_TGATTGTT_AAGGAATC_GCGGTTAA	244	278	0.877698	1_day_old
TGGGTTTC_TGATGAAA_GTCCTTCG_TGCGAAGT	608	711	0.855134	1_day_old
TGGGTTTC_TGATGAAA_AAGGAATC_AATAACGT	2154	2426	0.887881	1_day_old
TGGGTTTC_TCTGGCGA_GTTATCCG_GCGGTTAA	2215	2582	0.857862	1_day_old
TGGGTTTC_TCTGGCGA_AAGGAATC_AATAACGT	429	505	0.849505	1_day_old
TGGGTTTC_TCCGAGTT_GTCCTTCG_CGGCGACA	856	1002	0.854291	1_day_old
TGGGTTTC_TCCGAGTT_ATGTAGAC_AATAACGT	214	239	0.895397	1_day_old
TGGGTTTC_TCCGAGTT_AAGGAATC_TTACGCCG	1294	1439	0.899236	1_day_old
TGGGTTTC_TCCGAGTT_AAGGAATC_TTACGCCG	904	1002	0.902196	1_day_old
TGGGTTTC_TCACATGG_GTCCTTCG_CGGCGACA	958	1098	0.872495	1_day_old
TGGGTTTC_TCACATGG_ATGTAGAC_CCATTGTG	123	132	0.931818	1_day_old
TGGGTTTC_TCACATGG_AAGGAATC_TGCGAAGT	700	782	0.895141	1_day_old
TGGGTTTC_TCACATGG_AAGGAATC_GTCACGTC	176	206	0.854369	1_day_old
TGGGTTTC_TCAAGAGC_TAACGATT_GTCACGTC	112	123	0.910569	1_day_old
TGGGTTTC_TCAAGAGC_TAACGATT_AATTCTAA	720	815	0.883436	1_day_old
TGGGTTTC_TCAAGAGC_ATGTAGAC_AATAACGT	97	114	0.850877	1_day_old
TGGGTTTC_TCAAGAGC_AAGGAATC_AATAACGT	2228	2523	0.883076	1_day_old
TGGGTTTC_TATTTGCG_ATGTAGAC_TTACGCCG	1054	1234	0.854133	1_day_old
TGGGTTTC_TATCCTCT_TAACGATT_CGGCGACA	483	534	0.904494	1_day_old
TGGGTTTC_TATCCTCT_TAACGATT_AATAACGT	397	441	0.900227	1_day_old
TGGGTTTC_TATCCTCT_CGAGCGCT_AATAACGT	1091	1227	0.889161	1_day_old
TGGGTTTC_TATCCTCT_AAGGAATC_CCATTGTG	1021	1174	0.869676	1_day_old
TGGGTTTC_TATCCTCT_AAGGAATC_AATTCTAA	2227	2544	0.875393	1_day_old
TGGGTTTC_TAGATCGC_AAGGAATC_GTCACGTC	494	539	0.916512	1_day_old
TGGGTTTC_TAGATCGC_AAGGAATC_CCATTGTG	557	647	0.860896	1_day_old
TGGGTTTC_TACTGACC_ATGTAGAC_GTCACGTC	220	268	0.820896	1_day_old
TGGGTTTC_TACTGACC_AAGGAATC_GTCACGTC	3262	3681	0.886172	1_day_old
TGGGTTTC_TAAGTTAC_GTCCTTCG_AATAACGT	1020	1177	0.86661	1_day_old
TGGGTTTC_TAAGTTAC_CATTGTGG_GCGGTTAA	3600	4103	0.877407	1_day_old
TGGGTTTC_TAAGTTAC_ATGTAGAC_TTACGCCG	974	1107	0.879855	1_day_old
TGGGTTTC_TAAGTTAC_AAGGAATC_TGCGAAGT	359	417	0.860911	1_day_old
TGGGTTTC_TAACCAAG_TAACGATT_CGGCGACA	653	733	0.890859	1_day_old
TGGGTTTC_TAACCAAG_TAACGATT_AATAACGT	91	103	0.883495	1_day_old
TGGGTTTC_TAACCAAG_GTCCTTCG_GTCACGTC	1819	2085	0.872422	1_day_old
TGGGTTTC_TAACCAAG_GTCCTTCG_GCGGTTAA	221	249	0.88755	1_day_old
TGGGTTTC_TAACCAAG_ATGTAGAC_GTCACGTC	273	320	0.853125	1_day_old
TGGGTTTC_TAACCAAG_ATGTAGAC_GCGGTTAA	868	976	0.889344	1_day_old
TGGGTTTC_TAACCAAG_ATGTAGAC_CGGCGACA	1263	1431	0.8826	1_day_old
TGGGTTTC_TAACCAAG_AAGGAATC_TTACGCCG	462	555	0.832432	1_day_old
TGGGTTTC_TAACCAAG_AAGGAATC_TTACGCCG	1224	1373	0.891479	1_day_old
TGGGTTTC_GTGTATCG_GTTATCCG_CGGCGACA	106	127	0.834646	1_day_old
TGGGTTTC_GTGTATCG_ATGTAGAC_AATAACGT	128	156	0.820513	1_day_old
TGGGTTTC_GTGTATCG_AAGGAATC_TGCGAAGT	914	1026	0.890838	1_day_old
TGGGTTTC_GTCGGACT_TCGACCGA_AATAACGT	4272	5178	0.825029	1_day_old
TGGGTTTC_GTCGGACT_AAGGAATC_AATAACGT	2705	3074	0.879961	1_day_old
TGGGTTTC_GTAAGGAG_CATTGTGG_CCATTGTG	2506	2845	0.880844	1_day_old
TGGGTTTC_GTAAGGAG_AAGGAATC_AATAACGT	2471	2817	0.877174	1_day_old
TGGGTTTC_GGTTCAAT_TAACGATT_CGGCGACA	1129	1303	0.866462	1_day_old
TGGGTTTC_GGTTCAAT_TAACGATT_AATTCTAA	924	1040	0.888462	1_day_old
TGGGTTTC_GGTTCAAT_GTCCTTCG_TGCGAAGT	479	570	0.840351	1_day_old
TGGGTTTC_GGTTCAAT_CATTGTGG_TTACGCCG	2493	2869	0.868944	1_day_old
TGGGTTTC_GGTTCAAT_AAGGAATC_TGCGAAGT	541	602	0.898671	1_day_old
TGGGTTTC_GGTGAAGG_ATGTAGAC_AATTCTAA	231	260	0.888462	1_day_old
TGGGTTTC_GGTGAAGG_AAGGAATC_TTACGCCG	93	107	0.869159	1_day_old
TGGGTTTC_GGCACGGA_AAGGAATC_TTACGCCG	809	929	0.870829	1_day_old
TGGGTTTC_GCCCACGT_AAGGAATC_AATTCTAA	1108	1266	0.875197	1_day_old
TGGGTTTC_GCCCACGT_AAGGAATC_AATAACGT	120	132	0.909091	1_day_old
TGGGTTTC_GCATTAAG_TAACGATT_CGGCGACA	550	608	0.904605	1_day_old
TGGGTTTC_GCATTAAG_GTCCTTCG_TGCGAAGT	368	423	0.869976	1_day_old
TGGGTTTC_GCATTAAG_CATTGTGG_AATTCTAA	3198	3675	0.870204	1_day_old
TGGGTTTC_GCATTAAG_ATGTAGAC_CGGCGACA	96	102	0.941176	1_day_old
TGGGTTTC_GCAGCCTC_GTCCTTCG_AATAACGT	1679	2010	0.835323	1_day_old
TGGGTTTC_GCAGCCTC_ATGTAGAC_CGGCGACA	181	198	0.914141	1_day_old
TGGGTTTC_GCAGCCTC_AAGGAATC_AATTCTAA	708	800	0.885	1_day_old
TGGGTTTC_GCAAATTT_GTCCTTCG_CCATTGTG	343	390	0.879487	1_day_old
TGGGTTTC_GCAAATTT_ATGTAGAC_CCATTGTG	1782	2064	0.863372	1_day_old
TGGGTTTC_GCAAATTT_ATGTAGAC_AATAACGT	116	130	0.892308	1_day_old
TGGGTTTC_GCAAATTT_AAGGAATC_CCATTGTG	5020	5886	0.852871	1_day_old
TGGGTTTC_GATTCCCA_AAGGAATC_AATTCTAA	2615	3124	0.837068	1_day_old
TGGGTTTC_GATCATTC_GTCCTTCG_AATAACGT	1444	1621	0.890808	1_day_old
TGGGTTTC_GAGACGTG_TAACGATT_TGCGAAGT	312	353	0.883853	1_day_old
TGGGTTTC_GAGACGTG_GTCCTTCG_CGGCGACA	111	126	0.880952	1_day_old
TGGGTTTC_GAGACGTG_CATTGTGG_AATAACGT	437	501	0.872255	1_day_old
TGGGTTTC_GAGACGTG_AAGGAATC_CCATTGTG	3643	4204	0.866556	1_day_old
TGGGTTTC_GACGTGGC_TAACGATT_GCGGTTAA	761	872	0.872706	1_day_old
TGGGTTTC_GACGTGGC_TAACGATT_CGGCGACA	668	755	0.884768	1_day_old
TGGGTTTC_GACGTGGC_GTTATCCG_GTCACGTC	2409	2737	0.880161	1_day_old
TGGGTTTC_GACGTGGC_GTCCTTCG_CCATTGTG	162	179	0.905028	1_day_old
TGGGTTTC_GACGTGGC_CGAGCGCT_GCGGTTAA	5048	5809	0.868996	1_day_old
TGGGTTTC_GACGTGGC_ATGTAGAC_GTCACGTC	790	880	0.897727	1_day_old
TGGGTTTC_GACGTGGC_ATGTAGAC_AATAACGT	165	197	0.837563	1_day_old
TGGGTTTC_GACGTGGC_AAGGAATC_CCATTGTG	927	1045	0.887081	1_day_old
TGGGTTTC_GAACTCGA_TAACGATT_CGGCGACA	666	766	0.869452	1_day_old
TGGGTTTC_CTTTAACA_CGAGCGCT_AATAACGT	1271	1440	0.882639	1_day_old
TGGGTTTC_CTAGAAGT_GTTATCCG_CGGCGACA	2940	3479	0.84507	1_day_old
TGGGTTTC_CTAGAAGT_GTCCTTCG_GCGGTTAA	1107	1292	0.856811	1_day_old
TGGGTTTC_CTAAGCCT_GTTATCCG_GCGGTTAA	4302	4985	0.862989	1_day_old
TGGGTTTC_CTAAGCCT_GTCCTTCG_TGCGAAGT	113	137	0.824818	1_day_old
TGGGTTTC_CTAAGCCT_ATGTAGAC_AATTCTAA	374	430	0.869767	1_day_old
TGGGTTTC_CGTAGACC_GTCCTTCG_CGGCGACA	112	139	0.805755	1_day_old
TGGGTTTC_CGTACCAA_AAGGAATC_GCGGTTAA	137	153	0.895425	1_day_old
TGGGTTTC_CGTACCAA_AAGGAATC_AATTCTAA	439	494	0.888664	1_day_old
TGGGTTTC_CGGACTGC_GTCCTTCG_GCGGTTAA	222	260	0.853846	1_day_old
TGGGTTTC_CGGACTGC_GTCCTTCG_AATTCTAA	1127	1296	0.869599	1_day_old
TGGGTTTC_CGCCAGAT_TAACGATT_CCATTGTG	376	429	0.876457	1_day_old
TGGGTTTC_CGCCAGAT_CATTGTGG_AATAACGT	3243	3735	0.868273	1_day_old
TGGGTTTC_CGCCAGAT_ATGTAGAC_GTCACGTC	1714	1917	0.894105	1_day_old
TGGGTTTC_CGATAGGG_CGAGCGCT_GCGGTTAA	251	301	0.833887	1_day_old
TGGGTTTC_CGATAGGG_ATGTAGAC_GCGGTTAA	100	119	0.840336	1_day_old
TGGGTTTC_CCTTATGT_AAGGAATC_TTACGCCG	1180	1409	0.837473	1_day_old
TGGGTTTC_CCTTATGT_AAGGAATC_TTACGCCG	197	226	0.871681	1_day_old
TGGGTTTC_CCTGCGGG_ATGTAGAC_GCGGTTAA	1015	1161	0.874246	1_day_old
TGGGTTTC_CCTGCGGG_AAGGAATC_GTCACGTC	132	141	0.93617	1_day_old
TGGGTTTC_CCTGCGGG_AAGGAATC_GCGGTTAA	716	822	0.871046	1_day_old
TGGGTTTC_CCCTTGGA_GTCCTTCG_TGCGAAGT	676	800	0.845	1_day_old
TGGGTTTC_CCCTTGGA_GTCCTTCG_GTCACGTC	205	243	0.843621	1_day_old
TGGGTTTC_CCCTTGGA_AAGGAATC_TGCGAAGT	143	165	0.866667	1_day_old
TGGGTTTC_CCCTTGGA_AAGGAATC_CCATTGTG	1105	1256	0.879777	1_day_old
TGGGTTTC_CCCTTGGA_AAGGAATC_AATAACGT	236	267	0.883895	1_day_old
TGGGTTTC_CCAGTTTA_CATTGTGG_GTCACGTC	1192	1350	0.882963	1_day_old
TGGGTTTC_CCACCGTT_AAGGAATC_TGCGAAGT	333	358	0.930168	1_day_old
TGGGTTTC_CCACCGTT_AAGGAATC_CCATTGTG	908	1018	0.891945	1_day_old
TGGGTTTC_CAGCAACG_GTCCTTCG_TGCGAAGT	1099	1248	0.880609	1_day_old
TGGGTTTC_CAGCAACG_AAGGAATC_TGCGAAGT	218	244	0.893443	1_day_old
TGGGTTTC_ATTGGGTC_ATGTAGAC_CGGCGACA	347	393	0.882952	1_day_old
TGGGTTTC_ATTGGGTC_ATGTAGAC_AATTCTAA	117	130	0.9	1_day_old
TGGGTTTC_ATTGGGTC_AAGGAATC_TTACGCCG	1077	1236	0.871359	1_day_old
TGGGTTTC_ATTACCGT_GTCCTTCG_AATTCTAA	3176	3597	0.882958	1_day_old
TGGGTTTC_ATTACCGT_CATTGTGG_CCATTGTG	482	559	0.862254	1_day_old
TGGGTTTC_ATTACCGT_ATGTAGAC_GTCACGTC	433	484	0.894628	1_day_old
TGGGTTTC_ATTACCGT_AAGGAATC_CGGCGACA	122	128	0.953125	1_day_old
TGGGTTTC_ATGGTCAT_TAACGATT_AATAACGT	270	308	0.876623	1_day_old
TGGGTTTC_ATGGTCAT_GTCCTTCG_AATTCTAA	256	285	0.898246	1_day_old
TGGGTTTC_ATGGTCAT_AAGGAATC_CCATTGTG	298	331	0.900302	1_day_old
TGGGTTTC_ATGGTCAT_AAGGAATC_AATAACGT	156	185	0.843243	1_day_old
TGGGTTTC_ATCGAATG_GTTATCCG_GCGGTTAA	380	433	0.877598	1_day_old
TGGGTTTC_ATCGAATG_GTCCTTCG_GTCACGTC	1177	1330	0.884962	1_day_old
TGGGTTTC_ATCGAATG_CATTGTGG_TGCGAAGT	132	153	0.862745	1_day_old
TGGGTTTC_ATCGAATG_CATTGTGG_GCGGTTAA	2835	3195	0.887324	1_day_old
TGGGTTTC_ATCGAATG_AAGGAATC_GCGGTTAA	849	968	0.877066	1_day_old
TGGGTTTC_ATCCAGGA_AAGGAATC_AATAACGT	951	1098	0.86612	1_day_old
TGGGTTTC_AGTCCGAG_GTCCTTCG_TGCGAAGT	155	175	0.885714	1_day_old
TGGGTTTC_AGTCCGAG_CGAGCGCT_AATAACGT	186	209	0.889952	1_day_old
TGGGTTTC_AGGTTGCC_GTCCTTCG_TGCGAAGT	364	413	0.881356	1_day_old
TGGGTTTC_AGGTTGCC_ATGTAGAC_GTCACGTC	167	184	0.907609	1_day_old
TGGGTTTC_AGGTTGCC_AAGGAATC_CCATTGTG	241	287	0.839721	1_day_old
TGGGTTTC_AGCCGTTC_TAACGATT_GTCACGTC	387	434	0.891705	1_day_old
TGGGTTTC_AGCCGTTC_GTCCTTCG_TTACGCCG	409	477	0.857442	1_day_old
TGGGTTTC_AGCCGTTC_GTCCTTCG_CGGCGACA	379	433	0.875289	1_day_old
TGGGTTTC_AGCCGTTC_AAGGAATC_TTACGCCG	752	858	0.876457	1_day_old
TGGGTTTC_AGCCGTTC_AAGGAATC_AATTCTAA	168	199	0.844221	1_day_old
TGGGTTTC_AGAGTAGA_GTCCTTCG_GCGGTTAA	1043	1204	0.866279	1_day_old
TGGGTTTC_AGAGTAGA_CATTGTGG_CGGCGACA	629	712	0.883427	1_day_old
TGGGTTTC_AGAGTAGA_ATGTAGAC_AATAACGT	1490	1685	0.884273	1_day_old
TGGGTTTC_AGAGTAGA_AAGGAATC_GTCACGTC	114	131	0.870229	1_day_old
TGGGTTTC_AGAGTAGA_AAGGAATC_AATAACGT	384	448	0.857143	1_day_old
TGGGTTTC_AGAGTAGA_AAGGAATC_AATAACGT	2545	2904	0.876377	1_day_old
TGGGTTTC_AGAGATCT_TAACGATT_TGCGAAGT	236	265	0.890566	1_day_old
TGGGTTTC_AGAGATCT_TAACGATT_GTCACGTC	287	326	0.880368	1_day_old
TGGGTTTC_AGAGATCT_GTCCTTCG_GCGGTTAA	124	137	0.905109	1_day_old
TGGGTTTC_AGAGATCT_GTCCTTCG_GCGGTTAA	886	971	0.912461	1_day_old
TGGGTTTC_AGAGATCT_ATGTAGAC_TTACGCCG	215	232	0.926724	1_day_old
TGGGTTTC_AGAGATCT_AAGGAATC_CCATTGTG	113	139	0.81295	1_day_old
TGGGTTTC_ACTTGTTG_TAACGATT_GTCACGTC	224	254	0.88189	1_day_old
TGGGTTTC_ACTTGTTG_GTCCTTCG_TTACGCCG	171	205	0.834146	1_day_old
TGGGTTTC_ACTTGTTG_CGAGCGCT_CCATTGTG	1117	1295	0.862548	1_day_old
TGGGTTTC_ACTTGTTG_ATGTAGAC_CGGCGACA	3357	4052	0.82848	1_day_old
TGGGTTTC_ACTTGTTG_AAGGAATC_CCATTGTG	1056	1209	0.873449	1_day_old
TGGGTTTC_ACTTAGAA_TAACGATT_CCATTGTG	1076	1202	0.895175	1_day_old
TGGGTTTC_ACTTAGAA_GTCCTTCG_CGGCGACA	210	239	0.878661	1_day_old
TGGGTTTC_ACTTAGAA_ATGTAGAC_GTCACGTC	1210	1387	0.872386	1_day_old
TGGGTTTC_ACTTAGAA_AAGGAATC_TGCGAAGT	165	187	0.882353	1_day_old
TGGGTTTC_ACTGCATA_TAACGATT_AATAACGT	589	664	0.887048	1_day_old
TGGGTTTC_ACTGCATA_GTTATCCG_GTCACGTC	3186	3678	0.866232	1_day_old
TGGGTTTC_ACTGCATA_GTTATCCG_CGGCGACA	1141	1333	0.855964	1_day_old
TGGGTTTC_ACTGCATA_GTCCTTCG_GCGGTTAA	726	800	0.9075	1_day_old
TGGGTTTC_ACTGCATA_CATTGTGG_CGGCGACA	2880	3330	0.864865	1_day_old
TGGGTTTC_ACGCGCAG_GTCCTTCG_TTACGCCG	296	334	0.886228	1_day_old
TGGGTTTC_ACGCGCAG_ATGTAGAC_CGGCGACA	821	924	0.888528	1_day_old
TGGGTTTC_ACGCGCAG_AAGGAATC_TGCGAAGT	720	815	0.883436	1_day_old
TGGGTTTC_ACGCGCAG_AAGGAATC_CCATTGTG	163	182	0.895604	1_day_old
TGGGTTTC_ACGCGCAG_AAGGAATC_AATTCTAA	960	1076	0.892193	1_day_old
TGGGTTTC_ACGATAAC_TAACGATT_GTCACGTC	443	510	0.868627	1_day_old
TGGGTTTC_ACGATAAC_GTCCTTCG_GCGGTTAA	884	1000	0.884	1_day_old
TGGGTTTC_ACCGGCCC_TAACGATT_GCGGTTAA	94	104	0.903846	1_day_old
TGGGTTTC_ACCGGCCC_GTCCTTCG_TTACGCCG	128	151	0.847682	1_day_old
TGGGTTTC_ACATTCGT_GTCCTTCG_AATAACGT	395	445	0.88764	1_day_old
TGGGTTTC_ACATTCGT_CATTGTGG_CGGCGACA	2632	3024	0.87037	1_day_old
TGGGTTTC_ACATTCGT_AAGGAATC_AATAACGT	144	169	0.852071	1_day_old
TGGGTTTC_AATCTACA_TAACGATT_AATAACGT	1381	1546	0.893273	1_day_old
TGGGTTTC_AATCTACA_GTTATCCG_GCGGTTAA	3709	4174	0.888596	1_day_old
TGGGTTTC_AATCTACA_GTCCTTCG_GTCACGTC	1571	1831	0.858001	1_day_old
TGGGTTTC_AATCTACA_GTCCTTCG_AATTCTAA	135	161	0.838509	1_day_old
TGGGTTTC_AATCTACA_AAGGAATC_CCATTGTG	3150	3680	0.855978	1_day_old
TGGGTTTC_AAGGAGTA_TAACGATT_CCATTGTG	883	1004	0.879482	1_day_old
TGGGTTTC_AACATGAT_ATGTAGAC_GCGGTTAA	114	134	0.850746	1_day_old
TGGATCTG_TTTCTAGC_TAACGATT_GTCACGTC	1025	1203	0.852037	1_day_old
TGGATCTG_TTTCTAGC_GTCCTTCG_TGCGAAGT	483	541	0.892791	1_day_old
TGGATCTG_TTTCTAGC_AAGGAATC_TTACGCCG	894	1021	0.875612	1_day_old
TGGATCTG_TTGCCTAA_GTCCTTCG_TGCGAAGT	420	471	0.89172	1_day_old
TGGATCTG_TTGCCTAA_AAGGAATC_TTACGCCG	835	922	0.90564	1_day_old
TGGATCTG_TTGCCTAA_AAGGAATC_AATAACGT	728	814	0.894349	1_day_old
TGGATCTG_TTCGTGCA_TAACGATT_TTACGCCG	473	522	0.90613	1_day_old
TGGATCTG_TTCGTGCA_CGAGCGCT_GTCACGTC	889	1021	0.870715	1_day_old
TGGATCTG_TTCGTGCA_AAGGAATC_CCATTGTG	3033	3441	0.88143	1_day_old
TGGATCTG_TTAACTTG_TAACGATT_CGGCGACA	689	776	0.887887	1_day_old
TGGATCTG_TTAACTTG_GTTATCCG_GTCACGTC	5265	6129	0.859031	1_day_old
TGGATCTG_TTAACTTG_ATGTAGAC_TTACGCCG	270	302	0.89404	1_day_old
TGGATCTG_TTAACTTG_ATGTAGAC_CCATTGTG	248	284	0.873239	1_day_old
TGGATCTG_TTAACTTG_AAGGAATC_CCATTGTG	769	858	0.89627	1_day_old
TGGATCTG_TTAACTTG_AAGGAATC_AATTCTAA	1022	1177	0.868309	1_day_old
TGGATCTG_TGTTCCTG_TCGACCGA_TGCGAAGT	2042	2451	0.833129	1_day_old
TGGATCTG_TGTTCCTG_TAACGATT_GCGGTTAA	456	506	0.901186	1_day_old
TGGATCTG_TGTTCCTG_GTCCTTCG_GCGGTTAA	2549	2941	0.866712	1_day_old
TGGATCTG_TGGGCGGT_TAACGATT_CGGCGACA	596	678	0.879056	1_day_old
TGGATCTG_TGGGCGGT_GTCCTTCG_AATTCTAA	1129	1317	0.857251	1_day_old
TGGATCTG_TGGGCGGT_GTCCTTCG_AATAACGT	850	965	0.880829	1_day_old
TGGATCTG_TGGGCGGT_AAGGAATC_AATAACGT	113	131	0.862595	1_day_old
TGGATCTG_TGGAAATC_AAGGAATC_AATAACGT	175	193	0.906736	1_day_old
TGGATCTG_TGCATACT_AAGGAATC_CGGCGACA	148	164	0.902439	1_day_old
TGGATCTG_TGATGAAA_GTCCTTCG_CGGCGACA	534	602	0.887043	1_day_old
TGGATCTG_TGATGAAA_GTCCTTCG_CCATTGTG	437	510	0.856863	1_day_old
TGGATCTG_TGATGAAA_ATGTAGAC_GTCACGTC	957	1111	0.861386	1_day_old
TGGATCTG_TGATGAAA_ATGTAGAC_AATAACGT	1415	1628	0.869165	1_day_old
TGGATCTG_TCTGGCGA_GTTATCCG_CGGCGACA	990	1151	0.860122	1_day_old
TGGATCTG_TCTGGCGA_GTCCTTCG_TGCGAAGT	216	253	0.853755	1_day_old
TGGATCTG_TCTGGCGA_ATGTAGAC_GCGGTTAA	320	369	0.867209	1_day_old
TGGATCTG_TCTGGCGA_ATGTAGAC_CGGCGACA	500	570	0.877193	1_day_old
TGGATCTG_TCTGGCGA_ATGTAGAC_CCATTGTG	327	365	0.89589	1_day_old
TGGATCTG_TCCGAGTT_TAACGATT_CGGCGACA	324	352	0.920455	1_day_old
TGGATCTG_TCCGAGTT_TAACGATT_CCATTGTG	397	458	0.866812	1_day_old
TGGATCTG_TCCGAGTT_ATGTAGAC_CCATTGTG	125	151	0.827815	1_day_old
TGGATCTG_TCCGAGTT_AAGGAATC_CGGCGACA	392	452	0.867257	1_day_old
TGGATCTG_TCACATGG_ATGTAGAC_AATAACGT	641	726	0.88292	1_day_old
TGGATCTG_TCAAGAGC_TAACGATT_CGGCGACA	455	537	0.8473	1_day_old
TGGATCTG_TCAAGAGC_GTCCTTCG_CGGCGACA	362	404	0.89604	1_day_old
TGGATCTG_TCAAGAGC_ATGTAGAC_GCGGTTAA	638	738	0.864499	1_day_old
TGGATCTG_TATTTGCG_ATGTAGAC_AATTCTAA	105	115	0.913043	1_day_old
TGGATCTG_TATTTGCG_AAGGAATC_CGGCGACA	147	164	0.896341	1_day_old
TGGATCTG_TATCCTCT_AAGGAATC_TTACGCCG	510	566	0.90106	1_day_old
TGGATCTG_TAGATCGC_GTTATCCG_GTCACGTC	937	1075	0.871628	1_day_old
TGGATCTG_TAGATCGC_GTTATCCG_CCATTGTG	3187	3722	0.85626	1_day_old
TGGATCTG_TAGATCGC_GTCCTTCG_TGCGAAGT	217	249	0.871486	1_day_old
TGGATCTG_TACTGACC_TAACGATT_GTCACGTC	174	190	0.915789	1_day_old
TGGATCTG_TACTGACC_GTTATCCG_GTCACGTC	86	101	0.851485	1_day_old
TGGATCTG_TACTGACC_CGAGCGCT_GTCACGTC	90	103	0.873786	1_day_old
TGGATCTG_TACTGACC_CATTGTGG_GTCACGTC	216	260	0.830769	1_day_old
TGGATCTG_TACTGACC_AAGGAATC_TTACGCCG	1302	1476	0.882114	1_day_old
TGGATCTG_TAAGTTAC_GTCCTTCG_TTACGCCG	1227	1439	0.852675	1_day_old
TGGATCTG_TAAGTTAC_GTCCTTCG_AATTCTAA	784	862	0.909513	1_day_old
TGGATCTG_TAAGTTAC_ATGTAGAC_GCGGTTAA	804	902	0.891353	1_day_old
TGGATCTG_TAAGTTAC_ATGTAGAC_CGGCGACA	939	1131	0.830239	1_day_old
TGGATCTG_TAAGTTAC_ATGTAGAC_CCATTGTG	1559	1744	0.893922	1_day_old
TGGATCTG_TAAGTTAC_ATGTAGAC_CCATTGTG	861	958	0.898747	1_day_old
TGGATCTG_TAAGTTAC_ATGTAGAC_AATTCTAA	406	489	0.830266	1_day_old
TGGATCTG_TAAGTTAC_AAGGAATC_GTCACGTC	86	109	0.788991	1_day_old
TGGATCTG_TAAGTTAC_AAGGAATC_GCGGTTAA	896	1047	0.855778	1_day_old
TGGATCTG_TAACCAAG_TAACGATT_AATTCTAA	513	580	0.884483	1_day_old
TGGATCTG_TAACCAAG_AAGGAATC_GTCACGTC	355	404	0.878713	1_day_old
TGGATCTG_TAACCAAG_AAGGAATC_AATAACGT	1844	2122	0.868992	1_day_old
TGGATCTG_GTGTATCG_TAACGATT_CGGCGACA	407	467	0.87152	1_day_old
TGGATCTG_GTGTATCG_GTCCTTCG_AATAACGT	90	102	0.882353	1_day_old
TGGATCTG_GTGTATCG_CATTGTGG_GTCACGTC	427	490	0.871429	1_day_old
TGGATCTG_GTGTATCG_AAGGAATC_CCATTGTG	1047	1167	0.897172	1_day_old
TGGATCTG_GTCGGACT_TAACGATT_AATAACGT	418	465	0.898925	1_day_old
TGGATCTG_GTCGGACT_GTCCTTCG_TTACGCCG	1430	1600	0.89375	1_day_old
TGGATCTG_GTCGGACT_AAGGAATC_AATTCTAA	447	515	0.867961	1_day_old
TGGATCTG_GTAAGGAG_TCGACCGA_CCATTGTG	1162	1327	0.875659	1_day_old
TGGATCTG_GTAAGGAG_ATGTAGAC_AATAACGT	322	376	0.856383	1_day_old
TGGATCTG_GGTTCAAT_GTTATCCG_GTCACGTC	2745	3300	0.831818	1_day_old
TGGATCTG_GGTTCAAT_GTTATCCG_CGGCGACA	2409	2826	0.852442	1_day_old
TGGATCTG_GGTTCAAT_GTCCTTCG_AATAACGT	1616	1834	0.881134	1_day_old
TGGATCTG_GGTTCAAT_ATGTAGAC_CCATTGTG	4755	5352	0.888453	1_day_old
TGGATCTG_GGTGAAGG_TCGACCGA_TTACGCCG	93	107	0.869159	1_day_old
TGGATCTG_GGTGAAGG_GTTATCCG_TTACGCCG	2736	3142	0.870783	1_day_old
TGGATCTG_GGTGAAGG_CATTGTGG_GTCACGTC	191	232	0.823276	1_day_old
TGGATCTG_GGTGAAGG_ATGTAGAC_TTACGCCG	743	847	0.877214	1_day_old
TGGATCTG_GGTGAAGG_ATGTAGAC_TGCGAAGT	114	129	0.883721	1_day_old
TGGATCTG_GGTGAAGG_ATGTAGAC_CGGCGACA	549	620	0.885484	1_day_old
TGGATCTG_GGTGAAGG_AAGGAATC_TGCGAAGT	415	468	0.886752	1_day_old
TGGATCTG_GGGCTTGG_TCGACCGA_TTACGCCG	2776	3222	0.861577	1_day_old
TGGATCTG_GGGCTTGG_GTCCTTCG_AATAACGT	97	115	0.843478	1_day_old
TGGATCTG_GGCACGGA_TAACGATT_TGCGAAGT	268	308	0.87013	1_day_old
TGGATCTG_GGCACGGA_TAACGATT_CCATTGTG	793	905	0.876243	1_day_old
TGGATCTG_GGCACGGA_AAGGAATC_CCATTGTG	352	408	0.862745	1_day_old
TGGATCTG_GCCCACGT_AAGGAATC_TTACGCCG	112	132	0.848485	1_day_old
TGGATCTG_GCATTAAG_ATGTAGAC_GTCACGTC	709	809	0.876391	1_day_old
TGGATCTG_GCATTAAG_ATGTAGAC_CGGCGACA	125	135	0.925926	1_day_old
TGGATCTG_GCATTAAG_AAGGAATC_GCGGTTAA	1105	1262	0.875594	1_day_old
TGGATCTG_GCATTAAG_AAGGAATC_AATTCTAA	698	807	0.864932	1_day_old
TGGATCTG_GCAGCCTC_CGAGCGCT_AATTCTAA	3059	3549	0.861933	1_day_old
TGGATCTG_GCAGCCTC_ATGTAGAC_CGGCGACA	1033	1204	0.857973	1_day_old
TGGATCTG_GCAGCCTC_ATGTAGAC_AATTCTAA	109	126	0.865079	1_day_old
TGGATCTG_GCAAATTT_TAACGATT_GCGGTTAA	136	167	0.814371	1_day_old
TGGATCTG_GCAAATTT_TAACGATT_CCATTGTG	200	237	0.843882	1_day_old
TGGATCTG_GATTCCCA_GTCCTTCG_GTCACGTC	1042	1182	0.881557	1_day_old
[truncated: 38,983 more rows]

## Sheet: Table_S5_blacklistratio_per_ce
cell	count	total	BlacklistRatio	sample
AAACGGTC_AGCCGTTC_TAACGATT_CCATTGTG	1080	40490	0.0266733	1_day_old
AAACGGTC_CCCTTGGA_GTCCTTCG_GTCACGTC	145	5792	0.0250345	1_day_old
AAACGGTC_CCTTATGT_ATGTAGAC_TTACGCCG	6	698	0.00859599	1_day_old
AAACGGTC_CGCCAGAT_TAACGATT_TTACGCCG	281	9223	0.0304673	1_day_old
AAACGGTC_CGGACTGC_AAGGAATC_AATTCTAA	197	8158	0.0241481	1_day_old
AAACGGTC_CGGACTGC_AAGGAATC_CCATTGTG	129	4504	0.0286412	1_day_old
AAACGGTC_CGGACTGC_TAACGATT_AATAACGT	41	2257	0.0181657	1_day_old
AAACGGTC_CTTTAACA_GTCCTTCG_AATAACGT	16	1459	0.0109664	1_day_old
AAACGGTC_GATCATTC_AAGGAATC_AATTCTAA	13	943	0.0137858	1_day_old
AAACGGTC_GATTCCCA_GTCCTTCG_TTACGCCG	219	6940	0.0315562	1_day_old
AAACGGTC_GCAAATTT_ATGTAGAC_GCGGTTAA	35	1556	0.0224936	1_day_old
AAACGGTC_GGGCTTGG_ATGTAGAC_AATAACGT	217	6853	0.031665	1_day_old
AAACGGTC_TAAGTTAC_TAACGATT_TGCGAAGT	53	1832	0.0289301	1_day_old
AAACGGTC_TCCATCAA_TAACGATT_CCATTGTG	35	1360	0.0257353	1_day_old
AAACGGTC_TCCGAGTT_ATGTAGAC_CGGCGACA	39	991	0.0393542	1_day_old
AAACGGTC_TTCGTGCA_ATGTAGAC_AATTCTAA	178	5438	0.0327326	1_day_old
AAACGGTC_TTCGTGCA_GTCCTTCG_CGGCGACA	146	5200	0.0280769	1_day_old
AAACGGTC_TTCGTGCA_GTCCTTCG_GCGGTTAA	237	5594	0.0423668	1_day_old
AAATACAG_AACATGAT_GTCCTTCG_TTACGCCG	386	18534	0.0208266	1_day_old
AAATACAG_AACATGAT_TAACGATT_TTACGCCG	679	21445	0.0316624	1_day_old
AAATACAG_AAGGAGTA_GTCCTTCG_TGCGAAGT	412	15738	0.0261787	1_day_old
AAATACAG_AATCTACA_GTCCTTCG_GCGGTTAA	147	6119	0.0240235	1_day_old
AAATACAG_ACATTCGT_ATGTAGAC_TTACGCCG	644	24051	0.0267764	1_day_old
AAATACAG_ACCGGCCC_TAACGATT_AATTCTAA	89	2885	0.0308492	1_day_old
AAATACAG_AGCCGTTC_AAGGAATC_TTACGCCG	266	8296	0.0320636	1_day_old
AAATACAG_AGCCGTTC_GTCCTTCG_GCGGTTAA	320	10148	0.0315333	1_day_old
AAATACAG_AGCCGTTC_TAACGATT_AATAACGT	89	5495	0.0161965	1_day_old
AAATACAG_AGGTTGCC_AAGGAATC_TTACGCCG	186	7604	0.0244608	1_day_old
AAATACAG_CCACCGTT_AAGGAATC_AATAACGT	139	2802	0.0496074	1_day_old
AAATACAG_CCCTTGGA_GTCCTTCG_AATAACGT	249	8934	0.0278711	1_day_old
AAATACAG_CCTTATGT_AAGGAATC_GTCACGTC	186	7368	0.0252443	1_day_old
AAATACAG_CGATAGGG_AAGGAATC_CGGCGACA	121	5656	0.0213932	1_day_old
AAATACAG_CGCCAGAT_ATGTAGAC_TGCGAAGT	119	4326	0.0275081	1_day_old
AAATACAG_CGGACTGC_ATGTAGAC_TTACGCCG	406	15355	0.0264409	1_day_old
AAATACAG_CGTACCAA_TAACGATT_GTCACGTC	135	4112	0.0328307	1_day_old
AAATACAG_CGTAGACC_ATGTAGAC_GTCACGTC	181	7255	0.0249483	1_day_old
AAATACAG_CTAGAAGT_TAACGATT_AATAACGT	17	843	0.0201661	1_day_old
AAATACAG_GAGACGTG_ATGTAGAC_GTCACGTC	292	9187	0.031784	1_day_old
AAATACAG_GATCATTC_GTCCTTCG_AATTCTAA	285	9656	0.0295153	1_day_old
AAATACAG_GCAAATTT_AAGGAATC_GCGGTTAA	312	11552	0.0270083	1_day_old
AAATACAG_GCAAATTT_AAGGAATC_TGCGAAGT	122	3969	0.0307382	1_day_old
AAATACAG_GCAAATTT_GTCCTTCG_AATTCTAA	493	16308	0.0302306	1_day_old
AAATACAG_GCCCACGT_AAGGAATC_AATAACGT	22	376	0.0585106	1_day_old
AAATACAG_GGGCTTGG_GTCCTTCG_AATAACGT	92	5332	0.0172543	1_day_old
AAATACAG_TAACCAAG_ATGTAGAC_CGGCGACA	322	12818	0.0251209	1_day_old
AAATACAG_TAAGTTAC_GTCCTTCG_AATTCTAA	22	1430	0.0153846	1_day_old
AAATACAG_TACTGACC_TAACGATT_GCGGTTAA	81	2218	0.0365194	1_day_old
AAATACAG_TATCCTCT_AAGGAATC_GTCACGTC	172	5001	0.0343931	1_day_old
AAATACAG_TATTTGCG_GTCCTTCG_TTACGCCG	310	9820	0.0315682	1_day_old
AAATACAG_TATTTGCG_TAACGATT_CGGCGACA	183	4950	0.0369697	1_day_old
AAATACAG_TCAAGAGC_AAGGAATC_TGCGAAGT	444	12755	0.0348099	1_day_old
AAATACAG_TGGGCGGT_AAGGAATC_TTACGCCG	20	785	0.0254777	1_day_old
AAATACAG_TTGCCTAA_AAGGAATC_TGCGAAGT	151	4645	0.0325081	1_day_old
AACGCCAT_AACATGAT_GTCCTTCG_GTCACGTC	96	3729	0.0257442	1_day_old
AACGCCAT_AAGGAGTA_TAACGATT_TGCGAAGT	11	714	0.0154062	1_day_old
AACGCCAT_AATCTACA_ATGTAGAC_GCGGTTAA	41	1438	0.0285118	1_day_old
AACGCCAT_ACCGGCCC_TAACGATT_AATTCTAA	312	10687	0.0291943	1_day_old
AACGCCAT_ACGCGCAG_GTCCTTCG_CCATTGTG	50	616	0.0811688	1_day_old
AACGCCAT_ACTGCATA_TAACGATT_AATAACGT	82	1984	0.0413306	1_day_old
AACGCCAT_ACTTAGAA_AAGGAATC_GTCACGTC	26	246	0.105691	1_day_old
AACGCCAT_AGAGTAGA_GTCCTTCG_TTACGCCG	226	5787	0.039053	1_day_old
AACGCCAT_ATGGTCAT_ATGTAGAC_GCGGTTAA	56	1840	0.0304348	1_day_old
AACGCCAT_ATTACCGT_AAGGAATC_TTACGCCG	61	1184	0.0515203	1_day_old
AACGCCAT_ATTGGGTC_TAACGATT_AATTCTAA	112	5133	0.0218196	1_day_old
AACGCCAT_CAGCAACG_GTCCTTCG_GTCACGTC	222	9145	0.0242756	1_day_old
AACGCCAT_CCAGTTTA_AAGGAATC_TGCGAAGT	43	1515	0.0283828	1_day_old
AACGCCAT_CCAGTTTA_GTCCTTCG_TGCGAAGT	21	596	0.0352349	1_day_old
AACGCCAT_CCCTTGGA_GTCCTTCG_TTACGCCG	30	425	0.0705882	1_day_old
AACGCCAT_CCTGCGGG_GTCCTTCG_TGCGAAGT	9	631	0.0142631	1_day_old
AACGCCAT_CGATAGGG_ATGTAGAC_CGGCGACA	45	627	0.0717703	1_day_old
AACGCCAT_CGGACTGC_GTCCTTCG_CCATTGTG	373	13997	0.0266486	1_day_old
AACGCCAT_CGTACCAA_ATGTAGAC_CCATTGTG	141	3658	0.0385457	1_day_old
AACGCCAT_CTAAGCCT_AAGGAATC_GTCACGTC	30	562	0.0533808	1_day_old
AACGCCAT_CTAAGCCT_GTCCTTCG_TGCGAAGT	99	3038	0.0325872	1_day_old
AACGCCAT_CTTTAACA_AAGGAATC_CCATTGTG	223	6452	0.0345629	1_day_old
AACGCCAT_CTTTAACA_TAACGATT_TGCGAAGT	518	15291	0.0338761	1_day_old
AACGCCAT_GAACTCGA_TAACGATT_TGCGAAGT	30	1237	0.0242522	1_day_old
AACGCCAT_GAGACGTG_AAGGAATC_GTCACGTC	76	2566	0.0296181	1_day_old
AACGCCAT_GAGACGTG_TAACGATT_GCGGTTAA	74	1870	0.0395722	1_day_old
AACGCCAT_GATTCCCA_ATGTAGAC_AATAACGT	148	4475	0.0330726	1_day_old
AACGCCAT_GATTCCCA_GTCCTTCG_GTCACGTC	329	8315	0.039567	1_day_old
AACGCCAT_GGCACGGA_GTCCTTCG_GCGGTTAA	185	6358	0.0290972	1_day_old
AACGCCAT_GGTGAAGG_AAGGAATC_TTACGCCG	6	160	0.0375	1_day_old
AACGCCAT_GGTTCAAT_GTCCTTCG_TGCGAAGT	145	4989	0.0290639	1_day_old
AACGCCAT_TAAGTTAC_TAACGATT_CCATTGTG	347	11350	0.0305727	1_day_old
AACGCCAT_TAGATCGC_GTCCTTCG_GCGGTTAA	282	10459	0.0269624	1_day_old
AACGCCAT_TAGATCGC_TAACGATT_TGCGAAGT	100	4322	0.0231374	1_day_old
AACGCCAT_TGCATACT_TAACGATT_TTACGCCG	29	792	0.0366162	1_day_old
AACGCCAT_TGGAAATC_AAGGAATC_AATTCTAA	317	10022	0.0316304	1_day_old
AAGAGGCA_AACATGAT_AAGGAATC_TTACGCCG	88	4340	0.0202765	1_day_old
AAGAGGCA_AATCTACA_ATGTAGAC_TTACGCCG	289	9826	0.0294118	1_day_old
AAGAGGCA_ACATTCGT_AAGGAATC_GCGGTTAA	43	2297	0.0187201	1_day_old
AAGAGGCA_ACATTCGT_ATGTAGAC_CCATTGTG	139	4315	0.0322132	1_day_old
AAGAGGCA_ACATTCGT_ATGTAGAC_CGGCGACA	30	920	0.0326087	1_day_old
AAGAGGCA_ACGATAAC_AAGGAATC_TGCGAAGT	67	1815	0.0369146	1_day_old
AAGAGGCA_ACGCGCAG_GTCCTTCG_CCATTGTG	97	1132	0.085689	1_day_old
AAGAGGCA_ACTTGTTG_ATGTAGAC_TGCGAAGT	91	2238	0.0406613	1_day_old
AAGAGGCA_AGCCGTTC_TAACGATT_TGCGAAGT	55	2111	0.026054	1_day_old
AAGAGGCA_AGGTTGCC_ATGTAGAC_CGGCGACA	235	5510	0.0426497	1_day_old
AAGAGGCA_ATCGAATG_ATGTAGAC_CCATTGTG	96	3917	0.0245086	1_day_old
AAGAGGCA_CCAGTTTA_GTCCTTCG_AATAACGT	24	478	0.0502092	1_day_old
AAGAGGCA_CCCTTGGA_AAGGAATC_TGCGAAGT	68	2355	0.0288747	1_day_old
AAGAGGCA_CCCTTGGA_GTCCTTCG_TTACGCCG	22	215	0.102326	1_day_old
AAGAGGCA_CCCTTGGA_TAACGATT_AATTCTAA	71	2737	0.0259408	1_day_old
AAGAGGCA_CCCTTGGA_TAACGATT_CCATTGTG	74	2045	0.0361858	1_day_old
AAGAGGCA_CGATAGGG_AAGGAATC_AATTCTAA	35	445	0.0786517	1_day_old
AAGAGGCA_CGATAGGG_ATGTAGAC_CGGCGACA	63	998	0.0631263	1_day_old
AAGAGGCA_CGGACTGC_AAGGAATC_AATTCTAA	240	9160	0.0262009	1_day_old
AAGAGGCA_CGTAGACC_TAACGATT_CCATTGTG	28	720	0.0388889	1_day_old
AAGAGGCA_CTAAGCCT_AAGGAATC_GTCACGTC	6	149	0.0402685	1_day_old
AAGAGGCA_CTTTAACA_ATGTAGAC_GCGGTTAA	208	5498	0.0378319	1_day_old
AAGAGGCA_GACGTGGC_GTCCTTCG_CGGCGACA	29	1488	0.0194892	1_day_old
AAGAGGCA_GCATTAAG_ATGTAGAC_GCGGTTAA	213	5472	0.0389254	1_day_old
AAGAGGCA_GGCACGGA_GTCCTTCG_AATAACGT	39	867	0.0449827	1_day_old
AAGAGGCA_GGCACGGA_GTCCTTCG_GCGGTTAA	203	8216	0.0247079	1_day_old
AAGAGGCA_GGGCTTGG_AAGGAATC_AATTCTAA	194	8470	0.0229044	1_day_old
AAGAGGCA_GGTGAAGG_AAGGAATC_GTCACGTC	275	7212	0.0381309	1_day_old
AAGAGGCA_GGTGAAGG_AAGGAATC_TTACGCCG	24	475	0.0505263	1_day_old
AAGAGGCA_GGTTCAAT_AAGGAATC_CCATTGTG	397	11296	0.0351452	1_day_old
AAGAGGCA_TAGATCGC_ATGTAGAC_AATAACGT	249	9274	0.0268493	1_day_old
AAGAGGCA_TATTTGCG_GTCCTTCG_TTACGCCG	125	4355	0.0287026	1_day_old
AAGAGGCA_TGATTGTT_ATGTAGAC_AATTCTAA	101	3624	0.0278698	1_day_old
AAGAGGCA_TTAACTTG_ATGTAGAC_GTCACGTC	226	5520	0.040942	1_day_old
AAGAGGCA_TTAACTTG_GTCCTTCG_TGCGAAGT	97	3554	0.0272932	1_day_old
AAGAGGCA_TTTCTAGC_TAACGATT_AATTCTAA	53	2546	0.020817	1_day_old
AATGGTAG_AAGGAGTA_GTCCTTCG_GCGGTTAA	203	6652	0.0305171	1_day_old
AATGGTAG_ACCGGCCC_AAGGAATC_GCGGTTAA	100	5358	0.0186637	1_day_old
AATGGTAG_ACCGGCCC_TAACGATT_CCATTGTG	157	4214	0.0372568	1_day_old
AATGGTAG_ACTGCATA_AAGGAATC_GCGGTTAA	82	2362	0.0347163	1_day_old
AATGGTAG_AGCCGTTC_TAACGATT_CCATTGTG	71	2800	0.0253571	1_day_old
AATGGTAG_CCCTTGGA_ATGTAGAC_GTCACGTC	133	6464	0.0205755	1_day_old
AATGGTAG_CCTTATGT_TAACGATT_GTCACGTC	71	2240	0.0316964	1_day_old
AATGGTAG_GACGTGGC_TAACGATT_GCGGTTAA	134	3343	0.0400838	1_day_old
AATGGTAG_GAGACGTG_ATGTAGAC_GTCACGTC	130	5242	0.0247997	1_day_old
AATGGTAG_GGGCTTGG_TAACGATT_CGGCGACA	64	3287	0.0194706	1_day_old
AATGGTAG_GGTGAAGG_AAGGAATC_GCGGTTAA	176	5850	0.0300855	1_day_old
AATGGTAG_TAACCAAG_AAGGAATC_GTCACGTC	186	5437	0.03421	1_day_old
AATGGTAG_TCCATCAA_ATGTAGAC_GTCACGTC	263	7014	0.0374964	1_day_old
AATGGTAG_TGGAAATC_AAGGAATC_GCGGTTAA	519	14057	0.0369211	1_day_old
AATGGTAG_TTCGTGCA_TAACGATT_TGCGAAGT	88	3059	0.0287676	1_day_old
AATGGTAG_TTGCCTAA_AAGGAATC_CGGCGACA	224	7114	0.0314872	1_day_old
AATTCGTT_AACATGAT_AAGGAATC_GCGGTTAA	404	16507	0.0244745	1_day_old
AATTCGTT_ACATTCGT_AAGGAATC_TGCGAAGT	126	5616	0.0224359	1_day_old
AATTCGTT_ACATTCGT_TAACGATT_TGCGAAGT	90	2342	0.0384287	1_day_old
AATTCGTT_ACCGGCCC_AAGGAATC_AATTCTAA	193	6095	0.0316653	1_day_old
AATTCGTT_ACCGGCCC_GTCCTTCG_GCGGTTAA	395	12912	0.0305917	1_day_old
AATTCGTT_ACGCGCAG_TAACGATT_AATAACGT	199	6582	0.030234	1_day_old
AATTCGTT_AGAGTAGA_AAGGAATC_CCATTGTG	224	8695	0.0257619	1_day_old
AATTCGTT_AGCCGTTC_AAGGAATC_CCATTGTG	121	5208	0.0232335	1_day_old
AATTCGTT_AGTCCGAG_GTCCTTCG_GTCACGTC	74	4389	0.0168603	1_day_old
AATTCGTT_ATCCAGGA_AAGGAATC_CGGCGACA	231	5854	0.0394602	1_day_old
AATTCGTT_ATCCAGGA_TAACGATT_AATAACGT	69	4383	0.0157426	1_day_old
AATTCGTT_ATGGTCAT_TAACGATT_AATTCTAA	43	1795	0.0239554	1_day_old
AATTCGTT_ATTACCGT_TAACGATT_GCGGTTAA	374	11765	0.0317892	1_day_old
AATTCGTT_ATTACCGT_TAACGATT_GTCACGTC	199	6631	0.0300106	1_day_old
AATTCGTT_ATTGGGTC_ATGTAGAC_CCATTGTG	332	10075	0.0329529	1_day_old
AATTCGTT_CCAGTTTA_AAGGAATC_TTACGCCG	315	13819	0.0227947	1_day_old
AATTCGTT_CCCTTGGA_ATGTAGAC_TTACGCCG	159	10813	0.0147045	1_day_old
AATTCGTT_CGCCAGAT_GTCCTTCG_AATAACGT	367	13102	0.028011	1_day_old
AATTCGTT_CGTACCAA_TAACGATT_CGGCGACA	146	4863	0.0300226	1_day_old
AATTCGTT_CTAAGCCT_ATGTAGAC_CCATTGTG	525	13929	0.0376911	1_day_old
AATTCGTT_CTTTAACA_TAACGATT_TGCGAAGT	46	1519	0.0302831	1_day_old
AATTCGTT_GAACTCGA_AAGGAATC_AATTCTAA	300	11610	0.0258398	1_day_old
AATTCGTT_GAGACGTG_ATGTAGAC_GTCACGTC	316	7576	0.0417107	1_day_old
AATTCGTT_GATCATTC_TAACGATT_CGGCGACA	76	2660	0.0285714	1_day_old
AATTCGTT_GCAAATTT_AAGGAATC_AATAACGT	440	16870	0.0260818	1_day_old
AATTCGTT_GCATTAAG_AAGGAATC_TTACGCCG	420	12397	0.0338792	1_day_old
AATTCGTT_GGGCTTGG_GTCCTTCG_TGCGAAGT	179	6348	0.0281979	1_day_old
AATTCGTT_GGTGAAGG_AAGGAATC_TTACGCCG	47	588	0.079932	1_day_old
AATTCGTT_GGTGAAGG_ATGTAGAC_GCGGTTAA	202	7386	0.027349	1_day_old
AATTCGTT_GGTGAAGG_GTCCTTCG_CCATTGTG	114	4628	0.0246327	1_day_old
AATTCGTT_GGTGAAGG_TAACGATT_AATAACGT	123	4810	0.0255717	1_day_old
AATTCGTT_GTAAGGAG_AAGGAATC_CCATTGTG	989	28578	0.034607	1_day_old
AATTCGTT_GTAAGGAG_ATGTAGAC_AATAACGT	74	2757	0.0268408	1_day_old
AATTCGTT_GTCGGACT_TAACGATT_CCATTGTG	171	6857	0.024938	1_day_old
AATTCGTT_TAAGTTAC_AAGGAATC_AATTCTAA	393	12255	0.0320685	1_day_old
AATTCGTT_TAGATCGC_TAACGATT_AATTCTAA	270	8950	0.0301676	1_day_old
AATTCGTT_TATTTGCG_ATGTAGAC_GTCACGTC	353	9700	0.0363918	1_day_old
AATTCGTT_TATTTGCG_GTCCTTCG_TTACGCCG	581	22174	0.0262019	1_day_old
AATTCGTT_TCACATGG_TAACGATT_CGGCGACA	93	2490	0.0373494	1_day_old
AATTCGTT_TCCGAGTT_AAGGAATC_TTACGCCG	98	3852	0.0254413	1_day_old
AATTCGTT_TGATGAAA_AAGGAATC_AATAACGT	383	13723	0.0279093	1_day_old
AATTCGTT_TGCATACT_AAGGAATC_CGGCGACA	212	9129	0.0232227	1_day_old
AATTCGTT_TGCATACT_ATGTAGAC_AATAACGT	283	14144	0.0200085	1_day_old
AATTCGTT_TGCATACT_GTCCTTCG_TTACGCCG	229	8288	0.0276303	1_day_old
AATTCGTT_TTGCCTAA_GTCCTTCG_GCGGTTAA	390	10583	0.0368516	1_day_old
ACAAAGTG_AGCCGTTC_GTCCTTCG_GTCACGTC	169	7824	0.0216002	1_day_old
ACAAAGTG_AGCCGTTC_GTCCTTCG_TTACGCCG	70	2091	0.0334768	1_day_old
ACAAAGTG_AGTCCGAG_AAGGAATC_AATAACGT	199	9797	0.0203123	1_day_old
ACAAAGTG_CAGCAACG_GTCCTTCG_CCATTGTG	577	24918	0.023156	1_day_old
ACAAAGTG_CCAGTTTA_AAGGAATC_AATAACGT	232	6490	0.0357473	1_day_old
ACAAAGTG_CCAGTTTA_ATGTAGAC_GTCACGTC	173	5012	0.0345172	1_day_old
ACAAAGTG_CCTTATGT_AAGGAATC_CGGCGACA	214	7627	0.0280582	1_day_old
ACAAAGTG_CGATAGGG_TAACGATT_AATAACGT	407	14970	0.0271877	1_day_old
ACAAAGTG_CGCCAGAT_GTCCTTCG_TTACGCCG	139	4090	0.0339853	1_day_old
ACAAAGTG_CGGACTGC_ATGTAGAC_CCATTGTG	277	6211	0.0445983	1_day_old
ACAAAGTG_CTAGAAGT_TAACGATT_CCATTGTG	124	6205	0.0199839	1_day_old
ACAAAGTG_CTCTCTAT_GTCCTTCG_CGGCGACA	182	4498	0.0404624	1_day_old
ACAAAGTG_GAGACGTG_TAACGATT_CCATTGTG	145	4712	0.0307725	1_day_old
ACAAAGTG_GAGACGTG_TAACGATT_GCGGTTAA	106	2541	0.0417159	1_day_old
ACAAAGTG_GGTGAAGG_AAGGAATC_TTACGCCG	11	233	0.0472103	1_day_old
ACAAAGTG_TAACCAAG_GTCCTTCG_TGCGAAGT	99	3278	0.0302013	1_day_old
ACAAAGTG_TAACCAAG_TAACGATT_GCGGTTAA	171	5035	0.0339623	1_day_old
ACAAAGTG_TAAGTTAC_AAGGAATC_AATTCTAA	326	8763	0.0372019	1_day_old
ACAAAGTG_TCAAGAGC_GTCCTTCG_TTACGCCG	275	8823	0.0311685	1_day_old
ACAAAGTG_TGGGCGGT_ATGTAGAC_GTCACGTC	111	4728	0.0234772	1_day_old
ACAAAGTG_TGTTCCTG_TAACGATT_AATAACGT	166	5837	0.0284393	1_day_old
ACAAAGTG_TTAACTTG_AAGGAATC_CCATTGTG	286	9220	0.0310195	1_day_old
ACAAAGTG_TTCGTGCA_ATGTAGAC_TGCGAAGT	74	2032	0.0364173	1_day_old
ACCGGCTA_AAGGAGTA_AAGGAATC_AATTCTAA	202	9429	0.0214233	1_day_old
ACCGGCTA_AAGGAGTA_GTCCTTCG_TTACGCCG	228	9086	0.0250936	1_day_old
ACCGGCTA_AATCTACA_GTCCTTCG_GCGGTTAA	15	841	0.0178359	1_day_old
ACCGGCTA_ACCGGCCC_GTCCTTCG_TTACGCCG	342	11580	0.0295337	1_day_old
ACCGGCTA_AGAGATCT_TAACGATT_AATAACGT	5	183	0.0273224	1_day_old
ACCGGCTA_AGCCGTTC_GTCCTTCG_CGGCGACA	232	9591	0.0241893	1_day_old
ACCGGCTA_AGTCCGAG_TAACGATT_AATAACGT	146	6619	0.0220577	1_day_old
ACCGGCTA_CGCCAGAT_TAACGATT_GCGGTTAA	222	7131	0.0311317	1_day_old
ACCGGCTA_CGTACCAA_TAACGATT_CCATTGTG	121	3856	0.0313797	1_day_old
ACCGGCTA_CTTTAACA_AAGGAATC_AATAACGT	377	14536	0.0259356	1_day_old
ACCGGCTA_GCAAATTT_TAACGATT_CCATTGTG	117	4032	0.0290179	1_day_old
ACCGGCTA_GCATTAAG_ATGTAGAC_GTCACGTC	250	8530	0.0293083	1_day_old
ACCGGCTA_TACTGACC_TAACGATT_GCGGTTAA	96	3466	0.0276976	1_day_old
ACCGGCTA_TCCGAGTT_AAGGAATC_TGCGAAGT	213	5406	0.0394007	1_day_old
ACCGGCTA_TGATGAAA_GTCCTTCG_TTACGCCG	206	7298	0.0282269	1_day_old
ACCGGCTA_TGATTGTT_TAACGATT_GCGGTTAA	170	6803	0.024989	1_day_old
ACCGGCTA_TTCGTGCA_GTCCTTCG_AATAACGT	684	19583	0.0349283	1_day_old
ACCGGCTA_TTTCTAGC_TAACGATT_AATTCTAA	84	2294	0.0366173	1_day_old
AGGCAGAA_ACGCGCAG_GTCCTTCG_CCATTGTG	106	1314	0.0806697	1_day_old
AGGCAGAA_ACTTGTTG_TAACGATT_TGCGAAGT	53	1354	0.0391433	1_day_old
AGGCAGAA_AGGTTGCC_TAACGATT_CCATTGTG	87	2440	0.0356557	1_day_old
AGGCAGAA_ATCGAATG_TAACGATT_GCGGTTAA	67	2387	0.0280687	1_day_old
AGGCAGAA_ATGGTCAT_ATGTAGAC_AATAACGT	31	912	0.0339912	1_day_old
AGGCAGAA_ATTACCGT_AAGGAATC_CCATTGTG	232	7681	0.0302044	1_day_old
AGGCAGAA_ATTGGGTC_ATGTAGAC_AATAACGT	245	9021	0.0271589	1_day_old
AGGCAGAA_ATTGGGTC_TAACGATT_GTCACGTC	105	5060	0.020751	1_day_old
AGGCAGAA_CCAGTTTA_AAGGAATC_GCGGTTAA	110	4147	0.0265252	1_day_old
AGGCAGAA_CCAGTTTA_AAGGAATC_TTACGCCG	113	3728	0.0303112	1_day_old
AGGCAGAA_CCCTTGGA_GTCCTTCG_TTACGCCG	11	126	0.0873016	1_day_old
AGGCAGAA_CCTTATGT_GTCCTTCG_TTACGCCG	92	3176	0.0289673	1_day_old
AGGCAGAA_CGATAGGG_AAGGAATC_AATTCTAA	36	421	0.0855107	1_day_old
AGGCAGAA_CGATAGGG_ATGTAGAC_CGGCGACA	58	891	0.0650954	1_day_old
AGGCAGAA_CGCCAGAT_TAACGATT_CCATTGTG	45	1171	0.0384287	1_day_old
AGGCAGAA_CGGACTGC_AAGGAATC_TTACGCCG	59	2507	0.0235341	1_day_old
AGGCAGAA_CGGACTGC_ATGTAGAC_GTCACGTC	25	894	0.0279642	1_day_old
AGGCAGAA_CGTACCAA_GTCCTTCG_AATTCTAA	247	5771	0.0428002	1_day_old
AGGCAGAA_CGTAGACC_AAGGAATC_CCATTGTG	211	8478	0.0248879	1_day_old
AGGCAGAA_CTAAGCCT_GTCCTTCG_AATTCTAA	430	20982	0.0204938	1_day_old
AGGCAGAA_GAACTCGA_AAGGAATC_GCGGTTAA	98	5336	0.0183658	1_day_old
AGGCAGAA_GACGTGGC_AAGGAATC_GCGGTTAA	281	8044	0.0349329	1_day_old
AGGCAGAA_GATTCCCA_ATGTAGAC_GTCACGTC	29	609	0.047619	1_day_old
AGGCAGAA_GCAAATTT_AAGGAATC_CCATTGTG	172	4167	0.0412767	1_day_old
AGGCAGAA_GCAAATTT_TAACGATT_AATTCTAA	195	6407	0.0304355	1_day_old
AGGCAGAA_GCAGCCTC_GTCCTTCG_AATTCTAA	149	3039	0.0490293	1_day_old
AGGCAGAA_GCATTAAG_TAACGATT_CGGCGACA	20	872	0.0229358	1_day_old
AGGCAGAA_GGCACGGA_ATGTAGAC_AATTCTAA	4	395	0.0101266	1_day_old
AGGCAGAA_GGTGAAGG_AAGGAATC_TTACGCCG	22	226	0.0973451	1_day_old
AGGCAGAA_GTAAGGAG_ATGTAGAC_AATTCTAA	37	874	0.0423341	1_day_old
AGGCAGAA_GTCGGACT_AAGGAATC_CGGCGACA	223	5412	0.0412047	1_day_old
AGGCAGAA_GTCGGACT_ATGTAGAC_GTCACGTC	134	4658	0.0287677	1_day_old
AGGCAGAA_TACTGACC_AAGGAATC_AATTCTAA	232	7706	0.0301064	1_day_old
AGGCAGAA_TACTGACC_GTCCTTCG_TGCGAAGT	551	14091	0.039103	1_day_old
AGGCAGAA_TACTGACC_TAACGATT_CGGCGACA	46	1034	0.0444874	1_day_old
AGGCAGAA_TCTGGCGA_AAGGAATC_CGGCGACA	36	1078	0.0333952	1_day_old
AGGCAGAA_TGATTGTT_AAGGAATC_GCGGTTAA	345	10732	0.0321469	1_day_old
AGGCAGAA_TGTTCCTG_ATGTAGAC_GTCACGTC	39	1026	0.0380117	1_day_old
AGGCAGAA_TTGCCTAA_ATGTAGAC_GTCACGTC	153	5089	0.0300648	1_day_old
AGGTTGGG_AACATGAT_AAGGAATC_AATTCTAA	82	3630	0.0225895	1_day_old
AGGTTGGG_AAGGAGTA_GTCCTTCG_CCATTGTG	72	1998	0.036036	1_day_old
AGGTTGGG_ACATTCGT_ATGTAGAC_AATAACGT	52	1629	0.0319214	1_day_old
AGGTTGGG_ACGATAAC_TAACGATT_TGCGAAGT	42	1090	0.0385321	1_day_old
AGGTTGGG_ACTTAGAA_TAACGATT_AATTCTAA	110	4333	0.0253866	1_day_old
AGGTTGGG_AGAGTAGA_GTCCTTCG_CGGCGACA	58	1983	0.0292486	1_day_old
AGGTTGGG_AGAGTAGA_TAACGATT_TTACGCCG	81	2021	0.0400792	1_day_old
AGGTTGGG_AGGTTGCC_AAGGAATC_AATAACGT	30	1843	0.0162778	1_day_old
AGGTTGGG_ATCGAATG_ATGTAGAC_CGGCGACA	288	7299	0.0394575	1_day_old
AGGTTGGG_ATCGAATG_TAACGATT_CGGCGACA	86	3045	0.028243	1_day_old
AGGTTGGG_ATGGTCAT_AAGGAATC_AATAACGT	62	3216	0.0192786	1_day_old
AGGTTGGG_CCCTTGGA_TAACGATT_CCATTGTG	100	3951	0.02531	1_day_old
AGGTTGGG_CCTGCGGG_TAACGATT_TGCGAAGT	12	449	0.0267261	1_day_old
AGGTTGGG_CGATAGGG_AAGGAATC_TTACGCCG	241	9703	0.0248377	1_day_old
AGGTTGGG_CGGACTGC_GTCCTTCG_TGCGAAGT	114	3579	0.0318525	1_day_old
AGGTTGGG_CTAAGCCT_ATGTAGAC_GTCACGTC	259	8752	0.0295932	1_day_old
AGGTTGGG_CTAGAAGT_GTCCTTCG_TGCGAAGT	47	3180	0.0147799	1_day_old
AGGTTGGG_GAACTCGA_GTCCTTCG_AATAACGT	323	12199	0.0264776	1_day_old
AGGTTGGG_GAGACGTG_TAACGATT_TGCGAAGT	57	1444	0.0394737	1_day_old
AGGTTGGG_GCATTAAG_GTCCTTCG_GCGGTTAA	221	8453	0.0261446	1_day_old
AGGTTGGG_GGGCTTGG_TAACGATT_AATTCTAA	83	1725	0.0481159	1_day_old
AGGTTGGG_GGTTCAAT_AAGGAATC_TTACGCCG	401	18478	0.0217015	1_day_old
AGGTTGGG_GTAAGGAG_AAGGAATC_GTCACGTC	308	13357	0.0230591	1_day_old
AGGTTGGG_GTAAGGAG_AAGGAATC_TTACGCCG	52	1135	0.045815	1_day_old
AGGTTGGG_GTAAGGAG_TAACGATT_TTACGCCG	210	10348	0.0202938	1_day_old
AGGTTGGG_TAAGTTAC_AAGGAATC_CCATTGTG	169	5580	0.0302867	1_day_old
AGGTTGGG_TAGATCGC_AAGGAATC_GTCACGTC	295	11869	0.0248547	1_day_old
AGGTTGGG_TAGATCGC_TAACGATT_AATTCTAA	161	5024	0.0320462	1_day_old
AGGTTGGG_TCAAGAGC_GTCCTTCG_AATTCTAA	296	11829	0.0250232	1_day_old
AGGTTGGG_TCCATCAA_AAGGAATC_TGCGAAGT	72	3541	0.0203332	1_day_old
AGGTTGGG_TGCATACT_TAACGATT_CCATTGTG	65	2826	0.0230007	1_day_old
AGGTTGGG_TGGAAATC_TAACGATT_GCGGTTAA	61	2188	0.0278793	1_day_old
AGGTTGGG_TTTCTAGC_ATGTAGAC_GCGGTTAA	18	1024	0.0175781	1_day_old
AGTAGATT_AACATGAT_GTCCTTCG_TTACGCCG	433	15793	0.0274172	1_day_old
AGTAGATT_AAGGAGTA_ATGTAGAC_TGCGAAGT	457	17163	0.026627	1_day_old
AGTAGATT_AATCTACA_TAACGATT_TGCGAAGT	61	1954	0.031218	1_day_old
AGTAGATT_ACATTCGT_ATGTAGAC_CCATTGTG	80	2687	0.029773	1_day_old
AGTAGATT_ACGATAAC_GTCCTTCG_AATTCTAA	91	3878	0.0234657	1_day_old
AGTAGATT_ACTGCATA_TAACGATT_AATAACGT	233	5878	0.0396393	1_day_old
AGTAGATT_AGGTTGCC_TAACGATT_AATAACGT	165	5013	0.0329144	1_day_old
AGTAGATT_AGTCCGAG_TAACGATT_CCATTGTG	168	4054	0.0414406	1_day_old
AGTAGATT_CCTTATGT_GTCCTTCG_CGGCGACA	205	5393	0.0380122	1_day_old
AGTAGATT_CGGACTGC_GTCCTTCG_GCGGTTAA	91	5180	0.0175676	1_day_old
AGTAGATT_CGTACCAA_TAACGATT_CGGCGACA	347	11877	0.0292161	1_day_old
AGTAGATT_CGTAGACC_AAGGAATC_TTACGCCG	63	1994	0.0315948	1_day_old
AGTAGATT_CTAAGCCT_AAGGAATC_AATTCTAA	279	9701	0.0287599	1_day_old
AGTAGATT_CTAAGCCT_AAGGAATC_GCGGTTAA	236	6527	0.0361575	1_day_old
AGTAGATT_GAACTCGA_ATGTAGAC_GCGGTTAA	135	5017	0.0269085	1_day_old
AGTAGATT_GATCATTC_TAACGATT_CGGCGACA	144	4704	0.0306122	1_day_old
AGTAGATT_GCAGCCTC_AAGGAATC_CGGCGACA	130	5005	0.025974	1_day_old
AGTAGATT_GCAGCCTC_TAACGATT_GCGGTTAA	118	3980	0.0296482	1_day_old
AGTAGATT_GGCACGGA_GTCCTTCG_TGCGAAGT	190	5590	0.0339893	1_day_old
AGTAGATT_GGTGAAGG_AAGGAATC_GCGGTTAA	275	12132	0.0226673	1_day_old
AGTAGATT_GGTGAAGG_TAACGATT_CGGCGACA	341	10914	0.0312443	1_day_old
AGTAGATT_TAGATCGC_AAGGAATC_TGCGAAGT	164	4553	0.0360202	1_day_old
AGTAGATT_TCCGAGTT_GTCCTTCG_TTACGCCG	371	12392	0.0299387	1_day_old
AGTAGATT_TGATGAAA_AAGGAATC_AATTCTAA	706	21382	0.0330184	1_day_old
AGTAGATT_TGATGAAA_ATGTAGAC_CGGCGACA	247	9455	0.0261237	1_day_old
AGTAGATT_TGCATACT_TAACGATT_AATTCTAA	148	4009	0.0369169	1_day_old
AGTAGATT_TGGGCGGT_AAGGAATC_AATTCTAA	235	12545	0.0187326	1_day_old
AGTAGATT_TGTTCCTG_AAGGAATC_TGCGAAGT	115	5118	0.0224697	1_day_old
AGTAGATT_TTAACTTG_AAGGAATC_GCGGTTAA	102	5087	0.0200511	1_day_old
AGTAGATT_TTCGTGCA_AAGGAATC_GCGGTTAA	185	6490	0.0285054	1_day_old
AGTAGATT_TTGCCTAA_TAACGATT_CCATTGTG	154	4446	0.0346379	1_day_old
ATAAGTTA_AATCTACA_GTCCTTCG_CCATTGTG	132	4381	0.0301301	1_day_old
ATAAGTTA_ACTGCATA_TAACGATT_AATTCTAA	94	4032	0.0233135	1_day_old
ATAAGTTA_ACTTGTTG_ATGTAGAC_AATAACGT	262	9797	0.0267429	1_day_old
ATAAGTTA_ACTTGTTG_GTCCTTCG_CGGCGACA	166	6306	0.0263241	1_day_old
ATAAGTTA_AGAGTAGA_GTCCTTCG_CCATTGTG	39	1134	0.0343915	1_day_old
ATAAGTTA_AGCCGTTC_TAACGATT_AATTCTAA	147	4674	0.0314506	1_day_old
ATAAGTTA_ATCCAGGA_ATGTAGAC_GTCACGTC	404	13095	0.0308515	1_day_old
ATAAGTTA_ATTACCGT_AAGGAATC_CCATTGTG	174	7453	0.0233463	1_day_old
ATAAGTTA_ATTACCGT_ATGTAGAC_CGGCGACA	486	16118	0.0301526	1_day_old
ATAAGTTA_CAGCAACG_AAGGAATC_TGCGAAGT	94	5316	0.0176825	1_day_old
ATAAGTTA_CCTGCGGG_TAACGATT_AATTCTAA	66	1536	0.0429688	1_day_old
ATAAGTTA_CCTTATGT_TAACGATT_CGGCGACA	48	2296	0.0209059	1_day_old
ATAAGTTA_CGCCAGAT_ATGTAGAC_GTCACGTC	81	2881	0.0281152	1_day_old
ATAAGTTA_CGTACCAA_TAACGATT_AATTCTAA	18	874	0.020595	1_day_old
ATAAGTTA_CTAGAAGT_TAACGATT_TTACGCCG	129	3439	0.0375109	1_day_old
ATAAGTTA_GAACTCGA_TAACGATT_GCGGTTAA	174	4390	0.0396355	1_day_old
ATAAGTTA_GACGTGGC_ATGTAGAC_GTCACGTC	300	8889	0.0337496	1_day_old
ATAAGTTA_GAGACGTG_ATGTAGAC_AATAACGT	241	6472	0.0372373	1_day_old
ATAAGTTA_GATCATTC_GTCCTTCG_CCATTGTG	181	8467	0.0213771	1_day_old
ATAAGTTA_GATCATTC_TAACGATT_CCATTGTG	573	16873	0.0339596	1_day_old
ATAAGTTA_GCATTAAG_TAACGATT_TGCGAAGT	135	4218	0.0320057	1_day_old
ATAAGTTA_GTGTATCG_TAACGATT_AATTCTAA	54	1861	0.0290167	1_day_old
ATAAGTTA_TAACCAAG_TAACGATT_CCATTGTG	276	8335	0.0331134	1_day_old
ATAAGTTA_TAAGTTAC_GTCCTTCG_AATTCTAA	308	13096	0.0235186	1_day_old
ATAAGTTA_TACTGACC_ATGTAGAC_CCATTGTG	75	2673	0.0280584	1_day_old
ATAAGTTA_TAGATCGC_AAGGAATC_GCGGTTAA	348	11606	0.0299845	1_day_old
ATAAGTTA_TGCATACT_AAGGAATC_TGCGAAGT	121	4513	0.0268114	1_day_old
ATAAGTTA_TGGAAATC_ATGTAGAC_AATAACGT	517	14692	0.0351892	1_day_old
ATAAGTTA_TGGGCGGT_GTCCTTCG_AATAACGT	248	9636	0.0257368	1_day_old
ATAAGTTA_TTCGTGCA_ATGTAGAC_AATTCTAA	178	4570	0.0389497	1_day_old
ATCACTCG_ACCGGCCC_GTCCTTCG_CGGCGACA	327	9608	0.0340341	1_day_old
ATCACTCG_ACGATAAC_TAACGATT_GCGGTTAA	70	3304	0.0211864	1_day_old
ATCACTCG_ACTTGTTG_AAGGAATC_GCGGTTAA	90	3929	0.0229066	1_day_old
ATCACTCG_ACTTGTTG_TAACGATT_AATAACGT	155	7640	0.020288	1_day_old
ATCACTCG_ACTTGTTG_TAACGATT_GCGGTTAA	117	2895	0.0404145	1_day_old
ATCACTCG_ATGGTCAT_TAACGATT_TTACGCCG	47	653	0.0719755	1_day_old
ATCACTCG_ATTACCGT_GTCCTTCG_CGGCGACA	277	9846	0.0281333	1_day_old
ATCACTCG_CCTGCGGG_GTCCTTCG_AATAACGT	61	771	0.079118	1_day_old
ATCACTCG_CCTGCGGG_TAACGATT_TTACGCCG	49	952	0.0514706	1_day_old
ATCACTCG_CGCCAGAT_AAGGAATC_CCATTGTG	56	3092	0.0181113	1_day_old
ATCACTCG_CTAAGCCT_TAACGATT_GCGGTTAA	42	1254	0.0334928	1_day_old
ATCACTCG_CTAGAAGT_AAGGAATC_AATTCTAA	253	6720	0.0376488	1_day_old
ATCACTCG_CTAGAAGT_TAACGATT_TTACGCCG	31	429	0.0722611	1_day_old
ATCACTCG_CTTTAACA_TAACGATT_GTCACGTC	167	6837	0.0244259	1_day_old
ATCACTCG_GCATTAAG_AAGGAATC_TGCGAAGT	66	3434	0.0192196	1_day_old
ATCACTCG_GGTTCAAT_AAGGAATC_GCGGTTAA	41	2516	0.0162957	1_day_old
ATCACTCG_GTCGGACT_GTCCTTCG_TTACGCCG	277	9608	0.0288301	1_day_old
ATCACTCG_GTGTATCG_ATGTAGAC_TTACGCCG	44	1598	0.0275344	1_day_old
ATCACTCG_GTGTATCG_TAACGATT_TTACGCCG	42	555	0.0756757	1_day_old
ATCACTCG_TAACCAAG_AAGGAATC_CCATTGTG	890	22802	0.0390317	1_day_old
ATCACTCG_TATTTGCG_AAGGAATC_AATTCTAA	146	7840	0.0186224	1_day_old
ATCACTCG_TCAAGAGC_TAACGATT_AATTCTAA	177	5550	0.0318919	1_day_old
ATCACTCG_TCCGAGTT_GTCCTTCG_CGGCGACA	95	4859	0.0195513	1_day_old
ATCACTCG_TGATGAAA_TAACGATT_TTACGCCG	13	153	0.0849673	1_day_old
ATCACTCG_TGCATACT_TAACGATT_CGGCGACA	89	3492	0.0254868	1_day_old
ATCACTCG_TTAACTTG_ATGTAGAC_AATAACGT	193	6475	0.0298069	1_day_old
ATCACTCG_TTAACTTG_GTCCTTCG_AATTCTAA	142	6709	0.0211656	1_day_old
ATGATGAT_AACATGAT_GTCCTTCG_TTACGCCG	155	3836	0.0404067	1_day_old
ATGATGAT_ACATTCGT_ATGTAGAC_GTCACGTC	36	1486	0.0242261	1_day_old
ATGATGAT_ACATTCGT_TAACGATT_AATTCTAA	14	553	0.0253165	1_day_old
ATGATGAT_ACGCGCAG_AAGGAATC_GCGGTTAA	62	2013	0.0307998	1_day_old
ATGATGAT_ACTGCATA_TAACGATT_GTCACGTC	264	8743	0.0301956	1_day_old
ATGATGAT_ACTTAGAA_AAGGAATC_TGCGAAGT	229	7738	0.0295942	1_day_old
ATGATGAT_ACTTAGAA_TAACGATT_GTCACGTC	134	4717	0.0284079	1_day_old
ATGATGAT_AGAGATCT_AAGGAATC_AATAACGT	14	200	0.07	1_day_old
ATGATGAT_AGTCCGAG_AAGGAATC_AATAACGT	49	528	0.092803	1_day_old
ATGATGAT_ATCCAGGA_AAGGAATC_AATAACGT	14	200	0.07	1_day_old
ATGATGAT_ATTACCGT_AAGGAATC_GCGGTTAA	399	14781	0.0269941	1_day_old
ATGATGAT_CTAAGCCT_GTCCTTCG_TTACGCCG	10	870	0.0114943	1_day_old
ATGATGAT_CTCTCTAT_ATGTAGAC_CCATTGTG	41	1364	0.0300587	1_day_old
ATGATGAT_GAACTCGA_TAACGATT_CGGCGACA	61	2022	0.0301682	1_day_old
ATGATGAT_GAGACGTG_GTCCTTCG_AATAACGT	19	617	0.0307942	1_day_old
ATGATGAT_GCATTAAG_TAACGATT_CGGCGACA	34	2255	0.0150776	1_day_old
ATGATGAT_GGCACGGA_GTCCTTCG_GCGGTTAA	289	9860	0.0293103	1_day_old
ATGATGAT_GGCACGGA_TAACGATT_AATTCTAA	1175	27660	0.0424801	1_day_old
ATGATGAT_GGCACGGA_TAACGATT_GCGGTTAA	366	16159	0.0226499	1_day_old
ATGATGAT_GGTGAAGG_AAGGAATC_GCGGTTAA	7	496	0.0141129	1_day_old
ATGATGAT_GTCGGACT_AAGGAATC_GCGGTTAA	27	830	0.0325301	1_day_old
ATGATGAT_GTCGGACT_AAGGAATC_TTACGCCG	24	1112	0.0215827	1_day_old
ATGATGAT_GTGTATCG_AAGGAATC_TTACGCCG	118	3657	0.0322669	1_day_old
ATGATGAT_TAACCAAG_ATGTAGAC_AATTCTAA	70	1751	0.0399772	1_day_old
ATGATGAT_TATCCTCT_GTCCTTCG_TGCGAAGT	121	4361	0.0277459	1_day_old
ATGATGAT_TCTGGCGA_AAGGAATC_TGCGAAGT	19	151	0.125828	1_day_old
ATGATGAT_TGGAAATC_AAGGAATC_GTCACGTC	346	10235	0.0338056	1_day_old
ATGATGAT_TTTCTAGC_ATGTAGAC_AATAACGT	214	8907	0.024026	1_day_old
ATGATGAT_TTTCTAGC_ATGTAGAC_GTCACGTC	292	10900	0.026789	1_day_old
ATGGGAAC_AACATGAT_GTCCTTCG_TTACGCCG	397	12583	0.0315505	1_day_old
ATGGGAAC_AATCTACA_GTCCTTCG_CGGCGACA	256	8958	0.0285778	1_day_old
ATGGGAAC_ACATTCGT_GTCCTTCG_TGCGAAGT	133	4888	0.0272095	1_day_old
ATGGGAAC_ACCGGCCC_TAACGATT_GCGGTTAA	39	1562	0.024968	1_day_old
ATGGGAAC_ACGCGCAG_GTCCTTCG_AATAACGT	230	11289	0.0203738	1_day_old
ATGGGAAC_AGAGTAGA_AAGGAATC_TTACGCCG	136	4568	0.0297723	1_day_old
ATGGGAAC_AGGTTGCC_TAACGATT_CCATTGTG	199	5436	0.0366078	1_day_old
ATGGGAAC_ATCCAGGA_AAGGAATC_GTCACGTC	143	4894	0.0292195	1_day_old
ATGGGAAC_ATCGAATG_AAGGAATC_AATTCTAA	76	4990	0.0152305	1_day_old
ATGGGAAC_ATCGAATG_GTCCTTCG_AATAACGT	628	21871	0.0287138	1_day_old
ATGGGAAC_ATTACCGT_AAGGAATC_CGGCGACA	318	11726	0.0271192	1_day_old
ATGGGAAC_CCAGTTTA_AAGGAATC_AATTCTAA	521	14727	0.0353772	1_day_old
ATGGGAAC_CCAGTTTA_ATGTAGAC_CGGCGACA	61	1876	0.032516	1_day_old
ATGGGAAC_CGATAGGG_GTCCTTCG_CGGCGACA	18	1185	0.0151899	1_day_old
ATGGGAAC_CGGACTGC_GTCCTTCG_AATAACGT	276	11274	0.0244811	1_day_old
ATGGGAAC_CTAAGCCT_GTCCTTCG_CGGCGACA	199	7988	0.0249124	1_day_old
ATGGGAAC_CTAAGCCT_TAACGATT_GTCACGTC	87	3583	0.0242813	1_day_old
ATGGGAAC_CTCTCTAT_AAGGAATC_AATAACGT	411	19626	0.0209416	1_day_old
ATGGGAAC_CTCTCTAT_TAACGATT_AATAACGT	203	6950	0.0292086	1_day_old
ATGGGAAC_GAGACGTG_AAGGAATC_GCGGTTAA	225	6469	0.0347813	1_day_old
ATGGGAAC_GATCATTC_AAGGAATC_CGGCGACA	300	12285	0.02442	1_day_old
ATGGGAAC_GTGTATCG_AAGGAATC_AATTCTAA	168	6060	0.0277228	1_day_old
ATGGGAAC_GTGTATCG_AAGGAATC_GTCACGTC	242	8151	0.0296896	1_day_old
ATGGGAAC_TCACATGG_GTCCTTCG_GCGGTTAA	95	5172	0.0183681	1_day_old
ATGGGAAC_TGATGAAA_GTCCTTCG_CGGCGACA	188	5705	0.0329535	1_day_old
ATGGGAAC_TGATTGTT_AAGGAATC_CGGCGACA	367	10927	0.0335865	1_day_old
ATGGGAAC_TGGAAATC_AAGGAATC_TTACGCCG	249	6194	0.0402002	1_day_old
ATGGGAAC_TTGCCTAA_AAGGAATC_TGCGAAGT	162	7080	0.0228814	1_day_old
ATGGGAAC_TTGCCTAA_TAACGATT_AATAACGT	353	9008	0.0391874	1_day_old
ATTGCCGG_ACGATAAC_ATGTAGAC_AATAACGT	46	1191	0.038623	1_day_old
ATTGCCGG_AGCCGTTC_GTCCTTCG_GTCACGTC	200	7298	0.0274048	1_day_old
ATTGCCGG_ATTACCGT_GTCCTTCG_TTACGCCG	124	3118	0.0397691	1_day_old
ATTGCCGG_ATTGGGTC_TAACGATT_AATAACGT	158	4540	0.0348018	1_day_old
ATTGCCGG_CAGCAACG_AAGGAATC_CGGCGACA	161	5859	0.0274791	1_day_old
ATTGCCGG_CAGCAACG_TAACGATT_GCGGTTAA	68	1882	0.0361318	1_day_old
ATTGCCGG_CCTGCGGG_AAGGAATC_AATTCTAA	281	7776	0.0361368	1_day_old
ATTGCCGG_CCTGCGGG_AAGGAATC_CCATTGTG	186	4551	0.0408701	1_day_old
ATTGCCGG_CGGACTGC_TAACGATT_GTCACGTC	113	3691	0.030615	1_day_old
ATTGCCGG_CTTTAACA_AAGGAATC_AATAACGT	500	16960	0.0294811	1_day_old
ATTGCCGG_CTTTAACA_TAACGATT_AATTCTAA	112	3376	0.0331754	1_day_old
ATTGCCGG_GGGCTTGG_AAGGAATC_TTACGCCG	159	3400	0.0467647	1_day_old
ATTGCCGG_TAAGTTAC_GTCCTTCG_TTACGCCG	136	3887	0.0349884	1_day_old
ATTGCCGG_TCCATCAA_AAGGAATC_GTCACGTC	271	8771	0.0308973	1_day_old
ATTGCCGG_TGATGAAA_AAGGAATC_TTACGCCG	13	464	0.0280172	1_day_old
ATTGCCGG_TGGAAATC_GTCCTTCG_GTCACGTC	131	4486	0.029202	1_day_old
ATTGCCGG_TGTTCCTG_GTCCTTCG_AATTCTAA	469	12683	0.0369786	1_day_old
ATTGCCGG_TTAACTTG_AAGGAATC_GTCACGTC	264	11372	0.0232149	1_day_old
ATTGCCGG_TTAACTTG_ATGTAGAC_AATTCTAA	229	7882	0.0290535	1_day_old
ATTGCCGG_TTAACTTG_TAACGATT_AATTCTAA	1211	31806	0.0380746	1_day_old
CAAGAATT_AATCTACA_AAGGAATC_CCATTGTG	181	2538	0.071316	1_day_old
CAAGAATT_AATCTACA_ATGTAGAC_CCATTGTG	22	660	0.0333333	1_day_old
CAAGAATT_ACGCGCAG_TAACGATT_CCATTGTG	235	7234	0.0324855	1_day_old
CAAGAATT_ACTTAGAA_ATGTAGAC_CCATTGTG	255	10705	0.0238206	1_day_old
CAAGAATT_AGAGTAGA_AAGGAATC_CCATTGTG	19	116	0.163793	1_day_old
CAAGAATT_AGAGTAGA_AAGGAATC_GTCACGTC	181	6293	0.0287621	1_day_old
CAAGAATT_AGCCGTTC_AAGGAATC_CCATTGTG	50	1349	0.0370645	1_day_old
CAAGAATT_AGCCGTTC_GTCCTTCG_GCGGTTAA	11	147	0.0748299	1_day_old
CAAGAATT_AGCCGTTC_TAACGATT_GTCACGTC	115	4399	0.0261423	1_day_old
CAAGAATT_AGTCCGAG_AAGGAATC_CCATTGTG	34	404	0.0841584	1_day_old
CAAGAATT_ATCCAGGA_AAGGAATC_CCATTGTG	47	537	0.0875233	1_day_old
CAAGAATT_ATCCAGGA_ATGTAGAC_CCATTGTG	4	130	0.0307692	1_day_old
CAAGAATT_ATCCAGGA_GTCCTTCG_CGGCGACA	154	7342	0.0209752	1_day_old
CAAGAATT_CAGCAACG_AAGGAATC_CCATTGTG	19	163	0.116564	1_day_old
CAAGAATT_CCTGCGGG_AAGGAATC_CCATTGTG	28	244	0.114754	1_day_old
CAAGAATT_CGATAGGG_AAGGAATC_CCATTGTG	14	162	0.0864198	1_day_old
CAAGAATT_CGCCAGAT_AAGGAATC_TGCGAAGT	83	2300	0.036087	1_day_old
CAAGAATT_CTAAGCCT_AAGGAATC_AATTCTAA	154	4636	0.0332183	1_day_old
CAAGAATT_GAACTCGA_AAGGAATC_GCGGTTAA	165	4960	0.0332661	1_day_old
CAAGAATT_GAGACGTG_GTCCTTCG_GCGGTTAA	151	3767	0.0400849	1_day_old
CAAGAATT_GATCATTC_ATGTAGAC_AATAACGT	249	8158	0.0305222	1_day_old
CAAGAATT_GATCATTC_ATGTAGAC_AATTCTAA	99	3338	0.0296585	1_day_old
CAAGAATT_GCAGCCTC_AAGGAATC_CCATTGTG	34	321	0.105919	1_day_old
CAAGAATT_GGGCTTGG_AAGGAATC_TGCGAAGT	184	5703	0.0322637	1_day_old
CAAGAATT_GGTGAAGG_AAGGAATC_AATTCTAA	162	8694	0.0186335	1_day_old
CAAGAATT_GGTTCAAT_AAGGAATC_CCATTGTG	12	162	0.0740741	1_day_old
CAAGAATT_GGTTCAAT_ATGTAGAC_GCGGTTAA	180	5365	0.0335508	1_day_old
CAAGAATT_GTCGGACT_AAGGAATC_CCATTGTG	10	143	0.0699301	1_day_old
CAAGAATT_GTGTATCG_AAGGAATC_CCATTGTG	18	204	0.0882353	1_day_old
CAAGAATT_GTGTATCG_GTCCTTCG_AATAACGT	192	5704	0.0336606	1_day_old
CAAGAATT_TAACCAAG_GTCCTTCG_AATTCTAA	179	4452	0.0402066	1_day_old
CAAGAATT_TACTGACC_AAGGAATC_CCATTGTG	37	278	0.133094	1_day_old
CAAGAATT_TCCGAGTT_AAGGAATC_CCATTGTG	17	180	0.0944444	1_day_old
CAAGAATT_TCTGGCGA_TAACGATT_GCGGTTAA	158	5264	0.0300152	1_day_old
CAAGAATT_TGATGAAA_TAACGATT_TGCGAAGT	87	2969	0.0293028	1_day_old
CAAGAATT_TGCATACT_AAGGAATC_CCATTGTG	35	295	0.118644	1_day_old
CAAGAATT_TGGAAATC_TAACGATT_CCATTGTG	136	3616	0.0376106	1_day_old
CAAGAATT_TGGAAATC_TAACGATT_GTCACGTC	106	2783	0.0380884	1_day_old
CAAGAATT_TGGGCGGT_ATGTAGAC_AATAACGT	165	4224	0.0390625	1_day_old
CAAGAATT_TGTTCCTG_AAGGAATC_CCATTGTG	32	276	0.115942	1_day_old
CAAGAATT_TTCGTGCA_ATGTAGAC_AATAACGT	121	4629	0.0261396	1_day_old
CAATCTTA_AACATGAT_ATGTAGAC_AATAACGT	10	113	0.0884956	1_day_old
CAATCTTA_AACATGAT_TAACGATT_AATTCTAA	89	2711	0.0328292	1_day_old
CAATCTTA_ACCGGCCC_GTCCTTCG_AATAACGT	358	13766	0.0260061	1_day_old
CAATCTTA_ACGATAAC_ATGTAGAC_CGGCGACA	149	6862	0.0217138	1_day_old
CAATCTTA_ACGCGCAG_GTCCTTCG_CCATTGTG	10	132	0.0757576	1_day_old
CAATCTTA_ACTTAGAA_AAGGAATC_GTCACGTC	65	1029	0.0631681	1_day_old
CAATCTTA_ACTTAGAA_AAGGAATC_TTACGCCG	186	5895	0.0315522	1_day_old
CAATCTTA_AGAGTAGA_ATGTAGAC_CGGCGACA	255	7421	0.0343619	1_day_old
CAATCTTA_AGCCGTTC_TAACGATT_GCGGTTAA	145	4385	0.0330673	1_day_old
CAATCTTA_AGCCGTTC_TAACGATT_GTCACGTC	125	4355	0.0287026	1_day_old
CAATCTTA_AGTCCGAG_ATGTAGAC_AATTCTAA	215	6470	0.0332303	1_day_old
CAATCTTA_ATTACCGT_AAGGAATC_TTACGCCG	107	3330	0.0321321	1_day_old
CAATCTTA_CCAGTTTA_AAGGAATC_TGCGAAGT	20	342	0.0584795	1_day_old
CAATCTTA_CCCTTGGA_GTCCTTCG_TTACGCCG	37	442	0.0837104	1_day_old
CAATCTTA_CCTGCGGG_GTCCTTCG_AATTCTAA	48	1681	0.0285544	1_day_old
CAATCTTA_CGATAGGG_TAACGATT_AATTCTAA	62	2518	0.0246227	1_day_old
CAATCTTA_CGCCAGAT_TAACGATT_CCATTGTG	162	4017	0.0403286	1_day_old
CAATCTTA_CGGACTGC_AAGGAATC_TGCGAAGT	356	10975	0.0324374	1_day_old
CAATCTTA_CGTACCAA_TAACGATT_AATAACGT	300	9697	0.0309374	1_day_old
CAATCTTA_CTAAGCCT_AAGGAATC_GTCACGTC	39	1065	0.0366197	1_day_old
CAATCTTA_CTCTCTAT_GTCCTTCG_TGCGAAGT	60	3259	0.0184106	1_day_old
CAATCTTA_GAACTCGA_AAGGAATC_GCGGTTAA	151	4007	0.0376841	1_day_old
CAATCTTA_GAGACGTG_GTCCTTCG_TGCGAAGT	76	1601	0.0474703	1_day_old
CAATCTTA_GATTCCCA_AAGGAATC_AATAACGT	127	3292	0.0385784	1_day_old
CAATCTTA_GCATTAAG_TAACGATT_CCATTGTG	142	3705	0.0383266	1_day_old
CAATCTTA_GGTGAAGG_AAGGAATC_TTACGCCG	23	457	0.0503282	1_day_old
CAATCTTA_GTCGGACT_GTCCTTCG_GTCACGTC	342	9155	0.0373566	1_day_old
CAATCTTA_TAACCAAG_GTCCTTCG_AATAACGT	147	5622	0.0261473	1_day_old
CAATCTTA_TAACCAAG_GTCCTTCG_CCATTGTG	176	4941	0.0356203	1_day_old
CAATCTTA_TAAGTTAC_ATGTAGAC_GTCACGTC	229	9013	0.0254077	1_day_old
CAATCTTA_TAAGTTAC_GTCCTTCG_TGCGAAGT	74	3271	0.0226231	1_day_old
CAATCTTA_TATTTGCG_AAGGAATC_TTACGCCG	21	492	0.0426829	1_day_old
CAATCTTA_TATTTGCG_TAACGATT_AATAACGT	187	3922	0.0476798	1_day_old
CAATCTTA_TCCGAGTT_ATGTAGAC_TGCGAAGT	150	5166	0.029036	1_day_old
CAATCTTA_TCTGGCGA_ATGTAGAC_TGCGAAGT	63	1595	0.0394984	1_day_old
CAATCTTA_TGCATACT_AAGGAATC_TTACGCCG	295	12289	0.0240052	1_day_old
CAATCTTA_TGGGCGGT_GTCCTTCG_AATAACGT	329	11749	0.0280024	1_day_old
CAATCTTA_TGTTCCTG_TAACGATT_AATAACGT	221	5522	0.0400217	1_day_old
CAATCTTA_TTCGTGCA_TAACGATT_GCGGTTAA	73	1850	0.0394595	1_day_old
CAATCTTA_TTGCCTAA_AAGGAATC_CCATTGTG	182	4646	0.0391735	1_day_old
CAATCTTA_TTGCCTAA_TAACGATT_GTCACGTC	116	2984	0.038874	1_day_old
CAGAGAGG_AACATGAT_AAGGAATC_GCGGTTAA	16	291	0.0549828	1_day_old
CAGAGAGG_AACATGAT_ATGTAGAC_AATAACGT	945	26199	0.0360701	1_day_old
CAGAGAGG_AACATGAT_TAACGATT_CCATTGTG	57	3599	0.0158377	1_day_old
CAGAGAGG_AATCTACA_AAGGAATC_TTACGCCG	206	9966	0.0206703	1_day_old
CAGAGAGG_ACATTCGT_TAACGATT_TTACGCCG	386	10362	0.0372515	1_day_old
CAGAGAGG_ACCGGCCC_GTCCTTCG_TTACGCCG	432	18255	0.0236647	1_day_old
CAGAGAGG_ACGATAAC_GTCCTTCG_GTCACGTC	228	9151	0.0249153	1_day_old
CAGAGAGG_ACGCGCAG_TAACGATT_CGGCGACA	109	3251	0.0335281	1_day_old
CAGAGAGG_ACTGCATA_GTCCTTCG_TGCGAAGT	134	3138	0.0427024	1_day_old
CAGAGAGG_ACTTAGAA_GTCCTTCG_AATTCTAA	304	10803	0.0281403	1_day_old
CAGAGAGG_ACTTGTTG_GTCCTTCG_CCATTGTG	367	14429	0.0254349	1_day_old
CAGAGAGG_ACTTGTTG_GTCCTTCG_CGGCGACA	122	6374	0.0191403	1_day_old
CAGAGAGG_AGGTTGCC_GTCCTTCG_CCATTGTG	264	9751	0.0270741	1_day_old
CAGAGAGG_ATCCAGGA_AAGGAATC_AATTCTAA	174	7039	0.0247194	1_day_old
CAGAGAGG_ATTACCGT_AAGGAATC_TTACGCCG	8	286	0.027972	1_day_old
CAGAGAGG_ATTACCGT_ATGTAGAC_AATAACGT	17	161	0.10559	1_day_old
CAGAGAGG_ATTGGGTC_GTCCTTCG_GCGGTTAA	160	8041	0.019898	1_day_old
CAGAGAGG_CAGCAACG_AAGGAATC_TTACGCCG	832	25341	0.0328322	1_day_old
CAGAGAGG_CCCTTGGA_TAACGATT_GTCACGTC	65	2829	0.0229763	1_day_old
CAGAGAGG_CGATAGGG_GTCCTTCG_TGCGAAGT	88	3240	0.0271605	1_day_old
CAGAGAGG_CGCCAGAT_GTCCTTCG_TTACGCCG	183	8179	0.0223744	1_day_old
CAGAGAGG_CGGACTGC_AAGGAATC_GCGGTTAA	71	3302	0.0215021	1_day_old
CAGAGAGG_CGGACTGC_GTCCTTCG_CGGCGACA	61	1517	0.0402109	1_day_old
CAGAGAGG_CGGACTGC_GTCCTTCG_TGCGAAGT	25	1459	0.017135	1_day_old
CAGAGAGG_CGTACCAA_GTCCTTCG_AATAACGT	611	22148	0.0275871	1_day_old
CAGAGAGG_CGTAGACC_TAACGATT_CGGCGACA	82	3444	0.0238095	1_day_old
CAGAGAGG_CTAAGCCT_GTCCTTCG_GCGGTTAA	198	7697	0.0257243	1_day_old
CAGAGAGG_CTAGAAGT_ATGTAGAC_AATAACGT	150	4290	0.034965	1_day_old
CAGAGAGG_CTAGAAGT_GTCCTTCG_TGCGAAGT	56	1439	0.0389159	1_day_old
CAGAGAGG_GACGTGGC_GTCCTTCG_CGGCGACA	162	6068	0.0266974	1_day_old
CAGAGAGG_GATTCCCA_AAGGAATC_TTACGCCG	128	4905	0.0260958	1_day_old
CAGAGAGG_GCAGCCTC_ATGTAGAC_CGGCGACA	8	145	0.0551724	1_day_old
CAGAGAGG_GGGCTTGG_AAGGAATC_CGGCGACA	65	1468	0.0442779	1_day_old
CAGAGAGG_GGTGAAGG_AAGGAATC_TTACGCCG	7	133	0.0526316	1_day_old
CAGAGAGG_GGTGAAGG_GTCCTTCG_AATAACGT	121	5609	0.0215725	1_day_old
CAGAGAGG_GGTGAAGG_TAACGATT_AATTCTAA	177	5278	0.0335354	1_day_old
CAGAGAGG_GTAAGGAG_ATGTAGAC_AATAACGT	231	7226	0.0319679	1_day_old
CAGAGAGG_TAACCAAG_GTCCTTCG_TTACGCCG	342	14449	0.0236695	1_day_old
CAGAGAGG_TAAGTTAC_TAACGATT_CGGCGACA	66	2767	0.0238525	1_day_old
CAGAGAGG_TACTGACC_AAGGAATC_AATAACGT	269	6628	0.0405854	1_day_old
CAGAGAGG_TAGATCGC_ATGTAGAC_AATAACGT	19	303	0.0627063	1_day_old
CAGAGAGG_TATTTGCG_TAACGATT_CCATTGTG	92	2073	0.0443801	1_day_old
CAGAGAGG_TCAAGAGC_ATGTAGAC_CGGCGACA	1078	41428	0.026021	1_day_old
CAGAGAGG_TCTGGCGA_GTCCTTCG_CCATTGTG	200	8691	0.0230123	1_day_old
CAGAGAGG_TGATTGTT_AAGGAATC_CGGCGACA	76	2365	0.0321353	1_day_old
CAGAGAGG_TGATTGTT_GTCCTTCG_AATAACGT	18	151	0.119205	1_day_old
CAGAGAGG_TGGAAATC_AAGGAATC_CCATTGTG	248	7852	0.0315843	1_day_old
CAGAGAGG_TTCGTGCA_ATGTAGAC_CCATTGTG	146	5386	0.0271073	1_day_old
CAGAGAGG_TTGCCTAA_ATGTAGAC_TTACGCCG	320	12879	0.0248466	1_day_old
CATCCTGT_AGAGTAGA_ATGTAGAC_AATTCTAA	129	4869	0.0264941	1_day_old
CATCCTGT_AGCCGTTC_AAGGAATC_GTCACGTC	220	8094	0.0271806	1_day_old
CATCCTGT_CAGCAACG_GTCCTTCG_TGCGAAGT	119	3363	0.0353851	1_day_old
CATCCTGT_CAGCAACG_TAACGATT_AATAACGT	116	2753	0.0421359	1_day_old
CATCCTGT_CCAGTTTA_ATGTAGAC_TTACGCCG	139	4046	0.0343549	1_day_old
CATCCTGT_CGTAGACC_AAGGAATC_AATTCTAA	166	6511	0.0254953	1_day_old
CATCCTGT_CTTTAACA_GTCCTTCG_TTACGCCG	455	16920	0.0268913	1_day_old
CATCCTGT_GAGACGTG_ATGTAGAC_CCATTGTG	816	15613	0.0522641	1_day_old
CATCCTGT_GCAGCCTC_ATGTAGAC_AATTCTAA	244	7206	0.0338607	1_day_old
CATCCTGT_GGCACGGA_AAGGAATC_CCATTGTG	140	7291	0.0192018	1_day_old
CATCCTGT_GGTTCAAT_GTCCTTCG_CGGCGACA	178	5286	0.0336739	1_day_old
CATCCTGT_TAAGTTAC_ATGTAGAC_GTCACGTC	175	5466	0.0320161	1_day_old
CATCCTGT_TAGATCGC_TAACGATT_GTCACGTC	108	3285	0.0328767	1_day_old
CATCCTGT_TATCCTCT_TAACGATT_GTCACGTC	40	1358	0.0294551	1_day_old
CATCCTGT_TCACATGG_GTCCTTCG_CCATTGTG	222	5771	0.0384682	1_day_old
CATCCTGT_TCCGAGTT_ATGTAGAC_AATAACGT	226	7110	0.0317862	1_day_old
CATCCTGT_TCCGAGTT_TAACGATT_AATTCTAA	72	2620	0.0274809	1_day_old
CATCCTGT_TGATGAAA_GTCCTTCG_CGGCGACA	80	2609	0.0306631	1_day_old
CATCCTGT_TGTTCCTG_AAGGAATC_TGCGAAGT	149	5265	0.0283001	1_day_old
CATCCTGT_TTTCTAGC_TAACGATT_TTACGCCG	386	11262	0.0342746	1_day_old
CATCGACC_AAGGAGTA_GTCCTTCG_AATTCTAA	870	28661	0.0303548	1_day_old
CATCGACC_ACCGGCCC_GTCCTTCG_CGGCGACA	190	6658	0.0285371	1_day_old
CATCGACC_ACGCGCAG_ATGTAGAC_GCGGTTAA	164	5879	0.0278959	1_day_old
CATCGACC_ACTGCATA_AAGGAATC_CGGCGACA	84	2291	0.0366652	1_day_old
CATCGACC_ACTTAGAA_TAACGATT_CGGCGACA	94	3328	0.0282452	1_day_old
CATCGACC_ATTACCGT_AAGGAATC_TTACGCCG	41	705	0.058156	1_day_old
CATCGACC_ATTACCGT_GTCCTTCG_AATTCTAA	455	18143	0.0250785	1_day_old
CATCGACC_ATTGGGTC_GTCCTTCG_TTACGCCG	40	399	0.100251	1_day_old
CATCGACC_CCAGTTTA_AAGGAATC_TGCGAAGT	5	178	0.0280899	1_day_old
CATCGACC_CCAGTTTA_GTCCTTCG_GTCACGTC	219	12271	0.017847	1_day_old
CATCGACC_CCCTTGGA_GTCCTTCG_GCGGTTAA	181	8772	0.0206338	1_day_old
CATCGACC_CCCTTGGA_GTCCTTCG_GTCACGTC	397	12249	0.0324108	1_day_old
CATCGACC_CCCTTGGA_GTCCTTCG_TTACGCCG	78	1017	0.0766962	1_day_old
CATCGACC_CGCCAGAT_AAGGAATC_CCATTGTG	167	7731	0.0216013	1_day_old
CATCGACC_CGCCAGAT_TAACGATT_CCATTGTG	117	3215	0.0363919	1_day_old
CATCGACC_CGGACTGC_TAACGATT_TTACGCCG	208	6968	0.0298507	1_day_old
CATCGACC_CTAAGCCT_AAGGAATC_GTCACGTC	27	722	0.0373961	1_day_old
CATCGACC_CTCTCTAT_AAGGAATC_TTACGCCG	104	3425	0.030365	1_day_old
CATCGACC_CTTTAACA_TAACGATT_AATAACGT	250	6689	0.0373748	1_day_old
CATCGACC_GAACTCGA_GTCCTTCG_CGGCGACA	300	9342	0.032113	1_day_old
CATCGACC_GAACTCGA_TAACGATT_AATTCTAA	104	3178	0.032725	1_day_old
CATCGACC_GAACTCGA_TAACGATT_GTCACGTC	102	2576	0.0395963	1_day_old
CATCGACC_GACGTGGC_AAGGAATC_CGGCGACA	132	6237	0.021164	1_day_old
CATCGACC_GACGTGGC_GTCCTTCG_CGGCGACA	130	5757	0.0225812	1_day_old
CATCGACC_GAGACGTG_ATGTAGAC_AATAACGT	349	11337	0.0307842	1_day_old
CATCGACC_GAGACGTG_TAACGATT_AATTCTAA	130	4346	0.0299126	1_day_old
CATCGACC_GCATTAAG_GTCCTTCG_TTACGCCG	195	6147	0.0317228	1_day_old
CATCGACC_GCATTAAG_TAACGATT_AATTCTAA	87	2635	0.0330171	1_day_old
CATCGACC_GGCACGGA_AAGGAATC_GCGGTTAA	19	296	0.0641892	1_day_old
CATCGACC_GGCACGGA_TAACGATT_AATAACGT	168	4075	0.041227	1_day_old
CATCGACC_GGGCTTGG_AAGGAATC_TTACGCCG	416	12408	0.0335268	1_day_old
CATCGACC_GTAAGGAG_ATGTAGAC_AATTCTAA	588	17092	0.0344021	1_day_old
CATCGACC_TAAGTTAC_GTCCTTCG_AATTCTAA	775	23220	0.0333764	1_day_old
CATCGACC_TACTGACC_AAGGAATC_GTCACGTC	201	6416	0.0313279	1_day_old
CATCGACC_TACTGACC_TAACGATT_GCGGTTAA	460	17327	0.0265482	1_day_old
CATCGACC_TAGATCGC_AAGGAATC_TTACGCCG	18	376	0.0478723	1_day_old
CATCGACC_TATCCTCT_TAACGATT_AATTCTAA	101	5086	0.0198584	1_day_old
CATCGACC_TATTTGCG_ATGTAGAC_CCATTGTG	348	8830	0.0394111	1_day_old
CATCGACC_TCAAGAGC_AAGGAATC_CCATTGTG	55	3480	0.0158046	1_day_old
CATCGACC_TCCATCAA_GTCCTTCG_CCATTGTG	215	8399	0.0255983	1_day_old
CATCGACC_TCCGAGTT_GTCCTTCG_TTACGCCG	412	16441	0.0250593	1_day_old
CATCGACC_TCTGGCGA_GTCCTTCG_GCGGTTAA	310	8779	0.0353115	1_day_old
CATCGACC_TGATGAAA_TAACGATT_CGGCGACA	66	2574	0.025641	1_day_old
CATCGACC_TGCATACT_TAACGATT_CCATTGTG	17	953	0.0178384	1_day_old
CATCGACC_TGTTCCTG_AAGGAATC_CGGCGACA	50	3075	0.0162602	1_day_old
CCAAATAA_ACCGGCCC_AAGGAATC_TGCGAAGT	43	1157	0.0371651	1_day_old
CCAAATAA_ACGATAAC_ATGTAGAC_GCGGTTAA	119	5361	0.0221974	1_day_old
CCAAATAA_ACTGCATA_TAACGATT_AATTCTAA	152	3641	0.0417468	1_day_old
CCAAATAA_AGAGATCT_AAGGAATC_AATTCTAA	10	145	0.0689655	1_day_old
CCAAATAA_AGCCGTTC_AAGGAATC_TGCGAAGT	108	6763	0.0159692	1_day_old
CCAAATAA_AGCCGTTC_GTCCTTCG_TGCGAAGT	762	28865	0.0263988	1_day_old
CCAAATAA_AGGTTGCC_AAGGAATC_GCGGTTAA	94	3619	0.025974	1_day_old
CCAAATAA_AGTCCGAG_AAGGAATC_AATTCTAA	56	745	0.0751678	1_day_old
CCAAATAA_CCAGTTTA_AAGGAATC_AATAACGT	664	21630	0.0306981	1_day_old
CCAAATAA_CGGACTGC_AAGGAATC_CGGCGACA	945	30684	0.0307978	1_day_old
CCAAATAA_GACGTGGC_AAGGAATC_CCATTGTG	853	22675	0.0376185	1_day_old
CCAAATAA_GACGTGGC_ATGTAGAC_CCATTGTG	177	6414	0.0275959	1_day_old
CCAAATAA_GATTCCCA_GTCCTTCG_TTACGCCG	104	3053	0.0340649	1_day_old
CCAAATAA_GGTGAAGG_GTCCTTCG_AATAACGT	303	12359	0.0245165	1_day_old
CCAAATAA_GGTGAAGG_TAACGATT_AATTCTAA	46	1992	0.0230924	1_day_old
CCAAATAA_GGTTCAAT_TAACGATT_AATTCTAA	194	6284	0.0308721	1_day_old
CCAAATAA_GTAAGGAG_GTCCTTCG_GTCACGTC	346	11870	0.0291491	1_day_old
CCAAATAA_GTGTATCG_GTCCTTCG_TTACGCCG	223	10141	0.0219899	1_day_old
CCAAATAA_TCACATGG_AAGGAATC_CCATTGTG	202	6015	0.0335827	1_day_old
CCAAATAA_TCACATGG_GTCCTTCG_AATTCTAA	270	9680	0.0278926	1_day_old
CCAAATAA_TCACATGG_TAACGATT_CCATTGTG	73	2384	0.0306208	1_day_old
CCAAATAA_TCCGAGTT_AAGGAATC_AATAACGT	239	9150	0.0261202	1_day_old
CCAAATAA_TGCATACT_GTCCTTCG_AATAACGT	138	6464	0.021349	1_day_old
CCAAATAA_TTAACTTG_ATGTAGAC_TGCGAAGT	56	1337	0.0418848	1_day_old
CCAACACG_ACTTAGAA_GTCCTTCG_CGGCGACA	168	5347	0.0314195	1_day_old
CCAACACG_AGAGATCT_TAACGATT_GCGGTTAA	14	192	0.0729167	1_day_old
CCAACACG_AGAGTAGA_GTCCTTCG_AATAACGT	596	21103	0.0282424	1_day_old
CCAACACG_AGTCCGAG_TAACGATT_GCGGTTAA	235	5956	0.039456	1_day_old
CCAACACG_ATCCAGGA_ATGTAGAC_TTACGCCG	703	18343	0.0383252	1_day_old
CCAACACG_ATCCAGGA_GTCCTTCG_AATTCTAA	214	6455	0.0331526	1_day_old
CCAACACG_ATTACCGT_TAACGATT_CCATTGTG	139	3660	0.0379781	1_day_old
CCAACACG_ATTGGGTC_TAACGATT_AATTCTAA	245	6231	0.0393195	1_day_old
CCAACACG_CCAGTTTA_AAGGAATC_AATAACGT	569	20341	0.0279731	1_day_old
CCAACACG_CCCTTGGA_ATGTAGAC_TTACGCCG	23	1220	0.0188525	1_day_old
CCAACACG_CCTGCGGG_AAGGAATC_AATAACGT	37	634	0.0583596	1_day_old
CCAACACG_CGCCAGAT_TAACGATT_CGGCGACA	50	3361	0.0148765	1_day_old
CCAACACG_CGGACTGC_TAACGATT_AATTCTAA	46	1969	0.0233621	1_day_old
CCAACACG_CGTACCAA_AAGGAATC_TGCGAAGT	50	1801	0.0277624	1_day_old
CCAACACG_CGTAGACC_GTCCTTCG_TTACGCCG	317	8813	0.0359696	1_day_old
CCAACACG_CTAGAAGT_AAGGAATC_AATAACGT	960	23741	0.0404364	1_day_old
CCAACACG_CTAGAAGT_AAGGAATC_TTACGCCG	167	3646	0.0458036	1_day_old
CCAACACG_GAACTCGA_TAACGATT_GTCACGTC	104	3767	0.0276082	1_day_old
CCAACACG_GACGTGGC_GTCCTTCG_GCGGTTAA	20	724	0.0276243	1_day_old
CCAACACG_GCAGCCTC_GTCCTTCG_TTACGCCG	362	11194	0.0323388	1_day_old
CCAACACG_GCATTAAG_ATGTAGAC_AATTCTAA	151	5907	0.0255629	1_day_old
CCAACACG_GGGCTTGG_GTCCTTCG_CCATTGTG	409	11496	0.0355776	1_day_old
CCAACACG_GGTGAAGG_AAGGAATC_CGGCGACA	92	3387	0.0271627	1_day_old
CCAACACG_GTAAGGAG_GTCCTTCG_CCATTGTG	171	4958	0.0344897	1_day_old
CCAACACG_GTGTATCG_AAGGAATC_AATAACGT	9	126	0.0714286	1_day_old
CCAACACG_GTGTATCG_ATGTAGAC_CCATTGTG	107	2946	0.0363204	1_day_old
CCAACACG_TAACCAAG_AAGGAATC_GCGGTTAA	632	25921	0.0243818	1_day_old
CCAACACG_TAAGTTAC_ATGTAGAC_AATAACGT	126	3667	0.0343605	1_day_old
CCAACACG_TATCCTCT_ATGTAGAC_AATAACGT	178	7354	0.0242045	1_day_old
CCAACACG_TATCCTCT_TAACGATT_AATAACGT	261	10133	0.0257574	1_day_old
CCAACACG_TCAAGAGC_AAGGAATC_AATTCTAA	171	7870	0.0217281	1_day_old
CCAACACG_TCCATCAA_GTCCTTCG_TGCGAAGT	38	1014	0.0374753	1_day_old
CCAACACG_TCTGGCGA_TAACGATT_CCATTGTG	172	5949	0.0289124	1_day_old
CCAACACG_TGATGAAA_TAACGATT_TTACGCCG	217	5420	0.0400369	1_day_old
CCAACACG_TGCATACT_TAACGATT_CGGCGACA	44	2416	0.0182119	1_day_old
CCAACACG_TGGGCGGT_AAGGAATC_GCGGTTAA	82	3997	0.0205154	1_day_old
CCAACACG_TGGGCGGT_TAACGATT_GCGGTTAA	63	2574	0.0244755	1_day_old
CCAACACG_TGTTCCTG_AAGGAATC_CGGCGACA	36	3004	0.011984	1_day_old
CCAACACG_TGTTCCTG_TAACGATT_AATTCTAA	457	17530	0.0260696	1_day_old
CCAACACG_TTGCCTAA_AAGGAATC_CGGCGACA	195	7181	0.027155	1_day_old
CCGTTTGT_ACCGGCCC_TAACGATT_AATTCTAA	73	1901	0.0384008	1_day_old
CCGTTTGT_ACGCGCAG_AAGGAATC_TTACGCCG	457	10807	0.0422874	1_day_old
CCGTTTGT_ACTTAGAA_TAACGATT_GCGGTTAA	44	1023	0.0430108	1_day_old
CCGTTTGT_AGAGTAGA_TAACGATT_AATTCTAA	16	874	0.0183066	1_day_old
CCGTTTGT_AGTCCGAG_ATGTAGAC_AATTCTAA	160	3612	0.0442968	1_day_old
CCGTTTGT_ATCCAGGA_AAGGAATC_TTACGCCG	388	11975	0.0324008	1_day_old
CCGTTTGT_CCAGTTTA_AAGGAATC_TTACGCCG	191	8419	0.0226868	1_day_old
CCGTTTGT_CCTTATGT_GTCCTTCG_GCGGTTAA	76	3595	0.0211405	1_day_old
CCGTTTGT_CGTACCAA_AAGGAATC_AATAACGT	528	11879	0.0444482	1_day_old
CCGTTTGT_CTAAGCCT_GTCCTTCG_CGGCGACA	105	2858	0.036739	1_day_old
CCGTTTGT_CTAGAAGT_AAGGAATC_TGCGAAGT	76	2828	0.0268741	1_day_old
CCGTTTGT_GATCATTC_ATGTAGAC_CCATTGTG	212	6603	0.0321066	1_day_old
CCGTTTGT_GATTCCCA_GTCCTTCG_AATTCTAA	134	4206	0.0318592	1_day_old
CCGTTTGT_GCAAATTT_AAGGAATC_GCGGTTAA	22	618	0.0355987	1_day_old
CCGTTTGT_GCAAATTT_TAACGATT_TTACGCCG	546	11454	0.0476689	1_day_old
CCGTTTGT_GCAGCCTC_GTCCTTCG_GTCACGTC	99	2995	0.0330551	1_day_old
CCGTTTGT_GCATTAAG_AAGGAATC_TTACGCCG	21	1233	0.0170316	1_day_old
CCGTTTGT_GGTGAAGG_AAGGAATC_CGGCGACA	459	16353	0.0280682	1_day_old
CCGTTTGT_GTAAGGAG_GTCCTTCG_TTACGCCG	28	637	0.043956	1_day_old
CCGTTTGT_GTGTATCG_GTCCTTCG_GCGGTTAA	14	179	0.0782123	1_day_old
CCGTTTGT_TAAGTTAC_AAGGAATC_TTACGCCG	28	748	0.0374332	1_day_old
CCGTTTGT_TATCCTCT_TAACGATT_GTCACGTC	72	1835	0.0392371	1_day_old
CCGTTTGT_TCAAGAGC_AAGGAATC_CGGCGACA	123	4428	0.0277778	1_day_old
CCGTTTGT_TGATGAAA_GTCCTTCG_GCGGTTAA	344	7823	0.0439729	1_day_old
CCGTTTGT_TGATTGTT_GTCCTTCG_CGGCGACA	76	2423	0.0313661	1_day_old
CCGTTTGT_TGGAAATC_GTCCTTCG_AATAACGT	23	561	0.0409982	1_day_old
CCGTTTGT_TGTTCCTG_GTCCTTCG_CGGCGACA	233	6661	0.0349797	1_day_old
CCGTTTGT_TTAACTTG_AAGGAATC_TTACGCCG	15	163	0.0920245	1_day_old
CCGTTTGT_TTAACTTG_ATGTAGAC_GCGGTTAA	155	3280	0.0472561	1_day_old
CCTCGCAG_ACTGCATA_TAACGATT_AATAACGT	124	3802	0.0326144	1_day_old
CCTCGCAG_ACTTGTTG_AAGGAATC_TGCGAAGT	57	2677	0.0212925	1_day_old
CCTCGCAG_AGCCGTTC_AAGGAATC_AATAACGT	217	8770	0.0247434	1_day_old
CCTCGCAG_AGGTTGCC_AAGGAATC_CCATTGTG	296	7472	0.0396146	1_day_old
CCTCGCAG_ATTACCGT_AAGGAATC_AATTCTAA	20	468	0.042735	1_day_old
CCTCGCAG_CCACCGTT_TAACGATT_AATAACGT	7	265	0.0264151	1_day_old
CCTCGCAG_CCCTTGGA_TAACGATT_TTACGCCG	513	12975	0.0395376	1_day_old
CCTCGCAG_CGCCAGAT_AAGGAATC_GCGGTTAA	155	3946	0.0392803	1_day_old
CCTCGCAG_CGTAGACC_GTCCTTCG_TGCGAAGT	114	3341	0.0341215	1_day_old
CCTCGCAG_GATCATTC_TAACGATT_AATAACGT	107	4735	0.0225977	1_day_old
CCTCGCAG_GATCATTC_TAACGATT_TGCGAAGT	177	5514	0.0321001	1_day_old
CCTCGCAG_GCATTAAG_AAGGAATC_CCATTGTG	151	5319	0.0283888	1_day_old
CCTCGCAG_TCCATCAA_TAACGATT_AATTCTAA	140	4575	0.0306011	1_day_old
CCTCGCAG_TCCGAGTT_GTCCTTCG_CGGCGACA	627	16987	0.0369106	1_day_old
CCTCGCAG_TCTGGCGA_AAGGAATC_AATAACGT	257	9450	0.0271958	1_day_old
CCTCGCAG_TCTGGCGA_AAGGAATC_TTACGCCG	62	911	0.0680571	1_day_old
CCTCGCAG_TGGAAATC_TAACGATT_TTACGCCG	32	1050	0.0304762	1_day_old
CCTCGCAG_TGTTCCTG_GTCCTTCG_AATAACGT	268	7696	0.0348233	1_day_old
CCTCGCAG_TTAACTTG_GTCCTTCG_GCGGTTAA	177	6236	0.0283836	1_day_old
CCTCGCAG_TTGCCTAA_TAACGATT_AATTCTAA	207	7233	0.0286188	1_day_old
CCTCGCAG_TTGCCTAA_TAACGATT_TGCGAAGT	94	2423	0.0387949	1_day_old
CCTCGCAG_TTTCTAGC_GTCCTTCG_CCATTGTG	201	7139	0.0281552	1_day_old
CGAGGCTG_AAGGAGTA_AAGGAATC_TTACGCCG	171	4898	0.0349122	1_day_old
CGAGGCTG_ACCGGCCC_AAGGAATC_AATTCTAA	179	8292	0.0215871	1_day_old
CGAGGCTG_ACGCGCAG_ATGTAGAC_TGCGAAGT	42	1360	0.0308824	1_day_old
CGAGGCTG_ACTGCATA_AAGGAATC_CCATTGTG	44	1888	0.0233051	1_day_old
CGAGGCTG_ACTTGTTG_GTCCTTCG_CCATTGTG	12	207	0.057971	1_day_old
CGAGGCTG_CCTGCGGG_GTCCTTCG_CCATTGTG	9	242	0.0371901	1_day_old
CGAGGCTG_CGATAGGG_GTCCTTCG_CCATTGTG	8	115	0.0695652	1_day_old
CGAGGCTG_GCAGCCTC_TAACGATT_TTACGCCG	484	17603	0.0274953	1_day_old
CGAGGCTG_GGTGAAGG_AAGGAATC_TTACGCCG	13	122	0.106557	1_day_old
CGAGGCTG_GGTGAAGG_GTCCTTCG_CCATTGTG	14	384	0.0364583	1_day_old
CGAGGCTG_GTCGGACT_GTCCTTCG_GTCACGTC	32	633	0.0505529	1_day_old
CGAGGCTG_GTGTATCG_GTCCTTCG_CCATTGTG	10	213	0.0469484	1_day_old
CGAGGCTG_TAAGTTAC_ATGTAGAC_CCATTGTG	13	408	0.0318627	1_day_old
CGAGGCTG_TACTGACC_AAGGAATC_TTACGCCG	282	7709	0.0365806	1_day_old
CGAGGCTG_TACTGACC_GTCCTTCG_CCATTGTG	11	161	0.068323	1_day_old
CGAGGCTG_TATCCTCT_ATGTAGAC_CGGCGACA	392	11073	0.0354014	1_day_old
CGAGGCTG_TATCCTCT_GTCCTTCG_CCATTGTG	23	459	0.0501089	1_day_old
CGAGGCTG_TCACATGG_TAACGATT_TTACGCCG	119	4345	0.0273878	1_day_old
CGAGGCTG_TCCGAGTT_TAACGATT_CGGCGACA	93	5264	0.0176672	1_day_old
CGAGGCTG_TTGCCTAA_ATGTAGAC_GCGGTTAA	262	7700	0.034026	1_day_old
CGCGGACA_AACATGAT_TAACGATT_CCATTGTG	183	5825	0.0314163	1_day_old
CGCGGACA_ACATTCGT_TAACGATT_AATTCTAA	10	673	0.0148588	1_day_old
CGCGGACA_AGAGTAGA_ATGTAGAC_CCATTGTG	202	4547	0.0444249	1_day_old
CGCGGACA_AGTCCGAG_GTCCTTCG_AATAACGT	268	12794	0.0209473	1_day_old
CGCGGACA_ATCCAGGA_ATGTAGAC_TGCGAAGT	86	3770	0.0228117	1_day_old
CGCGGACA_ATGGTCAT_AAGGAATC_AATAACGT	695	37567	0.0185003	1_day_old
CGCGGACA_ATTGGGTC_GTCCTTCG_TTACGCCG	75	2595	0.0289017	1_day_old
CGCGGACA_CAGCAACG_AAGGAATC_CCATTGTG	18	509	0.0353635	1_day_old
CGCGGACA_CCTGCGGG_TAACGATT_CGGCGACA	226	10060	0.0224652	1_day_old
CGCGGACA_CGTACCAA_TAACGATT_CGGCGACA	159	3415	0.0465593	1_day_old
CGCGGACA_GCAGCCTC_ATGTAGAC_TTACGCCG	173	6862	0.0252113	1_day_old
CGCGGACA_GTGTATCG_GTCCTTCG_CGGCGACA	152	6260	0.0242812	1_day_old
CGCGGACA_TAAGTTAC_ATGTAGAC_GTCACGTC	796	36226	0.0219732	1_day_old
CGCGGACA_TCACATGG_GTCCTTCG_TGCGAAGT	47	2346	0.0200341	1_day_old
CGCGGACA_TCCATCAA_ATGTAGAC_TTACGCCG	327	9670	0.0338159	1_day_old
CGCGGACA_TGGGCGGT_ATGTAGAC_CCATTGTG	228	6959	0.0327633	1_day_old
CGGCCAAT_AACATGAT_TAACGATT_GTCACGTC	8	539	0.0148423	1_day_old
CGGCCAAT_ACTTAGAA_GTCCTTCG_GTCACGTC	18	957	0.0188088	1_day_old
CGGCCAAT_AGAGTAGA_TAACGATT_GCGGTTAA	195	5866	0.0332424	1_day_old
CGGCCAAT_ATCGAATG_AAGGAATC_CGGCGACA	916	29930	0.0306047	1_day_old
CGGCCAAT_ATCGAATG_GTCCTTCG_GTCACGTC	172	5098	0.0337387	1_day_old
CGGCCAAT_CCAGTTTA_AAGGAATC_TTACGCCG	264	9882	0.0267152	1_day_old
CGGCCAAT_CCAGTTTA_GTCCTTCG_AATTCTAA	273	9442	0.0289134	1_day_old
CGGCCAAT_CCAGTTTA_GTCCTTCG_CGGCGACA	174	5266	0.0330422	1_day_old
CGGCCAAT_CGATAGGG_AAGGAATC_GTCACGTC	25	2142	0.0116713	1_day_old
CGGCCAAT_CGCCAGAT_TAACGATT_TTACGCCG	259	10954	0.0236443	1_day_old
CGGCCAAT_CGTACCAA_ATGTAGAC_AATAACGT	686	18374	0.0373354	1_day_old
CGGCCAAT_CGTAGACC_ATGTAGAC_TTACGCCG	326	13620	0.0239354	1_day_old
CGGCCAAT_CTAAGCCT_GTCCTTCG_GCGGTTAA	389	12737	0.0305409	1_day_old
CGGCCAAT_CTTTAACA_TAACGATT_AATAACGT	89	3157	0.0281913	1_day_old
CGGCCAAT_GATCATTC_TAACGATT_AATAACGT	93	2795	0.0332737	1_day_old
CGGCCAAT_GATTCCCA_AAGGAATC_TTACGCCG	109	2950	0.0369492	1_day_old
CGGCCAAT_GCAGCCTC_ATGTAGAC_CGGCGACA	89	2645	0.0336484	1_day_old
CGGCCAAT_GCATTAAG_ATGTAGAC_CCATTGTG	130	3368	0.0385986	1_day_old
CGGCCAAT_GCATTAAG_ATGTAGAC_TTACGCCG	162	5452	0.0297139	1_day_old
CGGCCAAT_GTAAGGAG_GTCCTTCG_GCGGTTAA	249	9806	0.0253926	1_day_old
CGGCCAAT_TAACCAAG_AAGGAATC_GCGGTTAA	134	5408	0.0247781	1_day_old
CGGCCAAT_TAGATCGC_GTCCTTCG_TGCGAAGT	179	6365	0.0281225	1_day_old
CGGCCAAT_TCACATGG_ATGTAGAC_TTACGCCG	413	12842	0.0321601	1_day_old
CGGCCAAT_TCCGAGTT_GTCCTTCG_GCGGTTAA	77	4197	0.0183464	1_day_old
CGGCCAAT_TGATTGTT_AAGGAATC_TTACGCCG	138	5231	0.0263812	1_day_old
CGGTTCCC_ACTTGTTG_ATGTAGAC_AATTCTAA	44	1740	0.0252874	1_day_old
CGGTTCCC_AGAGTAGA_GTCCTTCG_CGGCGACA	320	14985	0.0213547	1_day_old
CGGTTCCC_CCAGTTTA_ATGTAGAC_TTACGCCG	170	6624	0.0256643	1_day_old
CGGTTCCC_CCCTTGGA_TAACGATT_TGCGAAGT	76	1980	0.0383838	1_day_old
CGGTTCCC_CCTTATGT_AAGGAATC_TTACGCCG	139	5337	0.0260446	1_day_old
CGGTTCCC_CGATAGGG_ATGTAGAC_CCATTGTG	115	2668	0.0431034	1_day_old
CGGTTCCC_CGTAGACC_AAGGAATC_GCGGTTAA	106	2836	0.0373766	1_day_old
CGGTTCCC_GACGTGGC_ATGTAGAC_AATAACGT	240	6692	0.0358637	1_day_old
CGGTTCCC_GCATTAAG_TAACGATT_GCGGTTAA	182	5323	0.0341912	1_day_old
CGGTTCCC_GGTGAAGG_AAGGAATC_TTACGCCG	8	134	0.0597015	1_day_old
CGGTTCCC_GTGTATCG_TAACGATT_AATAACGT	23	717	0.0320781	1_day_old
CGGTTCCC_TGTTCCTG_TAACGATT_CGGCGACA	19	1090	0.0174312	1_day_old
CGTACTAG_AAGGAGTA_ATGTAGAC_CGGCGACA	286	11317	0.0252717	1_day_old
CGTACTAG_AAGGAGTA_GTCCTTCG_CCATTGTG	10	176	0.0568182	1_day_old
CGTACTAG_ACTGCATA_TAACGATT_AATTCTAA	20	1955	0.0102302	1_day_old
CGTACTAG_ATGGTCAT_TAACGATT_GCGGTTAA	19	951	0.019979	1_day_old
CGTACTAG_CAGCAACG_TAACGATT_CGGCGACA	35	1161	0.0301464	1_day_old
CGTACTAG_CCAGTTTA_GTCCTTCG_AATAACGT	14	161	0.0869565	1_day_old
CGTACTAG_CCCTTGGA_GTCCTTCG_GCGGTTAA	78	2219	0.035151	1_day_old
CGTACTAG_CCCTTGGA_TAACGATT_TGCGAAGT	24	669	0.0358744	1_day_old
CGTACTAG_CCTGCGGG_AAGGAATC_AATTCTAA	11	197	0.0558376	1_day_old
CGTACTAG_CCTTATGT_AAGGAATC_CCATTGTG	591	17131	0.0344989	1_day_old
CGTACTAG_CGATAGGG_AAGGAATC_GCGGTTAA	186	6705	0.0277405	1_day_old
CGTACTAG_CTTTAACA_TAACGATT_CGGCGACA	116	5683	0.0204118	1_day_old
CGTACTAG_GAGACGTG_ATGTAGAC_AATAACGT	19	826	0.0230024	1_day_old
CGTACTAG_GAGACGTG_GTCCTTCG_TGCGAAGT	18	576	0.03125	1_day_old
CGTACTAG_GGCACGGA_AAGGAATC_CCATTGTG	296	7550	0.0392053	1_day_old
CGTACTAG_GGCACGGA_GTCCTTCG_CGGCGACA	235	6458	0.036389	1_day_old
CGTACTAG_GGTGAAGG_TAACGATT_TTACGCCG	66	2212	0.0298373	1_day_old
CGTACTAG_GTAAGGAG_AAGGAATC_GCGGTTAA	223	7078	0.0315061	1_day_old
CGTACTAG_GTAAGGAG_ATGTAGAC_GTCACGTC	247	8997	0.0274536	1_day_old
CGTACTAG_GTAAGGAG_ATGTAGAC_TGCGAAGT	135	4351	0.0310274	1_day_old
CGTACTAG_GTCGGACT_GTCCTTCG_GTCACGTC	295	8227	0.0358575	1_day_old
CGTACTAG_TAACCAAG_AAGGAATC_AATTCTAA	261	8595	0.0303665	1_day_old
CGTACTAG_TCAAGAGC_TAACGATT_CCATTGTG	50	1837	0.0272183	1_day_old
CGTACTAG_TCACATGG_TAACGATT_TTACGCCG	313	8548	0.0366168	1_day_old
CGTACTAG_TGATGAAA_ATGTAGAC_CCATTGTG	87	2441	0.0356411	1_day_old
CGTACTAG_TGGGCGGT_AAGGAATC_AATTCTAA	163	7513	0.0216957	1_day_old
CGTACTAG_TTGCCTAA_AAGGAATC_CCATTGTG	325	13213	0.024597	1_day_old
CTCATGGG_AATCTACA_GTCCTTCG_AATTCTAA	307	10835	0.0283341	1_day_old
CTCATGGG_ACATTCGT_AAGGAATC_CCATTGTG	34	1622	0.0209618	1_day_old
CTCATGGG_ACCGGCCC_AAGGAATC_GCGGTTAA	72	1569	0.0458891	1_day_old
CTCATGGG_ACTGCATA_TAACGATT_GTCACGTC	68	3092	0.0219922	1_day_old
CTCATGGG_AGTCCGAG_GTCCTTCG_TTACGCCG	13	358	0.0363128	1_day_old
CTCATGGG_ATCCAGGA_AAGGAATC_TTACGCCG	90	2903	0.0310024	1_day_old
CTCATGGG_ATTACCGT_TAACGATT_GTCACGTC	99	2861	0.0346033	1_day_old
CTCATGGG_CCAGTTTA_GTCCTTCG_CGGCGACA	157	5254	0.029882	1_day_old
CTCATGGG_CGTAGACC_GTCCTTCG_TTACGCCG	159	3875	0.0410323	1_day_old
CTCATGGG_CTAGAAGT_ATGTAGAC_AATAACGT	258	8514	0.030303	1_day_old
CTCATGGG_GAACTCGA_TAACGATT_TGCGAAGT	106	3013	0.0351809	1_day_old
CTCATGGG_GACGTGGC_AAGGAATC_TGCGAAGT	18	619	0.0290792	1_day_old
CTCATGGG_GACGTGGC_ATGTAGAC_AATAACGT	110	2580	0.0426357	1_day_old
CTCATGGG_GACGTGGC_ATGTAGAC_GTCACGTC	27	713	0.0378682	1_day_old
CTCATGGG_GATTCCCA_AAGGAATC_CGGCGACA	103	5614	0.018347	1_day_old
CTCATGGG_TATTTGCG_GTCCTTCG_CGGCGACA	22	1361	0.0161646	1_day_old
CTCATGGG_TATTTGCG_TAACGATT_TTACGCCG	203	4562	0.044498	1_day_old
CTCATGGG_TCACATGG_ATGTAGAC_AATAACGT	194	8269	0.0234611	1_day_old
CTCATGGG_TGATGAAA_AAGGAATC_TTACGCCG	208	5093	0.0408404	1_day_old
CTCATGGG_TGCATACT_AAGGAATC_GTCACGTC	188	6522	0.0288255	1_day_old
CTCTCTAC_AAGGAGTA_GTCCTTCG_CCATTGTG	7	188	0.037234	1_day_old
CTCTCTAC_ACATTCGT_ATGTAGAC_GTCACGTC	184	4600	0.04	1_day_old
CTCTCTAC_ACGCGCAG_GTCCTTCG_CCATTGTG	177	2570	0.0688716	1_day_old
CTCTCTAC_ACGCGCAG_TAACGATT_TTACGCCG	11	307	0.0358306	1_day_old
CTCTCTAC_ACTTAGAA_AAGGAATC_CGGCGACA	94	2733	0.0343944	1_day_old
CTCTCTAC_ATCCAGGA_TAACGATT_TTACGCCG	32	1893	0.0169044	1_day_old
CTCTCTAC_ATCGAATG_GTCCTTCG_TGCGAAGT	61	2101	0.0290338	1_day_old
CTCTCTAC_CCAGTTTA_GTCCTTCG_AATAACGT	9	190	0.0473684	1_day_old
CTCTCTAC_CCCTTGGA_GTCCTTCG_TTACGCCG	34	407	0.0835381	1_day_old
CTCTCTAC_CGATAGGG_AAGGAATC_AATTCTAA	61	944	0.0646186	1_day_old
CTCTCTAC_CGATAGGG_ATGTAGAC_CGGCGACA	120	2283	0.0525624	1_day_old
CTCTCTAC_CGATAGGG_TAACGATT_CCATTGTG	16	505	0.0316832	1_day_old
CTCTCTAC_CGCCAGAT_AAGGAATC_TGCGAAGT	252	9809	0.0256907	1_day_old
CTCTCTAC_CGCCAGAT_GTCCTTCG_AATAACGT	224	7112	0.0314961	1_day_old
CTCTCTAC_CGTAGACC_GTCCTTCG_GCGGTTAA	13	830	0.0156627	1_day_old
CTCTCTAC_CTAAGCCT_AAGGAATC_GTCACGTC	4	205	0.0195122	1_day_old
CTCTCTAC_GCAGCCTC_TAACGATT_GTCACGTC	51	1750	0.0291429	1_day_old
CTCTCTAC_GGCACGGA_GTCCTTCG_AATAACGT	318	11167	0.0284768	1_day_old
CTCTCTAC_GGCACGGA_GTCCTTCG_GCGGTTAA	24	258	0.0930233	1_day_old
CTCTCTAC_GGTGAAGG_GTCCTTCG_GTCACGTC	69	1954	0.0353122	1_day_old
CTCTCTAC_GTAAGGAG_ATGTAGAC_CCATTGTG	36	1901	0.0189374	1_day_old
CTCTCTAC_TTAACTTG_GTCCTTCG_TGCGAAGT	24	1066	0.0225141	1_day_old
CTCTCTAC_TTGCCTAA_AAGGAATC_GTCACGTC	32	914	0.0350109	1_day_old
CTTGGGTC_AAGGAGTA_ATGTAGAC_GTCACGTC	173	3511	0.0492737	1_day_old
CTTGGGTC_ACATTCGT_AAGGAATC_CCATTGTG	226	6378	0.0354343	1_day_old
CTTGGGTC_ACCGGCCC_AAGGAATC_AATTCTAA	274	9714	0.0282067	1_day_old
CTTGGGTC_ACCGGCCC_GTCCTTCG_TGCGAAGT	98	3654	0.0268199	1_day_old
CTTGGGTC_ACTTGTTG_ATGTAGAC_GCGGTTAA	227	8596	0.0264076	1_day_old
CTTGGGTC_AGAGTAGA_AAGGAATC_TGCGAAGT	185	7006	0.0264059	1_day_old
CTTGGGTC_AGAGTAGA_ATGTAGAC_TGCGAAGT	100	3118	0.0320718	1_day_old
CTTGGGTC_AGTCCGAG_ATGTAGAC_TTACGCCG	112	2495	0.0448898	1_day_old
CTTGGGTC_CCAGTTTA_ATGTAGAC_GTCACGTC	950	21703	0.0437728	1_day_old
CTTGGGTC_CCCTTGGA_AAGGAATC_AATAACGT	187	8054	0.0232183	1_day_old
CTTGGGTC_CCCTTGGA_AAGGAATC_GTCACGTC	265	9421	0.0281286	1_day_old
CTTGGGTC_CCCTTGGA_GTCCTTCG_CGGCGACA	111	4057	0.0273601	1_day_old
CTTGGGTC_CCTTATGT_TAACGATT_GTCACGTC	271	10646	0.0254556	1_day_old
CTTGGGTC_CGGACTGC_GTCCTTCG_TGCGAAGT	152	4055	0.0374846	1_day_old
CTTGGGTC_CGTAGACC_GTCCTTCG_TTACGCCG	197	7280	0.0270604	1_day_old
CTTGGGTC_GATCATTC_AAGGAATC_CCATTGTG	252	7576	0.0332629	1_day_old
CTTGGGTC_GGTTCAAT_ATGTAGAC_GCGGTTAA	130	6751	0.0192564	1_day_old
CTTGGGTC_GTAAGGAG_AAGGAATC_TTACGCCG	151	4990	0.0302605	1_day_old
CTTGGGTC_TAAGTTAC_AAGGAATC_GCGGTTAA	225	9224	0.0243929	1_day_old
CTTGGGTC_TAAGTTAC_TAACGATT_GCGGTTAA	489	12765	0.0383079	1_day_old
CTTGGGTC_TACTGACC_GTCCTTCG_TTACGCCG	340	13547	0.0250978	1_day_old
CTTGGGTC_TCAAGAGC_AAGGAATC_AATTCTAA	170	7755	0.0219213	1_day_old
CTTGGGTC_TCCGAGTT_TAACGATT_CGGCGACA	74	2520	0.0293651	1_day_old
CTTGGGTC_TTAACTTG_TAACGATT_TGCGAAGT	104	2689	0.0386761	1_day_old
CTTGGGTC_TTCGTGCA_AAGGAATC_AATTCTAA	291	10268	0.0283405	1_day_old
CTTGGGTC_TTCGTGCA_TAACGATT_GTCACGTC	146	4538	0.0321728	1_day_old
GAAATGCC_ACGCGCAG_GTCCTTCG_CCATTGTG	67	672	0.0997024	1_day_old
GAAATGCC_ACTTGTTG_AAGGAATC_AATAACGT	502	11737	0.0427707	1_day_old
GAAATGCC_AGAGTAGA_GTCCTTCG_CCATTGTG	141	5997	0.0235118	1_day_old
GAAATGCC_AGCCGTTC_ATGTAGAC_GTCACGTC	576	16595	0.0347092	1_day_old
GAAATGCC_AGGTTGCC_ATGTAGAC_CCATTGTG	225	7012	0.0320878	1_day_old
GAAATGCC_ATGGTCAT_AAGGAATC_AATTCTAA	609	18381	0.033132	1_day_old
GAAATGCC_ATTACCGT_AAGGAATC_GTCACGTC	525	27406	0.0191564	1_day_old
GAAATGCC_CAGCAACG_GTCCTTCG_TTACGCCG	327	9781	0.0334322	1_day_old
GAAATGCC_CAGCAACG_TAACGATT_GCGGTTAA	87	3717	0.023406	1_day_old
GAAATGCC_CCAGTTTA_AAGGAATC_CCATTGTG	97	3913	0.0247892	1_day_old
GAAATGCC_CCCTTGGA_AAGGAATC_CGGCGACA	195	8234	0.0236823	1_day_old
GAAATGCC_CCCTTGGA_GTCCTTCG_TTACGCCG	10	144	0.0694444	1_day_old
GAAATGCC_CCTTATGT_GTCCTTCG_GCGGTTAA	112	5305	0.0211122	1_day_old
GAAATGCC_CCTTATGT_TAACGATT_GTCACGTC	58	1428	0.0406162	1_day_old
GAAATGCC_CGATAGGG_ATGTAGAC_CGGCGACA	49	678	0.0722714	1_day_old
GAAATGCC_CGATAGGG_ATGTAGAC_GTCACGTC	135	4898	0.0275623	1_day_old
GAAATGCC_CGATAGGG_TAACGATT_CCATTGTG	488	12864	0.0379353	1_day_old
GAAATGCC_CTAAGCCT_TAACGATT_GCGGTTAA	626	17642	0.0354835	1_day_old
GAAATGCC_CTAGAAGT_ATGTAGAC_TGCGAAGT	161	10642	0.0151287	1_day_old
GAAATGCC_GATTCCCA_AAGGAATC_TTACGCCG	20	213	0.0938967	1_day_old
GAAATGCC_GCAAATTT_AAGGAATC_CCATTGTG	159	4160	0.0382212	1_day_old
GAAATGCC_GGTGAAGG_GTCCTTCG_TTACGCCG	14	297	0.047138	1_day_old
GAAATGCC_GGTTCAAT_ATGTAGAC_CCATTGTG	1094	26958	0.0405816	1_day_old
GAAATGCC_GTAAGGAG_GTCCTTCG_CCATTGTG	131	4664	0.0280875	1_day_old
GAAATGCC_GTCGGACT_TAACGATT_TTACGCCG	124	4810	0.0257796	1_day_old
GAAATGCC_GTGTATCG_TAACGATT_GTCACGTC	75	2160	0.0347222	1_day_old
GAAATGCC_TAACCAAG_TAACGATT_AATTCTAA	383	9216	0.0415582	1_day_old
GAAATGCC_TAAGTTAC_TAACGATT_CGGCGACA	46	1346	0.0341753	1_day_old
GAAATGCC_TATCCTCT_GTCCTTCG_AATAACGT	206	6411	0.0321323	1_day_old
GAAATGCC_TATTTGCG_TAACGATT_CCATTGTG	80	1804	0.0443459	1_day_old
GAAATGCC_TGATTGTT_AAGGAATC_AATAACGT	309	8800	0.0351136	1_day_old
GAAATGCC_TGCATACT_ATGTAGAC_CGGCGACA	125	3448	0.0362529	1_day_old
GAAATGCC_TGGAAATC_AAGGAATC_CGGCGACA	92	5669	0.0162286	1_day_old
GACGCTCC_AACATGAT_GTCCTTCG_GTCACGTC	107	3154	0.0339252	1_day_old
GACGCTCC_ACTGCATA_AAGGAATC_GTCACGTC	152	4580	0.0331878	1_day_old
GACGCTCC_AGGTTGCC_GTCCTTCG_AATTCTAA	102	2838	0.0359408	1_day_old
GACGCTCC_AGTCCGAG_AAGGAATC_CCATTGTG	133	5193	0.0256114	1_day_old
GACGCTCC_ATGGTCAT_GTCCTTCG_CGGCGACA	8	727	0.0110041	1_day_old
GACGCTCC_CCCTTGGA_GTCCTTCG_GCGGTTAA	32	909	0.0352035	1_day_old
GACGCTCC_CGATAGGG_AAGGAATC_TGCGAAGT	14	434	0.0322581	1_day_old
GACGCTCC_CGATAGGG_TAACGATT_AATAACGT	33	926	0.0356371	1_day_old
GACGCTCC_GCATTAAG_TAACGATT_AATAACGT	133	5614	0.0236908	1_day_old
GACGCTCC_GGTGAAGG_AAGGAATC_TGCGAAGT	59	1989	0.0296631	1_day_old
GACGCTCC_GGTGAAGG_AAGGAATC_TTACGCCG	103	3338	0.0308568	1_day_old
GACGCTCC_GTAAGGAG_GTCCTTCG_AATAACGT	266	11774	0.0225922	1_day_old
GACGCTCC_GTGTATCG_GTCCTTCG_TTACGCCG	24	246	0.097561	1_day_old
GACGCTCC_TAACCAAG_ATGTAGAC_AATTCTAA	121	3122	0.0387572	1_day_old
GACGCTCC_TCAAGAGC_AAGGAATC_TTACGCCG	80	3813	0.0209809	1_day_old
GACGCTCC_TGGGCGGT_ATGTAGAC_TTACGCCG	157	7333	0.0214101	1_day_old
GACGCTCC_TGTTCCTG_GTCCTTCG_CGGCGACA	43	1830	0.0234973	1_day_old
GACGCTCC_TTGCCTAA_AAGGAATC_TTACGCCG	108	5218	0.0206976	1_day_old
GACGCTCC_TTGCCTAA_GTCCTTCG_GCGGTTAA	129	3795	0.0339921	1_day_old
GACTTAGT_AACATGAT_GTCCTTCG_GCGGTTAA	24	956	0.0251046	1_day_old
GACTTAGT_AAGGAGTA_AAGGAATC_GTCACGTC	72	1358	0.0530191	1_day_old
GACTTAGT_AATCTACA_AAGGAATC_GTCACGTC	12	134	0.0895522	1_day_old
GACTTAGT_ACATTCGT_AAGGAATC_TGCGAAGT	281	9284	0.0302671	1_day_old
GACTTAGT_ACCGGCCC_TAACGATT_TGCGAAGT	39	819	0.047619	1_day_old
GACTTAGT_ACGCGCAG_ATGTAGAC_CCATTGTG	12	186	0.0645161	1_day_old
GACTTAGT_ACGCGCAG_GTCCTTCG_CCATTGTG	71	859	0.0826542	1_day_old
GACTTAGT_ACTTGTTG_AAGGAATC_GTCACGTC	23	255	0.0901961	1_day_old
GACTTAGT_ACTTGTTG_GTCCTTCG_CGGCGACA	120	4383	0.0273785	1_day_old
GACTTAGT_AGAGTAGA_ATGTAGAC_CCATTGTG	477	13889	0.0343437	1_day_old
GACTTAGT_AGTCCGAG_AAGGAATC_GTCACGTC	17	137	0.124088	1_day_old
GACTTAGT_ATCCAGGA_TAACGATT_AATTCTAA	78	3388	0.0230224	1_day_old
GACTTAGT_ATGGTCAT_AAGGAATC_GTCACGTC	67	612	0.109477	1_day_old
GACTTAGT_ATTACCGT_ATGTAGAC_CCATTGTG	8	125	0.064	1_day_old
GACTTAGT_ATTGGGTC_AAGGAATC_GTCACGTC	127	5531	0.0229615	1_day_old
GACTTAGT_CAGCAACG_GTCCTTCG_AATAACGT	476	14679	0.0324273	1_day_old
GACTTAGT_CCCTTGGA_ATGTAGAC_AATTCTAA	130	4352	0.0298713	1_day_old
GACTTAGT_CCCTTGGA_GTCCTTCG_TTACGCCG	20	260	0.0769231	1_day_old
GACTTAGT_CCTGCGGG_AAGGAATC_GTCACGTC	101	1359	0.0743194	1_day_old
GACTTAGT_CCTGCGGG_TAACGATT_AATTCTAA	349	8940	0.039038	1_day_old
GACTTAGT_CCTTATGT_ATGTAGAC_TTACGCCG	150	6069	0.0247158	1_day_old
GACTTAGT_CGATAGGG_AAGGAATC_AATTCTAA	23	284	0.0809859	1_day_old
GACTTAGT_CGATAGGG_AAGGAATC_GTCACGTC	23	229	0.100437	1_day_old
GACTTAGT_CGATAGGG_ATGTAGAC_CCATTGTG	14	166	0.0843373	1_day_old
GACTTAGT_CGATAGGG_ATGTAGAC_CGGCGACA	52	733	0.0709413	1_day_old
GACTTAGT_CTAAGCCT_ATGTAGAC_TGCGAAGT	85	3097	0.0274459	1_day_old
GACTTAGT_GAACTCGA_AAGGAATC_AATTCTAA	913	49227	0.0185467	1_day_old
GACTTAGT_GAGACGTG_AAGGAATC_GTCACGTC	270	8591	0.0314282	1_day_old
GACTTAGT_GAGACGTG_ATGTAGAC_AATAACGT	338	9803	0.0344792	1_day_old
GACTTAGT_GAGACGTG_TAACGATT_AATAACGT	482	12656	0.0380847	1_day_old
GACTTAGT_GAGACGTG_TAACGATT_GTCACGTC	76	2556	0.029734	1_day_old
GACTTAGT_GATTCCCA_AAGGAATC_GTCACGTC	89	1036	0.0859073	1_day_old
GACTTAGT_GATTCCCA_ATGTAGAC_CCATTGTG	89	1891	0.047065	1_day_old
GACTTAGT_GCAGCCTC_TAACGATT_TGCGAAGT	65	1652	0.0393462	1_day_old
GACTTAGT_GCATTAAG_ATGTAGAC_AATTCTAA	263	10230	0.0257087	1_day_old
GACTTAGT_GCATTAAG_TAACGATT_AATTCTAA	159	5267	0.030188	1_day_old
GACTTAGT_GGCACGGA_ATGTAGAC_AATTCTAA	189	5942	0.0318075	1_day_old
GACTTAGT_GGGCTTGG_GTCCTTCG_AATAACGT	1149	38521	0.0298279	1_day_old
GACTTAGT_GGTGAAGG_ATGTAGAC_GTCACGTC	61	1639	0.0372178	1_day_old
GACTTAGT_GTGTATCG_AAGGAATC_GTCACGTC	51	557	0.0915619	1_day_old
GACTTAGT_GTGTATCG_TAACGATT_GTCACGTC	106	4703	0.0225388	1_day_old
GACTTAGT_TAACCAAG_TAACGATT_AATTCTAA	617	23558	0.0261907	1_day_old
GACTTAGT_TAAGTTAC_ATGTAGAC_GCGGTTAA	180	4884	0.036855	1_day_old
GACTTAGT_TACTGACC_GTCCTTCG_GCGGTTAA	439	14751	0.0297607	1_day_old
GACTTAGT_TATCCTCT_AAGGAATC_GTCACGTC	49	412	0.118932	1_day_old
GACTTAGT_TCAAGAGC_TAACGATT_AATTCTAA	75	2651	0.0282912	1_day_old
GACTTAGT_TCACATGG_AAGGAATC_GTCACGTC	28	850	0.0329412	1_day_old
GACTTAGT_TCCATCAA_AAGGAATC_GTCACGTC	13	118	0.110169	1_day_old
GACTTAGT_TCCATCAA_TAACGATT_CCATTGTG	134	3216	0.0416667	1_day_old
GACTTAGT_TGATGAAA_AAGGAATC_GTCACGTC	51	518	0.0984556	1_day_old
GACTTAGT_TGATTGTT_GTCCTTCG_CCATTGTG	189	7442	0.0253964	1_day_old
GACTTAGT_TTAACTTG_ATGTAGAC_TTACGCCG	200	5949	0.0336191	1_day_old
GACTTAGT_TTCGTGCA_AAGGAATC_CCATTGTG	134	4754	0.0281868	1_day_old
GATCCAAA_AATCTACA_GTCCTTCG_AATTCTAA	489	14555	0.0335967	1_day_old
GATCCAAA_ACATTCGT_TAACGATT_GTCACGTC	129	4613	0.0279644	1_day_old
GATCCAAA_ACCGGCCC_TAACGATT_TTACGCCG	226	7310	0.0309166	1_day_old
GATCCAAA_ATCGAATG_TAACGATT_GTCACGTC	178	5538	0.0321416	1_day_old
GATCCAAA_ATTGGGTC_AAGGAATC_CCATTGTG	357	12663	0.0281924	1_day_old
GATCCAAA_CCTTATGT_AAGGAATC_CCATTGTG	181	6162	0.0293736	1_day_old
GATCCAAA_CGCCAGAT_ATGTAGAC_AATAACGT	357	14141	0.0252457	1_day_old
GATCCAAA_CGCCAGAT_TAACGATT_CCATTGTG	106	2864	0.0370112	1_day_old
GATCCAAA_GAACTCGA_ATGTAGAC_AATAACGT	16	598	0.0267559	1_day_old
GATCCAAA_GATTCCCA_TAACGATT_GCGGTTAA	122	3869	0.0315327	1_day_old
GATCCAAA_GCAGCCTC_TAACGATT_TTACGCCG	499	13656	0.0365407	1_day_old
GATCCAAA_GCATTAAG_ATGTAGAC_CCATTGTG	122	4625	0.0263784	1_day_old
GATCCAAA_GCCCACGT_AAGGAATC_CCATTGTG	15	129	0.116279	1_day_old
GATCCAAA_GGCACGGA_ATGTAGAC_GTCACGTC	231	6727	0.0343392	1_day_old
GATCCAAA_GGGCTTGG_TAACGATT_CCATTGTG	103	4208	0.0244772	1_day_old
GATCCAAA_GTAAGGAG_GTCCTTCG_GCGGTTAA	198	5777	0.0342738	1_day_old
GATCCAAA_TAACCAAG_ATGTAGAC_TGCGAAGT	308	11393	0.0270341	1_day_old
GATCCAAA_TAACCAAG_TAACGATT_CGGCGACA	103	2849	0.036153	1_day_old
GATCCAAA_TAAGTTAC_TAACGATT_AATTCTAA	79	3228	0.0244734	1_day_old
GATCCAAA_TACTGACC_GTCCTTCG_TGCGAAGT	55	2202	0.0249773	1_day_old
GATCCAAA_TCAAGAGC_AAGGAATC_CCATTGTG	245	8328	0.0294188	1_day_old
GATCCAAA_TCACATGG_ATGTAGAC_CGGCGACA	181	5738	0.0315441	1_day_old
GATCCAAA_TCACATGG_TAACGATT_AATTCTAA	252	9112	0.0276558	1_day_old
GATCCAAA_TCCGAGTT_ATGTAGAC_CCATTGTG	177	9920	0.0178427	1_day_old
GATCCAAA_TGATGAAA_TAACGATT_GCGGTTAA	73	2559	0.0285268	1_day_old
GATCCAAA_TGTTCCTG_AAGGAATC_GTCACGTC	274	8537	0.0320956	1_day_old
GATCCAAA_TTCGTGCA_AAGGAATC_TGCGAAGT	151	3217	0.0469381	1_day_old
GATCCAAA_TTCGTGCA_TAACGATT_CGGCGACA	105	3812	0.0275446	1_day_old
GATCCAAA_TTGCCTAA_AAGGAATC_CGGCGACA	224	7507	0.0298388	1_day_old
GCGTTAAA_ACATTCGT_AAGGAATC_AATAACGT	246	11567	0.0212674	1_day_old
GCGTTAAA_ACATTCGT_AAGGAATC_CCATTGTG	276	9529	0.0289642	1_day_old
GCGTTAAA_ACTGCATA_AAGGAATC_CCATTGTG	454	19893	0.0228221	1_day_old
GCGTTAAA_ACTTAGAA_ATGTAGAC_GTCACGTC	370	12423	0.0297835	1_day_old
GCGTTAAA_ACTTGTTG_TAACGATT_CCATTGTG	132	5346	0.0246914	1_day_old
GCGTTAAA_AGAGTAGA_TAACGATT_TTACGCCG	125	5330	0.0234522	1_day_old
GCGTTAAA_CCCTTGGA_AAGGAATC_TTACGCCG	15	827	0.0181378	1_day_old
GCGTTAAA_CCCTTGGA_GTCCTTCG_TTACGCCG	40	1745	0.0229226	1_day_old
GCGTTAAA_CGCCAGAT_ATGTAGAC_CGGCGACA	9	712	0.0126404	1_day_old
GCGTTAAA_CGTACCAA_AAGGAATC_TTACGCCG	121	6107	0.0198133	1_day_old
GCGTTAAA_CGTACCAA_GTCCTTCG_GCGGTTAA	460	15974	0.0287968	1_day_old
GCGTTAAA_CGTAGACC_AAGGAATC_GCGGTTAA	53	3580	0.0148045	1_day_old
GCGTTAAA_CTCTCTAT_ATGTAGAC_GCGGTTAA	161	5241	0.0307193	1_day_old
GCGTTAAA_GCATTAAG_AAGGAATC_GCGGTTAA	299	10475	0.0285442	1_day_old
GCGTTAAA_GGGCTTGG_ATGTAGAC_GTCACGTC	79	2355	0.0335456	1_day_old
GCGTTAAA_GGTTCAAT_AAGGAATC_AATTCTAA	70	3063	0.0228534	1_day_old
GCGTTAAA_GTAAGGAG_GTCCTTCG_TGCGAAGT	86	2590	0.0332046	1_day_old
GCGTTAAA_TACTGACC_GTCCTTCG_TTACGCCG	285	12153	0.023451	1_day_old
GCGTTAAA_TCAAGAGC_AAGGAATC_AATAACGT	166	7131	0.0232786	1_day_old
GCGTTAAA_TCCATCAA_GTCCTTCG_AATTCTAA	212	9114	0.0232609	1_day_old
GCGTTAAA_TCCGAGTT_AAGGAATC_AATAACGT	280	12819	0.0218426	1_day_old
GCGTTAAA_TCCGAGTT_GTCCTTCG_TGCGAAGT	93	3321	0.0280036	1_day_old
GCGTTAAA_TGATTGTT_TAACGATT_TTACGCCG	118	4806	0.0245526	1_day_old
GCGTTAAA_TTAACTTG_TAACGATT_AATAACGT	242	7789	0.0310695	1_day_old
GCTACGCT_AACATGAT_GTCCTTCG_AATAACGT	189	6529	0.0289478	1_day_old
GCTACGCT_AATCTACA_AAGGAATC_CCATTGTG	4	141	0.0283688	1_day_old
GCTACGCT_ACATTCGT_GTCCTTCG_AATTCTAA	113	5374	0.0210272	1_day_old
GCTACGCT_ACCGGCCC_ATGTAGAC_GTCACGTC	157	6424	0.0244396	1_day_old
GCTACGCT_ACTGCATA_AAGGAATC_GCGGTTAA	9	125	0.072	1_day_old
GCTACGCT_AGAGTAGA_ATGTAGAC_AATTCTAA	19	819	0.023199	1_day_old
GCTACGCT_AGCCGTTC_AAGGAATC_CCATTGTG	133	3914	0.0339806	1_day_old
GCTACGCT_AGGTTGCC_TAACGATT_CGGCGACA	19	899	0.0211346	1_day_old
GCTACGCT_ATCGAATG_ATGTAGAC_AATAACGT	735	19053	0.0385766	1_day_old
GCTACGCT_ATCGAATG_GTCCTTCG_CGGCGACA	6	191	0.0314136	1_day_old
GCTACGCT_CAGCAACG_ATGTAGAC_CGGCGACA	104	2112	0.0492424	1_day_old
GCTACGCT_CGCCAGAT_ATGTAGAC_GCGGTTAA	25	730	0.0342466	1_day_old
GCTACGCT_CGTACCAA_GTCCTTCG_GCGGTTAA	7	128	0.0546875	1_day_old
GCTACGCT_CGTACCAA_TAACGATT_AATTCTAA	124	4017	0.0308688	1_day_old
GCTACGCT_CTTTAACA_AAGGAATC_AATAACGT	323	8556	0.0377513	1_day_old
GCTACGCT_GATTCCCA_AAGGAATC_CCATTGTG	15	246	0.0609756	1_day_old
GCTACGCT_GCAAATTT_TAACGATT_AATAACGT	256	7772	0.0329388	1_day_old
GCTACGCT_GCAGCCTC_AAGGAATC_CGGCGACA	49	2529	0.0193752	1_day_old
GCTACGCT_GCAGCCTC_ATGTAGAC_TTACGCCG	4	129	0.0310078	1_day_old
GCTACGCT_GCATTAAG_AAGGAATC_TGCGAAGT	51	1907	0.0267436	1_day_old
GCTACGCT_GGGCTTGG_GTCCTTCG_CGGCGACA	59	731	0.0807114	1_day_old
GCTACGCT_GTAAGGAG_ATGTAGAC_AATAACGT	243	5564	0.0436736	1_day_old
GCTACGCT_GTCGGACT_GTCCTTCG_CGGCGACA	225	7886	0.0285316	1_day_old
GCTACGCT_TAACCAAG_AAGGAATC_CCATTGTG	444	15021	0.0295586	1_day_old
GCTACGCT_TCACATGG_AAGGAATC_CGGCGACA	72	1963	0.0366786	1_day_old
GCTACGCT_TGGGCGGT_GTCCTTCG_AATAACGT	59	2744	0.0215015	1_day_old
GCTACGCT_TGTTCCTG_GTCCTTCG_GCGGTTAA	9	218	0.0412844	1_day_old
GCTACGCT_TTCGTGCA_GTCCTTCG_CGGCGACA	461	14406	0.0320006	1_day_old
GCTACGCT_TTGCCTAA_AAGGAATC_GTCACGTC	528	12850	0.0410895	1_day_old
GCTACGCT_TTTCTAGC_GTCCTTCG_TGCGAAGT	52	3407	0.0152627	1_day_old
GGACTCCT_AACATGAT_TAACGATT_CGGCGACA	74	1553	0.0476497	1_day_old
GGACTCCT_AATCTACA_AAGGAATC_AATTCTAA	27	1241	0.0217566	1_day_old
GGACTCCT_ACTTAGAA_ATGTAGAC_TGCGAAGT	18	563	0.0319716	1_day_old
GGACTCCT_AGCCGTTC_AAGGAATC_TTACGCCG	21	653	0.0321593	1_day_old
GGACTCCT_AGGTTGCC_AAGGAATC_GTCACGTC	10	1248	0.00801282	1_day_old
GGACTCCT_AGTCCGAG_ATGTAGAC_CCATTGTG	23	1059	0.0217186	1_day_old
GGACTCCT_ATGGTCAT_ATGTAGAC_TGCGAAGT	5	703	0.00711238	1_day_old
GGACTCCT_ATGGTCAT_GTCCTTCG_GTCACGTC	114	3298	0.0345664	1_day_old
GGACTCCT_CCCTTGGA_ATGTAGAC_CGGCGACA	37	1302	0.0284178	1_day_old
GGACTCCT_CGTACCAA_GTCCTTCG_AATTCTAA	46	1633	0.028169	1_day_old
GGACTCCT_GAGACGTG_GTCCTTCG_AATAACGT	373	9611	0.0388097	1_day_old
GGACTCCT_GCATTAAG_AAGGAATC_AATTCTAA	43	1714	0.0250875	1_day_old
GGACTCCT_GCATTAAG_TAACGATT_TTACGCCG	409	10766	0.03799	1_day_old
GGACTCCT_GGGCTTGG_GTCCTTCG_CGGCGACA	15	166	0.0903614	1_day_old
GGACTCCT_GGTTCAAT_TAACGATT_CGGCGACA	10	545	0.0183486	1_day_old
GGACTCCT_TAACCAAG_GTCCTTCG_GCGGTTAA	41	2218	0.0184851	1_day_old
GGACTCCT_TACTGACC_AAGGAATC_TGCGAAGT	33	2251	0.0146602	1_day_old
GGACTCCT_TATCCTCT_GTCCTTCG_CGGCGACA	106	3385	0.0313146	1_day_old
GGACTCCT_TGATGAAA_ATGTAGAC_CCATTGTG	83	3150	0.0263492	1_day_old
GGACTCCT_TTGCCTAA_AAGGAATC_AATAACGT	309	10915	0.0283097	1_day_old
GGACTCCT_TTTCTAGC_TAACGATT_TTACGCCG	120	2682	0.0447427	1_day_old
GGAGTAAG_ACGCGCAG_AAGGAATC_CGGCGACA	118	6425	0.0183658	1_day_old
GGAGTAAG_AGGTTGCC_AAGGAATC_GCGGTTAA	201	6950	0.0289209	1_day_old
GGAGTAAG_ATGGTCAT_ATGTAGAC_AATAACGT	4	235	0.0170213	1_day_old
GGAGTAAG_ATTACCGT_GTCCTTCG_AATTCTAA	225	5173	0.0434951	1_day_old
GGAGTAAG_ATTGGGTC_TAACGATT_GTCACGTC	71	3137	0.0226331	1_day_old
GGAGTAAG_GCAAATTT_GTCCTTCG_TGCGAAGT	207	5401	0.0383262	1_day_old
GGAGTAAG_GCATTAAG_AAGGAATC_CCATTGTG	116	4685	0.0247599	1_day_old
GGAGTAAG_GGTGAAGG_AAGGAATC_TTACGCCG	7	122	0.057377	1_day_old
GGAGTAAG_TATTTGCG_AAGGAATC_GTCACGTC	156	6460	0.0241486	1_day_old
GGAGTAAG_TCCGAGTT_ATGTAGAC_AATAACGT	218	7897	0.0276054	1_day_old
GGAGTAAG_TGATGAAA_TAACGATT_AATTCTAA	107	3684	0.0290445	1_day_old
GGAGTAAG_TGTTCCTG_TAACGATT_CGGCGACA	182	7793	0.0233543	1_day_old
GGAGTAAG_TTCGTGCA_AAGGAATC_GCGGTTAA	459	16632	0.0275974	1_day_old
GGAGTAAG_TTTCTAGC_AAGGAATC_GCGGTTAA	477	21812	0.0218687	1_day_old
GGAGTAAG_TTTCTAGC_GTCCTTCG_AATTCTAA	464	16496	0.028128	1_day_old
GGCGTCGA_AACATGAT_GTCCTTCG_AATAACGT	369	10249	0.0360035	1_day_old
GGCGTCGA_ACATTCGT_ATGTAGAC_CGGCGACA	154	4839	0.0318248	1_day_old
GGCGTCGA_ACCGGCCC_GTCCTTCG_TTACGCCG	326	10106	0.0322581	1_day_old
GGCGTCGA_ACCGGCCC_TAACGATT_GTCACGTC	269	6884	0.0390761	1_day_old
GGCGTCGA_ACTGCATA_GTCCTTCG_TTACGCCG	339	9739	0.0348085	1_day_old
GGCGTCGA_AGAGATCT_AAGGAATC_TTACGCCG	10	190	0.0526316	1_day_old
GGCGTCGA_AGAGATCT_GTCCTTCG_GCGGTTAA	175	6935	0.0252343	1_day_old
GGCGTCGA_AGAGTAGA_ATGTAGAC_CCATTGTG	102	2422	0.042114	1_day_old
GGCGTCGA_AGCCGTTC_AAGGAATC_AATAACGT	76	2078	0.0365736	1_day_old
GGCGTCGA_AGGTTGCC_ATGTAGAC_TGCGAAGT	68	2327	0.0292222	1_day_old
GGCGTCGA_AGTCCGAG_AAGGAATC_TTACGCCG	81	1689	0.0479574	1_day_old
GGCGTCGA_ATCGAATG_GTCCTTCG_GCGGTTAA	152	6488	0.0234279	1_day_old
GGCGTCGA_CAGCAACG_AAGGAATC_TTACGCCG	10	222	0.045045	1_day_old
GGCGTCGA_CCTTATGT_AAGGAATC_GCGGTTAA	169	5825	0.0290129	1_day_old
GGCGTCGA_CCTTATGT_GTCCTTCG_CGGCGACA	324	10152	0.0319149	1_day_old
GGCGTCGA_CGATAGGG_GTCCTTCG_TTACGCCG	131	3751	0.034924	1_day_old
GGCGTCGA_CGGACTGC_AAGGAATC_TTACGCCG	226	7829	0.028867	1_day_old
GGCGTCGA_CTAAGCCT_ATGTAGAC_AATTCTAA	154	5597	0.0275147	1_day_old
GGCGTCGA_CTCTCTAT_TAACGATT_GCGGTTAA	114	3039	0.0375123	1_day_old
GGCGTCGA_GAACTCGA_GTCCTTCG_GCGGTTAA	152	5858	0.0259474	1_day_old
GGCGTCGA_GCAAATTT_AAGGAATC_AATAACGT	95	2777	0.0342096	1_day_old
GGCGTCGA_GCCCACGT_TAACGATT_TGCGAAGT	19	220	0.0863636	1_day_old
GGCGTCGA_GGCACGGA_GTCCTTCG_AATTCTAA	204	7985	0.0255479	1_day_old
GGCGTCGA_GGGCTTGG_GTCCTTCG_AATTCTAA	260	8808	0.0295186	1_day_old
GGCGTCGA_GGTGAAGG_AAGGAATC_GCGGTTAA	9	159	0.0566038	1_day_old
GGCGTCGA_TAGATCGC_GTCCTTCG_TTACGCCG	182	4785	0.0380355	1_day_old
GGCGTCGA_TATCCTCT_TAACGATT_CGGCGACA	60	2367	0.0253485	1_day_old
GGCGTCGA_TCAAGAGC_TAACGATT_CCATTGTG	82	2250	0.0364444	1_day_old
GGCGTCGA_TCACATGG_GTCCTTCG_TGCGAAGT	59	2104	0.0280418	1_day_old
GGCGTCGA_TCTGGCGA_GTCCTTCG_CGGCGACA	197	4234	0.0465281	1_day_old
GGCGTCGA_TTAACTTG_GTCCTTCG_AATTCTAA	748	21926	0.0341147	1_day_old
GGCGTCGA_TTCGTGCA_GTCCTTCG_CCATTGTG	168	5350	0.0314019	1_day_old
GGCGTCGA_TTGCCTAA_AAGGAATC_TTACGCCG	235	10169	0.0231095	1_day_old
GGCGTCGA_TTTCTAGC_AAGGAATC_GTCACGTC	172	7233	0.0237799	1_day_old
GGGAATGA_ACCGGCCC_AAGGAATC_CCATTGTG	226	6896	0.0327726	1_day_old
GGGAATGA_ACGATAAC_AAGGAATC_GCGGTTAA	514	17953	0.0286303	1_day_old
GGGAATGA_ACTTGTTG_TAACGATT_GCGGTTAA	9	211	0.042654	1_day_old
GGGAATGA_AGAGTAGA_AAGGAATC_CCATTGTG	190	6705	0.0283371	1_day_old
GGGAATGA_AGGTTGCC_TAACGATT_GTCACGTC	225	7050	0.0319149	1_day_old
GGGAATGA_ATTACCGT_ATGTAGAC_TGCGAAGT	105	3820	0.0274869	1_day_old
GGGAATGA_ATTACCGT_GTCCTTCG_TGCGAAGT	137	5238	0.026155	1_day_old
GGGAATGA_CCAGTTTA_AAGGAATC_GTCACGTC	5	720	0.00694444	1_day_old
GGGAATGA_CGATAGGG_ATGTAGAC_CCATTGTG	187	5249	0.0356258	1_day_old
GGGAATGA_CGCCAGAT_TAACGATT_CCATTGTG	94	3766	0.0249602	1_day_old
GGGAATGA_CGGACTGC_GTCCTTCG_AATTCTAA	337	11469	0.0293836	1_day_old
GGGAATGA_CTCTCTAT_ATGTAGAC_AATAACGT	267	9176	0.0290976	1_day_old
GGGAATGA_GGTGAAGG_AAGGAATC_TTACGCCG	7	121	0.0578512	1_day_old
GGGAATGA_TACTGACC_AAGGAATC_TGCGAAGT	107	4140	0.0258454	1_day_old
GGGAATGA_TCCGAGTT_ATGTAGAC_TGCGAAGT	112	4305	0.0260163	1_day_old
GGGAATGA_TCCGAGTT_TAACGATT_AATAACGT	8	152	0.0526316	1_day_old
GGGAATGA_TCTGGCGA_GTCCTTCG_TTACGCCG	33	483	0.068323	1_day_old
GGGAATGA_TGCATACT_GTCCTTCG_AATAACGT	267	8567	0.0311661	1_day_old
GGGAATGA_TGGGCGGT_ATGTAGAC_GCGGTTAA	260	8286	0.0313782	1_day_old
GGGAATGA_TTCGTGCA_ATGTAGAC_CCATTGTG	152	3975	0.038239	1_day_old
GGGAATGA_TTCGTGCA_TAACGATT_TTACGCCG	526	15613	0.0336899	1_day_old
GGTAAACC_AATCTACA_TAACGATT_GCGGTTAA	87	3581	0.0242949	1_day_old
GGTAAACC_ACGCGCAG_ATGTAGAC_CCATTGTG	136	4567	0.0297788	1_day_old
GGTAAACC_ACGCGCAG_GTCCTTCG_CCATTGTG	75	777	0.0965251	1_day_old
GGTAAACC_ACTTAGAA_TAACGATT_CGGCGACA	97	3497	0.0277381	1_day_old
GGTAAACC_ATCGAATG_TAACGATT_GCGGTTAA	114	4465	0.0255319	1_day_old
GGTAAACC_CCCTTGGA_GTCCTTCG_TTACGCCG	24	199	0.120603	1_day_old
GGTAAACC_CCTTATGT_AAGGAATC_AATAACGT	258	9449	0.0273045	1_day_old
GGTAAACC_CGATAGGG_ATGTAGAC_CGGCGACA	42	653	0.0643185	1_day_old
GGTAAACC_CGCCAGAT_TAACGATT_TTACGCCG	222	6872	0.032305	1_day_old
GGTAAACC_CGTAGACC_AAGGAATC_TTACGCCG	240	6102	0.0393314	1_day_old
GGTAAACC_CTAGAAGT_GTCCTTCG_TTACGCCG	296	10797	0.027415	1_day_old
GGTAAACC_GATCATTC_TAACGATT_GCGGTTAA	133	3651	0.0364284	1_day_old
GGTAAACC_GCAAATTT_ATGTAGAC_TGCGAAGT	98	3661	0.0267686	1_day_old
GGTAAACC_GCAGCCTC_TAACGATT_CGGCGACA	63	2101	0.0299857	1_day_old
GGTAAACC_GCATTAAG_ATGTAGAC_CGGCGACA	410	16933	0.0242131	1_day_old
GGTAAACC_GCATTAAG_GTCCTTCG_GTCACGTC	333	10749	0.0309796	1_day_old
GGTAAACC_GGCACGGA_TAACGATT_AATTCTAA	83	2580	0.0321705	1_day_old
GGTAAACC_GGGCTTGG_AAGGAATC_TGCGAAGT	229	7879	0.0290646	1_day_old
GGTAAACC_GGTGAAGG_ATGTAGAC_AATTCTAA	151	4553	0.0331649	1_day_old
GGTAAACC_GGTTCAAT_TAACGATT_CGGCGACA	53	2906	0.0182381	1_day_old
GGTAAACC_GTGTATCG_GTCCTTCG_GCGGTTAA	288	8560	0.0336449	1_day_old
GGTAAACC_TAACCAAG_TAACGATT_CGGCGACA	170	6891	0.0246699	1_day_old
GGTAAACC_TAAGTTAC_ATGTAGAC_TTACGCCG	204	9177	0.0222295	1_day_old
GGTAAACC_TACTGACC_TAACGATT_AATAACGT	224	7055	0.0317505	1_day_old
GGTAAACC_TATCCTCT_AAGGAATC_CCATTGTG	134	4600	0.0291304	1_day_old
GGTAAACC_TGATGAAA_GTCCTTCG_TTACGCCG	274	9700	0.0282474	1_day_old
GGTAAACC_TGATGAAA_TAACGATT_AATTCTAA	158	3773	0.0418765	1_day_old
GGTAAACC_TGCATACT_AAGGAATC_TGCGAAGT	149	4845	0.0307534	1_day_old
GGTAAACC_TTCGTGCA_TAACGATT_AATAACGT	120	3250	0.0369231	1_day_old
GGTCATTT_ACATTCGT_ATGTAGAC_CGGCGACA	205	6502	0.0315288	1_day_old
GGTCATTT_ACGCGCAG_GTCCTTCG_CCATTGTG	83	888	0.0934685	1_day_old
GGTCATTT_ACTGCATA_GTCCTTCG_TGCGAAGT	47	1206	0.0389718	1_day_old
GGTCATTT_AGAGTAGA_ATGTAGAC_AATTCTAA	67	2361	0.0283778	1_day_old
GGTCATTT_ATCCAGGA_AAGGAATC_TTACGCCG	15	134	0.11194	1_day_old
GGTCATTT_ATGGTCAT_ATGTAGAC_TTACGCCG	325	9192	0.0353568	1_day_old
GGTCATTT_ATTACCGT_GTCCTTCG_AATTCTAA	487	14327	0.0339918	1_day_old
GGTCATTT_ATTACCGT_GTCCTTCG_GTCACGTC	809	31077	0.0260321	1_day_old
GGTCATTT_ATTGGGTC_TAACGATT_AATTCTAA	155	6240	0.0248397	1_day_old
GGTCATTT_CCCTTGGA_GTCCTTCG_TTACGCCG	17	207	0.0821256	1_day_old
GGTCATTT_CCTGCGGG_AAGGAATC_TTACGCCG	9	147	0.0612245	1_day_old
GGTCATTT_CGATAGGG_AAGGAATC_AATTCTAA	32	335	0.0955224	1_day_old
GGTCATTT_CGATAGGG_ATGTAGAC_CGGCGACA	40	752	0.0531915	1_day_old
GGTCATTT_CGGACTGC_GTCCTTCG_AATAACGT	297	12586	0.0235976	1_day_old
GGTCATTT_GAACTCGA_TAACGATT_AATTCTAA	142	7029	0.020202	1_day_old
GGTCATTT_GAGACGTG_ATGTAGAC_CCATTGTG	122	3231	0.0377592	1_day_old
GGTCATTT_GATCATTC_AAGGAATC_AATTCTAA	354	12697	0.0278806	1_day_old
GGTCATTT_GATTCCCA_AAGGAATC_TTACGCCG	661	28490	0.0232011	1_day_old
GGTCATTT_GGGCTTGG_TAACGATT_TTACGCCG	469	15678	0.0299145	1_day_old
GGTCATTT_GTAAGGAG_TAACGATT_CGGCGACA	40	2764	0.0144718	1_day_old
GGTCATTT_GTGTATCG_ATGTAGAC_GTCACGTC	151	5501	0.0274496	1_day_old
GGTCATTT_TAAGTTAC_GTCCTTCG_TTACGCCG	366	16410	0.0223035	1_day_old
GGTCATTT_TCCGAGTT_GTCCTTCG_TTACGCCG	970	26368	0.036787	1_day_old
GGTCATTT_TCTGGCGA_AAGGAATC_GCGGTTAA	66	2588	0.0255023	1_day_old
GGTCATTT_TGATGAAA_ATGTAGAC_AATAACGT	191	7134	0.0267732	1_day_old
GGTCATTT_TGGGCGGT_ATGTAGAC_GCGGTTAA	593	19888	0.029817	1_day_old
GGTCATTT_TGTTCCTG_GTCCTTCG_AATAACGT	284	11070	0.0256549	1_day_old
GGTCATTT_TTAACTTG_GTCCTTCG_GCGGTTAA	133	4702	0.0282858	1_day_old
GGTCATTT_TTCGTGCA_GTCCTTCG_TTACGCCG	279	6485	0.0430224	1_day_old
GGTCATTT_TTCGTGCA_TAACGATT_CGGCGACA	50	1523	0.0328299	1_day_old
GTAGAGGA_AACATGAT_GTCCTTCG_AATTCTAA	28	856	0.0327103	1_day_old
GTAGAGGA_AATCTACA_TAACGATT_AATTCTAA	205	5017	0.0408611	1_day_old
GTAGAGGA_ACATTCGT_TAACGATT_AATTCTAA	7	397	0.0176322	1_day_old
GTAGAGGA_ACCGGCCC_AAGGAATC_AATAACGT	29	1647	0.0176078	1_day_old
GTAGAGGA_ACGATAAC_AAGGAATC_AATAACGT	585	15866	0.0368713	1_day_old
GTAGAGGA_ACGATAAC_AAGGAATC_TGCGAAGT	500	15571	0.032111	1_day_old
GTAGAGGA_ACTTAGAA_GTCCTTCG_TTACGCCG	393	15573	0.025236	1_day_old
GTAGAGGA_ATCGAATG_GTCCTTCG_GCGGTTAA	209	8082	0.0258599	1_day_old
GTAGAGGA_ATTACCGT_GTCCTTCG_TTACGCCG	336	10313	0.0325802	1_day_old
GTAGAGGA_CCCTTGGA_TAACGATT_GTCACGTC	351	11317	0.0310153	1_day_old
GTAGAGGA_CCTTATGT_AAGGAATC_GTCACGTC	327	14976	0.0218349	1_day_old
GTAGAGGA_CCTTATGT_ATGTAGAC_TGCGAAGT	102	2856	0.0357143	1_day_old
GTAGAGGA_CGTACCAA_GTCCTTCG_AATAACGT	8	231	0.034632	1_day_old
GTAGAGGA_CGTACCAA_GTCCTTCG_TGCGAAGT	169	5223	0.0323569	1_day_old
GTAGAGGA_GACGTGGC_GTCCTTCG_GCGGTTAA	245	11127	0.0220185	1_day_old
GTAGAGGA_GAGACGTG_AAGGAATC_TTACGCCG	180	6907	0.0260605	1_day_old
GTAGAGGA_GCAAATTT_TAACGATT_AATAACGT	1106	28675	0.0385702	1_day_old
GTAGAGGA_GCATTAAG_GTCCTTCG_AATTCTAA	207	11028	0.0187704	1_day_old
GTAGAGGA_GCATTAAG_TAACGATT_TGCGAAGT	10	926	0.0107991	1_day_old
GTAGAGGA_GGTGAAGG_AAGGAATC_TTACGCCG	56	1826	0.0306681	1_day_old
GTAGAGGA_GTCGGACT_GTCCTTCG_AATTCTAA	19	407	0.046683	1_day_old
GTAGAGGA_GTGTATCG_ATGTAGAC_CGGCGACA	114	3912	0.0291411	1_day_old
GTAGAGGA_TAACCAAG_ATGTAGAC_GTCACGTC	31	732	0.0423497	1_day_old
GTAGAGGA_TAACCAAG_GTCCTTCG_GCGGTTAA	20	774	0.0258398	1_day_old
GTAGAGGA_TAAGTTAC_TAACGATT_GTCACGTC	119	3598	0.0330739	1_day_old
GTAGAGGA_TACTGACC_TAACGATT_AATTCTAA	10	421	0.023753	1_day_old
GTAGAGGA_TAGATCGC_AAGGAATC_GTCACGTC	164	6679	0.0245546	1_day_old
GTAGAGGA_TGATGAAA_AAGGAATC_TGCGAAGT	9	507	0.0177515	1_day_old
GTAGAGGA_TGGGCGGT_GTCCTTCG_AATAACGT	282	8567	0.032917	1_day_old
GTAGAGGA_TTAACTTG_GTCCTTCG_TTACGCCG	344	9292	0.0370211	1_day_old
GTAGAGGA_TTGCCTAA_AAGGAATC_TTACGCCG	193	8433	0.0228863	1_day_old
GTAGAGGA_TTTCTAGC_AAGGAATC_AATAACGT	10	547	0.0182815	1_day_old
GTATTCGG_ACTTGTTG_TAACGATT_CGGCGACA	51	1357	0.0375829	1_day_old
GTATTCGG_AGGTTGCC_AAGGAATC_AATTCTAA	250	7991	0.0312852	1_day_old
GTATTCGG_CCTGCGGG_AAGGAATC_TTACGCCG	19	346	0.0549133	1_day_old
GTATTCGG_CCTGCGGG_TAACGATT_CGGCGACA	41	423	0.0969267	1_day_old
GTATTCGG_CCTTATGT_AAGGAATC_TTACGCCG	162	5134	0.0315543	1_day_old
GTATTCGG_CTAAGCCT_GTCCTTCG_GTCACGTC	258	9264	0.0278497	1_day_old
GTATTCGG_GACGTGGC_AAGGAATC_AATAACGT	93	2389	0.0389284	1_day_old
GTATTCGG_GATTCCCA_TAACGATT_CGGCGACA	8	730	0.0109589	1_day_old
GTATTCGG_GATTCCCA_TAACGATT_TTACGCCG	90	2586	0.0348028	1_day_old
GTATTCGG_GCAAATTT_GTCCTTCG_GTCACGTC	454	12665	0.0358468	1_day_old
GTATTCGG_GCAAATTT_GTCCTTCG_TGCGAAGT	148	3014	0.0491042	1_day_old
GTATTCGG_GGTTCAAT_TAACGATT_AATAACGT	219	7523	0.0291107	1_day_old
GTATTCGG_GTCGGACT_TAACGATT_AATAACGT	35	1134	0.0308642	1_day_old
GTATTCGG_GTGTATCG_AAGGAATC_TTACGCCG	65	970	0.0670103	1_day_old
GTATTCGG_GTGTATCG_TAACGATT_CGGCGACA	101	1908	0.052935	1_day_old
GTATTCGG_TAGATCGC_AAGGAATC_GCGGTTAA	184	8581	0.0214427	1_day_old
GTATTCGG_TAGATCGC_GTCCTTCG_TTACGCCG	239	7175	0.0333101	1_day_old
GTATTCGG_TCAAGAGC_TAACGATT_AATAACGT	25	883	0.0283126	1_day_old
GTATTCGG_TCCATCAA_ATGTAGAC_AATAACGT	8	1201	0.00666112	1_day_old
GTATTCGG_TCCATCAA_GTCCTTCG_CGGCGACA	16	1054	0.0151803	1_day_old
GTATTCGG_TGATGAAA_AAGGAATC_AATTCTAA	10	133	0.075188	1_day_old
GTATTCGG_TGCATACT_AAGGAATC_AATTCTAA	189	4482	0.0421687	1_day_old
GTATTCGG_TGCATACT_GTCCTTCG_TGCGAAGT	85	3052	0.0278506	1_day_old
GTATTCGG_TGCATACT_TAACGATT_CGGCGACA	74	1810	0.040884	1_day_old
GTGATAGC_AAGGAGTA_AAGGAATC_CCATTGTG	19	1055	0.0180095	1_day_old
GTGATAGC_AAGGAGTA_TAACGATT_GTCACGTC	68	2007	0.0338814	1_day_old
GTGATAGC_ACATTCGT_ATGTAGAC_AATAACGT	86	2258	0.0380868	1_day_old
GTGATAGC_ACATTCGT_TAACGATT_CGGCGACA	67	5447	0.0123003	1_day_old
GTGATAGC_ACTTGTTG_TAACGATT_GCGGTTAA	10	137	0.0729927	1_day_old
GTGATAGC_AGCCGTTC_TAACGATT_GTCACGTC	82	3036	0.0270092	1_day_old
GTGATAGC_ATCCAGGA_GTCCTTCG_GCGGTTAA	156	5085	0.0306785	1_day_old
GTGATAGC_ATTGGGTC_GTCCTTCG_GTCACGTC	175	7239	0.0241746	1_day_old
GTGATAGC_CAGCAACG_AAGGAATC_TGCGAAGT	108	3047	0.0354447	1_day_old
GTGATAGC_CGCCAGAT_ATGTAGAC_GCGGTTAA	178	4566	0.0389838	1_day_old
GTGATAGC_CGTACCAA_TAACGATT_AATAACGT	253	4868	0.0519721	1_day_old
GTGATAGC_CTAAGCCT_AAGGAATC_CGGCGACA	14	406	0.0344828	1_day_old
GTGATAGC_CTAAGCCT_TAACGATT_GTCACGTC	13	493	0.0263692	1_day_old
GTGATAGC_GAACTCGA_TAACGATT_CCATTGTG	150	4209	0.0356379	1_day_old
GTGATAGC_GACGTGGC_AAGGAATC_AATTCTAA	380	11065	0.0343425	1_day_old
GTGATAGC_GATTCCCA_ATGTAGAC_AATAACGT	229	10960	0.0208942	1_day_old
GTGATAGC_GGGCTTGG_GTCCTTCG_GCGGTTAA	675	18213	0.0370614	1_day_old
GTGATAGC_GGGCTTGG_GTCCTTCG_GTCACGTC	173	6296	0.0274778	1_day_old
GTGATAGC_GGTGAAGG_AAGGAATC_TTACGCCG	32	575	0.0556522	1_day_old
GTGATAGC_GTGTATCG_ATGTAGAC_CGGCGACA	60	2203	0.0272356	1_day_old
GTGATAGC_TATCCTCT_TAACGATT_AATAACGT	92	4225	0.0217751	1_day_old
GTGATAGC_TCAAGAGC_ATGTAGAC_AATTCTAA	191	5487	0.0348095	1_day_old
GTGATAGC_TCCGAGTT_TAACGATT_GTCACGTC	91	2880	0.0315972	1_day_old
GTGATAGC_TCTGGCGA_AAGGAATC_GTCACGTC	121	2811	0.0430452	1_day_old
GTGATAGC_TCTGGCGA_GTCCTTCG_GCGGTTAA	159	5306	0.0299661	1_day_old
GTGATAGC_TGATGAAA_ATGTAGAC_CCATTGTG	112	3904	0.0286885	1_day_old
GTGATAGC_TGCATACT_AAGGAATC_TGCGAAGT	67	2318	0.0289042	1_day_old
GTGTGGTG_AAGGAGTA_GTCCTTCG_TGCGAAGT	93	2663	0.034923	1_day_old
GTGTGGTG_AATCTACA_AAGGAATC_AATAACGT	589	18946	0.0310884	1_day_old
GTGTGGTG_ACTTGTTG_ATGTAGAC_GCGGTTAA	299	8818	0.0339079	1_day_old
GTGTGGTG_AGCCGTTC_GTCCTTCG_AATAACGT	86	2267	0.0379356	1_day_old
GTGTGGTG_ATCCAGGA_TAACGATT_AATTCTAA	102	4354	0.0234267	1_day_old
GTGTGGTG_ATGGTCAT_AAGGAATC_CGGCGACA	220	8072	0.0272547	1_day_old
GTGTGGTG_CAGCAACG_ATGTAGAC_CGGCGACA	142	4429	0.0320614	1_day_old
GTGTGGTG_CCAGTTTA_ATGTAGAC_AATTCTAA	91	3766	0.0241636	1_day_old
GTGTGGTG_CCTTATGT_GTCCTTCG_AATAACGT	192	8425	0.0227893	1_day_old
GTGTGGTG_CCTTATGT_TAACGATT_CCATTGTG	69	2435	0.0283368	1_day_old
GTGTGGTG_CGATAGGG_TAACGATT_CGGCGACA	88	2235	0.0393736	1_day_old
GTGTGGTG_CGGACTGC_GTCCTTCG_CCATTGTG	148	4369	0.033875	1_day_old
GTGTGGTG_CTAGAAGT_GTCCTTCG_CGGCGACA	256	11231	0.0227941	1_day_old
GTGTGGTG_GAACTCGA_AAGGAATC_GTCACGTC	436	19678	0.0221567	1_day_old
GTGTGGTG_GACGTGGC_AAGGAATC_TGCGAAGT	93	3308	0.0281137	1_day_old
GTGTGGTG_GACGTGGC_ATGTAGAC_TTACGCCG	125	4070	0.0307125	1_day_old
GTGTGGTG_GCAAATTT_TAACGATT_AATAACGT	191	5670	0.0336861	1_day_old
GTGTGGTG_GCAAATTT_TAACGATT_TGCGAAGT	23	712	0.0323034	1_day_old
GTGTGGTG_GCAGCCTC_AAGGAATC_GTCACGTC	237	10163	0.0233199	1_day_old
GTGTGGTG_GGGCTTGG_GTCCTTCG_AATTCTAA	129	5183	0.0248891	1_day_old
GTGTGGTG_GGTTCAAT_GTCCTTCG_TGCGAAGT	88	2898	0.0303658	1_day_old
GTGTGGTG_GTGTATCG_TAACGATT_CCATTGTG	123	3542	0.0347261	1_day_old
GTGTGGTG_TAAGTTAC_AAGGAATC_TTACGCCG	166	5468	0.0303584	1_day_old
GTGTGGTG_TACTGACC_AAGGAATC_AATAACGT	363	9501	0.0382065	1_day_old
GTGTGGTG_TACTGACC_ATGTAGAC_AATTCTAA	215	9794	0.0219522	1_day_old
GTGTGGTG_TCTGGCGA_GTCCTTCG_CGGCGACA	83	4075	0.0203681	1_day_old
GTTAACAG_AACATGAT_GTCCTTCG_AATAACGT	10	305	0.0327869	1_day_old
GTTAACAG_AATCTACA_TAACGATT_AATAACGT	108	4366	0.0247366	1_day_old
GTTAACAG_ACATTCGT_TAACGATT_AATTCTAA	62	3138	0.0197578	1_day_old
GTTAACAG_ACGCGCAG_TAACGATT_GTCACGTC	103	2377	0.0433319	1_day_old
GTTAACAG_ACTTGTTG_ATGTAGAC_TTACGCCG	412	12848	0.0320672	1_day_old
GTTAACAG_AGCCGTTC_TAACGATT_TTACGCCG	168	6811	0.024666	1_day_old
GTTAACAG_AGGTTGCC_ATGTAGAC_AATTCTAA	746	22223	0.0335688	1_day_old
GTTAACAG_AGGTTGCC_ATGTAGAC_GTCACGTC	259	7291	0.0355232	1_day_old
GTTAACAG_AGGTTGCC_TAACGATT_AATAACGT	150	5516	0.0271936	1_day_old
GTTAACAG_AGTCCGAG_AAGGAATC_TGCGAAGT	102	3954	0.0257967	1_day_old
GTTAACAG_AGTCCGAG_AAGGAATC_TTACGCCG	59	1320	0.044697	1_day_old
GTTAACAG_AGTCCGAG_TAACGATT_AATTCTAA	222	5386	0.041218	1_day_old
GTTAACAG_ATCGAATG_GTCCTTCG_AATAACGT	5	171	0.0292398	1_day_old
GTTAACAG_ATCGAATG_TAACGATT_CCATTGTG	20	659	0.030349	1_day_old
GTTAACAG_ATTACCGT_AAGGAATC_TGCGAAGT	76	2157	0.0352341	1_day_old
GTTAACAG_ATTACCGT_GTCCTTCG_AATAACGT	150	6612	0.022686	1_day_old
GTTAACAG_CAGCAACG_ATGTAGAC_TTACGCCG	840	19350	0.0434109	1_day_old
GTTAACAG_CCAGTTTA_ATGTAGAC_TTACGCCG	180	6289	0.0286214	1_day_old
GTTAACAG_CCAGTTTA_GTCCTTCG_AATAACGT	269	11766	0.0228625	1_day_old
GTTAACAG_CGATAGGG_GTCCTTCG_TGCGAAGT	31	632	0.0490506	1_day_old
GTTAACAG_CTAAGCCT_GTCCTTCG_TTACGCCG	312	11484	0.0271682	1_day_old
GTTAACAG_CTAGAAGT_AAGGAATC_TTACGCCG	9	151	0.0596026	1_day_old
GTTAACAG_GAGACGTG_AAGGAATC_TGCGAAGT	79	2700	0.0292593	1_day_old
GTTAACAG_GCAGCCTC_ATGTAGAC_GCGGTTAA	190	4049	0.0469252	1_day_old
GTTAACAG_GCATTAAG_GTCCTTCG_AATTCTAA	353	14509	0.0243297	1_day_old
GTTAACAG_GCATTAAG_TAACGATT_AATTCTAA	143	5107	0.0280008	1_day_old
GTTAACAG_GGGCTTGG_AAGGAATC_AATTCTAA	149	5458	0.0272994	1_day_old
GTTAACAG_GGTGAAGG_AAGGAATC_AATAACGT	154	6162	0.0249919	1_day_old
GTTAACAG_GGTGAAGG_AAGGAATC_CCATTGTG	279	8027	0.0347577	1_day_old
GTTAACAG_TGTTCCTG_GTCCTTCG_GCGGTTAA	808	21075	0.0383393	1_day_old
GTTAACAG_TTAACTTG_ATGTAGAC_TTACGCCG	399	9465	0.0421553	1_day_old
GTTAACAG_TTTCTAGC_TAACGATT_CGGCGACA	66	2172	0.0303867	1_day_old
TAACAACA_AACATGAT_GTCCTTCG_GCGGTTAA	116	3511	0.033039	1_day_old
TAACAACA_AACATGAT_TAACGATT_TGCGAAGT	59	1931	0.0305541	1_day_old
TAACAACA_AAGGAGTA_GTCCTTCG_TGCGAAGT	188	6028	0.0311878	1_day_old
TAACAACA_ACTGCATA_AAGGAATC_GCGGTTAA	11	125	0.088	1_day_old
TAACAACA_CCAGTTTA_ATGTAGAC_GTCACGTC	76	2402	0.0316403	1_day_old
TAACAACA_CCAGTTTA_TAACGATT_CGGCGACA	33	1154	0.0285962	1_day_old
TAACAACA_CCCTTGGA_ATGTAGAC_GTCACGTC	212	7812	0.0271377	1_day_old
TAACAACA_GATCATTC_AAGGAATC_CGGCGACA	212	8196	0.0258663	1_day_old
TAACAACA_GATCATTC_AAGGAATC_TTACGCCG	218	8924	0.0244285	1_day_old
TAACAACA_GCATTAAG_ATGTAGAC_TTACGCCG	150	3378	0.044405	1_day_old
TAACAACA_GGGCTTGG_TAACGATT_GTCACGTC	86	2351	0.0365802	1_day_old
TAACAACA_GTGTATCG_AAGGAATC_GTCACGTC	40	1517	0.0263678	1_day_old
TAACAACA_TAACCAAG_ATGTAGAC_AATAACGT	603	20698	0.0291332	1_day_old
TAACAACA_TAACCAAG_GTCCTTCG_GTCACGTC	188	5976	0.0314592	1_day_old
TAACAACA_TAACCAAG_TAACGATT_TGCGAAGT	50	2445	0.0204499	1_day_old
TAACAACA_TAAGTTAC_AAGGAATC_AATTCTAA	222	8511	0.0260839	1_day_old
TAACAACA_TCCGAGTT_TAACGATT_GCGGTTAA	108	4661	0.023171	1_day_old
TAACAACA_TCTGGCGA_TAACGATT_TGCGAAGT	87	2550	0.0341176	1_day_old
TAACAACA_TGATGAAA_GTCCTTCG_CGGCGACA	149	4729	0.0315077	1_day_old
TAACAACA_TTAACTTG_AAGGAATC_CGGCGACA	77	1901	0.040505	1_day_old
TAACAACA_TTCGTGCA_AAGGAATC_GCGGTTAA	11	1833	0.00600109	1_day_old
TAACAACA_TTCGTGCA_AAGGAATC_GTCACGTC	213	7328	0.0290666	1_day_old
TAACAACA_TTCGTGCA_AAGGAATC_TTACGCCG	215	5783	0.0371779	1_day_old
TAACAACA_TTCGTGCA_ATGTAGAC_GTCACGTC	477	15803	0.0301841	1_day_old
TAACAACA_TTGCCTAA_TAACGATT_AATAACGT	167	5855	0.0285226	1_day_old
TAAGGCGA_AATCTACA_AAGGAATC_TTACGCCG	209	8611	0.0242713	1_day_old
TAAGGCGA_AATCTACA_TAACGATT_GCGGTTAA	45	1712	0.026285	1_day_old
TAAGGCGA_ACCGGCCC_AAGGAATC_TTACGCCG	303	11691	0.0259174	1_day_old
TAAGGCGA_ACTTGTTG_AAGGAATC_TTACGCCG	279	8843	0.0315504	1_day_old
TAAGGCGA_ATCGAATG_AAGGAATC_AATAACGT	12	243	0.0493827	1_day_old
TAAGGCGA_ATCGAATG_ATGTAGAC_GTCACGTC	14	440	0.0318182	1_day_old
TAAGGCGA_ATCGAATG_TAACGATT_TTACGCCG	83	996	0.0833333	1_day_old
TAAGGCGA_CAGCAACG_GTCCTTCG_TTACGCCG	358	13308	0.0269011	1_day_old
TAAGGCGA_CCAGTTTA_ATGTAGAC_GCGGTTAA	3	239	0.0125523	1_day_old
TAAGGCGA_CCTGCGGG_TAACGATT_GCGGTTAA	48	1521	0.0315582	1_day_old
TAAGGCGA_CGCCAGAT_AAGGAATC_CCATTGTG	178	8909	0.0199798	1_day_old
TAAGGCGA_CGCCAGAT_GTCCTTCG_CGGCGACA	233	8265	0.0281912	1_day_old
TAAGGCGA_CGGACTGC_GTCCTTCG_AATTCTAA	33	1022	0.0322896	1_day_old
TAAGGCGA_GAACTCGA_GTCCTTCG_AATAACGT	12	273	0.043956	1_day_old
TAAGGCGA_GATCATTC_ATGTAGAC_AATAACGT	8	191	0.0418848	1_day_old
TAAGGCGA_GCATTAAG_AAGGAATC_TGCGAAGT	175	6054	0.0289065	1_day_old
TAAGGCGA_GCATTAAG_ATGTAGAC_GCGGTTAA	99	4836	0.0204715	1_day_old
TAAGGCGA_GCATTAAG_ATGTAGAC_TTACGCCG	219	9404	0.023288	1_day_old
TAAGGCGA_GGGCTTGG_GTCCTTCG_CGGCGACA	128	8156	0.015694	1_day_old
TAAGGCGA_GGTGAAGG_ATGTAGAC_CGGCGACA	132	6016	0.0219415	1_day_old
TAAGGCGA_GGTGAAGG_TAACGATT_AATAACGT	374	10478	0.0356938	1_day_old
TAAGGCGA_GTAAGGAG_TAACGATT_CCATTGTG	82	2651	0.0309317	1_day_old
TAAGGCGA_GTCGGACT_GTCCTTCG_TGCGAAGT	38	2773	0.0137036	1_day_old
TAAGGCGA_GTCGGACT_TAACGATT_GTCACGTC	21	610	0.0344262	1_day_old
TAAGGCGA_TACTGACC_AAGGAATC_CCATTGTG	137	4047	0.0338522	1_day_old
TAAGGCGA_TACTGACC_ATGTAGAC_CGGCGACA	84	2515	0.0333996	1_day_old
TAAGGCGA_TACTGACC_TAACGATT_TTACGCCG	198	6637	0.0298328	1_day_old
TAAGGCGA_TATCCTCT_GTCCTTCG_TTACGCCG	71	3317	0.0214049	1_day_old
TAAGGCGA_TCCATCAA_ATGTAGAC_TGCGAAGT	8	506	0.0158103	1_day_old
TAAGGCGA_TCCGAGTT_GTCCTTCG_CCATTGTG	156	5698	0.027378	1_day_old
TAAGGCGA_TGATGAAA_GTCCTTCG_AATTCTAA	27	673	0.0401189	1_day_old
TAAGGCGA_TGATTGTT_AAGGAATC_CCATTGTG	54	1236	0.0436893	1_day_old
TAAGGCGA_TGGGCGGT_GTCCTTCG_TTACGCCG	289	9972	0.0289811	1_day_old
TAAGGCGA_TTTCTAGC_ATGTAGAC_TGCGAAGT	109	3814	0.0285789	1_day_old
TACACCTC_AATCTACA_AAGGAATC_CGGCGACA	72	1041	0.0691643	1_day_old
TACACCTC_AATCTACA_ATGTAGAC_AATTCTAA	23	635	0.0362205	1_day_old
TACACCTC_AATCTACA_GTCCTTCG_GCGGTTAA	161	2555	0.0630137	1_day_old
TACACCTC_AATCTACA_TAACGATT_CCATTGTG	55	1643	0.0334753	1_day_old
TACACCTC_ACATTCGT_AAGGAATC_CCATTGTG	189	6523	0.0289744	1_day_old
TACACCTC_ACATTCGT_TAACGATT_GCGGTTAA	194	6234	0.0311197	1_day_old
TACACCTC_ACCGGCCC_ATGTAGAC_AATAACGT	18	561	0.0320856	1_day_old
TACACCTC_ACCGGCCC_GTCCTTCG_CGGCGACA	22	570	0.0385965	1_day_old
TACACCTC_AGAGTAGA_GTCCTTCG_GCGGTTAA	175	7987	0.0219106	1_day_old
TACACCTC_AGTCCGAG_TAACGATT_GTCACGTC	117	3542	0.0330322	1_day_old
TACACCTC_ATCCAGGA_AAGGAATC_AATTCTAA	328	10288	0.0318818	1_day_old
TACACCTC_ATCCAGGA_GTCCTTCG_GCGGTTAA	10	133	0.075188	1_day_old
TACACCTC_ATGGTCAT_GTCCTTCG_GCGGTTAA	16	119	0.134454	1_day_old
TACACCTC_CCAGTTTA_TAACGATT_CGGCGACA	130	4883	0.026623	1_day_old
TACACCTC_CCTGCGGG_GTCCTTCG_GCGGTTAA	12	154	0.0779221	1_day_old
TACACCTC_CCTTATGT_AAGGAATC_GCGGTTAA	175	6229	0.0280944	1_day_old
TACACCTC_CGATAGGG_GTCCTTCG_GCGGTTAA	11	117	0.0940171	1_day_old
TACACCTC_CGCCAGAT_TAACGATT_TGCGAAGT	81	2185	0.0370709	1_day_old
TACACCTC_CGGACTGC_TAACGATT_GCGGTTAA	111	2891	0.038395	1_day_old
TACACCTC_CGTAGACC_AAGGAATC_GTCACGTC	146	4349	0.0335709	1_day_old
TACACCTC_CGTAGACC_ATGTAGAC_CGGCGACA	193	5639	0.0342259	1_day_old
TACACCTC_GAACTCGA_TAACGATT_AATAACGT	227	9270	0.0244876	1_day_old
TACACCTC_GACGTGGC_AAGGAATC_AATTCTAA	133	3152	0.0421954	1_day_old
TACACCTC_GATTCCCA_GTCCTTCG_GTCACGTC	185	5272	0.035091	1_day_old
TACACCTC_GCAAATTT_TAACGATT_TTACGCCG	142	3890	0.0365039	1_day_old
TACACCTC_GCAGCCTC_ATGTAGAC_TTACGCCG	14	134	0.104478	1_day_old
TACACCTC_GCAGCCTC_GTCCTTCG_CGGCGACA	146	6539	0.0223276	1_day_old
TACACCTC_GGTGAAGG_AAGGAATC_GTCACGTC	98	3310	0.0296073	1_day_old
TACACCTC_GGTGAAGG_TAACGATT_TTACGCCG	206	7567	0.0272235	1_day_old
TACACCTC_GTGTATCG_GTCCTTCG_GCGGTTAA	14	190	0.0736842	1_day_old
TACACCTC_TAACCAAG_GTCCTTCG_AATAACGT	14	442	0.0316742	1_day_old
TACACCTC_TAGATCGC_ATGTAGAC_GCGGTTAA	235	8209	0.0286271	1_day_old
TACACCTC_TGGGCGGT_GTCCTTCG_CGGCGACA	169	7998	0.0211303	1_day_old
TACACCTC_TGTTCCTG_GTCCTTCG_GCGGTTAA	10	150	0.0666667	1_day_old
TACTTGAA_ACTGCATA_AAGGAATC_TTACGCCG	422	13810	0.0305576	1_day_old
TACTTGAA_ACTTGTTG_AAGGAATC_TGCGAAGT	112	6763	0.0165607	1_day_old
TACTTGAA_AGAGATCT_AAGGAATC_CCATTGTG	17	148	0.114865	1_day_old
TACTTGAA_AGCCGTTC_AAGGAATC_TGCGAAGT	188	6290	0.0298887	1_day_old
TACTTGAA_AGTCCGAG_AAGGAATC_CCATTGTG	235	6168	0.0380999	1_day_old
TACTTGAA_ATCGAATG_TAACGATT_CCATTGTG	193	6994	0.0275951	1_day_old
TACTTGAA_ATGGTCAT_AAGGAATC_TTACGCCG	270	8636	0.0312645	1_day_old
TACTTGAA_ATTACCGT_AAGGAATC_AATAACGT	185	5961	0.0310351	1_day_old
TACTTGAA_CCCTTGGA_AAGGAATC_CGGCGACA	209	5500	0.038	1_day_old
TACTTGAA_CGATAGGG_AAGGAATC_CCATTGTG	241	12279	0.019627	1_day_old
TACTTGAA_CGATAGGG_ATGTAGAC_AATAACGT	342	7531	0.0454123	1_day_old
TACTTGAA_CGCCAGAT_ATGTAGAC_CCATTGTG	185	6337	0.0291936	1_day_old
TACTTGAA_CGCCAGAT_TAACGATT_TGCGAAGT	117	3459	0.0338248	1_day_old
TACTTGAA_CTAGAAGT_AAGGAATC_GCGGTTAA	141	5569	0.0253187	1_day_old
TACTTGAA_CTCTCTAT_ATGTAGAC_TGCGAAGT	58	2875	0.0201739	1_day_old
TACTTGAA_GGTGAAGG_AAGGAATC_TTACGCCG	8	167	0.0479042	1_day_old
TACTTGAA_GGTGAAGG_GTCCTTCG_CCATTGTG	206	6028	0.0341739	1_day_old
TACTTGAA_GGTTCAAT_GTCCTTCG_AATTCTAA	339	11671	0.0290464	1_day_old
TACTTGAA_GGTTCAAT_TAACGATT_GCGGTTAA	90	3031	0.0296932	1_day_old
TACTTGAA_GTAAGGAG_TAACGATT_AATAACGT	267	6711	0.0397854	1_day_old
TACTTGAA_GTCGGACT_AAGGAATC_GTCACGTC	195	7059	0.0276243	1_day_old
TACTTGAA_GTGTATCG_GTCCTTCG_GCGGTTAA	68	1284	0.0529595	1_day_old
TACTTGAA_TCCGAGTT_AAGGAATC_AATTCTAA	143	6589	0.0217028	1_day_old
TACTTGAA_TCTGGCGA_AAGGAATC_CGGCGACA	220	7890	0.0278834	1_day_old
TACTTGAA_TGATTGTT_GTCCTTCG_AATAACGT	509	13863	0.0367164	1_day_old
TACTTGAA_TGCATACT_GTCCTTCG_CCATTGTG	260	7409	0.0350925	1_day_old
TACTTGAA_TGTTCCTG_TAACGATT_GCGGTTAA	216	6157	0.035082	1_day_old
TACTTGAA_TTGCCTAA_GTCCTTCG_CGGCGACA	213	5121	0.0415934	1_day_old
TACTTGAA_TTGCCTAA_GTCCTTCG_GTCACGTC	299	11292	0.0264789	1_day_old
TACTTGAA_TTGCCTAA_GTCCTTCG_TGCGAAGT	158	4975	0.0317588	1_day_old
TAGGCATG_AAGGAGTA_GTCCTTCG_CCATTGTG	9	173	0.0520231	1_day_old
TAGGCATG_ACCGGCCC_AAGGAATC_CCATTGTG	63	3187	0.0197678	1_day_old
TAGGCATG_ACGCGCAG_GTCCTTCG_TTACGCCG	114	3246	0.0351201	1_day_old
TAGGCATG_ACTTAGAA_AAGGAATC_TTACGCCG	417	10848	0.0384403	1_day_old
TAGGCATG_AGAGTAGA_GTCCTTCG_GCGGTTAA	629	23959	0.0262532	1_day_old
TAGGCATG_ATGGTCAT_AAGGAATC_GCGGTTAA	44	1602	0.0274657	1_day_old
TAGGCATG_CAGCAACG_GTCCTTCG_TTACGCCG	407	13820	0.0294501	1_day_old
TAGGCATG_CCAGTTTA_AAGGAATC_TTACGCCG	90	5225	0.0172249	1_day_old
TAGGCATG_CCAGTTTA_GTCCTTCG_AATAACGT	7	188	0.037234	1_day_old
TAGGCATG_CCTGCGGG_GTCCTTCG_AATAACGT	7	133	0.0526316	1_day_old
TAGGCATG_CGTACCAA_ATGTAGAC_AATAACGT	349	9422	0.037041	1_day_old
TAGGCATG_CGTAGACC_GTCCTTCG_CCATTGTG	96	4593	0.0209014	1_day_old
TAGGCATG_CTAGAAGT_AAGGAATC_TTACGCCG	49	1287	0.038073	1_day_old
TAGGCATG_CTTTAACA_TAACGATT_AATAACGT	59	2659	0.0221888	1_day_old
TAGGCATG_GAACTCGA_GTCCTTCG_CCATTGTG	114	3369	0.0338379	1_day_old
TAGGCATG_GATCATTC_AAGGAATC_CCATTGTG	8	183	0.0437158	1_day_old
TAGGCATG_GATCATTC_GTCCTTCG_AATAACGT	132	5088	0.0259434	1_day_old
TAGGCATG_GATTCCCA_AAGGAATC_TGCGAAGT	31	711	0.0436006	1_day_old
TAGGCATG_GGCACGGA_GTCCTTCG_TTACGCCG	306	8064	0.0379464	1_day_old
TAGGCATG_GGGCTTGG_GTCCTTCG_TTACGCCG	1135	30064	0.0377528	1_day_old
TAGGCATG_GGTGAAGG_AAGGAATC_AATAACGT	181	9424	0.0192063	1_day_old
TAGGCATG_GGTGAAGG_AAGGAATC_GTCACGTC	208	6783	0.0306649	1_day_old
TAGGCATG_GGTGAAGG_ATGTAGAC_TGCGAAGT	158	4009	0.0394113	1_day_old
TAGGCATG_GTGTATCG_ATGTAGAC_AATTCTAA	208	6224	0.033419	1_day_old
TAGGCATG_GTGTATCG_ATGTAGAC_TGCGAAGT	25	1433	0.0174459	1_day_old
TAGGCATG_GTGTATCG_GTCCTTCG_AATAACGT	19	163	0.116564	1_day_old
TAGGCATG_TACTGACC_TAACGATT_TTACGCCG	75	3327	0.0225428	1_day_old
TAGGCATG_TATCCTCT_ATGTAGAC_GCGGTTAA	87	3818	0.0227868	1_day_old
TAGGCATG_TCCATCAA_AAGGAATC_CGGCGACA	493	17131	0.0287782	1_day_old
TAGGCATG_TCCGAGTT_TAACGATT_GCGGTTAA	6	181	0.0331492	1_day_old
TAGGCATG_TGTTCCTG_TAACGATT_CCATTGTG	231	7723	0.0299107	1_day_old
TAGGCATG_TTGCCTAA_GTCCTTCG_TGCGAAGT	154	4681	0.032899	1_day_old
TCAGCTAT_ACCGGCCC_ATGTAGAC_GTCACGTC	136	5847	0.0232598	1_day_old
TCAGCTAT_ACGATAAC_GTCCTTCG_TTACGCCG	370	13982	0.0264626	1_day_old
TCAGCTAT_ACGCGCAG_AAGGAATC_CGGCGACA	42	1841	0.0228137	1_day_old
TCAGCTAT_ACTGCATA_TAACGATT_CGGCGACA	40	2715	0.014733	1_day_old
TCAGCTAT_ACTTAGAA_ATGTAGAC_CGGCGACA	286	10545	0.0271219	1_day_old
TCAGCTAT_ACTTAGAA_GTCCTTCG_GCGGTTAA	229	9607	0.0238368	1_day_old
TCAGCTAT_AGAGATCT_GTCCTTCG_TGCGAAGT	27	284	0.0950704	1_day_old
TCAGCTAT_AGCCGTTC_GTCCTTCG_GTCACGTC	17	1001	0.016983	1_day_old
TCAGCTAT_AGTCCGAG_GTCCTTCG_TGCGAAGT	399	12078	0.0330353	1_day_old
TCAGCTAT_ATCCAGGA_ATGTAGAC_CGGCGACA	525	14852	0.0353488	1_day_old
TCAGCTAT_ATCCAGGA_TAACGATT_AATAACGT	64	2398	0.0266889	1_day_old
TCAGCTAT_ATCCAGGA_TAACGATT_GCGGTTAA	85	3272	0.025978	1_day_old
TCAGCTAT_ATGGTCAT_ATGTAGAC_CGGCGACA	435	17984	0.0241882	1_day_old
TCAGCTAT_ATTACCGT_AAGGAATC_TGCGAAGT	163	5413	0.0301127	1_day_old
TCAGCTAT_ATTACCGT_AAGGAATC_TTACGCCG	355	9998	0.0355071	1_day_old
TCAGCTAT_CCAGTTTA_GTCCTTCG_CGGCGACA	198	7788	0.0254237	1_day_old
TCAGCTAT_CGATAGGG_ATGTAGAC_GTCACGTC	42	1635	0.0256881	1_day_old
TCAGCTAT_CGATAGGG_GTCCTTCG_CCATTGTG	195	5846	0.0333561	1_day_old
TCAGCTAT_CTAAGCCT_ATGTAGAC_CGGCGACA	88	2824	0.0311615	1_day_old
TCAGCTAT_CTAAGCCT_GTCCTTCG_CCATTGTG	269	8974	0.0299755	1_day_old
TCAGCTAT_CTCTCTAT_ATGTAGAC_GCGGTTAA	309	8065	0.0383137	1_day_old
TCAGCTAT_GAACTCGA_ATGTAGAC_TGCGAAGT	138	5770	0.0239168	1_day_old
TCAGCTAT_GATCATTC_AAGGAATC_GTCACGTC	638	20368	0.0313236	1_day_old
TCAGCTAT_GGCACGGA_GTCCTTCG_CCATTGTG	139	6115	0.022731	1_day_old
TCAGCTAT_TAAGTTAC_TAACGATT_CGGCGACA	40	1486	0.0269179	1_day_old
TCAGCTAT_TACTGACC_GTCCTTCG_AATAACGT	1041	32377	0.0321525	1_day_old
TCAGCTAT_TATCCTCT_TAACGATT_GTCACGTC	127	3849	0.0329956	1_day_old
TCAGCTAT_TGGGCGGT_AAGGAATC_AATAACGT	10	538	0.0185874	1_day_old
TCAGCTAT_TTGCCTAA_TAACGATT_GCGGTTAA	174	9535	0.0182486	1_day_old
TCCTGAGC_AACATGAT_AAGGAATC_AATTCTAA	166	4735	0.0350581	1_day_old
TCCTGAGC_ACATTCGT_ATGTAGAC_GTCACGTC	464	15007	0.0309189	1_day_old
TCCTGAGC_ACGATAAC_AAGGAATC_GCGGTTAA	22	454	0.0484581	1_day_old
TCCTGAGC_ACGATAAC_GTCCTTCG_TTACGCCG	217	6845	0.031702	1_day_old
TCCTGAGC_ACTGCATA_TAACGATT_AATAACGT	127	3075	0.0413008	1_day_old
TCCTGAGC_ACTTAGAA_ATGTAGAC_TGCGAAGT	112	6210	0.0180354	1_day_old
TCCTGAGC_AGCCGTTC_ATGTAGAC_AATTCTAA	144	5657	0.0254552	1_day_old
TCCTGAGC_AGCCGTTC_GTCCTTCG_TTACGCCG	50	801	0.062422	1_day_old
TCCTGAGC_AGGTTGCC_TAACGATT_GCGGTTAA	93	4870	0.0190965	1_day_old
TCCTGAGC_ATCCAGGA_TAACGATT_GTCACGTC	208	7374	0.0282072	1_day_old
TCCTGAGC_ATGGTCAT_GTCCTTCG_AATAACGT	483	20468	0.0235978	1_day_old
TCCTGAGC_ATTACCGT_AAGGAATC_TTACGCCG	18	255	0.0705882	1_day_old
TCCTGAGC_ATTGGGTC_GTCCTTCG_TTACGCCG	956	33051	0.028925	1_day_old
TCCTGAGC_CCAGTTTA_AAGGAATC_TGCGAAGT	24	537	0.0446927	1_day_old
TCCTGAGC_CCAGTTTA_GTCCTTCG_TGCGAAGT	13	216	0.0601852	1_day_old
TCCTGAGC_CCTTATGT_GTCCTTCG_AATAACGT	218	7439	0.029305	1_day_old
TCCTGAGC_CGTACCAA_GTCCTTCG_AATAACGT	17	325	0.0523077	1_day_old
TCCTGAGC_CTAAGCCT_AAGGAATC_AATTCTAA	540	19228	0.028084	1_day_old
TCCTGAGC_CTAAGCCT_AAGGAATC_CGGCGACA	325	9439	0.0344316	1_day_old
TCCTGAGC_CTCTCTAT_AAGGAATC_GCGGTTAA	610	24097	0.0253144	1_day_old
TCCTGAGC_CTTTAACA_GTCCTTCG_CCATTGTG	160	4145	0.0386007	1_day_old
TCCTGAGC_CTTTAACA_GTCCTTCG_GTCACGTC	176	4770	0.0368973	1_day_old
[truncated: 39,352 more rows]

## Sheet: Table_S6_cell_numbers
ISC/Ebs	# of cells	median fragments per cell
[truncated: 18 more rows]

[truncated: 20 more sheets: Table_S7_genes_in_peaks, Table_S8_ISC_EB_gene_counts, Table_S9_EE_gene_counts, Table_S10_enterocyte_gene_count, Table_S11_1dayold_diff_analysis, Table_S12_ISC_EB_diff_analysis, Table_S13_EE_diff_analys, Table_S14_enterocyte_diff_analy, Table_S15_ISC_EB_GO_loseH3K27me, Table_S16_EE_GO_loseH3K27me3, Table_S17_enhancers_ISC_EB, Table_S18_enhancers_EC, Table_S19_EC_GO_loseH3K27me3, Table_S20_EC_GO_gainH3K27me3, Table_S21_scRNAseq_cell_counts, Table_S22_RNAPIIS5P_prom_counts, Table_S23_Tauc_etal_cell_counts, Table_S24_RNAPIIS5P_diff_analys, Table_S25_Pc_prom_counts, Table_S26_Pc_signal_vs_IgG]
